# Supplementary material for: Operational outcomes of propofol sedation versus fentanyl, midazolam and diphenhydramine sedation for endoscopies and colonoscopies at an academic medical center
Source: PLoS One. 2023 Nov 27;18(11):e0294418. doi: 10.1371/journal.pone.0294418 (PMC10681235; doi:10.1371/journal.pone.0294418)
Supplement: S1 File — Operational data from study period and post hoc analysis of case volumes. (XLSX) [file pone.0294418.s001.xlsx]

## Sheet: Operational Data
Operational Data
SEDATION_PROVIDER	SEX	AGE	BMI	Procedure	IN_ROOM_TIME	SCOPE_IN_TIME	INROOM-SCOPEIN	PAIN_MED_GIVEN_TIME	SEDATIONSTART-SCOPEIN	SCOPE_OUT_TIME	OUT_ROOM_TIME	SCOPEOUT-OUTROOM	PACU_ENTRY_TIME	PACU_DISCHARGE_TIME	PROC_CASE_LENGTH	PACU_TIME	Apnea	Asthma	CoronArtD	GERD	HepDys	HyperTension	KidneyD	LiverD	PulHyTen	RenalDysOrFail	ValvularD	Sum of MedHxBinaries	Ondanestron_Dose	Ondanestron_Unit	Haloperidol_Dose	Haloperidol_Unit	Prochlorperazine_Dose	Prochlorperazine_Unit	Promethazine_Dose	Promethazine_Unit	Hydromorphone_Dose	Hydromorphone_Unit	Fentanyl_Dose	Fentanyl_Unit	Morphine_Dose	Morphine_Unit	Tramadol_Dose	Tramadol_Unit	Acetaminophen_Dose	Acetaminophen_Unit	Oxycodone_Dose	Oxycodone_Unit	Ketorolac_Dose
Nursing	Male	68	40.19	Lower GI	2021-03-03 12:58:00	2021-03-03 13:21:00	23	2021-03-03 13:13:00	8	2021-03-03 13:45:00	2021-03-03 13:49:44	4	2021-03-03 13:55:00	2021-03-03 14:22:00	51	27	0	0	0	0	0	1	1	1	0	1	0	4	NULL	NULL	NULL	NULL	NULL	NULL	NULL	NULL	NULL	NULL	NULL	NULL	NULL	NULL	NULL	NULL	NULL	NULL	NULL	NULL	NULL
Nursing	Female	72	23.96	Lower GI	2021-03-09 09:46:55	2021-03-09 10:20:00	34	2021-03-09 10:13:11	7	2021-03-09 10:37:00	2021-03-09 10:40:57	3	2021-03-09 10:50:00	2021-03-09 11:54:00	54	64	0	1	0	0	0	1	1	0	0	1	0	4	NULL	NULL	NULL	NULL	NULL	NULL	NULL	NULL	NULL	NULL	NULL	NULL	NULL	NULL	NULL	NULL	NULL	NULL	NULL	NULL	NULL
Nursing	Male	77	23.57	Lower GI	2020-01-09 15:00:00	2020-01-09 15:13:00	13	2020-01-09 15:05:00	8	2020-01-09 16:04:00	2020-01-09 16:08:28	4	2020-01-09 16:10:00	2020-01-09 17:07:00	68	57	0	0	0	0	0	1	1	0	0	1	0	3	NULL	NULL	NULL	NULL	NULL	NULL	NULL	NULL	NULL	NULL	NULL	NULL	NULL	NULL	NULL	NULL	NULL	NULL	NULL	NULL	NULL
Nursing	Male	73	25.37	DUAL	2021-04-08 13:08:18	2021-04-08 13:41:00	33	2021-04-08 13:36:33	5	2021-04-08 14:18:00	2021-04-08 14:21:10	3	2021-04-08 14:30:00	2021-04-08 14:52:00	73	22	0	0	0	0	0	0	0	0	0	0	0	0	NULL	NULL	NULL	NULL	NULL	NULL	NULL	NULL	NULL	NULL	NULL	NULL	NULL	NULL	NULL	NULL	NULL	NULL	NULL	NULL	NULL
Nursing	Female	64	46.99	Lower GI	2021-06-18 09:06:12	2021-06-18 09:17:00	11	2021-06-18 09:10:00	7	2021-06-18 10:11:00	2021-06-18 10:13:52	2	2021-06-18 10:18:00	2021-06-18 10:50:00	67	32	0	0	0	0	0	1	0	0	0	0	0	1	NULL	NULL	NULL	NULL	NULL	NULL	NULL	NULL	NULL	NULL	NULL	NULL	NULL	NULL	NULL	NULL	NULL	NULL	NULL	NULL	NULL
Nursing	Female	68	40.6	Upper GI	2020-07-07 09:22:21	2020-07-07 10:09:00	47	2020-07-07 10:01:47	8	2020-07-07 10:13:00	2020-07-07 10:26:37	13	2020-07-07 10:22:00	2020-07-07 11:00:00	64	38	1	0	0	0	0	1	1	1	1	1	0	6	NULL	NULL	NULL	NULL	NULL	NULL	NULL	NULL	NULL	NULL	NULL	NULL	NULL	NULL	NULL	NULL	NULL	NULL	NULL	NULL	NULL
Anesthesia	Male	80	23.71	Lower GI	2021-09-03 15:50:41	2021-09-03 15:55:00	5	2021-09-03 15:50:00	5	2021-09-03 16:17:00	2021-09-03 16:19:18	2	2021-09-03 16:26:00	2021-09-03 17:09:00	29	43	NULL	NULL	NULL	NULL	NULL	NULL	NULL	NULL	NULL	NULL	NULL	0	NULL	NULL	NULL	NULL	NULL	NULL	NULL	NULL	NULL	NULL	NULL	NULL	NULL	NULL	NULL	NULL	NULL	NULL	NULL	NULL	NULL
Anesthesia	Male	78	37.12	Upper GI	2021-08-24 14:27:00	2021-08-24 14:42:00	15	2021-08-24 14:32:00	10	2021-08-24 14:45:00	2021-08-24 14:50:40	5	2021-08-24 14:53:00	2021-08-24 15:25:00	23	32	0	0	0	1	0	0	1	1	0	1	0	4	NULL	NULL	NULL	NULL	NULL	NULL	NULL	NULL	NULL	NULL	NULL	NULL	NULL	NULL	NULL	NULL	NULL	NULL	NULL	NULL	NULL
Nursing	Male	77	37.12	Upper GI	2020-02-06 16:04:37	2020-02-06 16:44:00	40	2020-02-06 16:33:18	11	2020-02-06 16:47:00	2020-02-06 16:57:36	10	2020-02-06 17:00:00	2020-02-06 17:30:00	53	30	0	0	0	1	0	0	1	1	0	1	0	4	NULL	NULL	NULL	NULL	NULL	NULL	NULL	NULL	NULL	NULL	NULL	NULL	NULL	NULL	NULL	NULL	NULL	NULL	NULL	NULL	NULL
Nursing	Female	74	23.54	Lower GI	2021-04-13 09:30:14	2021-04-13 10:24:00	54	2021-04-13 10:17:55	7	2021-04-13 10:46:00	2021-04-13 10:48:52	2	2021-04-13 10:55:00	2021-04-13 11:34:00	78	39	0	0	0	0	0	0	0	0	0	0	0	0	NULL	NULL	NULL	NULL	NULL	NULL	NULL	NULL	NULL	NULL	NULL	NULL	NULL	NULL	NULL	NULL	NULL	NULL	NULL	NULL	NULL
Nursing	Male	64	28.59	Lower GI	2020-02-24 07:04:42	2020-02-24 07:15:00	11	2020-02-24 07:10:02	5	2020-02-24 07:49:00	2020-02-24 07:53:28	4	2020-02-24 07:55:00	2020-02-24 08:33:00	49	38	NULL	NULL	NULL	NULL	NULL	NULL	NULL	NULL	NULL	NULL	NULL	0	NULL	NULL	NULL	NULL	NULL	NULL	NULL	NULL	NULL	NULL	NULL	NULL	NULL	NULL	NULL	NULL	NULL	NULL	NULL	NULL	NULL
Nursing	Male	61	30.24	Lower GI	2021-03-03 10:28:57	2021-03-03 10:58:00	30	2021-03-03 10:47:25	11	2021-03-03 11:12:00	2021-03-03 11:14:47	2	2021-03-03 11:20:00	2021-03-03 11:37:00	46	17	NULL	NULL	NULL	NULL	NULL	NULL	NULL	NULL	NULL	NULL	NULL	0	NULL	NULL	NULL	NULL	NULL	NULL	NULL	NULL	NULL	NULL	NULL	NULL	NULL	NULL	NULL	NULL	NULL	NULL	NULL	NULL	NULL
Nursing	Female	80	25.96	Lower GI	2021-06-29 09:30:00	2021-06-29 09:55:00	25	2021-06-29 09:46:00	9	2021-06-29 10:35:00	2021-06-29 10:38:30	3	2021-06-29 10:45:00	2021-06-29 11:50:00	68	65	1	0	0	1	0	1	1	1	0	1	0	6	NULL	NULL	NULL	NULL	NULL	NULL	NULL	NULL	NULL	NULL	NULL	NULL	NULL	NULL	NULL	NULL	NULL	NULL	NULL	NULL	NULL
Nursing	Female	71	27.44	Lower GI	2021-01-19 08:47:47	2021-01-19 09:19:00	32	2021-01-19 09:11:11	8	2021-01-19 09:47:00	2021-01-19 09:51:55	4	2021-01-19 09:55:00	2021-01-19 10:30:00	64	35	1	0	0	0	0	1	0	0	0	0	0	2	NULL	NULL	NULL	NULL	NULL	NULL	NULL	NULL	NULL	NULL	NULL	NULL	NULL	NULL	NULL	NULL	NULL	NULL	NULL	NULL	NULL
Nursing	Female	60	25.06	Lower GI	2020-10-15 10:50:38	2020-10-15 11:12:00	22	2020-10-15 11:04:30	8	2020-10-15 11:32:00	2020-10-15 11:35:17	3	2020-10-15 11:39:00	2020-10-15 12:45:00	45	66	0	0	0	1	0	0	0	0	0	0	0	1	NULL	NULL	NULL	NULL	NULL	NULL	NULL	NULL	NULL	NULL	NULL	NULL	NULL	NULL	NULL	NULL	NULL	NULL	NULL	NULL	NULL
Nursing	Male	70	28.7	Lower GI	2020-08-18 07:50:47	2020-08-18 08:01:00	11	2020-08-18 07:50:00	11	2020-08-18 08:16:00	2020-08-18 08:20:00	4	2020-08-18 08:27:00	2020-08-18 09:10:00	30	43	NULL	NULL	NULL	NULL	NULL	NULL	NULL	NULL	NULL	NULL	NULL	0	NULL	NULL	NULL	NULL	NULL	NULL	NULL	NULL	NULL	NULL	NULL	NULL	NULL	NULL	NULL	NULL	NULL	NULL	NULL	NULL	NULL
Anesthesia	Male	73	29.8	Lower GI	2021-08-17 09:55:59	2021-08-17 10:01:00	6	2021-08-17 09:55:00	6	2021-08-17 10:35:00	2021-08-17 10:38:41	3	2021-08-17 10:40:00	2021-08-17 11:40:00	43	60	0	0	1	1	0	1	0	0	0	0	0	3	NULL	NULL	NULL	NULL	NULL	NULL	NULL	NULL	NULL	NULL	NULL	NULL	NULL	NULL	NULL	NULL	NULL	NULL	NULL	NULL	NULL
Nursing	Male	74	20.6	Lower GI	2021-02-10 09:37:29	2021-02-10 10:17:00	40	2021-02-10 10:08:15	9	2021-02-10 10:38:00	2021-02-10 10:39:24	1	2021-02-10 10:43:00	2021-02-10 11:45:00	62	62	0	1	0	1	0	1	0	0	0	0	0	3	NULL	NULL	NULL	NULL	NULL	NULL	NULL	NULL	NULL	NULL	NULL	NULL	NULL	NULL	NULL	NULL	NULL	NULL	NULL	NULL	NULL
Nursing	Female	77	21.54	Upper GI	2021-04-22 15:45:44	2021-04-22 16:34:00	49	2021-04-22 16:32:00	2	2021-04-22 16:43:00	2021-04-22 16:49:07	6	2021-04-22 16:54:00	2021-04-22 17:53:00	64	59	0	0	0	1	0	0	0	0	0	0	0	1	NULL	NULL	NULL	NULL	NULL	NULL	NULL	NULL	NULL	NULL	NULL	NULL	NULL	NULL	NULL	NULL	NULL	NULL	NULL	NULL	NULL
Nursing	Female	79	26.46	Lower GI	2021-04-21 07:29:54	2021-04-21 07:54:00	25	2021-04-21 07:45:00	9	2021-04-21 08:09:00	2021-04-21 08:13:11	4	2021-04-21 08:18:00	2021-04-21 08:37:00	44	19	0	0	0	0	0	1	0	0	0	0	0	1	NULL	NULL	NULL	NULL	NULL	NULL	NULL	NULL	NULL	NULL	NULL	NULL	NULL	NULL	NULL	NULL	NULL	NULL	NULL	NULL	NULL
Nursing	Male	63	28.7	Upper GI	2021-01-19 10:33:07	2021-01-19 11:20:00	47	2021-01-19 11:12:11	8	2021-01-19 11:28:00	2021-01-19 11:30:30	2	2021-01-19 11:37:00	2021-01-19 12:46:00	57	69	1	0	0	0	0	0	0	0	0	0	0	1	NULL	NULL	NULL	NULL	NULL	NULL	NULL	NULL	NULL	NULL	NULL	NULL	NULL	NULL	NULL	NULL	NULL	NULL	NULL	NULL	NULL
Anesthesia	Female	60	21.93	Upper GI	2021-10-25 15:12:49	2021-10-25 15:27:00	15	2021-10-25 15:22:00	5	2021-10-25 15:42:00	2021-10-25 15:45:11	3	2021-10-25 15:49:00	2021-10-25 16:14:00	33	25	0	1	0	1	0	1	0	0	0	0	0	3	NULL	NULL	NULL	NULL	NULL	NULL	NULL	NULL	NULL	NULL	NULL	NULL	NULL	NULL	NULL	NULL	NULL	NULL	NULL	NULL	NULL
Anesthesia	Male	66	25.82	Lower GI	2021-10-06 08:48:54	2021-10-06 08:58:00	10	2021-10-06 08:54:00	4	2021-10-06 09:21:00	2021-10-06 09:24:03	3	2021-10-06 09:29:00	2021-10-06 10:25:00	36	56	0	0	0	0	0	1	0	1	0	0	0	2	NULL	NULL	NULL	NULL	NULL	NULL	NULL	NULL	NULL	NULL	NULL	NULL	NULL	NULL	NULL	NULL	NULL	NULL	NULL	NULL	NULL
Nursing	Male	66	27.98	Lower GI	2021-01-13 13:03:07	2021-01-13 13:13:00	10	2021-01-13 13:05:00	8	2021-01-13 13:37:00	2021-01-13 13:38:48	1	2021-01-13 13:45:00	2021-01-13 14:00:00	35	15	1	0	0	0	0	0	0	0	0	0	0	1	NULL	NULL	NULL	NULL	NULL	NULL	NULL	NULL	NULL	NULL	NULL	NULL	NULL	NULL	NULL	NULL	NULL	NULL	NULL	NULL	NULL
Nursing	Male	68	NULL	Lower GI	2020-02-19 07:26:56	2020-02-19 08:00:00	34	2020-02-19 07:48:38	12	2020-02-19 08:30:00	2020-02-19 08:33:30	3	2020-02-19 08:37:00	2020-02-19 09:00:00	67	23	1	0	0	0	0	0	0	0	0	0	0	1	NULL	NULL	NULL	NULL	NULL	NULL	NULL	NULL	NULL	NULL	NULL	NULL	NULL	NULL	NULL	NULL	NULL	NULL	NULL	NULL	NULL
Nursing	Female	60	22.86	Lower GI	2020-01-10 11:00:28	2020-01-10 11:34:00	34	2020-01-10 11:26:00	8	2020-01-10 11:53:00	2020-01-10 11:54:37	1	2020-01-10 11:51:00	2020-01-10 12:20:00	54	29	0	0	0	0	0	0	0	1	0	0	0	1	NULL	NULL	NULL	NULL	NULL	NULL	NULL	NULL	NULL	NULL	NULL	NULL	NULL	NULL	NULL	NULL	NULL	NULL	NULL	NULL	NULL
Anesthesia	Female	85	19.29	Upper GI	2021-09-14 08:20:35	2021-09-14 08:32:00	12	2021-09-14 08:26:00	6	2021-09-14 08:35:00	2021-09-14 08:39:35	4	2021-09-14 08:45:00	2021-09-14 09:40:00	19	55	0	1	1	0	0	1	0	0	0	0	0	3	NULL	NULL	NULL	NULL	NULL	NULL	NULL	NULL	NULL	NULL	NULL	NULL	NULL	NULL	NULL	NULL	NULL	NULL	NULL	NULL	NULL
Nursing	Female	62	18.8	Upper GI	2021-06-01 07:21:13	2021-06-01 07:43:00	22	2021-06-01 07:36:55	7	2021-06-01 07:49:00	2021-06-01 07:50:44	1	2021-06-01 08:00:00	2021-06-01 08:23:00	29	23	0	0	0	1	0	0	1	0	0	1	0	3	NULL	NULL	NULL	NULL	NULL	NULL	NULL	NULL	NULL	NULL	NULL	NULL	NULL	NULL	NULL	NULL	NULL	NULL	NULL	NULL	NULL
Nursing	Male	58	32.43	Lower GI	2020-01-13 14:20:47	2020-01-13 14:54:00	34	2020-01-13 14:46:17	8	2020-01-13 15:13:00	2020-01-13 15:19:14	6	2020-01-13 15:23:00	2020-01-13 16:05:00	59	42	0	0	0	0	0	1	0	0	0	0	0	1	NULL	NULL	NULL	NULL	NULL	NULL	NULL	NULL	NULL	NULL	NULL	NULL	NULL	NULL	NULL	NULL	NULL	NULL	NULL	NULL	NULL
Nursing	Female	63	32.22	Lower GI	2020-01-29 12:49:27	2020-01-29 12:59:00	10	2020-01-29 12:53:37	6	2020-01-29 13:09:00	2020-01-29 13:40:54	31	2020-01-29 13:15:00	2020-01-29 14:44:00	51	89	NULL	NULL	NULL	NULL	NULL	NULL	NULL	NULL	NULL	NULL	NULL	0	4	mg	NULL	NULL	NULL	NULL	NULL	NULL	NULL	NULL	NULL	NULL	NULL	NULL	NULL	NULL	NULL	NULL	NULL	NULL	NULL
Anesthesia	Male	69	23.68	Lower GI	2021-08-24 10:35:14	2021-08-24 10:54:00	19	2021-08-24 10:48:00	6	2021-08-24 11:32:00	2021-08-24 11:34:32	2	2021-08-24 11:38:00	2021-08-24 11:43:00	59	5	NULL	NULL	NULL	NULL	NULL	NULL	NULL	NULL	NULL	NULL	NULL	0	NULL	NULL	NULL	NULL	NULL	NULL	NULL	NULL	NULL	NULL	NULL	NULL	NULL	NULL	NULL	NULL	NULL	NULL	NULL	NULL	NULL
Nursing	Male	67	28.59	Lower GI	2021-04-26 15:17:20	2021-04-26 15:29:00	12	2021-04-26 15:21:00	8	2021-04-26 15:47:00	2021-04-26 15:50:47	3	2021-04-26 15:49:00	2021-04-26 16:45:00	33	56	0	0	0	0	0	1	1	0	0	1	0	3	NULL	NULL	NULL	NULL	NULL	NULL	NULL	NULL	NULL	NULL	NULL	NULL	NULL	NULL	NULL	NULL	NULL	NULL	NULL	NULL	NULL
Nursing	Female	73	29.08	Lower GI	2021-04-07 14:41:39	2021-04-07 15:28:00	47	2021-04-07 15:22:12	6	2021-04-07 15:41:00	2021-04-07 15:42:53	1	2021-04-07 15:51:00	2021-04-07 16:23:00	61	32	0	0	0	1	0	1	0	0	0	0	0	2	NULL	NULL	NULL	NULL	NULL	NULL	NULL	NULL	NULL	NULL	NULL	NULL	NULL	NULL	NULL	NULL	NULL	NULL	NULL	NULL	NULL
Anesthesia	Male	75	22.56	Upper GI	2021-10-14 12:16:30	2021-10-14 12:21:00	5	2021-10-14 12:15:00	6	2021-10-14 12:28:00	2021-10-14 12:31:48	3	2021-10-14 12:40:00	2021-10-14 13:28:00	15	48	0	0	0	0	0	1	0	1	0	0	0	2	NULL	NULL	NULL	NULL	NULL	NULL	NULL	NULL	NULL	NULL	NULL	NULL	NULL	NULL	NULL	NULL	NULL	NULL	NULL	NULL	NULL
Anesthesia	Male	58	25.23	Lower GI	2021-10-20 12:33:12	2021-10-20 13:01:00	28	2021-10-20 12:56:00	5	2021-10-20 13:31:00	2021-10-20 13:37:31	6	2021-10-20 13:37:00	2021-10-20 14:35:00	64	58	0	1	0	1	0	0	1	0	0	1	0	4	NULL	NULL	NULL	NULL	NULL	NULL	NULL	NULL	NULL	NULL	NULL	NULL	NULL	NULL	NULL	NULL	NULL	NULL	NULL	NULL	NULL
Nursing	Male	81	NULL	Upper GI	2020-10-29 15:38:36	2020-10-29 16:06:00	28	2020-10-29 15:55:02	11	2020-10-29 16:09:00	2020-10-29 16:11:51	2	2020-10-29 16:19:00	2020-10-29 17:39:00	33	80	0	0	0	1	0	0	0	0	0	0	0	1	NULL	NULL	NULL	NULL	NULL	NULL	NULL	NULL	NULL	NULL	NULL	NULL	NULL	NULL	NULL	NULL	NULL	NULL	NULL	NULL	NULL
Nursing	Female	82	32.01	Lower GI	2020-11-18 10:38:37	2020-11-18 10:55:00	17	2020-11-18 10:46:24	9	2020-11-18 11:14:00	2020-11-18 11:20:37	6	2020-11-18 11:23:00	2020-11-18 12:47:00	42	84	0	0	0	0	0	1	0	0	0	0	0	1	NULL	NULL	NULL	NULL	NULL	NULL	NULL	NULL	NULL	NULL	NULL	NULL	NULL	NULL	NULL	NULL	NULL	NULL	NULL	NULL	NULL
Nursing	Female	63	28.19	Lower GI	2020-01-16 16:45:07	2020-01-16 17:00:00	15	2020-01-16 16:53:05	7	2020-01-16 17:16:00	2020-01-16 17:22:06	6	2020-01-16 17:27:00	2020-01-16 17:57:00	37	30	NULL	NULL	NULL	NULL	NULL	NULL	NULL	NULL	NULL	NULL	NULL	0	NULL	NULL	NULL	NULL	NULL	NULL	NULL	NULL	NULL	NULL	NULL	NULL	NULL	NULL	NULL	NULL	NULL	NULL	NULL	NULL	NULL
Nursing	Male	66	17.22	Lower GI	2021-04-27 14:09:33	2021-04-27 14:32:00	23	2021-04-27 14:18:23	14	2021-04-27 14:59:00	2021-04-27 15:05:24	6	2021-04-27 15:08:00	2021-04-27 15:40:00	56	32	0	1	0	0	0	0	0	1	0	0	0	2	NULL	NULL	NULL	NULL	NULL	NULL	NULL	NULL	NULL	NULL	NULL	NULL	NULL	NULL	NULL	NULL	NULL	NULL	NULL	NULL	NULL
Nursing	Female	75	22.96	Lower GI	2021-02-10 10:58:31	2021-02-10 11:44:00	46	2021-02-10 11:35:21	9	2021-02-10 12:08:00	2021-02-10 12:21:45	13	2021-02-10 12:22:00	2021-02-10 13:15:00	83	53	0	1	0	1	0	1	0	0	0	0	0	3	NULL	NULL	NULL	NULL	NULL	NULL	NULL	NULL	NULL	NULL	NULL	NULL	NULL	NULL	NULL	NULL	NULL	NULL	NULL	NULL	NULL
Nursing	Male	55	30.27	DUAL	2020-02-25 12:54:27	2020-02-25 13:23:00	29	2020-02-25 13:05:42	18	2020-02-25 13:54:00	2020-02-25 13:58:10	4	2020-02-25 13:33:00	2020-02-25 14:20:00	64	47	1	0	0	1	0	1	1	0	0	1	0	5	NULL	NULL	NULL	NULL	NULL	NULL	NULL	NULL	NULL	NULL	NULL	NULL	NULL	NULL	NULL	NULL	NULL	NULL	NULL	NULL	NULL
Nursing	Male	55	34.23	Lower GI	2020-01-28 06:39:03	2020-01-28 07:24:00	45	2020-01-28 07:18:58	6	2020-01-28 07:44:00	2020-01-28 07:47:13	3	2020-01-28 07:52:00	2020-01-28 08:27:00	68	35	1	1	0	1	0	0	0	0	0	0	0	3	NULL	NULL	NULL	NULL	NULL	NULL	NULL	NULL	NULL	NULL	NULL	NULL	NULL	NULL	NULL	NULL	NULL	NULL	NULL	NULL	NULL
Nursing	Male	58	32.49	Upper GI	2021-05-10 16:03:42	2021-05-10 16:22:00	19	2021-05-10 16:13:56	9	2021-05-10 16:30:00	2021-05-10 16:34:40	4	2021-05-10 16:40:00	2021-05-10 17:32:00	31	52	0	0	0	0	1	0	0	1	0	0	0	2	NULL	NULL	NULL	NULL	NULL	NULL	NULL	NULL	NULL	NULL	NULL	NULL	NULL	NULL	NULL	NULL	NULL	NULL	NULL	NULL	NULL
Nursing	Female	64	21.77	Upper GI	2020-09-08 10:16:15	2020-09-08 10:44:00	28	2020-09-08 10:38:35	6	2020-09-08 10:49:00	2020-09-08 10:51:18	2	2020-09-08 10:56:00	2020-09-08 12:23:00	35	87	0	1	0	0	0	1	0	1	0	0	0	3	NULL	NULL	NULL	NULL	NULL	NULL	NULL	NULL	NULL	NULL	NULL	NULL	NULL	NULL	NULL	NULL	NULL	NULL	NULL	NULL	NULL
Nursing	Female	65	19.75	Upper GI	2021-04-27 11:26:07	2021-04-27 12:20:00	54	2021-04-27 12:16:40	4	2021-04-27 12:22:00	2021-04-27 12:23:53	1	2021-04-27 12:27:00	2021-04-27 13:37:00	57	70	0	1	0	0	0	1	0	1	0	0	0	3	NULL	NULL	NULL	NULL	NULL	NULL	NULL	NULL	NULL	NULL	NULL	NULL	NULL	NULL	NULL	NULL	NULL	NULL	NULL	NULL	NULL
Nursing	Female	75	20.36	Lower GI	2021-03-22 14:42:41	2021-03-22 15:23:00	41	2021-03-22 15:09:25	14	2021-03-22 15:29:00	2021-03-22 15:36:00	7	2021-03-22 15:40:00	2021-03-22 16:28:00	54	48	0	0	0	1	0	1	0	0	0	0	0	2	NULL	NULL	NULL	NULL	NULL	NULL	NULL	NULL	NULL	NULL	NULL	NULL	NULL	NULL	NULL	NULL	NULL	NULL	NULL	NULL	NULL
Nursing	Female	68	29.26	Lower GI	2020-03-11 08:39:20	2020-03-11 09:09:00	30	2020-03-11 08:59:18	10	2020-03-11 09:32:00	2020-03-11 09:34:45	2	2020-03-11 09:38:00	2020-03-11 10:02:00	55	24	NULL	NULL	NULL	NULL	NULL	NULL	NULL	NULL	NULL	NULL	NULL	0	NULL	NULL	NULL	NULL	NULL	NULL	NULL	NULL	NULL	NULL	NULL	NULL	NULL	NULL	NULL	NULL	NULL	NULL	NULL	NULL	NULL
Nursing	Male	56	31.28	DUAL	2021-02-23 11:08:29	2021-02-23 11:20:00	12	2021-02-23 11:12:00	8	2021-02-23 11:40:00	2021-02-23 11:41:50	1	2021-02-23 11:47:00	2021-02-23 13:16:00	33	89	0	0	0	0	0	1	0	1	0	0	0	2	NULL	NULL	NULL	NULL	NULL	NULL	NULL	NULL	NULL	NULL	NULL	NULL	NULL	NULL	NULL	NULL	NULL	NULL	NULL	NULL	NULL
Nursing	Male	65	40.61	Lower GI	2020-08-31 13:32:34	2020-08-31 14:47:00	75	2020-08-31 14:39:35	8	2020-08-31 15:15:00	2020-08-31 15:19:45	4	2020-08-31 15:30:00	2020-08-31 16:56:00	107	86	1	0	0	0	0	0	0	0	1	0	0	2	NULL	NULL	NULL	NULL	NULL	NULL	NULL	NULL	NULL	NULL	NULL	NULL	NULL	NULL	NULL	NULL	NULL	NULL	NULL	NULL	NULL
Nursing	Male	68	25.09	Lower GI	2020-06-24 10:58:30	2020-06-24 11:25:00	27	2020-06-24 11:16:55	9	2020-06-24 11:42:00	2020-06-24 11:45:05	3	2020-06-24 11:24:00	2020-06-24 12:26:00	47	62	1	0	0	0	0	0	0	0	0	0	0	1	NULL	NULL	NULL	NULL	NULL	NULL	NULL	NULL	NULL	NULL	25	mcg	NULL	NULL	NULL	NULL	NULL	NULL	NULL	NULL	NULL
Nursing	Female	63	32.5	Lower GI	2020-06-15 08:33:50	2020-06-15 08:53:00	20	2020-06-15 08:45:56	8	2020-06-15 09:14:00	2020-06-15 09:18:27	4	2020-06-15 09:20:00	2020-06-15 09:37:00	45	17	1	1	0	0	0	1	0	0	0	0	0	3	NULL	NULL	NULL	NULL	NULL	NULL	NULL	NULL	NULL	NULL	NULL	NULL	NULL	NULL	NULL	NULL	NULL	NULL	NULL	NULL	NULL
Nursing	Female	64	26.14	Lower GI	2021-02-16 06:55:16	2021-02-16 07:23:00	28	2021-02-16 07:13:37	10	2021-02-16 07:48:00	2021-02-16 09:04:12	76	2021-02-16 07:54:00	2021-02-16 08:13:00	129	19	NULL	NULL	NULL	NULL	NULL	NULL	NULL	NULL	NULL	NULL	NULL	0	NULL	NULL	NULL	NULL	NULL	NULL	NULL	NULL	NULL	NULL	NULL	NULL	NULL	NULL	NULL	NULL	NULL	NULL	NULL	NULL	NULL
Nursing	Male	57	23.53	Lower GI	2020-01-15 14:23:41	2020-01-15 15:53:00	90	2020-01-15 15:43:08	10	2020-01-15 16:10:00	2020-01-15 16:13:55	3	2020-01-15 16:22:00	2020-01-15 17:02:00	110	40	0	1	0	1	0	0	1	0	0	1	0	4	NULL	NULL	NULL	NULL	NULL	NULL	NULL	NULL	NULL	NULL	NULL	NULL	NULL	NULL	NULL	NULL	NULL	NULL	NULL	NULL	NULL
Nursing	Female	78	26.63	Lower GI	2020-07-20 10:05:05	2020-07-20 10:17:00	12	2020-07-20 10:09:47	8	2020-07-20 10:33:00	2020-07-20 10:39:15	6	2020-07-20 10:43:00	2020-07-20 10:54:00	34	11	0	0	0	1	0	1	0	0	0	0	0	2	NULL	NULL	NULL	NULL	NULL	NULL	NULL	NULL	NULL	NULL	NULL	NULL	NULL	NULL	NULL	NULL	NULL	NULL	NULL	NULL	NULL
Nursing	Male	58	25.09	Lower GI	2020-07-10 15:28:31	2020-07-10 16:16:00	48	2020-07-10 16:05:29	11	2020-07-10 16:37:00	2020-07-10 16:42:44	5	2020-07-10 16:46:00	2020-07-10 17:00:00	74	14	NULL	NULL	NULL	NULL	NULL	NULL	NULL	NULL	NULL	NULL	NULL	0	NULL	NULL	NULL	NULL	NULL	NULL	NULL	NULL	NULL	NULL	NULL	NULL	NULL	NULL	NULL	NULL	NULL	NULL	NULL	NULL	NULL
Anesthesia	Female	78	23.34	Lower GI	2021-09-08 11:36:18	2021-09-08 11:40:00	4	2021-09-08 11:35:00	5	2021-09-08 11:54:00	2021-09-08 11:55:00	1	2021-09-08 12:15:00	2021-09-08 12:53:00	19	38	0	0	0	1	0	0	0	0	0	0	0	1	NULL	NULL	NULL	NULL	NULL	NULL	NULL	NULL	NULL	NULL	NULL	NULL	NULL	NULL	NULL	NULL	NULL	NULL	NULL	NULL	NULL
Nursing	Female	75	30.9	Lower GI	2021-06-03 08:02:35	2021-06-03 08:25:00	23	2021-06-03 08:19:16	6	2021-06-03 08:36:00	2021-06-03 08:37:57	1	2021-06-03 08:41:00	2021-06-03 09:12:00	35	31	1	1	0	1	0	0	0	0	0	0	0	3	NULL	NULL	NULL	NULL	NULL	NULL	NULL	NULL	NULL	NULL	NULL	NULL	NULL	NULL	NULL	NULL	NULL	NULL	NULL	NULL	NULL
Anesthesia	Female	55	28.34	Lower GI	2021-09-15 08:58:06	2021-09-15 09:07:00	9	2021-09-15 09:01:00	6	2021-09-15 09:37:00	2021-09-15 09:38:37	1	2021-09-15 09:42:00	2021-09-15 10:00:00	40	18	1	1	0	1	0	1	0	0	0	0	0	4	NULL	NULL	NULL	NULL	NULL	NULL	NULL	NULL	NULL	NULL	NULL	NULL	NULL	NULL	NULL	NULL	NULL	NULL	NULL	NULL	NULL
Nursing	Male	56	26.78	DUAL	2021-05-06 09:37:10	2021-05-06 09:57:00	20	2021-05-06 09:46:38	11	2021-05-06 10:15:00	2021-05-06 11:08:58	53	2021-05-06 11:10:00	2021-05-06 12:04:00	91	54	0	0	0	1	0	0	0	1	0	0	0	2	NULL	NULL	NULL	NULL	NULL	NULL	NULL	NULL	NULL	NULL	NULL	NULL	NULL	NULL	NULL	NULL	NULL	NULL	NULL	NULL	NULL
Nursing	Male	53	32.99	Upper GI	2020-07-28 15:43:02	2020-07-28 15:58:00	15	2020-07-28 15:51:27	7	2020-07-28 16:01:00	2020-07-28 16:05:22	4	2020-07-28 16:10:00	2020-07-28 17:15:00	22	65	0	1	0	1	0	0	0	1	0	0	0	3	NULL	NULL	NULL	NULL	NULL	NULL	NULL	NULL	NULL	NULL	NULL	NULL	NULL	NULL	NULL	NULL	NULL	NULL	NULL	NULL	NULL
Nursing	Male	53	31.85	Lower GI	2020-03-04 13:25:11	2020-03-04 13:38:00	13	2020-03-04 13:31:06	7	2020-03-04 13:58:00	2020-03-04 14:01:53	3	2020-03-04 14:10:00	2020-03-04 14:32:00	36	22	0	0	0	0	0	1	1	0	0	1	0	3	NULL	NULL	NULL	NULL	NULL	NULL	NULL	NULL	NULL	NULL	NULL	NULL	NULL	NULL	NULL	NULL	NULL	NULL	NULL	NULL	NULL
Nursing	Female	76	18.01	Upper GI	2021-04-12 14:19:22	2021-04-12 14:49:00	30	2021-04-12 14:40:21	9	2021-04-12 14:56:00	2021-04-12 15:02:26	6	2021-04-12 15:08:00	2021-04-12 15:15:00	43	7	0	0	0	0	0	1	0	0	0	0	0	1	NULL	NULL	NULL	NULL	NULL	NULL	NULL	NULL	NULL	NULL	NULL	NULL	NULL	NULL	NULL	NULL	NULL	NULL	NULL	NULL	NULL
Anesthesia	Male	73	25.09	Lower GI	2021-10-14 10:32:30	2021-10-14 10:41:00	9	2021-10-14 10:37:00	4	2021-10-14 11:19:00	2021-10-14 11:23:29	4	2021-10-14 11:30:00	2021-10-14 12:28:00	51	58	NULL	NULL	NULL	NULL	NULL	NULL	NULL	NULL	NULL	NULL	NULL	0	NULL	NULL	NULL	NULL	NULL	NULL	NULL	NULL	NULL	NULL	NULL	NULL	NULL	NULL	NULL	NULL	NULL	NULL	NULL	NULL	NULL
Nursing	Male	72	24.41	Lower GI	2020-09-14 10:42:49	2020-09-14 11:10:00	28	2020-09-14 11:00:03	10	2020-09-14 12:07:00	2020-09-14 12:12:22	5	2020-09-14 12:19:00	2020-09-14 13:15:00	90	56	NULL	NULL	NULL	NULL	NULL	NULL	NULL	NULL	NULL	NULL	NULL	0	NULL	NULL	NULL	NULL	NULL	NULL	NULL	NULL	NULL	NULL	NULL	NULL	NULL	NULL	NULL	NULL	NULL	NULL	NULL	NULL	NULL
Nursing	Male	53	30.72	Lower GI	2020-03-09 09:29:00	2020-03-09 09:41:00	12	2020-03-09 09:35:16	6	2020-03-09 10:06:00	2020-03-09 10:10:52	4	2020-03-09 10:15:00	2020-03-09 10:17:00	41	2	NULL	NULL	NULL	NULL	NULL	NULL	NULL	NULL	NULL	NULL	NULL	0	NULL	NULL	NULL	NULL	NULL	NULL	NULL	NULL	NULL	NULL	NULL	NULL	NULL	NULL	NULL	NULL	NULL	NULL	NULL	NULL	NULL
Nursing	Female	66	27.12	Lower GI	2021-03-22 15:27:41	2021-03-22 15:46:00	19	2021-03-22 15:37:04	9	2021-03-22 16:02:00	2021-03-22 16:39:57	37	2021-03-22 16:10:00	2021-03-22 16:36:00	72	26	NULL	NULL	NULL	NULL	NULL	NULL	NULL	NULL	NULL	NULL	NULL	0	NULL	NULL	NULL	NULL	NULL	NULL	NULL	NULL	NULL	NULL	NULL	NULL	NULL	NULL	NULL	NULL	NULL	NULL	NULL	NULL	NULL
Nursing	Female	72	30.67	Lower GI	2021-03-23 06:47:12	2021-03-23 07:23:00	36	2021-03-23 07:17:42	6	2021-03-23 08:05:00	2021-03-23 08:08:47	3	2021-03-23 08:14:00	2021-03-23 08:53:00	81	39	0	0	0	1	0	0	0	0	0	0	0	1	NULL	NULL	NULL	NULL	NULL	NULL	NULL	NULL	NULL	NULL	NULL	NULL	NULL	NULL	NULL	NULL	NULL	NULL	NULL	NULL	NULL
Nursing	Female	59	22.71	Upper GI	2021-03-26 11:19:28	2021-03-26 11:33:00	14	2021-03-26 11:26:00	7	2021-03-26 11:37:00	2021-03-26 11:39:22	2	2021-03-26 11:45:00	2021-03-26 12:40:00	20	55	0	0	0	0	0	0	0	1	0	0	0	1	NULL	NULL	NULL	NULL	NULL	NULL	NULL	NULL	NULL	NULL	NULL	NULL	NULL	NULL	NULL	NULL	NULL	NULL	NULL	NULL	NULL
Anesthesia	Female	72	36.02	Lower GI	2021-10-18 13:42:00	2021-10-18 13:48:00	6	2021-10-18 13:41:00	7	2021-10-18 14:08:00	2021-10-18 14:11:33	3	2021-10-18 14:15:00	2021-10-18 14:44:00	29	29	0	1	0	0	0	1	1	0	0	1	0	4	NULL	NULL	NULL	NULL	NULL	NULL	NULL	NULL	NULL	NULL	NULL	NULL	NULL	NULL	NULL	NULL	NULL	NULL	NULL	NULL	NULL
Nursing	Female	53	NULL	Upper GI	2020-07-21 13:27:02	2020-07-21 13:43:00	16	2020-07-21 13:36:58	7	2020-07-21 13:46:00	2020-07-21 13:47:15	1	2020-07-21 13:50:00	2020-07-21 14:15:00	20	25	0	0	0	0	0	0	0	1	0	0	0	1	NULL	NULL	NULL	NULL	NULL	NULL	NULL	NULL	NULL	NULL	NULL	NULL	NULL	NULL	NULL	NULL	NULL	NULL	NULL	NULL	NULL
Anesthesia	Female	72	32.61	Upper GI	2021-09-23 13:34:06	2021-09-23 13:37:00	3	2021-09-23 13:31:00	6	2021-09-23 13:39:00	2021-09-23 13:41:13	2	2021-09-23 13:49:00	2021-09-23 14:45:00	7	56	0	0	0	0	1	1	0	1	0	0	0	3	NULL	NULL	NULL	NULL	NULL	NULL	NULL	NULL	NULL	NULL	NULL	NULL	NULL	NULL	NULL	NULL	NULL	NULL	NULL	NULL	NULL
Nursing	Male	60	27.31	Lower GI	2020-08-05 10:18:38	2020-08-05 10:33:00	15	2020-08-05 10:28:56	5	2020-08-05 10:46:00	2020-08-05 10:49:01	3	2020-08-05 10:54:00	2020-08-05 11:28:00	31	34	1	0	0	0	0	0	0	0	0	0	0	1	NULL	NULL	NULL	NULL	NULL	NULL	NULL	NULL	NULL	NULL	NULL	NULL	NULL	NULL	NULL	NULL	NULL	NULL	NULL	NULL	NULL
Nursing	Male	60	28.34	Lower GI	2021-04-05 10:02:02	2021-04-05 10:34:00	32	2021-04-05 10:25:40	9	2021-04-05 10:48:00	2021-04-05 10:52:00	4	2021-04-05 11:00:00	2021-04-05 11:59:00	50	59	1	0	0	0	0	1	0	0	0	0	0	2	NULL	NULL	NULL	NULL	NULL	NULL	NULL	NULL	NULL	NULL	NULL	NULL	NULL	NULL	NULL	NULL	NULL	NULL	NULL	NULL	NULL
Anesthesia	Male	54	22.65	Lower GI	2021-09-30 13:18:00	2021-09-30 13:28:00	10	2021-09-30 13:18:00	10	2021-09-30 13:44:00	2021-09-30 13:45:00	1	2021-09-30 13:50:00	2021-09-30 14:10:00	27	20	0	0	0	0	0	1	0	0	1	0	0	2	NULL	NULL	NULL	NULL	NULL	NULL	NULL	NULL	NULL	NULL	NULL	NULL	NULL	NULL	NULL	NULL	NULL	NULL	NULL	NULL	NULL
Nursing	Male	79	23.63	Lower GI	2020-02-19 14:06:35	2020-02-19 14:23:00	17	2020-02-19 14:17:50	6	2020-02-19 14:52:00	2020-02-19 14:57:08	5	2020-02-19 15:03:00	2020-02-19 15:57:00	51	54	0	0	1	1	0	1	1	0	0	1	1	6	NULL	NULL	NULL	NULL	NULL	NULL	NULL	NULL	NULL	NULL	NULL	NULL	NULL	NULL	NULL	NULL	NULL	NULL	NULL	NULL	NULL
Nursing	Female	54	18.88	Lower GI	2020-11-04 14:29:19	2020-11-04 14:47:00	18	2020-11-04 14:37:40	10	2020-11-04 15:06:00	2020-11-04 15:08:47	2	2020-11-04 15:13:00	2020-11-04 15:27:00	39	14	0	0	0	0	0	0	0	1	0	0	0	1	NULL	NULL	NULL	NULL	NULL	NULL	NULL	NULL	NULL	NULL	NULL	NULL	NULL	NULL	NULL	NULL	NULL	NULL	NULL	NULL	NULL
Nursing	Male	64	35.24	Upper GI	2020-10-30 14:56:53	2020-10-30 15:58:00	62	2020-10-30 15:38:00	20	2020-10-30 16:14:00	2020-10-30 16:24:36	10	2020-10-30 16:30:00	2020-10-30 17:02:00	88	32	NULL	NULL	NULL	NULL	NULL	NULL	NULL	NULL	NULL	NULL	NULL	0	NULL	NULL	NULL	NULL	NULL	NULL	NULL	NULL	NULL	NULL	NULL	NULL	NULL	NULL	NULL	NULL	NULL	NULL	NULL	NULL	NULL
Nursing	Female	52	22.86	Lower GI	2020-01-10 12:56:32	2020-01-10 13:54:00	58	2020-01-10 13:48:01	6	2020-01-10 14:13:00	2020-01-10 14:17:34	4	2020-01-10 14:23:00	2020-01-10 14:30:00	81	7	0	0	0	0	0	1	0	1	0	0	0	2	NULL	NULL	NULL	NULL	NULL	NULL	NULL	NULL	NULL	NULL	NULL	NULL	NULL	NULL	NULL	NULL	NULL	NULL	NULL	NULL	NULL
Anesthesia	Male	75	42.18	Upper GI	2021-08-30 08:34:41	2021-08-30 08:39:00	5	2021-08-30 08:34:00	5	2021-08-30 08:43:00	2021-08-30 08:53:23	10	2021-08-30 09:00:00	2021-08-30 09:36:00	19	36	0	0	0	0	0	0	0	1	0	0	0	1	NULL	NULL	NULL	NULL	NULL	NULL	NULL	NULL	NULL	NULL	NULL	NULL	NULL	NULL	NULL	NULL	NULL	NULL	NULL	NULL	NULL
Anesthesia	Female	62	29.69	Upper GI	2021-10-07 13:29:35	2021-10-07 13:43:00	14	2021-10-07 13:29:00	14	2021-10-07 13:55:00	2021-10-07 13:57:40	2	2021-10-07 14:00:00	2021-10-07 14:15:00	28	15	0	1	0	0	0	1	1	1	1	1	0	6	NULL	NULL	NULL	NULL	NULL	NULL	NULL	NULL	NULL	NULL	NULL	NULL	NULL	NULL	NULL	NULL	NULL	NULL	NULL	NULL	NULL
Nursing	Female	53	38.55	Lower GI	2021-06-24 10:30:53	2021-06-24 10:51:00	21	2021-06-24 10:44:00	7	2021-06-24 11:15:00	2021-06-24 11:17:11	2	2021-06-24 11:15:00	2021-06-24 11:30:00	47	15	NULL	NULL	NULL	NULL	NULL	NULL	NULL	NULL	NULL	NULL	NULL	0	NULL	NULL	NULL	NULL	NULL	NULL	NULL	NULL	NULL	NULL	NULL	NULL	NULL	NULL	NULL	NULL	NULL	NULL	NULL	NULL	NULL
Nursing	Female	53	23.3	Upper GI	2021-03-17 10:43:06	2021-03-17 11:27:00	44	2021-03-17 11:15:23	12	2021-03-17 11:31:00	2021-03-17 11:35:04	4	2021-03-17 11:45:00	2021-03-17 12:45:00	52	60	NULL	NULL	NULL	NULL	NULL	NULL	NULL	NULL	NULL	NULL	NULL	0	NULL	NULL	NULL	NULL	NULL	NULL	NULL	NULL	NULL	NULL	NULL	NULL	NULL	NULL	NULL	NULL	NULL	NULL	NULL	NULL	NULL
Nursing	Male	60	35.53	Upper GI	2021-03-24 10:36:32	2021-03-24 10:51:00	15	2021-03-24 10:40:00	11	2021-03-24 11:02:00	2021-03-24 11:05:00	3	2021-03-24 11:10:00	2021-03-24 11:51:00	29	41	1	0	0	0	0	0	0	1	0	0	0	2	NULL	NULL	NULL	NULL	NULL	NULL	NULL	NULL	NULL	NULL	NULL	NULL	NULL	NULL	NULL	NULL	NULL	NULL	NULL	NULL	NULL
Nursing	Male	74	31.47	Upper GI	2020-02-11 09:11:54	2020-02-11 09:50:00	39	2020-02-11 09:42:04	8	2020-02-11 09:58:00	2020-02-11 09:59:48	1	2020-02-11 10:06:00	2020-02-11 10:25:00	48	19	0	0	0	0	0	1	0	0	0	0	0	1	NULL	NULL	NULL	NULL	NULL	NULL	NULL	NULL	NULL	NULL	NULL	NULL	NULL	NULL	NULL	NULL	NULL	NULL	NULL	NULL	NULL
Nursing	Male	62	19.79	DUAL	2020-06-30 14:21:12	2020-06-30 15:08:00	47	2020-06-30 15:01:41	7	2020-06-30 15:28:00	2020-06-30 15:34:34	6	2020-06-30 15:40:00	2020-06-30 16:22:00	73	42	0	0	0	0	1	0	0	1	0	0	0	2	NULL	NULL	NULL	NULL	NULL	NULL	NULL	NULL	NULL	NULL	NULL	NULL	NULL	NULL	NULL	NULL	NULL	NULL	NULL	NULL	NULL
Anesthesia	Female	65	19.86	Lower GI	2021-10-12 13:44:33	2021-10-12 13:49:00	5	2021-10-12 13:44:00	5	2021-10-12 14:17:00	2021-10-12 14:21:19	4	2021-10-12 14:23:00	2021-10-12 14:55:00	37	32	NULL	NULL	NULL	NULL	NULL	NULL	NULL	NULL	NULL	NULL	NULL	0	NULL	NULL	NULL	NULL	NULL	NULL	NULL	NULL	NULL	NULL	NULL	NULL	NULL	NULL	NULL	NULL	NULL	NULL	NULL	NULL	NULL
Nursing	Male	53	30.68	DUAL	2021-03-02 15:10:55	2021-03-02 16:19:00	69	2021-03-02 16:10:38	9	2021-03-02 17:08:00	2021-03-02 17:14:44	6	2021-03-02 17:18:00	2021-03-02 17:48:00	124	30	1	0	0	1	0	1	0	1	0	0	0	4	NULL	NULL	NULL	NULL	NULL	NULL	NULL	NULL	NULL	NULL	NULL	NULL	NULL	NULL	NULL	NULL	NULL	NULL	NULL	NULL	NULL
Nursing	Male	60	23.88	Lower GI	2021-04-22 06:37:38	2021-04-22 07:11:00	34	2021-04-22 07:01:34	10	2021-04-22 07:25:00	2021-04-22 07:28:49	3	2021-04-22 07:34:00	2021-04-22 08:14:00	51	40	0	0	0	0	0	0	1	0	0	1	0	2	NULL	NULL	NULL	NULL	NULL	NULL	NULL	NULL	NULL	NULL	NULL	NULL	NULL	NULL	NULL	NULL	NULL	NULL	NULL	NULL	NULL
Anesthesia	Male	56	35.35	Lower GI	2021-09-22 12:16:47	2021-09-22 12:19:00	3	2021-09-22 12:13:00	6	2021-09-22 12:32:00	2021-09-22 12:34:27	2	2021-09-22 12:38:00	2021-09-22 13:27:00	18	49	0	0	0	0	0	1	0	0	0	0	0	1	NULL	NULL	NULL	NULL	NULL	NULL	NULL	NULL	NULL	NULL	NULL	NULL	NULL	NULL	NULL	NULL	NULL	NULL	NULL	NULL	NULL
Nursing	Female	56	32.89	Lower GI	2020-11-19 10:00:28	2020-11-19 10:30:00	30	2020-11-19 10:20:53	10	2020-11-19 10:58:00	2020-11-19 11:02:55	4	2020-11-19 11:08:00	2020-11-19 11:55:00	62	47	NULL	NULL	NULL	NULL	NULL	NULL	NULL	NULL	NULL	NULL	NULL	0	NULL	NULL	NULL	NULL	NULL	NULL	NULL	NULL	NULL	NULL	NULL	NULL	NULL	NULL	NULL	NULL	NULL	NULL	NULL	NULL	NULL
Nursing	Male	70	25.83	Lower GI	2020-10-29 09:40:11	2020-10-29 09:53:00	13	2020-10-29 09:46:20	7	2020-10-29 10:12:00	2020-10-29 10:13:59	1	2020-10-29 10:18:00	2020-10-29 11:05:00	33	47	0	0	0	0	0	1	0	0	0	0	0	1	NULL	NULL	NULL	NULL	NULL	NULL	NULL	NULL	NULL	NULL	NULL	NULL	NULL	NULL	NULL	NULL	NULL	NULL	NULL	NULL	NULL
Nursing	Male	58	23.63	Lower GI	2020-10-22 09:35:10	2020-10-22 10:01:00	26	2020-10-22 09:51:00	10	2020-10-22 10:22:00	2020-10-22 10:24:57	2	2020-10-22 10:30:00	2020-10-22 10:55:00	49	25	0	0	0	0	0	0	1	0	0	1	0	2	NULL	NULL	NULL	NULL	NULL	NULL	NULL	NULL	NULL	NULL	NULL	NULL	NULL	NULL	NULL	NULL	NULL	NULL	NULL	NULL	NULL
Nursing	Female	52	23.13	Lower GI	2021-04-14 09:59:06	2021-04-14 10:41:00	42	2021-04-14 10:31:28	10	2021-04-14 10:52:00	2021-04-14 10:58:37	6	2021-04-14 11:06:00	2021-04-14 11:43:00	59	37	NULL	NULL	NULL	NULL	NULL	NULL	NULL	NULL	NULL	NULL	NULL	0	NULL	NULL	NULL	NULL	NULL	NULL	NULL	NULL	NULL	NULL	NULL	NULL	NULL	NULL	NULL	NULL	NULL	NULL	NULL	NULL	NULL
Nursing	Female	74	23.17	Upper GI	2021-04-06 08:49:56	2021-04-06 09:16:00	27	2021-04-06 09:09:24	7	2021-04-06 09:23:00	2021-04-06 09:28:49	5	2021-04-06 09:30:00	2021-04-06 10:29:00	39	59	NULL	NULL	NULL	NULL	NULL	NULL	NULL	NULL	NULL	NULL	NULL	0	NULL	NULL	NULL	NULL	NULL	NULL	NULL	NULL	NULL	NULL	NULL	NULL	NULL	NULL	NULL	NULL	NULL	NULL	NULL	NULL	NULL
Nursing	Female	73	30.67	Lower GI	2020-09-29 13:04:09	2020-09-29 13:17:00	13	2020-09-29 13:07:41	10	2020-09-29 13:54:00	2020-09-29 13:58:12	4	2020-09-29 14:00:00	2020-09-29 14:59:00	54	59	0	0	0	1	0	1	1	0	0	1	0	4	NULL	NULL	NULL	NULL	NULL	NULL	NULL	NULL	NULL	NULL	NULL	NULL	NULL	NULL	NULL	NULL	NULL	NULL	NULL	NULL	NULL
Nursing	Female	62	27.46	Lower GI	2021-06-07 09:08:05	2021-06-07 09:21:00	13	2021-06-07 09:16:00	5	2021-06-07 09:46:00	2021-06-07 09:49:20	3	2021-06-07 09:54:00	2021-06-07 11:11:00	41	77	0	1	0	0	0	0	0	1	0	0	0	2	NULL	NULL	NULL	NULL	NULL	NULL	NULL	NULL	NULL	NULL	NULL	NULL	NULL	NULL	NULL	NULL	NULL	NULL	NULL	NULL	NULL
Nursing	Female	62	24.86	Lower GI	2020-07-29 15:23:51	2020-07-29 15:43:00	20	2020-07-29 15:35:03	8	2020-07-29 16:17:00	2020-07-29 16:22:32	5	2020-07-29 16:28:00	2020-07-29 17:17:00	59	49	0	0	0	1	0	0	0	1	0	0	0	2	NULL	NULL	NULL	NULL	NULL	NULL	NULL	NULL	NULL	NULL	NULL	NULL	NULL	NULL	NULL	NULL	NULL	NULL	NULL	NULL	NULL
Nursing	Female	52	31.68	Lower GI	2021-06-21 14:14:54	2021-06-21 14:54:00	40	2021-06-21 14:45:00	9	2021-06-21 15:14:00	2021-06-21 15:16:15	2	2021-06-21 15:21:00	2021-06-21 15:38:00	62	17	0	0	0	0	0	1	0	0	0	0	0	1	NULL	NULL	NULL	NULL	NULL	NULL	NULL	NULL	NULL	NULL	NULL	NULL	NULL	NULL	NULL	NULL	NULL	NULL	NULL	NULL	NULL
Nursing	Male	78	22.56	Lower GI	2020-06-09 09:56:51	2020-06-09 10:48:00	52	2020-06-09 10:42:00	6	2020-06-09 11:09:00	2020-06-09 11:13:55	4	2020-06-09 11:17:00	2020-06-09 13:14:00	77	117	1	0	0	0	0	1	0	0	0	0	0	2	NULL	NULL	NULL	NULL	NULL	NULL	NULL	NULL	NULL	NULL	NULL	NULL	NULL	NULL	NULL	NULL	NULL	NULL	NULL	NULL	NULL
Nursing	Female	67	28.35	Lower GI	2020-05-28 13:25:17	2020-05-28 13:54:00	29	2020-05-28 13:41:18	13	2020-05-28 14:15:00	2020-05-28 14:18:20	3	2020-05-28 14:24:00	2020-05-28 15:27:00	53	63	0	0	0	0	0	0	0	0	0	0	0	0	NULL	NULL	NULL	NULL	NULL	NULL	NULL	NULL	NULL	NULL	NULL	NULL	NULL	NULL	NULL	NULL	NULL	NULL	NULL	NULL	NULL
Nursing	Male	83	18.88	Lower GI	2021-03-11 08:52:47	2021-03-11 09:04:00	12	2021-03-11 08:58:00	6	2021-03-11 09:27:00	2021-03-11 09:54:36	27	2021-03-11 10:02:00	2021-03-11 11:00:00	62	58	0	0	0	0	0	0	1	0	0	1	0	2	NULL	NULL	NULL	NULL	NULL	NULL	NULL	NULL	NULL	NULL	NULL	NULL	NULL	NULL	NULL	NULL	NULL	NULL	NULL	NULL	NULL
Anesthesia	Female	51	33.53	Lower GI	2021-10-08 16:26:31	2021-10-08 16:34:00	8	2021-10-08 16:25:00	9	2021-10-08 17:00:00	2021-10-08 17:06:12	6	2021-10-08 17:08:00	2021-10-08 17:16:00	40	8	0	0	0	1	0	1	0	0	0	0	0	2	NULL	NULL	NULL	NULL	NULL	NULL	NULL	NULL	NULL	NULL	NULL	NULL	NULL	NULL	NULL	NULL	NULL	NULL	NULL	NULL	NULL
Nursing	Male	60	23.62	Upper GI	2020-02-28 16:51:43	2020-02-28 17:08:00	17	2020-02-28 16:52:33	16	2020-02-28 17:14:00	2020-02-28 17:20:24	6	2020-02-28 17:27:00	2020-02-28 18:00:00	29	33	NULL	NULL	NULL	NULL	NULL	NULL	NULL	NULL	NULL	NULL	NULL	0	NULL	NULL	NULL	NULL	NULL	NULL	NULL	NULL	NULL	NULL	NULL	NULL	NULL	NULL	NULL	NULL	NULL	NULL	NULL	NULL	NULL
Nursing	Female	71	22.8	Lower GI	2020-10-16 12:55:00	2020-10-16 13:11:00	16	2020-10-16 13:03:00	8	2020-10-16 13:35:00	2020-10-16 13:38:05	3	2020-10-16 13:43:00	2020-10-16 14:15:00	43	32	1	0	0	0	0	0	0	0	0	0	0	1	NULL	NULL	NULL	NULL	NULL	NULL	NULL	NULL	NULL	NULL	NULL	NULL	NULL	NULL	NULL	NULL	NULL	NULL	NULL	NULL	NULL
Nursing	Male	62	23.57	Lower GI	2020-02-05 11:07:15	2020-02-05 11:40:00	33	2020-02-05 11:31:40	9	2020-02-05 11:58:00	2020-02-05 12:02:19	4	2020-02-05 12:09:00	2020-02-05 12:33:00	55	24	NULL	NULL	NULL	NULL	NULL	NULL	NULL	NULL	NULL	NULL	NULL	0	NULL	NULL	NULL	NULL	NULL	NULL	NULL	NULL	NULL	NULL	NULL	NULL	NULL	NULL	NULL	NULL	NULL	NULL	NULL	NULL	NULL
Anesthesia	Female	77	24.89	Lower GI	2021-10-26 08:20:11	2021-10-26 08:45:00	25	2021-10-26 08:41:00	4	2021-10-26 09:08:00	2021-10-26 09:09:09	1	2021-10-26 09:15:00	2021-10-26 09:48:00	49	33	0	0	0	0	0	0	1	0	0	1	0	2	NULL	NULL	NULL	NULL	NULL	NULL	NULL	NULL	NULL	NULL	NULL	NULL	NULL	NULL	NULL	NULL	NULL	NULL	NULL	NULL	NULL
Anesthesia	Female	77	14.17	Upper GI	2021-08-25 07:33:00	2021-08-25 07:38:00	5	2021-08-25 07:33:00	5	2021-08-25 07:44:00	2021-08-25 07:45:00	1	2021-08-25 07:45:00	2021-08-25 08:40:00	12	55	NULL	NULL	NULL	NULL	NULL	NULL	NULL	NULL	NULL	NULL	NULL	0	NULL	NULL	NULL	NULL	NULL	NULL	NULL	NULL	NULL	NULL	NULL	NULL	NULL	NULL	NULL	NULL	NULL	NULL	NULL	NULL	NULL
Anesthesia	Male	53	24.96	Lower GI	2021-08-25 14:20:41	2021-08-25 14:27:00	7	2021-08-25 14:18:00	9	2021-08-25 14:36:00	2021-08-25 14:38:06	2	2021-08-25 14:45:00	2021-08-25 15:10:00	18	25	0	0	0	0	0	0	1	1	0	1	0	3	NULL	NULL	NULL	NULL	NULL	NULL	NULL	NULL	NULL	NULL	NULL	NULL	NULL	NULL	NULL	NULL	NULL	NULL	NULL	NULL	NULL
Nursing	Male	72	25.18	Lower GI	2021-03-19 09:03:16	2021-03-19 09:55:00	52	2021-03-19 09:40:35	15	2021-03-19 10:17:00	2021-03-19 10:24:49	7	2021-03-19 10:24:00	2021-03-19 11:09:00	81	45	1	0	0	0	0	1	1	0	0	1	0	4	NULL	NULL	NULL	NULL	NULL	NULL	NULL	NULL	NULL	NULL	NULL	NULL	NULL	NULL	NULL	NULL	NULL	NULL	NULL	NULL	NULL
Anesthesia	Male	72	25.18	Upper GI	2021-09-02 16:14:04	2021-09-02 16:25:00	11	2021-09-02 16:16:00	9	2021-09-02 16:33:00	2021-09-02 16:38:37	5	2021-09-02 16:48:00	2021-09-02 17:16:00	24	28	1	0	0	0	0	1	1	0	0	1	0	4	NULL	NULL	NULL	NULL	NULL	NULL	NULL	NULL	NULL	NULL	NULL	NULL	NULL	NULL	NULL	NULL	NULL	NULL	NULL	NULL	NULL
Nursing	Female	66	28.42	Upper GI	2021-02-16 07:36:46	2021-02-16 08:04:00	28	2021-02-16 07:55:00	9	2021-02-16 08:06:00	2021-02-16 08:09:04	3	2021-02-16 08:15:00	2021-02-16 09:00:00	33	45	0	0	0	0	0	0	0	1	0	0	0	1	NULL	NULL	NULL	NULL	NULL	NULL	NULL	NULL	NULL	NULL	NULL	NULL	NULL	NULL	NULL	NULL	NULL	NULL	NULL	NULL	NULL
Nursing	Male	52	36.02	Lower GI	2021-01-20 12:51:24	2021-01-20 13:01:00	10	2021-01-20 12:55:04	6	2021-01-20 13:26:00	2021-01-20 13:32:21	6	2021-01-20 13:38:00	2021-01-20 13:55:00	41	17	1	0	0	0	0	0	1	0	0	1	0	3	NULL	NULL	NULL	NULL	NULL	NULL	NULL	NULL	NULL	NULL	NULL	NULL	NULL	NULL	NULL	NULL	NULL	NULL	NULL	NULL	NULL
Nursing	Male	76	24.11	Upper GI	2020-06-04 15:01:21	2020-06-04 15:19:00	18	2020-06-04 15:15:49	4	2020-06-04 15:33:00	2020-06-04 15:34:46	1	2020-06-04 15:42:00	2020-06-04 16:13:00	33	31	0	0	0	0	0	1	0	1	0	0	0	2	NULL	NULL	NULL	NULL	NULL	NULL	NULL	NULL	NULL	NULL	NULL	NULL	NULL	NULL	NULL	NULL	NULL	NULL	NULL	NULL	NULL
Nursing	Female	74	21.14	Lower GI	2021-05-10 15:32:13	2021-05-10 16:00:00	28	2021-05-10 15:49:41	11	2021-05-10 16:49:00	2021-05-10 16:52:57	3	2021-05-10 16:55:00	2021-05-10 17:46:00	80	51	0	1	0	0	0	0	0	0	0	0	0	1	NULL	NULL	NULL	NULL	NULL	NULL	NULL	NULL	NULL	NULL	NULL	NULL	NULL	NULL	NULL	NULL	NULL	NULL	NULL	NULL	NULL
Nursing	Female	70	25.45	Lower GI	2020-10-13 07:33:37	2020-10-13 07:51:00	18	2020-10-13 07:45:23	6	2020-10-13 08:14:00	2020-10-13 08:15:32	1	2020-10-13 08:20:00	2020-10-13 09:18:00	42	58	0	0	0	0	0	0	1	0	0	1	0	2	NULL	NULL	NULL	NULL	NULL	NULL	NULL	NULL	NULL	NULL	NULL	NULL	NULL	NULL	NULL	NULL	NULL	NULL	NULL	NULL	NULL
Nursing	Female	78	24.9	DUAL	2020-07-28 15:20:25	2020-07-28 15:48:00	28	2020-07-28 15:41:00	7	2020-07-28 16:33:00	2020-07-28 16:34:50	1	2020-07-28 16:40:00	2020-07-28 17:23:00	74	43	1	1	0	1	0	1	0	0	0	0	0	4	NULL	NULL	NULL	NULL	NULL	NULL	NULL	NULL	NULL	NULL	NULL	NULL	NULL	NULL	NULL	NULL	NULL	NULL	NULL	NULL	NULL
Nursing	Male	49	30.85	DUAL	2020-02-04 13:47:32	2020-02-04 14:26:00	39	2020-02-04 14:11:35	15	2020-02-04 14:53:00	2020-02-04 15:07:03	14	2020-02-04 15:06:00	2020-02-04 16:25:00	80	79	0	0	0	0	0	0	0	1	0	0	0	1	NULL	NULL	NULL	NULL	NULL	NULL	NULL	NULL	NULL	NULL	NULL	NULL	NULL	NULL	NULL	NULL	NULL	NULL	NULL	NULL	NULL
Nursing	Male	50	32.28	Upper GI	2021-02-09 09:10:06	2021-02-09 09:49:00	39	2021-02-09 09:43:35	6	2021-02-09 09:58:00	2021-02-09 10:00:14	2	2021-02-09 10:05:00	2021-02-09 10:21:00	50	16	0	0	0	0	0	0	0	1	0	0	0	1	NULL	NULL	NULL	NULL	NULL	NULL	NULL	NULL	NULL	NULL	NULL	NULL	NULL	NULL	NULL	NULL	NULL	NULL	NULL	NULL	NULL
Nursing	Female	69	25.69	Lower GI	2020-10-08 09:48:40	2020-10-08 10:08:00	20	2020-10-08 10:01:00	7	2020-10-08 10:28:00	2020-10-08 10:30:29	2	2020-10-08 10:30:00	2020-10-08 11:45:00	42	75	1	1	0	0	0	0	0	0	0	0	0	2	NULL	NULL	NULL	NULL	NULL	NULL	NULL	NULL	NULL	NULL	NULL	NULL	NULL	NULL	NULL	NULL	NULL	NULL	NULL	NULL	NULL
Nursing	Male	64	29.7	Upper GI	2021-01-20 10:46:45	2021-01-20 11:10:00	24	2021-01-20 11:00:59	10	2021-01-20 11:14:00	2021-01-20 11:16:21	2	2021-01-20 11:28:00	2021-01-20 12:21:00	30	53	0	0	0	0	1	0	0	1	0	0	0	2	NULL	NULL	NULL	NULL	NULL	NULL	NULL	NULL	NULL	NULL	NULL	NULL	NULL	NULL	NULL	NULL	NULL	NULL	NULL	NULL	NULL
Nursing	Male	63	25.77	Upper GI	2020-07-08 10:38:27	2020-07-08 11:04:00	26	2020-07-08 10:56:41	8	2020-07-08 11:16:00	2020-07-08 11:20:04	4	2020-07-08 11:25:00	2020-07-08 12:08:00	42	43	0	0	0	0	1	0	0	1	0	0	0	2	NULL	NULL	NULL	NULL	NULL	NULL	NULL	NULL	NULL	NULL	NULL	NULL	NULL	NULL	NULL	NULL	NULL	NULL	NULL	NULL	NULL
Nursing	Female	72	29.7	DUAL	2020-10-29 11:07:54	2020-10-29 11:54:00	47	2020-10-29 11:45:00	9	2020-10-29 12:27:00	2020-10-29 12:29:42	2	2020-10-29 12:35:00	2020-10-29 13:19:00	82	44	1	0	0	1	0	1	0	0	0	0	0	3	NULL	NULL	NULL	NULL	NULL	NULL	NULL	NULL	NULL	NULL	NULL	NULL	NULL	NULL	NULL	NULL	NULL	NULL	NULL	NULL	NULL
Nursing	Female	77	33.15	Lower GI	2021-04-09 09:31:12	2021-04-09 09:45:00	14	2021-04-09 09:36:53	9	2021-04-09 10:17:00	2021-04-09 10:24:59	7	2021-04-09 10:25:00	2021-04-09 11:30:00	53	65	0	1	0	1	0	1	0	0	0	0	0	3	NULL	NULL	NULL	NULL	NULL	NULL	NULL	NULL	NULL	NULL	NULL	NULL	NULL	NULL	NULL	NULL	NULL	NULL	NULL	NULL	NULL
Nursing	Female	61	21.63	Lower GI	2021-04-07 09:21:18	2021-04-07 09:50:00	29	2021-04-07 09:44:54	6	2021-04-07 10:06:00	2021-04-07 10:08:54	2	2021-04-07 10:16:00	2021-04-07 10:41:00	47	25	NULL	NULL	NULL	NULL	NULL	NULL	NULL	NULL	NULL	NULL	NULL	0	NULL	NULL	NULL	NULL	NULL	NULL	NULL	NULL	NULL	NULL	NULL	NULL	NULL	NULL	NULL	NULL	NULL	NULL	NULL	NULL	NULL
Nursing	Male	49	30.17	DUAL	2020-03-10 14:08:48	2020-03-10 14:36:00	28	2020-03-10 14:25:16	11	2020-03-10 15:13:00	2020-03-10 15:20:12	7	2020-03-10 15:20:00	2020-03-10 16:30:00	72	70	0	0	0	1	0	0	0	1	0	0	0	2	NULL	NULL	NULL	NULL	NULL	NULL	NULL	NULL	NULL	NULL	NULL	NULL	NULL	NULL	NULL	NULL	NULL	NULL	NULL	NULL	NULL
Nursing	Male	67	22.42	Upper GI	2021-04-27 07:08:09	2021-04-27 07:25:00	17	2021-04-27 07:16:12	9	2021-04-27 07:33:00	2021-04-27 07:36:40	3	2021-04-27 07:43:00	2021-04-27 08:20:00	28	37	0	0	0	0	0	0	0	0	0	0	0	0	NULL	NULL	NULL	NULL	NULL	NULL	NULL	NULL	NULL	NULL	NULL	NULL	NULL	NULL	NULL	NULL	NULL	NULL	NULL	NULL	NULL
Nursing	Male	83	23.57	DUAL	2020-06-08 14:41:29	2020-06-08 15:18:00	37	2020-06-08 15:12:00	6	2020-06-08 16:11:00	2020-06-08 16:15:31	4	2020-06-08 16:22:00	2020-06-08 17:44:00	94	82	NULL	NULL	NULL	NULL	NULL	NULL	NULL	NULL	NULL	NULL	NULL	0	NULL	NULL	NULL	NULL	NULL	NULL	NULL	NULL	NULL	NULL	NULL	NULL	NULL	NULL	NULL	NULL	NULL	NULL	NULL	NULL	NULL
Nursing	Male	70	27.55	Lower GI	2021-04-01 16:09:42	2021-04-01 16:28:00	19	2021-04-01 16:19:08	9	2021-04-01 16:43:00	2021-04-01 16:49:51	6	2021-04-01 16:50:00	2021-04-01 17:22:00	40	32	0	0	0	1	0	1	1	1	0	1	0	5	NULL	NULL	NULL	NULL	NULL	NULL	NULL	NULL	NULL	NULL	NULL	NULL	NULL	NULL	NULL	NULL	NULL	NULL	NULL	NULL	NULL
Anesthesia	Male	79	30.68	Upper GI	2021-10-18 15:45:55	2021-10-18 16:03:00	18	2021-10-18 15:57:00	6	2021-10-18 16:13:00	2021-10-18 16:16:23	3	2021-10-18 16:20:00	2021-10-18 17:09:00	31	49	0	0	0	0	0	1	0	0	0	0	0	1	NULL	NULL	NULL	NULL	NULL	NULL	NULL	NULL	NULL	NULL	NULL	NULL	NULL	NULL	NULL	NULL	NULL	NULL	NULL	NULL	NULL
Anesthesia	Male	79	30.85	DUAL	2021-08-24 12:37:27	2021-08-24 13:26:00	49	2021-08-24 13:20:00	6	2021-08-24 14:01:00	2021-08-24 14:05:11	4	2021-08-24 14:08:00	2021-08-24 14:47:00	88	39	0	0	0	0	0	1	0	0	0	0	0	1	NULL	NULL	NULL	NULL	NULL	NULL	NULL	NULL	NULL	NULL	NULL	NULL	NULL	NULL	NULL	NULL	NULL	NULL	NULL	NULL	NULL
Nursing	Male	63	25.83	Lower GI	2020-06-10 14:27:32	2020-06-10 14:45:00	18	2020-06-10 14:36:44	9	2020-06-10 15:02:00	2020-06-10 15:04:37	2	2020-06-10 15:13:00	2020-06-10 15:28:00	37	15	1	0	0	0	0	0	0	0	0	0	0	1	NULL	NULL	NULL	NULL	NULL	NULL	NULL	NULL	NULL	NULL	NULL	NULL	NULL	NULL	NULL	NULL	NULL	NULL	NULL	NULL	NULL
Nursing	Female	49	31.93	Upper GI	2021-04-28 10:41:16	2021-04-28 10:57:00	16	2021-04-28 10:51:33	6	2021-04-28 11:00:00	2021-04-28 11:06:02	6	2021-04-28 11:10:00	2021-04-28 11:46:00	25	36	1	0	0	1	0	0	1	1	0	1	0	5	NULL	NULL	NULL	NULL	NULL	NULL	NULL	NULL	NULL	NULL	NULL	NULL	NULL	NULL	NULL	NULL	NULL	NULL	NULL	NULL	NULL
Nursing	Female	68	33.89	Lower GI	2021-04-28 10:18:57	2021-04-28 10:37:00	19	2021-04-28 10:22:00	15	2021-04-28 10:54:00	2021-04-28 10:58:21	4	2021-04-28 11:03:00	2021-04-28 12:04:00	40	61	0	0	0	1	0	0	0	0	0	0	0	1	NULL	NULL	NULL	NULL	NULL	NULL	NULL	NULL	NULL	NULL	NULL	NULL	NULL	NULL	NULL	NULL	NULL	NULL	NULL	NULL	NULL
Nursing	Male	68	27.41	Upper GI	2021-01-19 07:30:37	2021-01-19 07:48:00	18	2021-01-19 07:38:00	10	2021-01-19 07:55:00	2021-01-19 07:57:14	2	2021-01-19 08:06:00	2021-01-19 08:48:00	27	42	1	0	0	1	0	1	1	0	0	1	0	5	NULL	NULL	NULL	NULL	NULL	NULL	NULL	NULL	NULL	NULL	NULL	NULL	NULL	NULL	NULL	NULL	NULL	NULL	NULL	NULL	NULL
Nursing	Male	67	27.32	Lower GI	2020-01-22 07:31:44	2020-01-22 07:51:00	20	2020-01-22 07:38:11	13	2020-01-22 08:06:00	2020-01-22 08:10:13	4	2020-01-22 08:15:00	2020-01-22 08:47:00	39	32	1	0	0	1	0	1	1	0	0	1	0	5	NULL	NULL	NULL	NULL	NULL	NULL	NULL	NULL	NULL	NULL	NULL	NULL	NULL	NULL	NULL	NULL	NULL	NULL	NULL	NULL	NULL
Nursing	Male	64	26.39	Lower GI	2021-04-26 09:50:07	2021-04-26 10:35:00	45	2021-04-26 10:26:00	9	2021-04-26 10:54:00	2021-04-26 11:00:00	6	2021-04-26 11:04:00	2021-04-26 11:33:00	70	29	0	0	0	0	0	1	1	0	0	1	0	3	NULL	NULL	NULL	NULL	NULL	NULL	NULL	NULL	NULL	NULL	NULL	NULL	NULL	NULL	NULL	NULL	NULL	NULL	NULL	NULL	NULL
Nursing	Female	76	32.92	Lower GI	2021-03-25 12:44:33	2021-03-25 13:33:00	49	2021-03-25 13:26:00	7	2021-03-25 13:51:00	2021-03-25 13:54:57	3	2021-03-25 14:00:00	2021-03-25 16:04:00	70	124	0	0	0	0	0	1	0	0	0	0	0	1	NULL	NULL	NULL	NULL	NULL	NULL	NULL	NULL	NULL	NULL	NULL	NULL	NULL	NULL	NULL	NULL	NULL	NULL	NULL	NULL	NULL
Nursing	Male	71	26.58	Lower GI	2021-04-28 07:43:35	2021-04-28 08:09:00	26	2021-04-28 08:03:00	6	2021-04-28 08:16:00	2021-04-28 08:18:49	2	2021-04-28 08:27:00	2021-04-28 08:48:00	35	21	0	0	0	1	0	1	0	0	0	0	0	2	NULL	NULL	NULL	NULL	NULL	NULL	NULL	NULL	NULL	NULL	NULL	NULL	NULL	NULL	NULL	NULL	NULL	NULL	NULL	NULL	NULL
Nursing	Female	73	31.09	Upper GI	2020-01-20 10:37:48	2020-01-20 11:05:00	28	2020-01-20 10:52:21	13	2020-01-20 11:10:00	2020-01-20 11:15:03	5	2020-01-20 11:21:00	2020-01-20 12:18:00	38	57	1	0	0	1	0	1	0	0	0	0	0	3	NULL	NULL	NULL	NULL	NULL	NULL	NULL	NULL	NULL	NULL	NULL	NULL	NULL	NULL	NULL	NULL	NULL	NULL	NULL	NULL	NULL
Nursing	Male	49	22.71	Lower GI	2021-02-08 14:56:39	2021-02-08 15:31:00	35	2021-02-08 15:22:00	9	2021-02-08 15:44:00	2021-02-08 15:46:27	2	2021-02-08 15:55:00	2021-02-08 16:36:00	50	41	NULL	NULL	NULL	NULL	NULL	NULL	NULL	NULL	NULL	NULL	NULL	0	NULL	NULL	NULL	NULL	NULL	NULL	NULL	NULL	NULL	NULL	NULL	NULL	NULL	NULL	NULL	NULL	NULL	NULL	NULL	NULL	NULL
Nursing	Male	66	17.54	Lower GI	2020-10-07 06:54:40	2020-10-07 07:42:00	48	2020-10-07 07:37:46	5	2020-10-07 07:50:00	2020-10-07 07:56:07	6	2020-10-07 08:00:00	2020-10-07 09:21:00	62	81	0	1	0	0	0	0	1	0	0	1	0	3	NULL	NULL	NULL	NULL	NULL	NULL	NULL	NULL	NULL	NULL	NULL	NULL	NULL	NULL	NULL	NULL	NULL	NULL	NULL	NULL	NULL
Nursing	Male	56	17.08	Lower GI	2021-06-24 12:38:50	2021-06-24 13:00:00	22	2021-06-15 13:19:00	12941	2021-06-24 13:13:00	2021-06-24 13:20:28	7	2021-06-24 07:00:00	2021-06-24 14:36:00	42	456	0	0	0	0	0	0	1	0	0	1	0	2	NULL	NULL	NULL	NULL	NULL	NULL	NULL	NULL	NULL	NULL	NULL	NULL	NULL	NULL	NULL	NULL	NULL	NULL	NULL	NULL	NULL
Anesthesia	Male	68	24.39	Lower GI	2021-08-31 11:04:27	2021-08-31 11:08:00	4	2021-08-31 11:03:00	5	2021-08-31 11:23:00	2021-08-31 11:24:30	1	2021-08-31 11:30:00	2021-08-31 11:52:00	20	22	0	0	0	0	0	1	0	1	0	0	0	2	NULL	NULL	NULL	NULL	NULL	NULL	NULL	NULL	NULL	NULL	NULL	NULL	NULL	NULL	NULL	NULL	NULL	NULL	NULL	NULL	NULL
Nursing	Male	52	23.17	Lower GI	2021-06-16 11:08:00	2021-06-16 11:25:00	17	2021-06-16 11:13:00	12	2021-06-16 11:36:00	2021-06-16 11:47:09	11	2021-06-16 11:45:00	2021-06-16 11:52:00	39	7	NULL	NULL	NULL	NULL	NULL	NULL	NULL	NULL	NULL	NULL	NULL	0	NULL	NULL	NULL	NULL	NULL	NULL	NULL	NULL	NULL	NULL	NULL	NULL	NULL	NULL	NULL	NULL	NULL	NULL	NULL	NULL	NULL
Nursing	Female	67	27.4	Lower GI	2020-12-30 11:09:35	2020-12-30 11:20:00	11	2020-12-30 11:13:30	7	2020-12-30 11:34:00	2020-12-30 11:40:00	6	2020-12-30 11:45:00	2020-12-30 12:47:00	31	62	0	1	0	1	0	0	0	0	0	0	0	2	NULL	NULL	NULL	NULL	NULL	NULL	NULL	NULL	NULL	NULL	NULL	NULL	NULL	NULL	NULL	NULL	NULL	NULL	NULL	NULL	NULL
Nursing	Female	72	24.13	Lower GI	2021-03-17 12:45:39	2021-03-17 13:33:00	48	2021-03-17 13:23:22	10	2021-03-17 13:51:00	2021-03-17 13:54:33	3	2021-03-17 13:59:00	2021-03-17 14:28:00	69	29	0	0	0	1	0	1	0	0	0	0	0	2	NULL	NULL	NULL	NULL	NULL	NULL	NULL	NULL	NULL	NULL	NULL	NULL	NULL	NULL	NULL	NULL	NULL	NULL	NULL	NULL	NULL
Nursing	Female	74	26.75	Lower GI	2020-01-20 08:23:34	2020-01-20 08:43:00	20	2020-01-20 08:36:00	7	2020-01-20 08:58:00	2020-01-20 09:00:00	2	2020-01-20 09:04:00	2020-01-20 10:23:00	37	79	1	0	0	0	0	1	0	0	0	0	0	2	NULL	NULL	NULL	NULL	NULL	NULL	NULL	NULL	NULL	NULL	NULL	NULL	NULL	NULL	NULL	NULL	NULL	NULL	NULL	NULL	NULL
Nursing	Male	74	NULL	Upper GI	2020-07-10 14:40:00	2020-07-10 14:59:00	19	2020-07-10 14:50:00	9	2020-07-10 16:00:00	2020-07-10 16:03:00	3	2020-07-10 16:09:00	2020-07-10 16:25:00	83	16	0	0	0	1	0	0	0	0	0	0	0	1	NULL	NULL	NULL	NULL	NULL	NULL	NULL	NULL	NULL	NULL	NULL	NULL	NULL	NULL	NULL	NULL	NULL	NULL	NULL	NULL	NULL
Anesthesia	Male	69	23.15	Lower GI	2021-08-31 13:14:19	2021-08-31 13:18:00	4	2021-08-31 13:14:00	4	2021-08-31 13:50:00	2021-08-31 13:53:09	3	2021-08-31 13:57:00	2021-08-31 14:30:00	39	33	NULL	NULL	NULL	NULL	NULL	NULL	NULL	NULL	NULL	NULL	NULL	0	NULL	NULL	NULL	NULL	NULL	NULL	NULL	NULL	NULL	NULL	NULL	NULL	NULL	NULL	NULL	NULL	NULL	NULL	NULL	NULL	NULL
Nursing	Male	78	30.26	Upper GI	2021-03-25 16:10:10	2021-03-25 16:51:00	41	2021-03-25 16:43:10	8	2021-03-25 16:56:00	2021-03-25 17:01:56	5	2021-03-25 17:07:00	2021-03-25 17:42:00	51	35	0	1	0	0	0	1	0	0	0	0	0	2	NULL	NULL	NULL	NULL	NULL	NULL	NULL	NULL	NULL	NULL	NULL	NULL	NULL	NULL	NULL	NULL	NULL	NULL	NULL	NULL	NULL
Nursing	Male	57	24.78	DUAL	2021-05-18 15:19:22	2021-05-18 16:23:00	64	2021-05-18 16:08:00	15	2021-05-18 16:51:00	2021-05-18 16:55:50	4	2021-05-18 17:00:00	2021-05-18 17:33:00	96	33	0	0	0	0	0	0	0	1	0	0	0	1	NULL	NULL	NULL	NULL	NULL	NULL	NULL	NULL	NULL	NULL	NULL	NULL	NULL	NULL	NULL	NULL	NULL	NULL	NULL	NULL	NULL
Nursing	Female	74	25.97	Upper GI	2020-09-02 15:56:09	2020-09-02 16:47:00	51	2020-09-02 16:36:09	11	2020-09-02 17:03:00	2020-09-02 17:13:09	10	2020-09-02 17:18:00	2020-09-02 18:42:00	77	84	0	0	0	1	0	1	0	0	0	0	0	2	NULL	NULL	NULL	NULL	NULL	NULL	NULL	NULL	NULL	NULL	NULL	NULL	NULL	NULL	NULL	NULL	NULL	NULL	NULL	NULL	NULL
Nursing	Female	77	28.35	Lower GI	2021-05-06 12:16:34	2021-05-06 12:56:00	40	2021-05-06 12:45:44	11	2021-05-06 13:08:00	2021-05-06 13:13:56	5	2021-05-06 13:18:00	2021-05-06 13:50:00	57	32	0	0	0	1	0	1	0	0	0	0	0	2	NULL	NULL	NULL	NULL	NULL	NULL	NULL	NULL	NULL	NULL	NULL	NULL	NULL	NULL	NULL	NULL	NULL	NULL	NULL	NULL	NULL
Nursing	Female	70	17.38	Lower GI	2020-02-24 07:35:55	2020-02-24 07:57:00	22	2020-02-24 07:53:20	4	2020-02-24 08:19:00	2020-02-24 08:23:31	4	2020-02-24 08:33:00	2020-02-24 09:19:00	48	46	NULL	NULL	NULL	NULL	NULL	NULL	NULL	NULL	NULL	NULL	NULL	0	NULL	NULL	NULL	NULL	NULL	NULL	NULL	NULL	NULL	NULL	NULL	NULL	NULL	NULL	NULL	NULL	NULL	NULL	NULL	NULL	NULL
Nursing	Female	58	34.18	Upper GI	2020-03-04 10:24:32	2020-03-04 10:45:00	21	2020-03-04 10:36:10	9	2020-03-04 10:47:00	2020-03-04 10:50:00	3	2020-03-04 10:54:00	2020-03-04 11:35:00	26	41	0	0	0	0	0	0	1	1	1	1	0	4	NULL	NULL	NULL	NULL	NULL	NULL	NULL	NULL	NULL	NULL	NULL	NULL	NULL	NULL	NULL	NULL	NULL	NULL	NULL	NULL	NULL
Nursing	Female	74	30.67	Lower GI	2020-09-08 07:17:02	2020-09-08 08:07:00	50	2020-09-08 07:59:21	8	2020-09-08 08:44:00	2020-09-08 08:47:25	3	2020-09-08 08:54:00	2020-09-08 09:49:00	90	55	0	0	1	0	0	1	1	0	0	1	0	4	NULL	NULL	NULL	NULL	NULL	NULL	NULL	NULL	NULL	NULL	NULL	NULL	NULL	NULL	NULL	NULL	NULL	NULL	NULL	NULL	NULL
Nursing	Female	66	31.31	Upper GI	2020-01-24 16:07:47	2020-01-24 17:02:00	55	2020-01-24 16:50:00	12	2020-01-24 17:06:00	2020-01-24 17:15:00	9	2020-01-24 17:25:00	2020-01-24 18:00:00	68	35	0	0	0	0	0	0	1	0	0	1	0	2	NULL	NULL	NULL	NULL	NULL	NULL	NULL	NULL	NULL	NULL	NULL	NULL	NULL	NULL	NULL	NULL	NULL	NULL	NULL	NULL	NULL
Anesthesia	Male	75	27.89	Lower GI	2021-10-20 08:25:19	2021-10-20 08:32:00	7	2021-10-20 08:24:00	8	2021-10-20 08:44:00	2021-10-20 08:47:05	3	2021-10-20 08:51:00	2021-10-20 09:00:00	22	9	0	0	0	0	0	1	0	0	0	0	0	1	NULL	NULL	NULL	NULL	NULL	NULL	NULL	NULL	NULL	NULL	NULL	NULL	NULL	NULL	NULL	NULL	NULL	NULL	NULL	NULL	NULL
Anesthesia	Male	67	35.44	Lower GI	2021-09-23 09:27:05	2021-09-23 09:39:00	12	2021-09-23 09:27:00	12	2021-09-23 10:07:00	2021-09-23 10:15:00	8	2021-09-23 10:15:00	2021-09-23 10:56:00	48	41	1	0	0	0	0	0	0	1	0	0	0	2	NULL	NULL	NULL	NULL	NULL	NULL	NULL	NULL	NULL	NULL	NULL	NULL	NULL	NULL	NULL	NULL	NULL	NULL	NULL	NULL	NULL
Nursing	Male	72	26.39	Lower GI	2021-06-29 09:28:44	2021-06-29 10:00:00	32	2021-06-29 09:52:35	8	2021-06-29 10:15:00	2021-06-29 10:18:00	3	2021-06-29 10:23:00	2021-06-29 11:05:00	50	42	0	0	0	0	0	0	1	1	0	1	0	3	NULL	NULL	NULL	NULL	NULL	NULL	NULL	NULL	NULL	NULL	NULL	NULL	NULL	NULL	NULL	NULL	NULL	NULL	NULL	NULL	NULL
Nursing	Male	75	27.6	Lower GI	2020-02-14 10:27:09	2020-02-14 10:52:00	25	2020-02-14 10:34:00	18	2020-02-14 11:24:00	2020-02-14 11:28:56	4	2020-02-14 11:33:00	2020-02-14 12:50:00	61	77	0	0	0	0	0	1	0	0	0	0	0	1	NULL	NULL	NULL	NULL	NULL	NULL	NULL	NULL	NULL	NULL	NULL	NULL	NULL	NULL	NULL	NULL	NULL	NULL	NULL	NULL	NULL
Anesthesia	Male	49	32.55	Lower GI	2021-08-16 16:40:24	2021-08-16 16:47:00	7	2021-08-16 16:39:00	8	2021-08-16 17:03:00	2021-08-16 17:08:50	5	2021-08-16 17:11:00	2021-08-16 17:20:00	28	9	NULL	NULL	NULL	NULL	NULL	NULL	NULL	NULL	NULL	NULL	NULL	0	NULL	NULL	NULL	NULL	NULL	NULL	NULL	NULL	NULL	NULL	NULL	NULL	NULL	NULL	NULL	NULL	NULL	NULL	NULL	NULL	NULL
Nursing	Female	52	21.16	DUAL	2021-05-03 13:34:47	2021-05-03 13:55:00	21	2021-05-03 13:44:00	11	2021-05-03 14:21:00	2021-05-03 14:25:08	4	2021-05-03 14:32:00	2021-05-03 16:21:00	51	109	0	1	0	0	0	0	0	0	0	0	0	1	NULL	NULL	NULL	NULL	NULL	NULL	NULL	NULL	NULL	NULL	NULL	NULL	NULL	NULL	NULL	NULL	NULL	NULL	NULL	NULL	NULL
Nursing	Female	62	27.37	Lower GI	2020-06-08 09:35:47	2020-06-08 09:54:00	19	2020-06-08 09:42:54	12	2020-06-08 10:07:00	2020-06-08 10:11:58	4	2020-06-08 10:15:00	2020-06-08 11:38:00	36	83	0	0	0	0	0	1	0	0	0	0	0	1	NULL	NULL	NULL	NULL	NULL	NULL	NULL	NULL	NULL	NULL	NULL	NULL	NULL	NULL	NULL	NULL	NULL	NULL	NULL	NULL	NULL
Nursing	Female	63	22.47	Lower GI	2020-10-14 11:23:23	2020-10-14 11:36:00	13	2020-10-14 11:27:00	9	2020-10-14 12:00:00	2020-10-14 12:03:46	3	2020-10-14 12:09:00	2020-10-14 12:27:00	40	18	NULL	NULL	NULL	NULL	NULL	NULL	NULL	NULL	NULL	NULL	NULL	0	NULL	NULL	NULL	NULL	NULL	NULL	NULL	NULL	NULL	NULL	NULL	NULL	NULL	NULL	NULL	NULL	NULL	NULL	NULL	NULL	NULL
Nursing	Male	54	27.71	Lower GI	2020-10-29 06:59:11	2020-10-29 07:10:00	11	2020-10-29 07:04:31	6	2020-10-29 07:26:00	2020-10-29 07:28:29	2	2020-10-29 07:34:00	2020-10-29 08:06:00	29	32	NULL	NULL	NULL	NULL	NULL	NULL	NULL	NULL	NULL	NULL	NULL	0	NULL	NULL	NULL	NULL	NULL	NULL	NULL	NULL	NULL	NULL	NULL	NULL	NULL	NULL	NULL	NULL	NULL	NULL	NULL	NULL	NULL
Nursing	Female	67	18.07	Lower GI	2020-09-15 08:15:00	2020-09-15 09:07:00	52	2020-09-15 08:58:00	9	2020-09-15 09:25:00	2020-09-15 09:28:08	3	2020-09-15 09:30:00	2020-09-15 09:45:00	73	15	0	0	0	0	0	1	0	0	0	0	0	1	NULL	NULL	NULL	NULL	NULL	NULL	NULL	NULL	NULL	NULL	NULL	NULL	NULL	NULL	NULL	NULL	NULL	NULL	NULL	NULL	NULL
Nursing	Female	74	30.51	Upper GI	2020-06-02 09:13:58	2020-06-02 09:45:00	32	2020-06-02 09:37:00	8	2020-06-02 09:50:00	2020-06-02 09:52:44	2	2020-06-02 09:54:00	2020-06-02 11:03:00	39	69	0	1	0	0	0	1	1	1	0	1	0	5	NULL	NULL	NULL	NULL	NULL	NULL	NULL	NULL	NULL	NULL	NULL	NULL	NULL	NULL	NULL	NULL	NULL	NULL	NULL	NULL	NULL
Nursing	Female	77	25.06	Upper GI	2021-01-13 16:48:00	2021-01-13 17:09:00	21	2021-01-13 17:01:00	8	2021-01-13 17:14:00	2021-01-13 17:18:21	4	2021-01-13 17:23:00	2021-01-13 17:59:00	30	36	0	0	0	1	0	0	0	0	0	0	0	1	NULL	NULL	NULL	NULL	NULL	NULL	NULL	NULL	NULL	NULL	NULL	NULL	NULL	NULL	NULL	NULL	NULL	NULL	NULL	NULL	NULL
Nursing	Male	74	28.98	Lower GI	2021-03-23 10:58:40	2021-03-23 11:35:00	37	2021-03-23 11:31:00	4	2021-03-23 11:56:00	2021-03-23 11:57:50	1	2021-03-23 12:04:00	2021-03-23 12:44:00	59	40	1	0	0	1	0	1	0	0	0	0	0	3	NULL	NULL	NULL	NULL	NULL	NULL	NULL	NULL	NULL	NULL	NULL	NULL	NULL	NULL	NULL	NULL	NULL	NULL	NULL	NULL	NULL
Nursing	Female	80	24.04	Upper GI	2020-09-02 09:09:38	2020-09-02 09:35:00	26	2020-09-02 09:27:00	8	2020-09-02 09:39:00	2020-09-02 09:42:34	3	2020-09-02 09:50:00	2020-09-02 10:39:00	33	49	0	0	0	1	0	1	0	0	0	0	0	2	NULL	NULL	NULL	NULL	NULL	NULL	NULL	NULL	NULL	NULL	NULL	NULL	NULL	NULL	NULL	NULL	NULL	NULL	NULL	NULL	NULL
Nursing	Male	68	24.11	Lower GI	2020-02-03 10:16:44	2020-02-03 10:50:00	34	2020-02-03 10:39:58	11	2020-02-03 11:21:00	2020-02-03 11:23:07	2	2020-02-03 11:25:00	2020-02-03 12:31:00	67	66	NULL	NULL	NULL	NULL	NULL	NULL	NULL	NULL	NULL	NULL	NULL	0	NULL	NULL	NULL	NULL	NULL	NULL	NULL	NULL	NULL	NULL	NULL	NULL	NULL	NULL	NULL	NULL	NULL	NULL	NULL	NULL	NULL
Nursing	Male	68	22.24	Upper GI	2020-03-02 14:15:48	2020-03-02 14:42:00	27	2020-03-02 14:28:31	14	2020-03-02 14:50:00	2020-03-02 14:53:32	3	2020-03-02 14:59:00	2020-03-02 15:40:00	38	41	NULL	NULL	NULL	NULL	NULL	NULL	NULL	NULL	NULL	NULL	NULL	0	NULL	NULL	NULL	NULL	NULL	NULL	NULL	NULL	NULL	NULL	NULL	NULL	NULL	NULL	NULL	NULL	NULL	NULL	NULL	NULL	NULL
Nursing	Female	80	25.58	Upper GI	2020-03-04 09:56:37	2020-03-04 10:34:00	38	2020-03-04 10:26:33	8	2020-03-04 10:37:00	2020-03-04 10:39:15	2	2020-03-04 10:47:00	2020-03-04 11:20:00	43	33	0	0	0	0	0	1	0	0	0	0	0	1	NULL	NULL	NULL	NULL	NULL	NULL	NULL	NULL	NULL	NULL	NULL	NULL	NULL	NULL	NULL	NULL	NULL	NULL	NULL	NULL	NULL
Nursing	Female	67	23.11	Lower GI	2020-06-15 10:19:07	2020-06-15 10:58:00	39	2020-06-15 10:42:00	16	2020-06-15 11:15:00	2020-06-15 11:17:45	2	2020-06-15 11:23:00	2020-06-15 11:39:00	58	16	0	0	0	0	0	1	0	0	0	0	0	1	NULL	NULL	NULL	NULL	NULL	NULL	NULL	NULL	NULL	NULL	NULL	NULL	NULL	NULL	NULL	NULL	NULL	NULL	NULL	NULL	NULL
Nursing	Female	67	25.86	Upper GI	2021-05-24 07:01:02	2021-05-24 07:48:00	47	2021-05-24 07:39:10	9	2021-05-24 07:50:00	2021-05-24 07:57:36	7	2021-05-24 08:05:00	2021-05-24 08:29:00	56	24	0	1	0	0	0	1	0	1	0	0	0	3	NULL	NULL	NULL	NULL	NULL	NULL	NULL	NULL	NULL	NULL	NULL	NULL	NULL	NULL	NULL	NULL	NULL	NULL	NULL	NULL	NULL
Anesthesia	Female	66	26.46	Lower GI	2021-08-17 15:27:40	2021-08-17 15:37:00	10	2021-08-17 15:31:00	6	2021-08-17 15:57:00	2021-08-17 16:02:54	5	2021-08-17 16:00:00	2021-08-17 17:00:00	35	60	NULL	NULL	NULL	NULL	NULL	NULL	NULL	NULL	NULL	NULL	NULL	0	NULL	NULL	NULL	NULL	NULL	NULL	NULL	NULL	NULL	NULL	NULL	NULL	NULL	NULL	NULL	NULL	NULL	NULL	NULL	NULL	NULL
Anesthesia	Female	50	26.61	Lower GI	2021-08-24 16:51:18	2021-08-24 16:57:00	6	2021-08-24 16:49:00	8	2021-08-24 17:21:00	2021-08-24 17:23:44	2	2021-08-24 17:26:00	2021-08-24 18:00:00	32	34	1	1	0	0	0	0	0	0	0	0	0	2	NULL	NULL	NULL	NULL	NULL	NULL	NULL	NULL	NULL	NULL	NULL	NULL	NULL	NULL	NULL	NULL	NULL	NULL	NULL	NULL	NULL
Nursing	Male	76	22.47	Lower GI	2020-10-26 16:05:11	2020-10-26 16:23:00	18	2020-10-26 16:17:19	6	2020-10-26 16:41:00	2020-10-26 16:43:39	2	2020-10-26 16:45:00	2020-10-26 17:31:00	38	46	1	0	0	1	0	1	0	0	0	0	0	3	NULL	NULL	NULL	NULL	NULL	NULL	NULL	NULL	NULL	NULL	NULL	NULL	NULL	NULL	NULL	NULL	NULL	NULL	NULL	NULL	NULL
Nursing	Male	62	24.95	Upper GI	2020-01-07 06:37:41	2020-01-07 07:18:00	41	2020-01-07 07:12:00	6	2020-01-07 07:23:00	2020-01-07 07:25:03	2	2020-01-07 07:30:00	2020-01-07 08:11:00	48	41	0	0	0	0	0	0	0	1	0	0	0	1	NULL	NULL	NULL	NULL	NULL	NULL	NULL	NULL	NULL	NULL	NULL	NULL	NULL	NULL	NULL	NULL	NULL	NULL	NULL	NULL	NULL
Nursing	Male	63	29.84	Upper GI	2021-04-20 11:35:00	2021-04-20 12:12:00	37	2021-04-20 11:58:00	14	2021-04-20 12:15:00	2021-04-20 12:20:00	5	2021-04-20 12:30:00	2021-04-20 12:56:00	45	26	0	0	0	0	0	0	0	1	0	0	0	1	NULL	NULL	NULL	NULL	NULL	NULL	NULL	NULL	NULL	NULL	NULL	NULL	NULL	NULL	NULL	NULL	NULL	NULL	NULL	NULL	NULL
Nursing	Male	57	25.06	Lower GI	2021-06-04 08:58:24	2021-06-04 09:12:00	14	2021-06-04 09:03:00	9	2021-06-04 09:27:00	2021-06-04 09:28:53	1	2021-06-04 09:35:00	2021-06-04 09:43:00	30	8	0	0	0	0	0	1	0	0	0	0	0	1	NULL	NULL	NULL	NULL	NULL	NULL	NULL	NULL	NULL	NULL	NULL	NULL	NULL	NULL	NULL	NULL	NULL	NULL	NULL	NULL	NULL
Nursing	Female	63	27.17	Upper GI	2020-02-21 10:30:25	2020-02-21 10:50:00	20	2020-02-20 23:53:00	657	2020-02-21 10:56:00	2020-02-21 11:01:41	5	2020-02-21 11:10:00	2020-02-21 12:00:00	31	50	1	1	1	1	0	1	0	1	0	0	0	6	NULL	NULL	NULL	NULL	NULL	NULL	NULL	NULL	NULL	NULL	NULL	NULL	NULL	NULL	NULL	NULL	NULL	NULL	NULL	NULL	NULL
Nursing	Female	63	25.39	DUAL	2020-06-30 15:41:47	2020-06-30 16:08:00	27	2020-06-30 16:02:56	6	2020-06-30 16:36:00	2020-06-30 16:42:13	6	2020-06-30 16:47:00	2020-06-30 17:31:00	61	44	1	1	1	1	0	1	0	1	0	0	0	6	NULL	NULL	NULL	NULL	NULL	NULL	NULL	NULL	NULL	NULL	NULL	NULL	NULL	NULL	NULL	NULL	NULL	NULL	NULL	NULL	NULL
Nursing	Male	61	23.95	Lower GI	2020-01-21 06:40:52	2020-01-21 07:22:00	42	2020-01-21 07:10:48	12	2020-01-21 07:41:00	2020-01-21 07:44:34	3	2020-01-21 07:50:00	2020-01-21 08:05:00	64	15	0	0	0	0	0	1	0	1	0	0	0	2	NULL	NULL	NULL	NULL	NULL	NULL	NULL	NULL	NULL	NULL	NULL	NULL	NULL	NULL	NULL	NULL	NULL	NULL	NULL	NULL	NULL
Nursing	Female	72	46.48	Lower GI	2021-02-01 07:25:10	2021-02-01 07:50:00	25	2021-02-01 07:34:25	16	2021-02-01 08:15:00	2021-02-01 08:20:43	5	2021-02-01 08:24:00	2021-02-01 08:51:00	55	27	0	0	0	0	0	1	0	1	0	0	1	3	NULL	NULL	NULL	NULL	NULL	NULL	NULL	NULL	NULL	NULL	NULL	NULL	NULL	NULL	NULL	NULL	NULL	NULL	NULL	NULL	NULL
Nursing	Male	59	25.85	Upper GI	2020-06-02 10:37:14	2020-06-02 10:49:00	12	2020-06-02 10:43:14	6	2020-06-02 10:54:00	2020-06-02 10:57:29	3	2020-06-02 11:15:00	2020-06-02 12:15:00	20	60	0	0	0	1	1	0	0	1	0	0	0	3	NULL	NULL	NULL	NULL	NULL	NULL	NULL	NULL	NULL	NULL	NULL	NULL	NULL	NULL	NULL	NULL	NULL	NULL	NULL	NULL	NULL
Nursing	Male	59	28.19	Upper GI	2020-09-15 11:37:56	2020-09-15 12:00:00	23	2020-09-15 11:57:22	3	2020-09-15 12:04:00	2020-09-15 12:11:22	7	2020-09-15 12:15:00	2020-09-15 13:00:00	34	45	0	0	0	1	1	0	0	1	0	0	0	3	NULL	NULL	NULL	NULL	NULL	NULL	NULL	NULL	NULL	NULL	NULL	NULL	NULL	NULL	NULL	NULL	NULL	NULL	NULL	NULL	NULL
Nursing	Female	67	23.17	Lower GI	2020-02-04 08:30:30	2020-02-04 08:56:00	26	2020-02-04 08:49:18	7	2020-02-04 09:10:00	2020-02-04 09:11:31	1	2020-02-04 09:15:00	2020-02-04 09:45:00	41	30	0	1	0	0	0	1	0	0	0	0	0	2	NULL	NULL	NULL	NULL	NULL	NULL	NULL	NULL	NULL	NULL	NULL	NULL	NULL	NULL	NULL	NULL	NULL	NULL	NULL	NULL	NULL
Anesthesia	Female	68	20.6	Lower GI	2021-09-08 07:58:06	2021-09-08 08:02:00	4	2021-09-08 07:56:00	6	2021-09-08 08:14:00	2021-09-08 08:16:00	2	2021-09-08 08:27:00	2021-09-08 09:00:00	18	33	NULL	NULL	NULL	NULL	NULL	NULL	NULL	NULL	NULL	NULL	NULL	0	NULL	NULL	NULL	NULL	NULL	NULL	NULL	NULL	NULL	NULL	NULL	NULL	NULL	NULL	NULL	NULL	NULL	NULL	NULL	NULL	NULL
Nursing	Male	75	28.96	Lower GI	2020-02-06 09:12:50	2020-02-06 09:38:00	26	2020-02-06 09:27:07	11	2020-02-06 09:52:00	2020-02-06 09:55:50	3	2020-02-06 10:00:00	2020-02-06 10:29:00	43	29	1	0	0	1	0	0	1	0	0	1	0	4	NULL	NULL	NULL	NULL	NULL	NULL	NULL	NULL	NULL	NULL	NULL	NULL	NULL	NULL	NULL	NULL	NULL	NULL	NULL	NULL	NULL
Nursing	Male	78	24.37	Lower GI	2021-05-26 15:33:24	2021-05-26 15:59:00	26	2021-05-26 15:51:00	8	2021-05-26 16:48:00	2021-05-26 16:50:01	2	2021-05-26 16:56:00	2021-05-26 17:35:00	77	39	NULL	NULL	NULL	NULL	NULL	NULL	NULL	NULL	NULL	NULL	NULL	0	NULL	NULL	NULL	NULL	NULL	NULL	NULL	NULL	NULL	NULL	NULL	NULL	NULL	NULL	NULL	NULL	NULL	NULL	NULL	NULL	NULL
Anesthesia	Female	73	34.22	Lower GI	2021-08-17 07:31:07	2021-08-17 07:34:00	3	2021-08-17 07:28:00	6	2021-08-17 08:04:00	2021-08-17 08:07:52	3	2021-08-17 08:15:00	2021-08-17 08:45:00	36	30	0	0	0	1	0	1	1	0	0	1	0	4	NULL	NULL	NULL	NULL	NULL	NULL	NULL	NULL	NULL	NULL	NULL	NULL	NULL	NULL	NULL	NULL	NULL	NULL	NULL	NULL	NULL
Nursing	Female	66	20.98	Upper GI	2021-02-18 08:57:41	2021-02-18 09:38:00	41	2021-02-18 09:31:00	7	2021-02-18 09:42:00	2021-02-18 09:44:59	2	2021-02-18 09:50:00	2021-02-18 10:31:00	47	41	0	0	0	1	0	0	0	0	0	0	0	1	NULL	NULL	NULL	NULL	NULL	NULL	NULL	NULL	NULL	NULL	NULL	NULL	NULL	NULL	NULL	NULL	NULL	NULL	NULL	NULL	NULL
Nursing	Female	71	26.95	Lower GI	2020-03-02 13:08:34	2020-03-02 13:19:00	11	2020-03-02 13:12:06	7	2020-03-02 13:54:00	2020-03-02 13:56:30	2	2020-03-02 14:02:00	2020-03-02 14:40:00	48	38	1	0	0	1	0	0	0	0	0	0	0	2	NULL	NULL	NULL	NULL	NULL	NULL	NULL	NULL	NULL	NULL	NULL	NULL	NULL	NULL	NULL	NULL	NULL	NULL	NULL	NULL	NULL
Nursing	Female	47	32.61	Upper GI	2021-03-17 15:14:32	2021-03-17 15:42:00	28	2021-03-17 15:30:00	12	2021-03-17 15:52:00	2021-03-17 16:00:57	8	2021-03-17 16:07:00	2021-03-17 16:24:00	46	17	0	1	0	0	0	0	0	0	0	0	0	1	NULL	NULL	NULL	NULL	NULL	NULL	NULL	NULL	NULL	NULL	NULL	NULL	NULL	NULL	NULL	NULL	NULL	NULL	NULL	NULL	NULL
Anesthesia	Male	86	20.36	Lower GI	2021-10-15 14:20:04	2021-10-15 14:28:00	8	2021-10-15 14:17:00	11	2021-10-15 14:46:00	2021-10-15 14:50:17	4	2021-10-15 14:55:00	2021-10-15 15:45:00	30	50	0	0	0	1	0	1	1	0	0	1	0	4	NULL	NULL	NULL	NULL	NULL	NULL	NULL	NULL	NULL	NULL	NULL	NULL	NULL	NULL	NULL	NULL	NULL	NULL	NULL	NULL	NULL
Nursing	Male	46	NULL	Lower GI	2020-01-24 09:05:31	2020-01-24 09:23:00	18	2020-01-24 09:17:46	6	2020-01-24 09:40:00	2020-01-24 09:44:50	4	2020-01-24 09:42:00	2020-01-24 10:39:00	39	57	1	0	0	0	0	0	1	0	0	1	0	3	NULL	NULL	NULL	NULL	NULL	NULL	NULL	NULL	NULL	NULL	NULL	NULL	NULL	NULL	NULL	NULL	NULL	NULL	NULL	NULL	NULL
Nursing	Female	72	24.05	Lower GI	2021-01-13 11:22:00	2021-01-13 11:49:00	27	2021-01-13 11:42:00	7	2021-01-13 12:00:00	2021-01-13 12:05:00	5	2021-01-13 12:15:00	2021-01-13 12:45:00	43	30	0	0	0	0	0	0	0	1	0	0	0	1	NULL	NULL	NULL	NULL	NULL	NULL	NULL	NULL	NULL	NULL	NULL	NULL	NULL	NULL	NULL	NULL	NULL	NULL	NULL	NULL	NULL
Nursing	Male	71	22.67	Lower GI	2021-02-02 11:48:10	2021-02-02 12:21:00	33	2021-02-02 12:13:23	8	2021-02-02 12:38:00	2021-02-02 12:41:12	3	2021-02-02 12:45:00	2021-02-02 13:16:00	53	31	0	0	0	1	0	1	0	0	0	0	0	2	NULL	NULL	NULL	NULL	NULL	NULL	NULL	NULL	NULL	NULL	NULL	NULL	NULL	NULL	NULL	NULL	NULL	NULL	NULL	NULL	NULL
Nursing	Female	70	21.97	Lower GI	2021-04-07 12:50:45	2021-04-07 13:02:00	12	2021-04-07 12:54:35	8	2021-04-07 13:36:00	2021-04-07 13:42:51	6	2021-04-07 13:48:00	2021-04-07 14:14:00	52	26	0	0	0	0	0	0	1	0	0	1	0	2	NULL	NULL	NULL	NULL	NULL	NULL	NULL	NULL	NULL	NULL	NULL	NULL	NULL	NULL	NULL	NULL	NULL	NULL	NULL	NULL	NULL
Nursing	Male	51	33.97	Lower GI	2020-07-08 13:13:59	2020-07-08 13:47:00	34	2020-07-08 13:36:48	11	2020-07-08 14:06:00	2020-07-08 14:07:01	1	2020-07-08 14:18:00	2020-07-08 14:57:00	54	39	NULL	NULL	NULL	NULL	NULL	NULL	NULL	NULL	NULL	NULL	NULL	0	NULL	NULL	NULL	NULL	NULL	NULL	NULL	NULL	NULL	NULL	NULL	NULL	NULL	NULL	NULL	NULL	NULL	NULL	NULL	NULL	NULL
Nursing	Male	65	26.63	Upper GI	2021-06-23 08:09:17	2021-06-23 08:47:00	38	2021-06-23 08:38:06	9	2021-06-23 08:51:00	2021-06-23 08:52:02	1	2021-06-23 08:59:00	2021-06-23 09:50:00	43	51	0	0	1	0	1	1	1	1	0	1	0	6	NULL	NULL	NULL	NULL	NULL	NULL	NULL	NULL	NULL	NULL	NULL	NULL	NULL	NULL	NULL	NULL	NULL	NULL	NULL	NULL	NULL
Nursing	Male	74	23.43	Lower GI	2021-05-27 10:00:50	2021-05-27 10:39:00	39	2021-05-27 10:29:00	10	2021-05-27 11:03:00	2021-05-27 11:04:14	1	2021-05-27 11:09:00	2021-05-27 11:55:00	64	46	0	0	0	1	0	1	1	0	0	1	0	4	NULL	NULL	NULL	NULL	NULL	NULL	NULL	NULL	NULL	NULL	NULL	NULL	NULL	NULL	NULL	NULL	NULL	NULL	NULL	NULL	NULL
Anesthesia	Female	59	27.46	Lower GI	2021-09-13 09:20:23	2021-09-13 09:24:00	4	2021-09-13 09:19:00	5	2021-09-13 09:39:00	2021-09-13 09:42:13	3	2021-09-13 09:45:00	2021-09-13 10:26:00	22	41	1	0	0	0	0	0	0	0	0	0	0	1	NULL	NULL	NULL	NULL	NULL	NULL	NULL	NULL	NULL	NULL	NULL	NULL	NULL	NULL	NULL	NULL	NULL	NULL	NULL	NULL	NULL
Nursing	Male	77	25.02	Lower GI	2020-11-30 12:47:58	2020-11-30 13:21:00	34	2020-11-30 13:11:00	10	2020-11-30 14:11:00	2020-11-30 14:16:00	5	2020-11-30 14:23:00	2020-11-30 15:10:00	89	47	0	0	1	0	0	1	1	0	0	1	0	4	NULL	NULL	NULL	NULL	NULL	NULL	NULL	NULL	NULL	NULL	NULL	NULL	NULL	NULL	NULL	NULL	NULL	NULL	NULL	NULL	NULL
Nursing	Female	76	22.83	Lower GI	2020-06-22 12:50:00	2020-06-22 13:18:00	28	2020-06-22 13:09:00	9	2020-06-22 13:41:00	2020-06-22 13:46:39	5	2020-06-22 13:44:00	2020-06-22 15:00:00	56	76	0	0	0	0	0	1	0	0	0	0	0	1	NULL	NULL	NULL	NULL	NULL	NULL	NULL	NULL	NULL	NULL	NULL	NULL	NULL	NULL	NULL	NULL	NULL	NULL	NULL	NULL	NULL
Nursing	Male	78	26.97	Upper GI	2020-03-10 11:49:01	2020-03-10 12:05:00	16	2020-03-10 11:59:44	6	2020-03-10 12:10:00	2020-03-10 12:14:43	4	2020-03-10 12:19:00	2020-03-10 12:48:00	25	29	0	0	0	0	1	0	0	1	0	0	0	2	NULL	NULL	NULL	NULL	NULL	NULL	NULL	NULL	NULL	NULL	NULL	NULL	NULL	NULL	NULL	NULL	NULL	NULL	NULL	NULL	NULL
Nursing	Male	79	28.06	Upper GI	2021-04-27 12:42:07	2021-04-27 13:03:00	21	2021-04-27 12:55:56	8	2021-04-27 13:05:00	2021-04-27 13:06:59	1	2021-04-27 13:12:00	2021-04-27 13:36:00	24	24	0	0	0	0	1	0	0	1	0	0	0	2	NULL	NULL	NULL	NULL	NULL	NULL	NULL	NULL	NULL	NULL	NULL	NULL	NULL	NULL	NULL	NULL	NULL	NULL	NULL	NULL	NULL
Nursing	Male	77	34.86	Lower GI	2020-07-06 11:48:39	2020-07-06 11:58:00	10	2020-07-06 11:53:06	5	2020-07-06 12:24:00	2020-07-06 12:26:50	2	2020-07-06 12:30:00	2020-07-06 13:23:00	38	53	1	0	0	0	0	1	1	0	0	1	0	4	NULL	NULL	NULL	NULL	NULL	NULL	NULL	NULL	NULL	NULL	NULL	NULL	NULL	NULL	NULL	NULL	NULL	NULL	NULL	NULL	NULL
Nursing	Male	49	26.54	Upper GI	2020-03-04 15:44:16	2020-03-04 16:23:00	39	2020-03-04 16:13:29	10	2020-03-04 16:27:00	2020-03-04 16:31:24	4	2020-03-04 16:41:00	2020-03-04 16:58:00	47	17	0	0	0	0	0	0	1	0	0	1	0	2	NULL	NULL	NULL	NULL	NULL	NULL	NULL	NULL	NULL	NULL	NULL	NULL	NULL	NULL	NULL	NULL	NULL	NULL	NULL	NULL	NULL
Nursing	Female	71	26.16	Lower GI	2020-07-24 12:03:56	2020-07-24 12:30:00	27	2020-07-24 12:13:55	17	2020-07-24 12:51:00	2020-07-24 12:54:15	3	2020-07-24 13:00:00	2020-07-24 13:43:00	51	43	NULL	NULL	NULL	NULL	NULL	NULL	NULL	NULL	NULL	NULL	NULL	0	NULL	NULL	NULL	NULL	NULL	NULL	NULL	NULL	NULL	NULL	NULL	NULL	NULL	NULL	NULL	NULL	NULL	NULL	NULL	NULL	NULL
Nursing	Male	52	27.26	Lower GI	2021-01-20 09:59:20	2021-01-20 10:16:00	17	2021-01-20 10:09:00	7	2021-01-20 10:35:00	2021-01-20 10:37:07	2	2021-01-20 10:45:00	2021-01-20 11:27:00	38	42	0	0	0	0	0	1	0	0	0	0	0	1	NULL	NULL	NULL	NULL	NULL	NULL	NULL	NULL	NULL	NULL	NULL	NULL	NULL	NULL	NULL	NULL	NULL	NULL	NULL	NULL	NULL
Nursing	Female	60	29.69	Upper GI	2020-01-21 08:30:13	2020-01-21 09:21:00	51	2020-01-21 09:14:58	7	2020-01-21 09:28:00	2020-01-21 09:30:05	2	2020-01-21 09:35:00	2020-01-21 11:15:00	60	100	NULL	NULL	NULL	NULL	NULL	NULL	NULL	NULL	NULL	NULL	NULL	0	NULL	NULL	NULL	NULL	NULL	NULL	NULL	NULL	NULL	NULL	NULL	NULL	NULL	NULL	NULL	NULL	NULL	NULL	NULL	NULL	NULL
Nursing	Female	60	30.3	Upper GI	2020-10-27 08:53:41	2020-10-27 09:27:00	34	2020-10-27 09:19:51	8	2020-10-27 09:30:00	2020-10-27 09:34:32	4	2020-10-27 09:41:00	2020-10-27 10:23:00	41	42	NULL	NULL	NULL	NULL	NULL	NULL	NULL	NULL	NULL	NULL	NULL	0	NULL	NULL	NULL	NULL	NULL	NULL	NULL	NULL	NULL	NULL	NULL	NULL	NULL	NULL	NULL	NULL	NULL	NULL	NULL	NULL	NULL
Nursing	Male	56	28.94	Upper GI	2020-05-28 14:22:18	2020-05-28 14:52:00	30	2020-05-28 14:44:48	8	2020-05-28 14:58:00	2020-05-28 15:00:39	2	2020-05-28 15:11:00	2020-05-28 16:14:00	38	63	0	0	0	0	0	1	0	0	0	0	0	1	NULL	NULL	NULL	NULL	NULL	NULL	NULL	NULL	NULL	NULL	NULL	NULL	NULL	NULL	NULL	NULL	NULL	NULL	NULL	NULL	NULL
Nursing	Female	72	30.18	DUAL	2020-09-02 09:23:15	2020-09-02 10:25:00	62	2020-09-02 10:15:24	10	2020-09-02 11:15:00	2020-09-02 11:21:25	6	2020-09-02 11:28:00	2020-09-02 13:01:00	118	93	0	0	0	0	0	1	0	0	0	0	0	1	NULL	NULL	NULL	NULL	NULL	NULL	NULL	NULL	NULL	NULL	NULL	NULL	NULL	NULL	NULL	NULL	NULL	NULL	NULL	NULL	NULL
Anesthesia	Female	73	31.47	Lower GI	2021-09-01 10:51:00	2021-09-01 10:56:00	5	2021-09-01 10:51:00	5	2021-09-01 11:11:00	2021-09-01 11:13:00	2	2021-09-01 11:15:00	2021-09-01 11:25:00	22	10	0	0	0	0	0	1	0	0	0	0	0	1	NULL	NULL	NULL	NULL	NULL	NULL	NULL	NULL	NULL	NULL	NULL	NULL	NULL	NULL	NULL	NULL	NULL	NULL	NULL	NULL	NULL
Nursing	Female	56	28.25	Upper GI	2021-05-05 16:57:20	2021-05-05 17:20:00	23	2021-05-05 17:14:00	6	2021-05-05 17:27:00	2021-05-05 17:33:51	6	2021-05-05 17:41:00	2021-05-05 18:22:00	36	41	NULL	NULL	NULL	NULL	NULL	NULL	NULL	NULL	NULL	NULL	NULL	0	NULL	NULL	NULL	NULL	NULL	NULL	NULL	NULL	NULL	NULL	NULL	NULL	NULL	NULL	NULL	NULL	NULL	NULL	NULL	NULL	NULL
Anesthesia	Male	64	29.16	Lower GI	2021-08-30 12:20:15	2021-08-30 12:27:00	7	2021-08-30 12:18:00	9	2021-08-30 12:41:00	2021-08-30 12:44:40	3	2021-08-30 12:45:00	2021-08-30 13:07:00	24	22	1	0	0	0	0	0	0	0	0	0	0	1	NULL	NULL	NULL	NULL	NULL	NULL	NULL	NULL	NULL	NULL	NULL	NULL	NULL	NULL	NULL	NULL	NULL	NULL	NULL	NULL	NULL
Nursing	Male	73	30.17	Upper GI	2021-02-11 08:25:08	2021-02-11 08:46:00	21	2021-02-11 08:37:00	9	2021-02-11 08:54:00	2021-02-11 08:57:24	3	2021-02-11 09:00:00	2021-02-11 09:50:00	32	50	0	0	0	1	0	1	0	0	0	0	0	2	NULL	NULL	NULL	NULL	NULL	NULL	NULL	NULL	NULL	NULL	NULL	NULL	NULL	NULL	NULL	NULL	NULL	NULL	NULL	NULL	NULL
Nursing	Male	58	30.87	Lower GI	2021-01-19 16:49:00	2021-01-19 17:05:00	16	2021-01-19 16:53:00	12	2021-01-19 17:29:00	2021-01-19 17:34:18	5	2021-01-19 17:33:00	2021-01-19 18:23:00	45	50	0	0	0	1	0	1	0	0	0	0	0	2	NULL	NULL	NULL	NULL	NULL	NULL	NULL	NULL	NULL	NULL	NULL	NULL	NULL	NULL	NULL	NULL	NULL	NULL	NULL	NULL	NULL
Nursing	Female	61	19.21	Lower GI	2021-01-28 08:09:28	2021-01-28 08:32:00	23	2021-01-28 08:22:00	10	2021-01-28 08:59:00	2021-01-28 09:03:12	4	2021-01-28 09:06:00	2021-01-28 10:04:00	54	58	0	0	0	0	0	0	1	0	0	1	0	2	NULL	NULL	NULL	NULL	NULL	NULL	NULL	NULL	NULL	NULL	NULL	NULL	NULL	NULL	NULL	NULL	NULL	NULL	NULL	NULL	NULL
Anesthesia	Female	73	21.8	Lower GI	2021-10-25 15:49:15	2021-10-25 16:07:00	18	2021-10-25 16:00:00	7	2021-10-25 16:24:00	2021-10-25 16:26:00	2	2021-10-25 16:32:00	2021-10-25 16:50:00	37	18	0	0	0	1	0	0	0	0	0	0	0	1	NULL	NULL	NULL	NULL	NULL	NULL	NULL	NULL	NULL	NULL	NULL	NULL	NULL	NULL	NULL	NULL	NULL	NULL	NULL	NULL	NULL
Nursing	Female	70	21.73	Lower GI	2020-07-20 13:41:07	2020-07-20 13:56:00	15	2020-07-20 13:47:00	9	2020-07-20 14:26:00	2020-07-20 14:28:42	2	2020-07-20 14:30:00	2020-07-20 15:07:00	47	37	0	0	0	1	0	0	0	0	0	0	0	1	NULL	NULL	NULL	NULL	NULL	NULL	NULL	NULL	NULL	NULL	NULL	NULL	NULL	NULL	NULL	NULL	NULL	NULL	NULL	NULL	NULL
Nursing	Male	69	26.3	Lower GI	2020-08-13 15:24:06	2020-08-13 15:56:00	32	2020-08-13 15:45:06	11	2020-08-13 16:04:00	2020-08-13 16:10:15	6	2020-08-13 16:14:00	2020-08-13 17:15:00	46	61	0	0	0	0	0	0	1	0	0	1	0	2	NULL	NULL	NULL	NULL	NULL	NULL	NULL	NULL	NULL	NULL	NULL	NULL	NULL	NULL	NULL	NULL	NULL	NULL	NULL	NULL	NULL
Nursing	Male	69	26.46	Lower GI	2020-02-20 13:05:28	2020-02-20 13:22:00	17	2020-02-20 13:11:57	11	2020-02-20 13:33:00	2020-02-20 13:35:15	2	2020-02-20 13:40:00	2020-02-20 13:55:00	30	15	0	0	0	0	0	0	1	0	0	1	0	2	NULL	NULL	NULL	NULL	NULL	NULL	NULL	NULL	NULL	NULL	NULL	NULL	NULL	NULL	NULL	NULL	NULL	NULL	NULL	NULL	NULL
Nursing	Male	63	26.58	Lower GI	2021-03-04 11:35:10	2021-03-04 11:54:00	19	2021-03-04 11:45:37	9	2021-03-04 12:16:00	2021-03-04 12:21:52	5	2021-03-04 12:26:00	2021-03-04 13:07:00	46	41	NULL	NULL	NULL	NULL	NULL	NULL	NULL	NULL	NULL	NULL	NULL	0	NULL	NULL	NULL	NULL	NULL	NULL	NULL	NULL	NULL	NULL	NULL	NULL	NULL	NULL	NULL	NULL	NULL	NULL	NULL	NULL	NULL
Nursing	Male	72	19.91	Upper GI	2021-02-16 10:04:45	2021-02-16 10:29:00	25	2021-02-16 10:21:00	8	2021-02-16 10:33:00	2021-02-16 10:39:00	6	2021-02-16 10:41:00	2021-02-16 11:35:00	35	54	0	0	0	0	1	1	1	1	0	1	0	5	NULL	NULL	NULL	NULL	NULL	NULL	NULL	NULL	NULL	NULL	NULL	NULL	NULL	NULL	NULL	NULL	NULL	NULL	NULL	NULL	NULL
Nursing	Male	71	34.96	Upper GI	2021-05-03 16:11:55	2021-05-03 16:29:00	18	2021-05-03 16:20:00	9	2021-05-03 16:43:00	2021-05-03 16:47:05	4	2021-05-03 16:51:00	2021-05-03 17:37:00	36	46	0	1	0	1	0	0	0	0	0	0	1	3	NULL	NULL	NULL	NULL	NULL	NULL	NULL	NULL	NULL	NULL	NULL	NULL	NULL	NULL	NULL	NULL	NULL	NULL	NULL	NULL	NULL
Nursing	Female	44	18.93	Lower GI	2020-06-10 08:29:00	2020-06-10 08:45:00	16	2020-06-10 08:36:00	9	2020-06-10 09:21:00	2020-06-10 09:24:36	3	2020-06-10 09:28:00	2020-06-10 10:00:00	55	32	NULL	NULL	NULL	NULL	NULL	NULL	NULL	NULL	NULL	NULL	NULL	0	NULL	NULL	NULL	NULL	NULL	NULL	NULL	NULL	NULL	NULL	NULL	NULL	NULL	NULL	NULL	NULL	NULL	NULL	NULL	NULL	NULL
Nursing	Female	79	27.21	Lower GI	2021-04-09 12:56:00	2021-04-09 13:37:00	41	2021-04-09 13:30:00	7	2021-04-09 14:00:00	2021-04-09 14:04:37	4	2021-04-09 14:08:00	2021-04-09 14:43:00	68	35	0	0	0	0	0	1	1	0	0	1	1	4	NULL	NULL	NULL	NULL	NULL	NULL	NULL	NULL	NULL	NULL	NULL	NULL	NULL	NULL	NULL	NULL	NULL	NULL	NULL	NULL	NULL
Nursing	Female	46	28.9	Upper GI	2021-01-25 10:30:00	2021-01-25 10:53:00	23	2021-01-25 10:38:00	15	2021-01-25 10:56:00	2021-01-25 11:00:00	4	2021-01-25 11:15:00	2021-01-25 12:00:00	30	45	0	0	0	0	0	0	0	0	0	0	0	0	4	mg	NULL	NULL	NULL	NULL	NULL	NULL	NULL	NULL	NULL	NULL	NULL	NULL	NULL	NULL	NULL	NULL	NULL	NULL	NULL
Nursing	Female	73	22.65	Upper GI	2020-10-15 10:31:49	2020-10-15 10:48:00	17	2020-10-15 10:36:38	12	2020-10-15 10:59:00	2020-10-15 11:04:16	5	2020-10-15 11:08:00	2020-10-15 11:56:00	33	48	0	0	0	1	0	1	0	0	0	0	0	2	NULL	NULL	NULL	NULL	NULL	NULL	NULL	NULL	NULL	NULL	NULL	NULL	NULL	NULL	NULL	NULL	NULL	NULL	NULL	NULL	NULL
Nursing	Female	70	20.5	Lower GI	2021-02-17 07:30:35	2021-02-17 08:22:00	52	2021-02-17 08:14:48	8	2021-02-17 08:40:00	2021-02-17 08:44:18	4	2021-02-17 08:49:00	2021-02-17 09:39:00	74	50	0	0	0	0	0	1	0	0	0	0	0	1	NULL	NULL	NULL	NULL	NULL	NULL	NULL	NULL	NULL	NULL	NULL	NULL	NULL	NULL	NULL	NULL	NULL	NULL	NULL	NULL	NULL
Anesthesia	Female	65	24.89	Lower GI	2021-10-15 10:26:00	2021-10-15 10:32:00	6	2021-10-15 10:26:00	6	2021-10-15 10:57:00	2021-10-15 11:00:45	3	2021-10-15 11:06:00	2021-10-15 12:10:00	34	64	0	0	0	0	0	1	0	0	0	0	0	1	NULL	NULL	NULL	NULL	NULL	NULL	NULL	NULL	NULL	NULL	NULL	NULL	NULL	NULL	NULL	NULL	NULL	NULL	NULL	NULL	NULL
Nursing	Male	51	30.23	Lower GI	2020-10-15 13:11:03	2020-10-15 13:21:00	10	2020-10-15 13:14:40	7	2020-10-15 13:47:00	2020-10-15 13:50:00	3	2020-10-15 13:55:00	2020-10-15 14:32:00	39	37	0	0	0	0	0	1	1	0	0	1	0	3	NULL	NULL	NULL	NULL	NULL	NULL	NULL	NULL	NULL	NULL	NULL	NULL	NULL	NULL	NULL	NULL	NULL	NULL	NULL	NULL	NULL
Nursing	Female	58	24.19	Lower GI	2020-09-16 15:29:25	2020-09-16 15:48:00	19	2020-09-16 15:37:18	11	2020-09-16 16:17:00	2020-09-16 16:19:32	2	2020-09-16 16:25:00	2020-09-16 16:51:00	50	26	0	0	0	0	1	1	0	1	0	0	0	3	NULL	NULL	NULL	NULL	NULL	NULL	NULL	NULL	NULL	NULL	NULL	NULL	NULL	NULL	NULL	NULL	NULL	NULL	NULL	NULL	NULL
Nursing	Male	65	21.62	Lower GI	2021-06-03 09:44:34	2021-06-03 10:00:00	16	2021-06-03 09:48:00	12	2021-06-03 10:35:00	2021-06-03 10:40:02	5	2021-06-03 10:44:00	2021-06-03 11:14:00	56	30	0	0	0	0	0	0	1	1	0	1	0	3	NULL	NULL	NULL	NULL	NULL	NULL	NULL	NULL	NULL	NULL	NULL	NULL	NULL	NULL	NULL	NULL	NULL	NULL	NULL	NULL	NULL
Nursing	Male	60	35.35	Upper GI	2020-11-02 13:58:05	2020-11-02 14:23:00	25	2020-11-02 14:14:00	9	2020-11-02 14:29:00	2020-11-02 14:32:42	3	2020-11-02 14:39:00	2020-11-02 15:40:00	34	61	1	1	1	1	0	1	0	0	0	0	0	5	NULL	NULL	NULL	NULL	NULL	NULL	NULL	NULL	NULL	NULL	NULL	NULL	NULL	NULL	NULL	NULL	NULL	NULL	NULL	NULL	NULL
Nursing	Female	71	32.72	Lower GI	2020-09-02 13:25:46	2020-09-02 13:43:00	18	2020-09-02 13:36:36	7	2020-09-02 13:59:00	2020-09-02 14:05:21	6	2020-09-02 14:09:00	2020-09-02 14:49:00	40	40	0	0	0	0	0	1	1	0	0	1	0	3	NULL	NULL	NULL	NULL	NULL	NULL	NULL	NULL	NULL	NULL	NULL	NULL	NULL	NULL	NULL	NULL	NULL	NULL	NULL	NULL	NULL
Anesthesia	Female	80	42.93	DUAL	2021-08-30 12:58:48	2021-08-30 13:05:00	7	2021-08-30 12:58:00	7	2021-08-30 13:48:00	2021-08-30 14:10:45	22	2021-08-30 14:16:00	2021-08-30 15:10:00	72	54	1	0	1	1	0	1	1	0	0	1	0	6	NULL	NULL	NULL	NULL	NULL	NULL	NULL	NULL	NULL	NULL	NULL	NULL	NULL	NULL	NULL	NULL	NULL	NULL	NULL	NULL	NULL
Nursing	Male	56	29.43	DUAL	2020-05-18 08:28:34	2020-05-18 08:47:00	19	2020-05-18 08:36:53	11	2020-05-18 09:12:00	2020-05-18 09:17:21	5	2020-05-18 09:21:00	2020-05-18 09:41:00	49	20	0	1	0	1	0	0	0	0	0	0	0	2	NULL	NULL	NULL	NULL	NULL	NULL	NULL	NULL	NULL	NULL	NULL	NULL	NULL	NULL	NULL	NULL	NULL	NULL	NULL	NULL	NULL
Nursing	Male	55	24.8	Upper GI	2021-05-18 06:39:47	2021-05-18 07:50:00	71	2021-05-18 07:43:16	7	2021-05-18 07:53:00	2021-05-18 07:55:47	2	2021-05-18 08:04:00	2021-05-18 08:25:00	76	21	0	0	0	0	0	1	1	1	0	1	0	4	NULL	NULL	NULL	NULL	NULL	NULL	NULL	NULL	NULL	NULL	NULL	NULL	NULL	NULL	NULL	NULL	NULL	NULL	NULL	NULL	NULL
Nursing	Male	62	25.24	Lower GI	2020-09-29 07:05:30	2020-09-29 07:39:00	34	2020-09-29 07:32:49	7	2020-09-29 08:08:00	2020-09-29 08:10:38	2	2020-09-29 08:15:00	2020-09-29 08:40:00	65	25	1	0	0	0	0	0	0	0	0	0	0	1	NULL	NULL	NULL	NULL	NULL	NULL	NULL	NULL	NULL	NULL	NULL	NULL	NULL	NULL	NULL	NULL	NULL	NULL	NULL	NULL	NULL
Nursing	Male	68	28.17	Lower GI	2020-07-27 14:17:02	2020-07-27 14:36:00	19	2020-07-27 14:28:59	8	2020-07-27 15:18:00	2020-07-27 15:20:56	2	2020-07-27 15:20:00	2020-07-27 15:32:00	63	12	1	0	0	0	0	1	1	0	1	1	1	6	NULL	NULL	NULL	NULL	NULL	NULL	NULL	NULL	NULL	NULL	NULL	NULL	NULL	NULL	NULL	NULL	NULL	NULL	NULL	NULL	NULL
Anesthesia	Female	68	39.38	Lower GI	2021-08-27 09:06:27	2021-08-27 09:16:00	10	2021-08-27 09:10:00	6	2021-08-27 09:32:00	2021-08-27 09:36:44	4	2021-08-27 09:40:00	2021-08-27 10:25:00	30	45	0	0	0	0	0	1	0	0	0	0	0	1	NULL	NULL	NULL	NULL	NULL	NULL	NULL	NULL	NULL	NULL	NULL	NULL	NULL	NULL	NULL	NULL	NULL	NULL	NULL	NULL	NULL
Anesthesia	Female	44	29.63	Lower GI	2021-08-27 07:38:00	2021-08-27 07:43:00	5	2021-08-27 07:38:00	5	2021-08-27 08:00:00	2021-08-27 08:02:00	2	2021-08-27 08:05:00	2021-08-27 08:30:00	24	25	0	0	0	1	0	0	0	0	0	0	0	1	NULL	NULL	NULL	NULL	NULL	NULL	NULL	NULL	NULL	NULL	NULL	NULL	NULL	NULL	NULL	NULL	NULL	NULL	NULL	NULL	NULL
Nursing	Male	61	28.51	Lower GI	2020-06-24 14:44:39	2020-06-24 14:59:00	15	2020-06-24 14:54:36	5	2020-06-24 15:40:00	2020-06-24 15:42:48	2	2020-06-24 15:50:00	2020-06-24 16:06:00	58	16	0	0	0	0	0	1	0	0	0	0	0	1	NULL	NULL	NULL	NULL	NULL	NULL	NULL	NULL	NULL	NULL	NULL	NULL	NULL	NULL	NULL	NULL	NULL	NULL	NULL	NULL	NULL
Nursing	Female	62	26.95	Lower GI	2020-01-28 15:14:34	2020-01-28 16:22:00	68	2020-01-28 16:14:37	8	2020-01-28 16:42:00	2020-01-28 16:43:34	1	2020-01-28 16:56:00	2020-01-28 17:50:00	89	54	1	1	0	1	0	1	1	1	0	1	0	7	NULL	NULL	NULL	NULL	NULL	NULL	NULL	NULL	NULL	NULL	NULL	NULL	NULL	NULL	NULL	NULL	NULL	NULL	NULL	NULL	NULL
Nursing	Male	44	31.47	Lower GI	2021-03-09 13:23:32	2021-03-09 13:48:00	25	2021-03-09 13:40:00	8	2021-03-09 14:04:00	2021-03-09 14:05:51	1	2021-03-09 14:10:00	2021-03-09 15:06:00	42	56	1	0	0	1	0	1	0	0	0	0	0	3	NULL	NULL	NULL	NULL	NULL	NULL	NULL	NULL	NULL	NULL	NULL	NULL	NULL	NULL	NULL	NULL	NULL	NULL	NULL	NULL	NULL
Nursing	Female	66	41.66	Upper GI	2021-01-12 11:38:09	2021-01-12 12:09:00	31	2021-01-12 12:00:30	9	2021-01-12 12:15:00	2021-01-12 12:22:21	7	2021-01-12 12:30:00	2021-01-12 13:26:00	44	56	1	0	0	1	0	1	0	0	0	0	0	3	NULL	NULL	NULL	NULL	NULL	NULL	NULL	NULL	NULL	NULL	NULL	NULL	NULL	NULL	NULL	NULL	NULL	NULL	NULL	NULL	NULL
Nursing	Female	58	30.5	Upper GI	2020-03-10 07:01:27	2020-03-10 07:23:00	22	2020-03-10 07:15:41	8	2020-03-10 07:27:00	2020-03-10 07:31:08	4	2020-03-10 07:39:00	2020-03-10 07:55:00	30	16	1	1	0	1	0	1	1	0	0	1	0	6	NULL	NULL	NULL	NULL	NULL	NULL	NULL	NULL	NULL	NULL	NULL	NULL	NULL	NULL	NULL	NULL	NULL	NULL	NULL	NULL	NULL
Nursing	Male	80	24.12	Lower GI	2021-04-06 13:50:01	2021-04-06 14:06:00	16	2021-04-06 13:55:50	11	2021-04-06 14:39:00	2021-04-06 14:44:56	5	2021-04-06 14:45:00	2021-04-06 15:15:00	54	30	0	0	0	0	0	1	0	0	0	0	1	2	NULL	NULL	NULL	NULL	NULL	NULL	NULL	NULL	NULL	NULL	NULL	NULL	NULL	NULL	NULL	NULL	NULL	NULL	NULL	NULL	NULL
Nursing	Male	66	25.07	DUAL	2021-01-12 07:19:58	2021-01-12 07:33:00	14	2021-01-12 07:26:17	7	2021-01-12 08:20:00	2021-01-12 08:23:00	3	2021-01-12 08:28:00	2021-01-12 10:00:00	64	92	NULL	NULL	NULL	NULL	NULL	NULL	NULL	NULL	NULL	NULL	NULL	0	NULL	NULL	NULL	NULL	NULL	NULL	NULL	NULL	NULL	NULL	NULL	NULL	NULL	NULL	NULL	NULL	NULL	NULL	NULL	NULL	NULL
Nursing	Male	51	30.71	Lower GI	2020-01-14 14:41:08	2020-01-14 15:07:00	26	2020-01-14 14:57:22	10	2020-01-14 15:20:00	2020-01-14 15:21:24	1	2020-01-14 15:33:00	2020-01-14 15:52:00	40	19	0	0	0	0	0	0	0	1	0	0	0	1	NULL	NULL	NULL	NULL	NULL	NULL	NULL	NULL	NULL	NULL	NULL	NULL	NULL	NULL	NULL	NULL	NULL	NULL	NULL	NULL	NULL
Nursing	Female	59	22.06	Upper GI	2020-02-15 15:42:12	2020-02-15 16:01:00	19	2020-02-15 15:55:06	6	2020-02-15 16:11:00	2020-02-15 16:17:40	6	2020-02-15 16:17:00	2020-02-15 16:37:00	35	20	0	0	0	0	0	0	0	1	0	0	0	1	NULL	NULL	NULL	NULL	NULL	NULL	NULL	NULL	NULL	NULL	NULL	NULL	NULL	NULL	NULL	NULL	NULL	NULL	NULL	NULL	NULL
Nursing	Female	42	25.63	Upper GI	2020-07-24 13:09:00	2020-07-24 13:34:00	25	2020-07-24 13:19:00	15	2020-07-24 13:43:00	2020-07-24 13:48:52	5	2020-07-24 13:54:00	2020-07-24 14:11:00	39	17	0	0	0	1	0	1	0	0	0	0	0	2	NULL	NULL	NULL	NULL	NULL	NULL	NULL	NULL	NULL	NULL	NULL	NULL	NULL	NULL	NULL	NULL	NULL	NULL	NULL	NULL	NULL
Anesthesia	Female	71	32.28	Upper GI	2021-10-12 13:12:07	2021-10-12 13:17:00	5	2021-10-12 13:11:00	6	2021-10-12 13:26:00	2021-10-12 13:29:47	3	2021-10-12 13:30:00	2021-10-12 14:50:00	17	80	1	0	0	1	0	0	0	0	0	0	0	2	NULL	NULL	NULL	NULL	NULL	NULL	NULL	NULL	NULL	NULL	NULL	NULL	NULL	NULL	NULL	NULL	NULL	NULL	NULL	NULL	NULL
Nursing	Female	76	24.69	Upper GI	2021-03-02 07:33:18	2021-03-02 08:00:00	27	2021-03-02 07:54:08	6	2021-03-02 08:05:00	2021-03-02 08:10:08	5	2021-03-02 08:15:00	2021-03-02 09:15:00	37	60	0	0	0	1	0	0	0	0	0	0	0	1	NULL	NULL	NULL	NULL	NULL	NULL	NULL	NULL	NULL	NULL	NULL	NULL	NULL	NULL	NULL	NULL	NULL	NULL	NULL	NULL	NULL
Nursing	Male	67	28.48	Upper GI	2021-04-26 08:22:39	2021-04-26 08:34:00	12	2021-04-26 08:25:00	9	2021-04-26 08:42:00	2021-04-26 08:55:49	13	2021-04-26 09:04:00	2021-04-26 09:32:00	33	28	0	0	0	0	0	1	0	1	0	0	0	2	NULL	NULL	NULL	NULL	NULL	NULL	NULL	NULL	NULL	NULL	NULL	NULL	NULL	NULL	NULL	NULL	NULL	NULL	NULL	NULL	NULL
Nursing	Male	66	29.16	Upper GI	2020-07-28 10:30:23	2020-07-28 12:28:00	118	2020-07-28 12:25:00	3	2020-07-28 12:36:00	2020-07-28 12:40:52	4	2020-07-28 12:43:00	2020-07-28 12:59:00	130	16	0	0	0	0	0	1	0	1	0	0	0	2	NULL	NULL	NULL	NULL	NULL	NULL	NULL	NULL	NULL	NULL	NULL	NULL	NULL	NULL	NULL	NULL	NULL	NULL	NULL	NULL	NULL
Nursing	Male	69	20.54	Lower GI	2021-01-27 13:32:29	2021-01-27 13:45:00	13	2021-01-27 13:38:05	7	2021-01-27 14:17:00	2021-01-27 14:20:03	3	2021-01-27 14:24:00	2021-01-27 16:00:00	48	96	0	0	0	0	0	0	0	1	0	0	0	1	NULL	NULL	NULL	NULL	NULL	NULL	NULL	NULL	NULL	NULL	NULL	NULL	NULL	NULL	NULL	NULL	NULL	NULL	NULL	NULL	NULL
Nursing	Male	43	30.43	Lower GI	2021-06-24 15:04:38	2021-06-24 15:31:00	27	2021-06-24 15:24:00	7	2021-06-24 15:54:00	2021-06-24 15:56:15	2	2021-06-24 16:00:00	2021-06-24 16:45:00	52	45	0	0	0	0	0	0	0	0	0	0	0	0	NULL	NULL	NULL	NULL	NULL	NULL	NULL	NULL	NULL	NULL	NULL	NULL	NULL	NULL	NULL	NULL	NULL	NULL	NULL	NULL	NULL
Nursing	Female	72	25.1	Lower GI	2020-11-13 10:45:00	2020-11-13 11:01:00	16	2020-11-13 10:55:40	6	2020-11-13 11:15:00	2020-11-13 11:20:00	5	2020-11-13 11:31:00	2020-11-13 13:15:00	35	104	NULL	NULL	NULL	NULL	NULL	NULL	NULL	NULL	NULL	NULL	NULL	0	4	mg	NULL	NULL	NULL	NULL	NULL	NULL	NULL	NULL	NULL	NULL	NULL	NULL	NULL	NULL	NULL	NULL	NULL	NULL	NULL
Nursing	Female	65	29.71	Lower GI	2021-02-11 13:56:13	2021-02-11 14:47:00	51	2021-02-11 14:38:30	9	2021-02-11 15:01:00	2021-02-11 15:03:52	2	2021-02-11 15:08:00	2021-02-11 15:41:00	67	33	1	0	0	1	0	1	0	0	0	0	0	3	NULL	NULL	NULL	NULL	NULL	NULL	NULL	NULL	NULL	NULL	NULL	NULL	NULL	NULL	NULL	NULL	NULL	NULL	NULL	NULL	NULL
Nursing	Female	64	22.96	Lower GI	2020-01-30 08:09:20	2020-01-30 08:35:00	26	2020-01-30 08:25:00	10	2020-01-30 08:58:00	2020-01-30 09:00:00	2	2020-01-30 09:07:00	2020-01-30 09:35:00	51	28	0	0	0	0	0	1	1	1	0	1	1	5	NULL	NULL	NULL	NULL	NULL	NULL	NULL	NULL	NULL	NULL	NULL	NULL	NULL	NULL	NULL	NULL	NULL	NULL	NULL	NULL	NULL
Anesthesia	Female	43	25.84	Lower GI	2021-09-29 11:24:02	2021-09-29 11:29:00	5	2021-09-29 11:22:00	7	2021-09-29 11:43:00	2021-09-29 11:47:42	4	2021-09-29 11:45:00	2021-09-29 12:00:00	23	15	0	0	0	0	0	0	0	1	0	0	0	1	NULL	NULL	NULL	NULL	NULL	NULL	NULL	NULL	NULL	NULL	NULL	NULL	NULL	NULL	NULL	NULL	NULL	NULL	NULL	NULL	NULL
Nursing	Female	58	37.61	Lower GI	2020-02-04 09:30:58	2020-02-04 09:52:00	22	2020-02-04 09:43:00	9	2020-02-04 10:03:00	2020-02-04 10:05:00	2	2020-02-04 10:10:00	2020-02-04 10:38:00	35	28	1	0	0	0	0	1	0	1	0	0	0	3	NULL	NULL	NULL	NULL	NULL	NULL	NULL	NULL	NULL	NULL	NULL	NULL	NULL	NULL	NULL	NULL	NULL	NULL	NULL	NULL	NULL
Nursing	Female	60	27.25	Lower GI	2021-04-21 12:06:58	2021-04-21 12:19:00	13	2021-04-21 12:12:01	7	2021-04-21 12:29:00	2021-04-21 12:33:46	4	2021-04-21 12:39:00	2021-04-21 13:00:00	27	21	0	0	0	0	0	1	0	1	0	0	0	2	NULL	NULL	NULL	NULL	NULL	NULL	NULL	NULL	NULL	NULL	NULL	NULL	NULL	NULL	NULL	NULL	NULL	NULL	NULL	NULL	NULL
Nursing	Male	76	28.89	Lower GI	2021-04-26 12:59:41	2021-04-26 13:17:00	18	2021-04-26 13:09:08	8	2021-04-26 13:40:00	2021-04-26 13:46:21	6	2021-04-26 13:50:00	2021-04-26 14:35:00	47	45	0	0	0	1	0	0	0	0	0	0	0	1	NULL	NULL	NULL	NULL	NULL	NULL	NULL	NULL	NULL	NULL	NULL	NULL	NULL	NULL	NULL	NULL	NULL	NULL	NULL	NULL	NULL
Nursing	Female	65	27.12	Upper GI	2021-02-08 08:57:19	2021-02-08 09:25:00	28	2021-02-08 09:18:16	7	2021-02-08 09:29:00	2021-02-08 09:35:08	6	2021-02-08 09:40:00	2021-02-08 10:08:00	38	28	0	0	0	1	0	0	0	0	0	0	0	1	NULL	NULL	NULL	NULL	NULL	NULL	NULL	NULL	NULL	NULL	NULL	NULL	NULL	NULL	NULL	NULL	NULL	NULL	NULL	NULL	NULL
Anesthesia	Male	65	21.63	Upper GI	2021-10-25 15:00:45	2021-10-25 15:03:00	3	2021-10-25 14:58:00	5	2021-10-25 15:07:00	2021-10-25 15:09:40	2	2021-10-25 15:13:00	2021-10-25 15:29:00	9	16	0	1	0	0	0	1	1	0	0	1	0	4	NULL	NULL	NULL	NULL	NULL	NULL	NULL	NULL	NULL	NULL	NULL	NULL	NULL	NULL	NULL	NULL	NULL	NULL	NULL	NULL	NULL
Nursing	Female	65	32.45	Lower GI	2021-01-21 10:27:56	2021-01-21 10:41:00	14	2021-01-21 10:34:00	7	2021-01-21 11:07:00	2021-01-21 11:11:24	4	2021-01-21 11:15:00	2021-01-21 12:05:00	44	50	0	1	0	1	0	0	0	0	0	0	0	2	NULL	NULL	NULL	NULL	NULL	NULL	NULL	NULL	NULL	NULL	NULL	NULL	NULL	NULL	NULL	NULL	NULL	NULL	NULL	NULL	NULL
Nursing	Male	64	31.38	DUAL	2020-06-03 12:37:32	2020-06-03 13:21:00	44	2020-06-03 13:11:00	10	2020-06-03 13:45:00	2020-06-03 13:50:34	5	2020-06-03 13:55:00	2020-06-03 14:35:00	73	40	1	0	0	1	0	1	0	0	0	0	0	3	NULL	NULL	NULL	NULL	NULL	NULL	NULL	NULL	NULL	NULL	NULL	NULL	NULL	NULL	NULL	NULL	NULL	NULL	NULL	NULL	NULL
Nursing	Male	66	26.36	Lower GI	2021-03-03 12:44:48	2021-03-03 13:11:00	27	2021-03-03 13:04:00	7	2021-03-03 13:25:00	2021-03-03 13:26:25	1	2021-03-03 13:33:00	2021-03-03 14:45:00	42	72	1	0	0	0	0	1	0	0	0	0	0	2	NULL	NULL	NULL	NULL	NULL	NULL	NULL	NULL	NULL	NULL	NULL	NULL	NULL	NULL	NULL	NULL	NULL	NULL	NULL	NULL	NULL
Nursing	Female	61	39.06	Lower GI	2021-05-06 06:59:11	2021-05-06 07:14:00	15	2021-05-06 07:03:11	11	2021-05-06 07:30:00	2021-05-06 07:36:16	6	2021-05-06 07:39:00	2021-05-06 08:12:00	37	33	0	0	0	0	0	0	0	1	0	0	0	1	NULL	NULL	NULL	NULL	NULL	NULL	NULL	NULL	NULL	NULL	NULL	NULL	NULL	NULL	NULL	NULL	NULL	NULL	NULL	NULL	NULL
Anesthesia	Female	42	20.12	Lower GI	2021-10-22 11:17:59	2021-10-22 11:37:00	20	2021-10-22 11:31:00	6	2021-10-22 11:52:00	2021-10-22 11:54:48	2	2021-10-22 12:00:00	2021-10-22 12:23:00	37	23	NULL	NULL	NULL	NULL	NULL	NULL	NULL	NULL	NULL	NULL	NULL	0	NULL	NULL	NULL	NULL	NULL	NULL	NULL	NULL	NULL	NULL	NULL	NULL	NULL	NULL	NULL	NULL	NULL	NULL	NULL	NULL	NULL
Nursing	Female	67	19.01	Lower GI	2021-01-11 14:42:17	2021-01-11 15:06:00	24	2021-01-11 14:55:10	11	2021-01-11 15:22:00	2021-01-11 15:26:00	4	2021-01-11 15:29:00	2021-01-11 16:00:00	44	31	NULL	NULL	NULL	NULL	NULL	NULL	NULL	NULL	NULL	NULL	NULL	0	NULL	NULL	NULL	NULL	NULL	NULL	NULL	NULL	NULL	NULL	NULL	NULL	NULL	NULL	NULL	NULL	NULL	NULL	NULL	NULL	NULL
Nursing	Female	53	28.34	Lower GI	2021-02-22 13:32:46	2021-02-22 13:51:00	19	2021-02-22 13:41:45	10	2021-02-22 14:29:00	2021-02-22 14:33:33	4	2021-02-22 14:38:00	2021-02-22 14:50:00	61	12	0	0	0	1	0	1	0	0	0	0	0	2	NULL	NULL	NULL	NULL	NULL	NULL	NULL	NULL	NULL	NULL	NULL	NULL	NULL	NULL	NULL	NULL	NULL	NULL	NULL	NULL	NULL
Nursing	Male	62	28.7	Lower GI	2021-03-10 10:07:05	2021-03-10 10:30:00	23	2021-03-10 10:19:37	11	2021-03-10 10:39:00	2021-03-10 10:41:25	2	2021-03-10 10:47:00	2021-03-10 11:12:00	34	25	0	0	0	0	0	1	0	0	0	0	0	1	NULL	NULL	NULL	NULL	NULL	NULL	NULL	NULL	NULL	NULL	NULL	NULL	NULL	NULL	NULL	NULL	NULL	NULL	NULL	NULL	NULL
Nursing	Female	68	23.57	DUAL	2021-05-03 13:44:32	2021-05-03 14:03:00	19	2021-05-03 13:56:49	7	2021-05-03 14:37:00	2021-05-03 14:39:41	2	2021-05-03 14:50:00	2021-05-03 15:00:00	55	10	0	0	0	0	0	1	0	0	0	0	0	1	NULL	NULL	NULL	NULL	NULL	NULL	NULL	NULL	NULL	NULL	NULL	NULL	NULL	NULL	NULL	NULL	NULL	NULL	NULL	NULL	NULL
Nursing	Female	67	29.15	Lower GI	2020-02-05 12:15:48	2020-02-05 13:04:00	49	2020-01-29 05:52:00	10512	2020-02-05 13:15:00	2020-02-05 13:36:46	21	2020-02-05 07:00:00	2020-02-05 14:46:00	81	466	0	0	0	0	0	0	1	0	0	1	0	2	NULL	NULL	NULL	NULL	NULL	NULL	NULL	NULL	NULL	NULL	25	mcg	NULL	NULL	NULL	NULL	NULL	NULL	NULL	NULL	NULL
Nursing	Male	67	23.11	Lower GI	2020-07-20 10:01:09	2020-07-20 10:36:00	35	2020-07-20 10:29:44	7	2020-07-20 11:05:00	2020-07-20 11:08:16	3	2020-07-20 11:11:00	2020-07-20 12:35:00	67	84	NULL	NULL	NULL	NULL	NULL	NULL	NULL	NULL	NULL	NULL	NULL	0	NULL	NULL	NULL	NULL	NULL	NULL	NULL	NULL	NULL	NULL	NULL	NULL	NULL	NULL	NULL	NULL	NULL	NULL	NULL	NULL	NULL
Nursing	Male	67	23.75	Upper GI	2020-02-24 10:37:44	2020-02-24 10:56:00	19	2020-02-24 10:49:00	7	2020-02-24 11:01:00	2020-02-24 11:05:04	4	2020-02-24 11:09:00	2020-02-24 12:30:00	28	81	NULL	NULL	NULL	NULL	NULL	NULL	NULL	NULL	NULL	NULL	NULL	0	NULL	NULL	NULL	NULL	NULL	NULL	NULL	NULL	NULL	NULL	NULL	NULL	NULL	NULL	NULL	NULL	NULL	NULL	NULL	NULL	NULL
Nursing	Male	67	23.57	Lower GI	2020-08-03 13:40:41	2020-08-03 14:44:00	64	2020-08-03 14:28:00	16	2020-08-03 15:39:00	2020-08-03 15:42:48	3	2020-08-03 15:48:00	2020-08-03 16:05:00	122	17	NULL	NULL	NULL	NULL	NULL	NULL	NULL	NULL	NULL	NULL	NULL	0	NULL	NULL	NULL	NULL	NULL	NULL	NULL	NULL	NULL	NULL	NULL	NULL	NULL	NULL	NULL	NULL	NULL	NULL	NULL	NULL	NULL
Anesthesia	Male	67	22.96	Lower GI	2021-08-19 15:19:31	2021-08-19 15:26:00	7	2021-08-19 15:18:00	8	2021-08-19 15:40:00	2021-08-19 15:45:04	5	2021-08-19 15:50:00	2021-08-19 16:22:00	26	32	0	0	0	1	0	0	0	0	0	0	0	1	NULL	NULL	NULL	NULL	NULL	NULL	NULL	NULL	NULL	NULL	NULL	NULL	NULL	NULL	NULL	NULL	NULL	NULL	NULL	NULL	NULL
Nursing	Female	59	36.05	Upper GI	2020-07-27 09:39:10	2020-07-27 10:00:00	21	2020-07-27 09:48:25	12	2020-07-27 10:06:00	2020-07-27 10:12:14	6	2020-07-27 10:18:00	2020-07-27 10:52:00	33	34	0	0	0	1	0	0	1	0	0	1	1	4	NULL	NULL	NULL	NULL	NULL	NULL	NULL	NULL	NULL	NULL	NULL	NULL	NULL	NULL	NULL	NULL	NULL	NULL	NULL	NULL	NULL
Nursing	Female	53	30.9	Lower GI	2021-06-22 07:50:35	2021-06-22 08:07:00	17	2021-06-22 07:58:20	9	2021-06-22 08:34:00	2021-06-22 08:40:34	6	2021-06-22 08:34:00	2021-06-22 09:15:00	50	41	0	1	0	1	0	1	1	0	0	1	0	5	NULL	NULL	NULL	NULL	NULL	NULL	NULL	NULL	NULL	NULL	NULL	NULL	NULL	NULL	NULL	NULL	NULL	NULL	NULL	NULL	NULL
Nursing	Male	65	25.37	Lower GI	2020-11-04 15:14:58	2020-11-04 15:24:00	10	2020-11-04 15:16:00	8	2020-11-04 15:27:00	2020-11-04 15:32:07	5	2020-11-04 15:34:00	2020-11-04 16:15:00	18	41	0	0	0	0	0	0	1	0	0	1	0	2	NULL	NULL	NULL	NULL	NULL	NULL	NULL	NULL	NULL	NULL	NULL	NULL	NULL	NULL	NULL	NULL	NULL	NULL	NULL	NULL	NULL
Nursing	Female	64	32.6	Lower GI	2021-06-09 10:42:19	2021-06-09 11:11:00	29	2021-06-09 10:59:00	12	2021-06-09 11:25:00	2021-06-09 11:43:11	18	2021-06-09 11:30:00	2021-06-09 11:45:00	61	15	1	1	0	0	0	1	0	0	0	0	1	4	NULL	NULL	NULL	NULL	NULL	NULL	NULL	NULL	NULL	NULL	NULL	NULL	NULL	NULL	NULL	NULL	NULL	NULL	NULL	NULL	NULL
Nursing	Male	49	23.63	Upper GI	2021-04-19 07:08:04	2021-04-19 07:38:00	30	2021-04-19 07:30:00	8	2021-04-19 07:43:00	2021-04-19 07:50:22	7	2021-04-19 07:53:00	2021-04-19 08:34:00	42	41	0	0	0	0	1	0	0	0	0	0	0	1	NULL	NULL	NULL	NULL	NULL	NULL	NULL	NULL	NULL	NULL	NULL	NULL	NULL	NULL	NULL	NULL	NULL	NULL	NULL	NULL	NULL
Nursing	Male	49	26.87	Lower GI	2021-06-10 06:34:21	2021-06-10 07:04:00	30	2021-06-10 06:56:48	8	2021-06-10 07:26:00	2021-06-10 07:29:41	3	2021-06-10 07:34:00	2021-06-10 08:05:00	55	31	0	0	0	0	0	1	0	0	0	0	0	1	NULL	NULL	NULL	NULL	NULL	NULL	NULL	NULL	NULL	NULL	NULL	NULL	NULL	NULL	NULL	NULL	NULL	NULL	NULL	NULL	NULL
Nursing	Female	71	22.6	Lower GI	2020-08-12 06:18:31	2020-08-12 07:12:00	54	2020-08-12 07:06:14	6	2020-08-12 07:34:00	2020-08-12 07:38:46	4	2020-08-12 07:43:00	2020-08-12 08:16:00	80	33	NULL	NULL	NULL	NULL	NULL	NULL	NULL	NULL	NULL	NULL	NULL	0	NULL	NULL	NULL	NULL	NULL	NULL	NULL	NULL	NULL	NULL	NULL	NULL	NULL	NULL	NULL	NULL	NULL	NULL	NULL	NULL	NULL
Nursing	Male	74	27.32	Upper GI	2021-04-19 15:37:21	2021-04-19 16:05:00	28	2021-04-19 15:57:41	8	2021-04-19 16:10:00	2021-04-19 16:14:26	4	2021-04-19 16:19:00	2021-04-19 16:50:00	37	31	0	0	1	1	0	1	1	0	0	1	0	5	NULL	NULL	NULL	NULL	NULL	NULL	NULL	NULL	NULL	NULL	NULL	NULL	NULL	NULL	NULL	NULL	NULL	NULL	NULL	NULL	NULL
Nursing	Male	42	27.12	Lower GI	2020-01-02 06:42:17	2020-01-02 07:18:00	36	2020-01-02 07:11:47	7	2020-01-02 07:47:00	2020-01-02 07:51:24	4	2020-01-02 07:53:00	2020-01-02 08:16:00	69	23	NULL	NULL	NULL	NULL	NULL	NULL	NULL	NULL	NULL	NULL	NULL	0	NULL	NULL	NULL	NULL	NULL	NULL	NULL	NULL	NULL	NULL	NULL	NULL	NULL	NULL	NULL	NULL	NULL	NULL	NULL	NULL	NULL
Nursing	Female	71	19.03	Lower GI	2020-07-14 09:54:58	2020-07-14 10:33:00	39	2020-07-14 10:28:30	5	2020-07-14 11:10:00	2020-07-14 11:14:35	4	2020-07-14 11:20:00	2020-07-14 11:37:00	80	17	0	0	0	0	0	0	1	0	0	1	0	2	NULL	NULL	NULL	NULL	NULL	NULL	NULL	NULL	NULL	NULL	NULL	NULL	NULL	NULL	NULL	NULL	NULL	NULL	NULL	NULL	NULL
Nursing	Female	40	24.28	DUAL	2020-08-25 14:16:40	2020-08-25 14:30:00	14	2020-08-25 14:24:38	6	2020-08-25 14:58:00	2020-08-25 14:59:34	1	2020-08-25 15:15:00	2020-08-25 15:44:00	43	29	0	0	0	0	0	1	0	0	0	0	0	1	NULL	NULL	NULL	NULL	NULL	NULL	NULL	NULL	NULL	NULL	NULL	NULL	NULL	NULL	NULL	NULL	NULL	NULL	NULL	NULL	NULL
Anesthesia	Female	63	29.86	Lower GI	2021-10-14 09:15:45	2021-10-14 09:22:00	7	2021-10-14 09:14:00	8	2021-10-14 09:47:00	2021-10-14 09:54:20	7	2021-10-14 09:55:00	2021-10-14 11:13:00	39	78	NULL	NULL	NULL	NULL	NULL	NULL	NULL	NULL	NULL	NULL	NULL	0	NULL	NULL	NULL	NULL	NULL	NULL	NULL	NULL	NULL	NULL	NULL	NULL	NULL	NULL	NULL	NULL	NULL	NULL	NULL	NULL	NULL
Nursing	Female	40	36.05	Upper GI	2020-07-13 08:56:12	2020-07-13 09:12:00	16	2020-07-13 09:00:00	12	2020-07-13 09:26:00	2020-07-13 09:31:28	5	2020-07-13 09:34:00	2020-07-13 11:17:00	35	103	0	1	0	1	0	1	0	0	0	0	0	3	NULL	NULL	NULL	NULL	NULL	NULL	NULL	NULL	NULL	NULL	NULL	NULL	NULL	NULL	NULL	NULL	NULL	NULL	NULL	NULL	NULL
Nursing	Male	68	25.82	Upper GI	2021-05-19 15:59:49	2021-05-19 16:36:00	37	2021-05-19 16:31:25	5	2021-05-19 16:42:00	2021-05-19 16:49:32	7	2021-05-19 16:54:00	2021-05-19 17:31:00	50	37	1	0	0	0	0	1	1	1	0	1	0	5	NULL	NULL	NULL	NULL	NULL	NULL	NULL	NULL	NULL	NULL	NULL	NULL	NULL	NULL	NULL	NULL	NULL	NULL	NULL	NULL	NULL
Nursing	Male	68	26.63	Lower GI	2021-01-25 15:03:33	2021-01-25 15:33:00	30	2021-01-25 15:26:38	7	2021-01-25 15:53:00	2021-01-25 15:56:19	3	2021-01-25 16:00:00	2021-01-25 16:33:00	53	33	1	0	0	0	0	1	1	1	0	1	0	5	NULL	NULL	NULL	NULL	NULL	NULL	NULL	NULL	NULL	NULL	NULL	NULL	NULL	NULL	NULL	NULL	NULL	NULL	NULL	NULL	NULL
Nursing	Female	63	41.81	Upper GI	2021-05-06 10:32:43	2021-05-06 10:39:00	7	2021-05-06 10:30:00	9	2021-05-06 10:44:00	2021-05-06 10:48:00	4	2021-05-06 10:53:00	2021-05-06 11:44:00	16	51	1	1	0	1	0	1	1	0	0	1	0	6	NULL	NULL	NULL	NULL	NULL	NULL	NULL	NULL	NULL	NULL	NULL	NULL	NULL	NULL	NULL	NULL	NULL	NULL	NULL	NULL	NULL
Nursing	Male	65	26.61	Lower GI	2020-02-10 07:49:16	2020-02-10 08:45:00	56	2020-02-10 08:32:57	13	2020-02-10 08:59:00	2020-02-10 09:00:19	1	2020-02-10 09:05:00	2020-02-10 09:49:00	71	44	0	0	0	0	0	1	0	0	0	0	0	1	NULL	NULL	NULL	NULL	NULL	NULL	NULL	NULL	NULL	NULL	NULL	NULL	NULL	NULL	NULL	NULL	NULL	NULL	NULL	NULL	NULL
Nursing	Male	66	25.13	Lower GI	2020-02-10 13:17:41	2020-02-10 14:26:00	69	2020-02-10 14:15:32	11	2020-02-10 14:41:00	2020-02-10 14:45:33	4	2020-02-10 14:52:00	2020-02-10 15:35:00	88	43	NULL	NULL	NULL	NULL	NULL	NULL	NULL	NULL	NULL	NULL	NULL	0	NULL	NULL	NULL	NULL	NULL	NULL	NULL	NULL	NULL	NULL	NULL	NULL	NULL	NULL	NULL	NULL	NULL	NULL	NULL	NULL	NULL
Nursing	Female	65	24.21	Upper GI	2020-09-28 13:31:45	2020-09-28 14:16:00	45	2020-09-28 14:09:00	7	2020-09-28 14:25:00	2020-09-28 14:29:23	4	2020-09-28 14:30:00	2020-09-28 15:15:00	58	45	NULL	NULL	NULL	NULL	NULL	NULL	NULL	NULL	NULL	NULL	NULL	0	NULL	NULL	NULL	NULL	NULL	NULL	NULL	NULL	NULL	NULL	NULL	NULL	NULL	NULL	NULL	NULL	NULL	NULL	NULL	NULL	NULL
Nursing	Female	53	41.15	Lower GI	2021-05-14 08:38:51	2021-05-14 09:15:00	37	2021-05-14 09:11:45	4	2021-05-14 09:52:00	2021-05-14 09:56:43	4	2021-05-14 10:00:00	2021-05-14 10:40:00	78	40	0	0	0	0	0	1	0	1	0	0	0	2	NULL	NULL	NULL	NULL	NULL	NULL	NULL	NULL	NULL	NULL	NULL	NULL	NULL	NULL	NULL	NULL	NULL	NULL	NULL	NULL	NULL
Nursing	Female	61	27.78	Lower GI	2021-05-20 07:26:07	2021-05-20 08:07:00	41	2021-05-20 07:55:17	12	2021-05-20 08:11:00	2021-05-20 08:13:43	2	2021-05-20 08:18:00	2021-05-20 09:00:00	47	42	1	0	0	1	0	1	1	1	0	1	0	6	NULL	NULL	NULL	NULL	NULL	NULL	NULL	NULL	NULL	NULL	NULL	NULL	NULL	NULL	NULL	NULL	NULL	NULL	NULL	NULL	NULL
Nursing	Male	70	28.19	Upper GI	2020-01-14 11:48:01	2020-01-14 13:06:00	78	2020-01-14 13:00:45	6	2020-01-14 13:09:00	2020-01-14 13:12:06	3	2020-01-14 13:17:00	2020-01-14 13:45:00	84	28	0	0	0	0	0	1	1	1	0	1	0	4	NULL	NULL	NULL	NULL	NULL	NULL	NULL	NULL	NULL	NULL	NULL	NULL	NULL	NULL	NULL	NULL	NULL	NULL	NULL	NULL	NULL
Nursing	Male	76	22.15	Lower GI	2020-02-05 09:24:26	2020-02-05 10:18:00	54	2020-02-05 10:11:31	7	2020-02-05 10:45:00	2020-02-05 10:48:33	3	2020-02-05 11:00:00	2020-02-05 11:30:00	84	30	0	0	0	0	0	1	0	0	0	0	0	1	NULL	NULL	NULL	NULL	NULL	NULL	NULL	NULL	NULL	NULL	NULL	NULL	NULL	NULL	NULL	NULL	NULL	NULL	NULL	NULL	NULL
Nursing	Male	67	24.28	Lower GI	2020-02-27 09:12:45	2020-02-27 09:27:00	15	2020-02-27 09:16:31	11	2020-02-27 09:43:00	2020-02-27 09:49:00	6	2020-02-27 09:52:00	2020-02-27 10:15:00	37	23	0	0	0	0	0	1	0	0	0	0	0	1	NULL	NULL	NULL	NULL	NULL	NULL	NULL	NULL	NULL	NULL	NULL	NULL	NULL	NULL	NULL	NULL	NULL	NULL	NULL	NULL	NULL
Nursing	Female	64	23.44	Lower GI	2021-02-17 09:41:52	2021-02-17 10:26:00	45	2021-02-17 10:15:00	11	2021-02-17 10:43:00	2021-02-17 10:48:03	5	2021-02-17 10:50:00	2021-02-17 11:40:00	67	50	0	0	0	0	0	1	0	0	0	0	0	1	NULL	NULL	NULL	NULL	NULL	NULL	NULL	NULL	NULL	NULL	NULL	NULL	NULL	NULL	NULL	NULL	NULL	NULL	NULL	NULL	NULL
Nursing	Female	70	33.47	Upper GI	2020-03-05 15:51:28	2020-03-05 16:16:00	25	2020-03-05 16:07:02	9	2020-03-05 16:26:00	2020-03-05 16:29:57	3	2020-03-05 16:36:00	2020-03-05 17:10:00	38	34	1	0	0	1	0	1	1	0	0	1	0	5	NULL	NULL	NULL	NULL	NULL	NULL	NULL	NULL	NULL	NULL	NULL	NULL	NULL	NULL	NULL	NULL	NULL	NULL	NULL	NULL	NULL
Nursing	Female	56	28.34	Lower GI	2020-08-03 09:15:36	2020-08-03 09:48:00	33	2020-08-03 09:37:15	11	2020-08-03 10:07:00	2020-08-03 10:09:28	2	2020-08-03 10:12:00	2020-08-03 10:28:00	54	16	0	0	0	0	0	1	0	1	0	0	0	2	NULL	NULL	NULL	NULL	NULL	NULL	NULL	NULL	NULL	NULL	NULL	NULL	NULL	NULL	NULL	NULL	NULL	NULL	NULL	NULL	NULL
Nursing	Female	71	27.57	Lower GI	2021-03-30 15:13:13	2021-03-30 15:31:00	18	2021-03-30 15:27:00	4	2021-03-30 15:59:00	2021-03-30 16:04:36	5	2021-03-30 16:09:00	2021-03-30 17:35:00	51	86	0	1	0	1	0	0	0	0	0	0	0	2	NULL	NULL	NULL	NULL	NULL	NULL	NULL	NULL	NULL	NULL	NULL	NULL	NULL	NULL	NULL	NULL	NULL	NULL	NULL	NULL	NULL
Anesthesia	Female	67	33.45	Lower GI	2021-09-02 14:20:00	2021-09-02 14:28:00	8	2021-09-02 14:19:00	9	2021-09-02 15:00:00	2021-09-02 15:04:09	4	2021-09-02 15:07:00	2021-09-02 15:27:00	44	20	0	0	0	0	0	1	0	0	0	0	0	1	NULL	NULL	NULL	NULL	NULL	NULL	NULL	NULL	NULL	NULL	NULL	NULL	NULL	NULL	NULL	NULL	NULL	NULL	NULL	NULL	NULL
Anesthesia	Female	63	26.61	Lower GI	2021-10-22 13:32:18	2021-10-22 13:36:00	4	2021-10-22 13:30:00	6	2021-10-22 14:07:00	2021-10-22 14:11:19	4	2021-10-22 14:15:00	2021-10-22 15:02:00	39	47	0	0	0	1	0	0	0	0	0	0	0	1	NULL	NULL	NULL	NULL	NULL	NULL	NULL	NULL	NULL	NULL	NULL	NULL	NULL	NULL	NULL	NULL	NULL	NULL	NULL	NULL	NULL
Nursing	Female	71	23.03	Lower GI	2021-06-02 15:19:07	2021-06-02 15:49:00	30	2021-06-02 15:41:00	8	2021-06-02 16:03:00	2021-06-02 16:05:49	2	2021-06-02 16:11:00	2021-06-02 16:28:00	46	17	NULL	NULL	NULL	NULL	NULL	NULL	NULL	NULL	NULL	NULL	NULL	0	NULL	NULL	NULL	NULL	NULL	NULL	NULL	NULL	NULL	NULL	NULL	NULL	NULL	NULL	NULL	NULL	NULL	NULL	NULL	NULL	NULL
Anesthesia	Female	41	30.47	Upper GI	2021-10-13 16:20:50	2021-10-13 16:28:00	8	2021-10-13 16:19:00	9	2021-10-13 16:41:00	2021-10-13 16:44:38	3	2021-10-13 16:45:00	2021-10-13 17:10:00	24	25	1	0	0	1	0	0	0	0	0	0	0	2	NULL	NULL	NULL	NULL	NULL	NULL	NULL	NULL	NULL	NULL	NULL	NULL	NULL	NULL	NULL	NULL	NULL	NULL	NULL	NULL	NULL
Nursing	Female	65	51.32	Lower GI	2021-04-14 15:15:08	2021-04-14 15:36:00	21	2021-04-14 15:25:54	11	2021-04-14 15:54:00	2021-04-14 15:58:19	4	2021-04-14 16:06:00	2021-04-14 16:34:00	43	28	1	1	0	1	0	1	0	0	0	0	0	4	NULL	NULL	NULL	NULL	NULL	NULL	NULL	NULL	NULL	NULL	NULL	NULL	NULL	NULL	NULL	NULL	NULL	NULL	NULL	NULL	NULL
Nursing	Male	39	23.63	Upper GI	2020-03-02 09:37:53	2020-03-02 10:14:00	37	2020-03-02 10:07:22	7	2020-03-02 10:19:00	2020-03-02 10:22:31	3	2020-03-02 10:28:00	2020-03-02 11:05:00	45	37	0	0	0	1	0	0	1	1	0	1	0	4	NULL	NULL	NULL	NULL	NULL	NULL	NULL	NULL	NULL	NULL	NULL	NULL	NULL	NULL	NULL	NULL	NULL	NULL	NULL	NULL	NULL
Nursing	Female	42	38.97	Upper GI	2021-06-21 15:04:10	2021-06-21 15:43:00	39	2021-06-21 15:36:00	7	2021-06-21 16:06:00	2021-06-21 16:22:51	16	2021-06-21 16:15:00	2021-06-21 16:56:00	78	41	1	1	0	0	0	1	0	0	0	0	0	3	NULL	NULL	NULL	NULL	NULL	NULL	NULL	NULL	NULL	NULL	NULL	NULL	NULL	NULL	NULL	NULL	NULL	NULL	NULL	NULL	NULL
Nursing	Female	66	24.03	Lower GI	2020-08-18 09:22:09	2020-08-18 10:12:00	50	2020-08-18 10:04:01	8	2020-08-18 10:44:00	2020-08-18 10:49:42	5	2020-08-18 10:56:00	2020-08-18 11:01:00	87	5	NULL	NULL	NULL	NULL	NULL	NULL	NULL	NULL	NULL	NULL	NULL	0	NULL	NULL	NULL	NULL	NULL	NULL	NULL	NULL	NULL	NULL	NULL	NULL	NULL	NULL	NULL	NULL	NULL	NULL	NULL	NULL	NULL
Nursing	Female	57	28.29	Lower GI	2021-01-20 12:58:04	2021-01-20 13:10:00	12	2021-01-20 13:04:00	6	2021-01-20 13:33:00	2021-01-20 13:35:32	2	2021-01-20 13:41:00	2021-01-20 14:15:00	37	34	NULL	NULL	NULL	NULL	NULL	NULL	NULL	NULL	NULL	NULL	NULL	0	NULL	NULL	NULL	NULL	NULL	NULL	NULL	NULL	NULL	NULL	NULL	NULL	NULL	NULL	NULL	NULL	NULL	NULL	NULL	NULL	NULL
Nursing	Male	66	27.12	Lower GI	2021-02-24 06:43:32	2021-02-24 07:24:00	41	2021-02-24 07:14:00	10	2021-02-24 07:47:00	2021-02-24 07:49:41	2	2021-02-24 07:53:00	2021-02-24 08:27:00	66	34	0	0	0	1	0	1	0	0	0	0	0	2	NULL	NULL	NULL	NULL	NULL	NULL	NULL	NULL	NULL	NULL	NULL	NULL	NULL	NULL	NULL	NULL	NULL	NULL	NULL	NULL	NULL
Nursing	Female	62	31.24	DUAL	2020-07-21 10:48:53	2020-07-21 11:12:00	24	2020-07-21 11:02:27	10	2020-07-21 12:12:00	2020-07-21 12:17:15	5	2020-07-21 12:30:00	2020-07-21 12:47:00	89	17	1	1	0	1	0	1	1	1	0	1	0	7	NULL	NULL	NULL	NULL	NULL	NULL	NULL	NULL	NULL	NULL	NULL	NULL	NULL	NULL	NULL	NULL	NULL	NULL	NULL	NULL	NULL
Nursing	Female	70	19.59	Upper GI	2020-08-26 07:47:16	2020-08-26 08:15:00	28	2020-08-26 08:11:53	4	2020-08-26 08:24:00	2020-08-26 08:35:42	11	2020-08-26 08:30:00	2020-08-26 09:23:00	48	53	0	0	0	1	0	0	0	0	0	0	0	1	NULL	NULL	NULL	NULL	NULL	NULL	NULL	NULL	NULL	NULL	NULL	NULL	NULL	NULL	NULL	NULL	NULL	NULL	NULL	NULL	NULL
Nursing	Female	61	31.35	Lower GI	2021-02-15 07:17:16	2021-02-15 08:12:00	55	2021-02-15 08:05:00	7	2021-02-15 08:26:00	2021-02-15 08:31:05	5	2021-02-15 08:35:00	2021-02-15 09:23:00	74	48	NULL	NULL	NULL	NULL	NULL	NULL	NULL	NULL	NULL	NULL	NULL	0	NULL	NULL	NULL	NULL	NULL	NULL	NULL	NULL	NULL	NULL	NULL	NULL	NULL	NULL	NULL	NULL	NULL	NULL	NULL	NULL	NULL
Nursing	Female	62	27.02	Lower GI	2021-04-30 11:49:33	2021-04-30 12:03:00	14	2021-04-30 11:53:00	10	2021-04-30 12:25:00	2021-04-30 12:34:16	9	2021-04-30 12:33:00	2021-04-30 12:56:00	45	23	NULL	NULL	NULL	NULL	NULL	NULL	NULL	NULL	NULL	NULL	NULL	0	NULL	NULL	NULL	NULL	NULL	NULL	NULL	NULL	NULL	NULL	NULL	NULL	NULL	NULL	NULL	NULL	NULL	NULL	NULL	NULL	NULL
Nursing	Male	69	27.98	DUAL	2020-12-03 08:43:02	2020-12-03 09:10:00	27	2020-12-03 08:57:00	13	2020-12-03 09:37:00	2020-12-03 09:41:27	4	2020-12-03 09:45:00	2020-12-03 10:30:00	58	45	1	0	0	1	0	0	1	0	0	1	0	4	NULL	NULL	NULL	NULL	NULL	NULL	NULL	NULL	NULL	NULL	NULL	NULL	NULL	NULL	NULL	NULL	NULL	NULL	NULL	NULL	NULL
Nursing	Female	41	20.82	Lower GI	2020-10-29 16:37:22	2020-10-29 17:05:00	28	2020-10-29 16:47:03	18	2020-10-29 17:35:00	2020-10-29 17:40:39	5	2020-10-29 17:44:00	2020-10-29 18:16:00	63	32	NULL	NULL	NULL	NULL	NULL	NULL	NULL	NULL	NULL	NULL	NULL	0	NULL	NULL	NULL	NULL	NULL	NULL	NULL	NULL	NULL	NULL	NULL	NULL	NULL	NULL	NULL	NULL	NULL	NULL	NULL	NULL	NULL
Nursing	Female	62	40.74	Lower GI	2021-01-05 08:52:50	2021-01-05 09:08:00	16	2021-01-05 09:02:00	6	2021-01-05 09:22:00	2021-01-05 09:23:40	1	2021-01-05 09:27:00	2021-01-05 09:55:00	31	28	0	0	0	0	0	1	0	1	0	0	0	2	NULL	NULL	NULL	NULL	NULL	NULL	NULL	NULL	NULL	NULL	NULL	NULL	NULL	NULL	NULL	NULL	NULL	NULL	NULL	NULL	NULL
Nursing	Female	43	27.55	DUAL	2021-01-27 13:04:50	2021-01-27 14:33:00	89	2021-01-27 14:20:00	13	2021-01-27 15:01:00	2021-01-27 15:05:25	4	2021-01-27 15:15:00	2021-01-27 16:13:00	121	58	0	1	0	0	0	0	0	0	0	0	0	1	NULL	NULL	NULL	NULL	NULL	NULL	NULL	NULL	NULL	NULL	NULL	NULL	NULL	NULL	NULL	NULL	NULL	NULL	NULL	NULL	NULL
Nursing	Female	60	25.82	Lower GI	2021-05-21 11:00:19	2021-05-21 11:41:00	41	2021-05-21 11:32:00	9	2021-05-21 11:59:00	2021-05-21 12:00:17	1	2021-05-21 12:05:00	2021-05-21 12:44:00	60	39	NULL	NULL	NULL	NULL	NULL	NULL	NULL	NULL	NULL	NULL	NULL	0	NULL	NULL	NULL	NULL	NULL	NULL	NULL	NULL	NULL	NULL	NULL	NULL	NULL	NULL	NULL	NULL	NULL	NULL	NULL	NULL	NULL
Nursing	Male	87	19.94	Lower GI	2020-02-05 12:46:46	2020-02-05 13:06:00	20	2020-02-05 13:02:53	4	2020-02-05 13:24:00	2020-02-05 13:28:52	4	2020-02-05 13:30:00	2020-02-05 14:26:00	42	56	0	0	1	1	0	1	1	0	0	1	1	6	NULL	NULL	NULL	NULL	NULL	NULL	NULL	NULL	NULL	NULL	NULL	NULL	NULL	NULL	NULL	NULL	NULL	NULL	NULL	NULL	NULL
Nursing	Female	62	32.28	Lower GI	2020-06-24 08:55:01	2020-06-24 09:14:00	19	2020-06-24 09:05:00	9	2020-06-24 09:46:00	2020-06-24 09:47:33	1	2020-06-24 09:54:00	2020-06-24 10:52:00	52	58	NULL	NULL	NULL	NULL	NULL	NULL	NULL	NULL	NULL	NULL	NULL	0	NULL	NULL	NULL	NULL	NULL	NULL	NULL	NULL	NULL	NULL	NULL	NULL	NULL	NULL	NULL	NULL	NULL	NULL	NULL	NULL	NULL
Nursing	Female	71	20.85	Lower GI	2021-05-17 15:00:22	2021-05-17 15:48:00	48	2021-05-17 15:41:41	7	2021-05-17 16:15:00	2021-05-17 16:19:51	4	2021-05-17 16:21:00	2021-05-17 16:45:00	79	24	0	0	0	0	0	0	0	1	0	0	0	1	NULL	NULL	NULL	NULL	NULL	NULL	NULL	NULL	NULL	NULL	NULL	NULL	NULL	NULL	NULL	NULL	NULL	NULL	NULL	NULL	NULL
Nursing	Female	51	16.82	Lower GI	2020-09-14 13:00:52	2020-09-14 13:16:00	16	2020-09-14 13:07:11	9	2020-09-14 13:29:00	2020-09-14 13:33:40	4	2020-09-14 13:38:00	2020-09-14 16:00:00	33	142	NULL	NULL	NULL	NULL	NULL	NULL	NULL	NULL	NULL	NULL	NULL	0	4	mg	NULL	NULL	NULL	NULL	NULL	NULL	NULL	NULL	NULL	NULL	NULL	NULL	NULL	NULL	NULL	NULL	NULL	NULL	NULL
Nursing	Male	67	36.87	Lower GI	2020-06-12 10:45:50	2020-06-12 11:01:00	16	2020-06-12 10:51:09	10	2020-06-12 11:40:00	2020-06-12 11:42:55	2	2020-06-12 11:51:00	2020-06-12 12:46:00	57	55	1	0	0	0	0	0	1	0	0	1	0	3	NULL	NULL	NULL	NULL	NULL	NULL	NULL	NULL	NULL	NULL	NULL	NULL	NULL	NULL	NULL	NULL	NULL	NULL	NULL	NULL	NULL
Nursing	Female	50	25.75	Lower GI	2021-04-26 12:02:56	2021-04-26 12:18:00	16	2021-04-26 12:09:56	9	2021-04-26 12:28:00	2021-04-26 12:30:33	2	2021-04-26 12:35:00	2021-04-26 13:20:00	28	45	NULL	NULL	NULL	NULL	NULL	NULL	NULL	NULL	NULL	NULL	NULL	0	NULL	NULL	NULL	NULL	NULL	NULL	NULL	NULL	NULL	NULL	NULL	NULL	NULL	NULL	NULL	NULL	NULL	NULL	NULL	NULL	NULL
Nursing	Female	77	34.44	Lower GI	2020-10-21 13:46:27	2020-10-21 14:12:00	26	2020-10-21 14:03:00	9	2020-10-21 14:27:00	2020-10-21 14:32:08	5	2020-10-21 14:37:00	2020-10-21 15:02:00	46	25	0	1	0	0	0	1	0	0	0	0	0	2	NULL	NULL	NULL	NULL	NULL	NULL	NULL	NULL	NULL	NULL	NULL	NULL	NULL	NULL	NULL	NULL	NULL	NULL	NULL	NULL	NULL
Nursing	Male	67	26.64	Lower GI	2021-06-09 13:38:00	2021-06-09 13:53:00	15	2021-06-09 13:43:00	10	2021-06-09 14:04:00	2021-06-09 14:09:21	5	2021-06-09 14:14:00	2021-06-09 14:45:00	31	31	0	0	0	0	0	1	0	0	0	0	0	1	NULL	NULL	NULL	NULL	NULL	NULL	NULL	NULL	NULL	NULL	NULL	NULL	NULL	NULL	NULL	NULL	NULL	NULL	NULL	NULL	NULL
Nursing	Female	64	25.82	Lower GI	2021-03-25 10:41:59	2021-03-25 11:18:00	37	2021-03-25 11:11:00	7	2021-03-25 11:40:00	2021-03-25 11:43:55	3	2021-03-25 11:50:00	2021-03-25 12:25:00	62	35	NULL	NULL	NULL	NULL	NULL	NULL	NULL	NULL	NULL	NULL	NULL	0	NULL	NULL	NULL	NULL	NULL	NULL	NULL	NULL	NULL	NULL	NULL	NULL	NULL	NULL	NULL	NULL	NULL	NULL	NULL	NULL	NULL
Anesthesia	Female	64	25.23	Upper GI	2021-08-07 09:22:43	2021-08-07 09:41:00	19	2021-08-07 00:03:00	578	2021-08-07 09:44:00	2021-08-07 10:14:26	30	2021-08-07 07:00:00	2021-08-07 10:00:00	52	180	0	0	0	0	0	0	0	1	0	0	0	1	NULL	NULL	NULL	NULL	NULL	NULL	NULL	NULL	NULL	NULL	100	mcg	NULL	NULL	NULL	NULL	NULL	NULL	NULL	NULL	NULL
Nursing	Female	63	31.71	Lower GI	2020-02-19 07:16:35	2020-02-19 07:44:00	28	2020-02-19 07:38:36	6	2020-02-19 07:58:00	2020-02-19 08:00:43	2	2020-02-19 08:06:00	2020-02-19 09:31:00	44	85	0	0	0	1	0	1	0	0	1	0	0	3	NULL	NULL	NULL	NULL	NULL	NULL	NULL	NULL	NULL	NULL	NULL	NULL	NULL	NULL	NULL	NULL	NULL	NULL	NULL	NULL	NULL
Nursing	Male	38	19.77	DUAL	2020-03-17 10:03:07	2020-03-17 10:40:00	37	2020-03-17 10:34:49	6	2020-03-17 11:34:00	2020-03-17 11:39:59	5	2020-03-17 11:46:00	2020-03-17 12:34:00	96	48	0	0	0	0	0	0	1	0	0	1	0	2	NULL	NULL	NULL	NULL	NULL	NULL	NULL	NULL	NULL	NULL	NULL	NULL	NULL	NULL	NULL	NULL	NULL	NULL	NULL	NULL	NULL
Nursing	Male	66	25.1	Lower GI	2021-02-19 09:36:10	2021-02-19 09:48:00	12	2021-02-19 09:39:36	9	2021-02-19 10:07:00	2021-02-19 10:10:31	3	2021-02-19 10:13:00	2021-02-19 10:35:00	34	22	NULL	NULL	NULL	NULL	NULL	NULL	NULL	NULL	NULL	NULL	NULL	0	NULL	NULL	NULL	NULL	NULL	NULL	NULL	NULL	NULL	NULL	NULL	NULL	NULL	NULL	NULL	NULL	NULL	NULL	NULL	NULL	NULL
Anesthesia	Male	54	32.6	Lower GI	2021-08-25 10:10:00	2021-08-25 10:12:00	2	2021-08-25 10:08:00	4	2021-08-25 10:24:00	2021-08-25 10:26:06	2	2021-08-25 10:30:00	2021-08-25 11:10:00	16	40	0	0	0	1	0	1	0	0	0	0	0	2	NULL	NULL	NULL	NULL	NULL	NULL	NULL	NULL	NULL	NULL	NULL	NULL	NULL	NULL	NULL	NULL	NULL	NULL	NULL	NULL	NULL
Anesthesia	Male	61	21.43	Upper GI	2021-09-08 09:39:01	2021-09-08 09:45:00	6	2021-09-08 09:38:00	7	2021-09-08 09:47:00	2021-09-08 09:50:58	3	2021-09-08 10:00:00	2021-09-08 10:33:00	11	33	0	0	1	0	0	1	0	0	0	0	0	2	NULL	NULL	NULL	NULL	NULL	NULL	NULL	NULL	NULL	NULL	NULL	NULL	NULL	NULL	NULL	NULL	NULL	NULL	NULL	NULL	NULL
Nursing	Female	48	23.32	DUAL	2020-06-30 09:17:54	2020-06-30 10:17:00	60	2020-06-30 10:08:16	9	2020-06-30 10:43:00	2020-06-30 10:50:22	7	2020-06-30 10:52:00	2020-06-30 11:30:00	93	38	0	0	0	0	0	0	1	1	0	1	0	3	NULL	NULL	NULL	NULL	NULL	NULL	NULL	NULL	NULL	NULL	NULL	NULL	NULL	NULL	NULL	NULL	NULL	NULL	NULL	NULL	NULL
Nursing	Female	57	27.46	Lower GI	2020-01-03 09:53:20	2020-01-03 10:45:00	52	2020-01-03 10:35:55	10	2020-01-03 11:01:00	2020-01-03 11:06:23	5	2020-01-03 11:11:00	2020-01-03 11:43:00	73	32	NULL	NULL	NULL	NULL	NULL	NULL	NULL	NULL	NULL	NULL	NULL	0	NULL	NULL	NULL	NULL	NULL	NULL	NULL	NULL	NULL	NULL	NULL	NULL	NULL	NULL	NULL	NULL	NULL	NULL	NULL	NULL	NULL
Nursing	Male	66	15.19	DUAL	2020-02-03 16:38:41	2020-02-03 17:34:00	56	2020-02-03 17:21:48	13	2020-02-03 18:27:00	2020-02-03 18:44:06	17	2020-02-03 16:00:00	2020-02-03 19:44:00	126	224	NULL	NULL	NULL	NULL	NULL	NULL	NULL	NULL	NULL	NULL	NULL	0	NULL	NULL	NULL	NULL	NULL	NULL	NULL	NULL	NULL	NULL	125	mcg	NULL	NULL	NULL	NULL	NULL	NULL	NULL	NULL	NULL
Nursing	Male	61	22.52	Lower GI	2020-01-03 14:28:01	2020-01-03 15:15:00	47	2020-01-03 15:06:00	9	2020-01-03 15:29:00	2020-01-03 15:41:11	12	2020-01-03 15:36:00	2020-01-03 16:28:00	73	52	NULL	NULL	NULL	NULL	NULL	NULL	NULL	NULL	NULL	NULL	NULL	0	NULL	NULL	NULL	NULL	NULL	NULL	NULL	NULL	NULL	NULL	NULL	NULL	NULL	NULL	NULL	NULL	NULL	NULL	NULL	NULL	NULL
Nursing	Female	50	14.6	Upper GI	2021-05-17 17:03:18	2021-05-17 17:31:00	28	2021-05-17 17:10:33	21	2021-05-17 17:46:00	2021-05-17 17:48:11	2	2021-05-17 17:55:00	2021-05-17 19:30:00	45	95	NULL	NULL	NULL	NULL	NULL	NULL	NULL	NULL	NULL	NULL	NULL	0	4	mg	NULL	NULL	NULL	NULL	NULL	NULL	NULL	NULL	NULL	NULL	NULL	NULL	NULL	NULL	NULL	NULL	NULL	NULL	NULL
Nursing	Female	62	36.3	Lower GI	2020-11-04 07:00:53	2020-11-04 07:12:00	12	2020-11-04 07:06:09	6	2020-11-04 07:30:00	2020-11-04 07:34:56	4	2020-11-04 07:39:00	2020-11-04 08:15:00	34	36	0	1	0	0	0	0	0	0	0	0	0	1	NULL	NULL	NULL	NULL	NULL	NULL	NULL	NULL	NULL	NULL	NULL	NULL	NULL	NULL	NULL	NULL	NULL	NULL	NULL	NULL	NULL
Nursing	Male	61	33.91	Lower GI	2021-01-15 10:40:40	2021-01-15 11:08:00	28	2021-01-15 11:00:00	8	2021-01-15 11:27:00	2021-01-15 11:32:19	5	2021-01-15 11:30:00	2021-01-15 12:11:00	52	41	NULL	NULL	NULL	NULL	NULL	NULL	NULL	NULL	NULL	NULL	NULL	0	NULL	NULL	NULL	NULL	NULL	NULL	NULL	NULL	NULL	NULL	NULL	NULL	NULL	NULL	NULL	NULL	NULL	NULL	NULL	NULL	NULL
Nursing	Female	61	26.61	Lower GI	2020-03-13 10:19:38	2020-03-13 10:38:00	19	2020-03-13 10:30:45	8	2020-03-13 11:16:00	2020-03-13 11:18:24	2	2020-03-13 11:20:00	2020-03-13 11:50:00	59	30	NULL	NULL	NULL	NULL	NULL	NULL	NULL	NULL	NULL	NULL	NULL	0	NULL	NULL	NULL	NULL	NULL	NULL	NULL	NULL	NULL	NULL	NULL	NULL	NULL	NULL	NULL	NULL	NULL	NULL	NULL	NULL	NULL
Nursing	Female	64	36.87	Lower GI	2021-03-10 06:38:39	2021-03-10 07:07:00	29	2021-03-10 06:59:04	8	2021-03-10 07:33:00	2021-03-10 07:35:25	2	2021-03-10 07:42:00	2021-03-10 08:23:00	57	41	0	1	0	0	0	1	0	0	0	0	0	2	NULL	NULL	NULL	NULL	NULL	NULL	NULL	NULL	NULL	NULL	NULL	NULL	NULL	NULL	NULL	NULL	NULL	NULL	NULL	NULL	NULL
Nursing	Female	68	26.26	Lower GI	2020-01-28 09:15:00	2020-01-28 09:31:00	16	2020-01-28 09:20:00	11	2020-01-28 09:51:00	2020-01-28 09:55:00	4	2020-01-28 10:00:00	2020-01-28 10:39:00	40	39	NULL	NULL	NULL	NULL	NULL	NULL	NULL	NULL	NULL	NULL	NULL	0	NULL	NULL	NULL	NULL	NULL	NULL	NULL	NULL	NULL	NULL	NULL	NULL	NULL	NULL	NULL	NULL	NULL	NULL	NULL	NULL	NULL
Nursing	Female	69	34.75	Lower GI	2020-01-23 08:32:16	2020-01-23 09:19:00	47	2020-01-23 09:10:00	9	2020-01-23 09:31:00	2020-01-23 09:35:00	4	2020-01-23 09:38:00	2020-01-23 10:22:00	63	44	0	0	0	1	0	1	0	1	0	0	0	3	NULL	NULL	NULL	NULL	NULL	NULL	NULL	NULL	NULL	NULL	NULL	NULL	NULL	NULL	NULL	NULL	NULL	NULL	NULL	NULL	NULL
Anesthesia	Male	60	27.22	Lower GI	2021-08-30 16:16:23	2021-08-30 16:21:00	5	2021-08-30 16:14:00	7	2021-08-30 16:40:00	2021-08-30 16:44:15	4	2021-08-30 16:46:00	2021-08-30 17:11:00	28	25	0	1	0	1	0	1	1	1	0	1	0	6	NULL	NULL	NULL	NULL	NULL	NULL	NULL	NULL	NULL	NULL	NULL	NULL	NULL	NULL	NULL	NULL	NULL	NULL	NULL	NULL	NULL
Nursing	Female	54	24.13	Lower GI	2020-01-30 08:54:17	2020-01-30 09:21:00	27	2020-01-30 09:12:08	9	2020-01-30 09:38:00	2020-01-30 09:42:31	4	2020-01-30 09:47:00	2020-01-30 11:05:00	48	78	0	0	0	0	0	1	0	0	0	0	0	1	NULL	NULL	NULL	NULL	NULL	NULL	NULL	NULL	NULL	NULL	NULL	NULL	NULL	NULL	NULL	NULL	NULL	NULL	NULL	NULL	NULL
Nursing	Male	82	27.26	Lower GI	2021-05-05 13:11:26	2021-05-05 13:48:00	37	2021-05-05 13:37:30	11	2021-05-05 14:09:00	2021-05-05 14:11:50	2	2021-05-05 14:19:00	2021-05-05 14:39:00	60	20	0	0	1	0	0	1	1	0	0	1	0	4	NULL	NULL	NULL	NULL	NULL	NULL	NULL	NULL	NULL	NULL	NULL	NULL	NULL	NULL	NULL	NULL	NULL	NULL	NULL	NULL	NULL
Nursing	Female	62	29.08	Upper GI	2020-02-13 14:22:08	2020-02-13 14:47:00	25	2020-02-13 14:40:41	7	2020-02-13 14:53:00	2020-02-13 14:54:18	1	2020-02-13 14:59:00	2020-02-13 15:56:00	32	57	0	0	0	0	0	0	0	0	0	0	0	0	NULL	NULL	NULL	NULL	NULL	NULL	NULL	NULL	NULL	NULL	NULL	NULL	NULL	NULL	NULL	NULL	NULL	NULL	NULL	NULL	NULL
Anesthesia	Female	74	21.13	Lower GI	2021-09-03 11:20:57	2021-09-03 11:27:00	7	2021-09-03 11:19:00	8	2021-09-03 11:45:00	2021-09-03 11:47:22	2	2021-09-03 11:51:00	2021-09-03 12:15:00	27	24	0	0	0	1	0	0	1	0	0	1	0	3	NULL	NULL	NULL	NULL	NULL	NULL	NULL	NULL	NULL	NULL	NULL	NULL	NULL	NULL	NULL	NULL	NULL	NULL	NULL	NULL	NULL
Nursing	Male	40	29.03	Lower GI	2021-06-15 07:00:00	2021-06-15 07:15:00	15	2021-06-15 07:09:00	6	2021-06-15 07:52:00	2021-06-15 07:56:49	4	2021-06-15 08:00:00	2021-06-15 08:30:00	56	30	0	1	0	0	0	0	0	1	0	0	0	2	NULL	NULL	NULL	NULL	NULL	NULL	NULL	NULL	NULL	NULL	NULL	NULL	NULL	NULL	NULL	NULL	NULL	NULL	NULL	NULL	NULL
Nursing	Male	56	24.41	Lower GI	2021-02-19 11:07:16	2021-02-19 11:36:00	29	2021-02-19 11:25:50	11	2021-02-19 12:24:00	2021-02-19 12:31:03	7	2021-02-19 12:38:00	2021-02-19 13:29:00	84	51	0	0	0	0	0	1	0	0	0	0	0	1	NULL	NULL	NULL	NULL	NULL	NULL	NULL	NULL	NULL	NULL	NULL	NULL	NULL	NULL	NULL	NULL	NULL	NULL	NULL	NULL	NULL
Anesthesia	Female	55	35.96	DUAL	2021-09-23 13:50:14	2021-09-23 13:58:00	8	2021-09-23 13:50:00	8	2021-09-23 14:25:00	2021-09-23 14:28:21	3	2021-09-23 14:33:00	2021-09-23 16:48:00	38	135	0	1	0	1	0	1	0	1	0	0	0	4	NULL	NULL	NULL	NULL	NULL	NULL	NULL	NULL	NULL	NULL	NULL	NULL	NULL	NULL	NULL	NULL	NULL	NULL	NULL	NULL	NULL
Nursing	Female	67	35.24	DUAL	2020-02-13 09:54:37	2020-02-13 10:27:00	33	2020-02-13 10:18:00	9	2020-02-13 11:15:00	2020-02-13 11:17:23	2	2020-02-13 11:24:00	2020-02-13 11:54:00	83	30	0	0	0	0	0	1	0	0	0	0	0	1	NULL	NULL	NULL	NULL	NULL	NULL	NULL	NULL	NULL	NULL	NULL	NULL	NULL	NULL	NULL	NULL	NULL	NULL	NULL	NULL	NULL
Anesthesia	Male	62	21.42	Lower GI	2021-08-23 16:21:46	2021-08-23 16:29:00	8	2021-08-23 16:24:00	5	2021-08-23 16:53:00	2021-08-23 16:57:48	4	2021-08-23 17:00:00	2021-08-23 17:28:00	36	28	0	0	0	1	1	0	0	0	0	0	0	2	NULL	NULL	NULL	NULL	NULL	NULL	NULL	NULL	NULL	NULL	NULL	NULL	NULL	NULL	NULL	NULL	NULL	NULL	NULL	NULL	NULL
Anesthesia	Female	61	30.18	Lower GI	2021-09-15 09:26:44	2021-09-15 09:38:00	12	2021-09-15 09:31:00	7	2021-09-15 09:54:00	2021-09-15 10:16:03	22	2021-09-15 10:00:00	2021-09-15 10:25:00	50	25	NULL	NULL	NULL	NULL	NULL	NULL	NULL	NULL	NULL	NULL	NULL	0	NULL	NULL	NULL	NULL	NULL	NULL	NULL	NULL	NULL	NULL	NULL	NULL	NULL	NULL	NULL	NULL	NULL	NULL	NULL	NULL	NULL
Nursing	Female	52	27.41	Lower GI	2020-05-26 10:56:20	2020-05-26 11:33:00	37	2020-05-26 11:19:50	14	2020-05-26 12:16:00	2020-05-26 12:24:15	8	2020-05-26 12:29:00	2020-05-26 13:10:00	88	41	NULL	NULL	NULL	NULL	NULL	NULL	NULL	NULL	NULL	NULL	NULL	0	NULL	NULL	NULL	NULL	NULL	NULL	NULL	NULL	NULL	NULL	NULL	NULL	NULL	NULL	NULL	NULL	NULL	NULL	NULL	NULL	NULL
Anesthesia	Female	67	23.44	Lower GI	2021-09-01 11:23:00	2021-09-01 11:27:00	4	2021-09-01 11:23:00	4	2021-09-01 11:40:00	2021-09-01 11:41:00	1	2021-09-01 11:45:00	2021-09-01 12:42:00	18	57	0	0	0	0	0	1	0	0	0	0	0	1	NULL	NULL	NULL	NULL	NULL	NULL	NULL	NULL	NULL	NULL	NULL	NULL	NULL	NULL	NULL	NULL	NULL	NULL	NULL	NULL	NULL
Nursing	Female	60	32.61	Upper GI	2021-02-02 13:18:39	2021-02-02 13:47:00	29	2021-02-02 13:42:13	5	2021-02-02 13:51:00	2021-02-02 13:58:53	7	2021-02-02 14:06:00	2021-02-02 14:43:00	40	37	0	0	0	0	0	0	0	1	0	0	0	1	NULL	NULL	NULL	NULL	NULL	NULL	NULL	NULL	NULL	NULL	NULL	NULL	NULL	NULL	NULL	NULL	NULL	NULL	NULL	NULL	NULL
Nursing	Female	59	29.52	Upper GI	2020-08-26 09:45:26	2020-08-26 10:22:00	37	2020-08-26 10:12:17	10	2020-08-26 10:27:00	2020-08-26 10:30:10	3	2020-08-26 10:36:00	2020-08-26 11:00:00	45	24	0	0	0	0	0	1	1	0	0	1	0	3	NULL	NULL	NULL	NULL	NULL	NULL	NULL	NULL	NULL	NULL	NULL	NULL	NULL	NULL	NULL	NULL	NULL	NULL	NULL	NULL	NULL
Nursing	Male	58	23.68	Lower GI	2020-01-23 14:12:49	2020-01-23 15:08:00	56	2020-01-23 15:00:00	8	2020-01-23 15:33:00	2020-01-23 15:39:37	6	2020-01-23 15:38:00	2020-01-23 16:27:00	87	49	NULL	NULL	NULL	NULL	NULL	NULL	NULL	NULL	NULL	NULL	NULL	0	NULL	NULL	NULL	NULL	NULL	NULL	NULL	NULL	NULL	NULL	NULL	NULL	NULL	NULL	NULL	NULL	NULL	NULL	NULL	NULL	NULL
Nursing	Male	68	21.81	Lower GI	2021-06-17 07:36:13	2021-06-17 08:07:00	31	2021-06-17 07:58:30	9	2021-06-17 08:25:00	2021-06-17 08:28:36	3	2021-06-17 08:32:00	2021-06-17 08:50:00	52	18	0	0	0	0	0	1	0	0	0	0	0	1	NULL	NULL	NULL	NULL	NULL	NULL	NULL	NULL	NULL	NULL	NULL	NULL	NULL	NULL	NULL	NULL	NULL	NULL	NULL	NULL	NULL
Anesthesia	Female	57	29.94	Lower GI	2021-10-11 09:59:00	2021-10-11 10:03:00	4	2021-10-11 09:59:00	4	2021-10-11 10:32:00	2021-10-11 10:34:00	2	2021-10-11 10:38:00	2021-10-11 11:21:00	35	43	0	1	0	1	0	1	0	0	0	0	0	3	NULL	NULL	NULL	NULL	NULL	NULL	NULL	NULL	NULL	NULL	NULL	NULL	NULL	NULL	NULL	NULL	NULL	NULL	NULL	NULL	NULL
Nursing	Male	65	24.33	Lower GI	2021-04-29 12:51:42	2021-04-29 13:49:00	58	2021-04-29 13:37:20	12	2021-04-29 14:12:00	2021-04-29 14:17:06	5	2021-04-29 14:22:00	2021-04-29 15:05:00	86	43	0	0	0	1	1	1	1	0	0	1	0	5	NULL	NULL	NULL	NULL	NULL	NULL	NULL	NULL	NULL	NULL	NULL	NULL	NULL	NULL	NULL	NULL	NULL	NULL	NULL	NULL	NULL
Nursing	Male	69	23.75	Lower GI	2021-05-05 06:43:17	2021-05-05 07:20:00	37	2021-05-05 07:14:00	6	2021-05-05 07:33:00	2021-05-05 07:36:17	3	2021-05-05 07:39:00	2021-05-05 07:59:00	53	20	NULL	NULL	NULL	NULL	NULL	NULL	NULL	NULL	NULL	NULL	NULL	0	NULL	NULL	NULL	NULL	NULL	NULL	NULL	NULL	NULL	NULL	NULL	NULL	NULL	NULL	NULL	NULL	NULL	NULL	NULL	NULL	NULL
Nursing	Male	49	34.21	DUAL	2020-07-27 10:46:32	2020-07-27 11:09:00	23	2020-07-27 10:59:53	10	2020-07-27 11:43:00	2020-07-27 11:45:44	2	2020-07-27 11:50:00	2020-07-27 12:23:00	59	33	0	1	1	0	0	1	1	0	0	1	0	5	NULL	NULL	NULL	NULL	NULL	NULL	NULL	NULL	NULL	NULL	NULL	NULL	NULL	NULL	NULL	NULL	NULL	NULL	NULL	NULL	NULL
Nursing	Female	61	21.26	DUAL	2021-05-20 14:57:26	2021-05-20 15:29:00	32	2021-05-20 15:12:00	17	2021-05-20 15:52:00	2021-05-20 15:56:06	4	2021-05-20 16:01:00	2021-05-20 16:49:00	59	48	0	0	0	1	0	1	0	0	0	0	0	2	4	mg	NULL	NULL	NULL	NULL	NULL	NULL	NULL	NULL	NULL	NULL	NULL	NULL	NULL	NULL	NULL	NULL	NULL	NULL	NULL
Nursing	Female	64	23.17	Lower GI	2020-07-22 10:05:42	2020-07-22 10:45:00	40	2020-07-22 10:37:20	8	2020-07-22 11:03:00	2020-07-22 11:04:21	1	2020-07-22 11:15:00	2020-07-22 11:40:00	59	25	0	0	0	1	0	0	0	0	0	0	0	1	NULL	NULL	NULL	NULL	NULL	NULL	NULL	NULL	NULL	NULL	NULL	NULL	NULL	NULL	NULL	NULL	NULL	NULL	NULL	NULL	NULL
Nursing	Female	35	16.81	Upper GI	2020-03-03 13:20:55	2020-03-03 14:47:00	87	2020-03-03 14:35:00	12	2020-03-03 14:52:00	2020-03-03 14:55:00	3	2020-03-03 15:00:00	2020-03-03 16:40:00	95	100	0	0	0	0	0	0	0	1	0	0	0	1	NULL	NULL	NULL	NULL	NULL	NULL	NULL	NULL	NULL	NULL	NULL	NULL	NULL	NULL	NULL	NULL	NULL	NULL	NULL	NULL	NULL
Nursing	Female	71	26.09	DUAL	2020-01-27 13:47:11	2020-01-27 14:14:00	27	2020-01-27 14:08:07	6	2020-01-27 14:38:00	2020-01-27 14:40:29	2	2020-01-27 14:45:00	2020-01-27 15:00:00	53	15	0	0	0	0	0	1	0	0	0	0	0	1	NULL	NULL	NULL	NULL	NULL	NULL	NULL	NULL	NULL	NULL	NULL	NULL	NULL	NULL	NULL	NULL	NULL	NULL	NULL	NULL	NULL
Nursing	Male	50	29.41	Lower GI	2020-02-25 13:00:13	2020-02-25 13:54:00	54	2020-02-25 13:34:07	20	2020-02-25 14:11:00	2020-02-25 14:14:34	3	2020-02-25 14:24:00	2020-02-25 15:12:00	74	48	0	0	0	1	0	1	0	0	0	0	0	2	NULL	NULL	NULL	NULL	NULL	NULL	NULL	NULL	NULL	NULL	NULL	NULL	NULL	NULL	NULL	NULL	NULL	NULL	NULL	NULL	NULL
Nursing	Female	45	26.63	Upper GI	2021-05-06 15:58:13	2021-05-06 16:34:00	36	2021-05-06 16:22:00	12	2021-05-06 16:41:00	2021-05-06 16:44:08	3	2021-05-06 16:47:00	2021-05-06 17:29:00	46	42	NULL	NULL	NULL	NULL	NULL	NULL	NULL	NULL	NULL	NULL	NULL	0	NULL	NULL	NULL	NULL	NULL	NULL	NULL	NULL	NULL	NULL	NULL	NULL	NULL	NULL	NULL	NULL	NULL	NULL	NULL	NULL	NULL
Nursing	Male	52	23.09	Lower GI	2021-02-19 10:51:45	2021-02-19 10:57:00	6	2021-02-19 10:53:00	4	2021-02-19 11:14:00	2021-02-19 11:16:52	2	2021-02-19 11:21:00	2021-02-19 12:00:00	25	39	NULL	NULL	NULL	NULL	NULL	NULL	NULL	NULL	NULL	NULL	NULL	0	NULL	NULL	NULL	NULL	NULL	NULL	NULL	NULL	NULL	NULL	NULL	NULL	NULL	NULL	NULL	NULL	NULL	NULL	NULL	NULL	NULL
Nursing	Male	52	27.28	Lower GI	2020-11-23 09:11:01	2020-11-23 09:30:00	19	2020-11-23 09:18:25	12	2020-11-23 09:48:00	2020-11-23 09:52:52	4	2020-11-23 09:56:00	2020-11-23 10:22:00	41	26	0	0	0	1	0	0	0	0	0	0	0	1	NULL	NULL	NULL	NULL	NULL	NULL	NULL	NULL	NULL	NULL	NULL	NULL	NULL	NULL	NULL	NULL	NULL	NULL	NULL	NULL	NULL
Nursing	Male	61	29.98	Upper GI	2020-01-27 08:35:39	2020-01-27 09:03:00	28	2020-01-27 08:56:00	7	2020-01-27 09:08:00	2020-01-27 09:12:41	4	2020-01-27 09:19:00	2020-01-27 10:33:00	37	74	0	0	0	0	0	1	1	0	0	1	0	3	NULL	NULL	NULL	NULL	NULL	NULL	NULL	NULL	NULL	NULL	NULL	NULL	NULL	NULL	NULL	NULL	NULL	NULL	NULL	NULL	NULL
Anesthesia	Male	62	26.81	Lower GI	2021-10-19 13:05:38	2021-10-19 13:06:00	1	2021-10-19 13:03:00	3	2021-10-19 13:36:00	2021-10-19 13:39:38	3	2021-10-19 13:43:00	2021-10-19 13:48:00	34	5	0	0	0	0	0	1	1	0	0	1	0	3	NULL	NULL	NULL	NULL	NULL	NULL	NULL	NULL	NULL	NULL	NULL	NULL	NULL	NULL	NULL	NULL	NULL	NULL	NULL	NULL	NULL
Nursing	Female	53	31.32	Lower GI	2020-02-21 10:06:58	2020-02-21 10:18:00	12	2020-02-21 10:11:50	7	2020-02-21 10:48:00	2020-02-21 10:51:59	3	2020-02-21 10:54:00	2020-02-21 11:29:00	45	35	NULL	NULL	NULL	NULL	NULL	NULL	NULL	NULL	NULL	NULL	NULL	0	NULL	NULL	NULL	NULL	NULL	NULL	NULL	NULL	NULL	NULL	NULL	NULL	NULL	NULL	NULL	NULL	NULL	NULL	NULL	NULL	NULL
Nursing	Male	68	18.6	Upper GI	2020-02-13 16:08:09	2020-02-13 16:59:00	51	2020-02-13 16:46:33	13	2020-02-13 17:05:00	2020-02-13 17:08:05	3	2020-02-13 17:14:00	2020-02-13 17:44:00	60	30	0	0	1	1	0	1	0	0	0	0	0	3	NULL	NULL	NULL	NULL	NULL	NULL	NULL	NULL	NULL	NULL	NULL	NULL	NULL	NULL	NULL	NULL	NULL	NULL	NULL	NULL	NULL
Nursing	Female	24	27.92	Lower GI	2020-01-27 13:34:07	2020-01-27 14:01:00	27	2020-01-27 13:52:43	9	2020-01-27 14:21:00	2020-01-27 14:25:44	4	2020-01-27 14:30:00	2020-01-27 17:22:00	51	172	NULL	NULL	NULL	NULL	NULL	NULL	NULL	NULL	NULL	NULL	NULL	0	NULL	NULL	NULL	NULL	NULL	NULL	NULL	NULL	NULL	NULL	NULL	NULL	NULL	NULL	NULL	NULL	NULL	NULL	NULL	NULL	NULL
Nursing	Female	60	19.35	Lower GI	2020-02-21 14:52:13	2020-02-21 15:26:00	34	2020-02-21 15:19:15	7	2020-02-21 15:38:00	2020-02-21 15:42:26	4	2020-02-21 15:55:00	2020-02-21 16:44:00	50	49	0	0	0	0	0	0	0	0	0	0	1	1	NULL	NULL	NULL	NULL	NULL	NULL	NULL	NULL	NULL	NULL	NULL	NULL	NULL	NULL	NULL	NULL	NULL	NULL	NULL	NULL	NULL
Nursing	Male	64	23.57	Lower GI	2021-06-11 10:14:00	2021-06-11 10:56:00	42	2021-06-11 10:50:42	6	2021-06-11 11:16:00	2021-06-11 11:17:49	1	2021-06-11 11:23:00	2021-06-11 11:47:00	63	24	NULL	NULL	NULL	NULL	NULL	NULL	NULL	NULL	NULL	NULL	NULL	0	NULL	NULL	NULL	NULL	NULL	NULL	NULL	NULL	NULL	NULL	NULL	NULL	NULL	NULL	NULL	NULL	NULL	NULL	NULL	NULL	NULL
Nursing	Male	64	27.05	Lower GI	2021-05-03 07:59:21	2021-05-03 08:34:00	35	2021-05-03 08:26:02	8	2021-05-03 08:57:00	2021-05-03 09:00:13	3	2021-05-03 09:05:00	2021-05-03 09:35:00	61	30	NULL	NULL	NULL	NULL	NULL	NULL	NULL	NULL	NULL	NULL	NULL	0	NULL	NULL	NULL	NULL	NULL	NULL	NULL	NULL	NULL	NULL	NULL	NULL	NULL	NULL	NULL	NULL	NULL	NULL	NULL	NULL	NULL
Nursing	Female	42	29.7	Lower GI	2020-07-08 14:10:35	2020-07-08 14:25:00	15	2020-07-08 14:16:52	9	2020-07-08 14:32:00	2020-07-08 14:37:00	5	2020-07-08 14:45:00	2020-07-08 15:16:00	27	31	NULL	NULL	NULL	NULL	NULL	NULL	NULL	NULL	NULL	NULL	NULL	0	NULL	NULL	NULL	NULL	NULL	NULL	NULL	NULL	NULL	NULL	NULL	NULL	NULL	NULL	NULL	NULL	NULL	NULL	NULL	NULL	NULL
Anesthesia	Female	73	21.87	Lower GI	2021-08-04 10:04:13	2021-08-04 10:12:00	8	2021-08-04 10:02:00	10	2021-08-04 10:25:00	2021-08-04 10:29:48	4	2021-08-04 10:33:00	2021-08-04 11:20:00	25	47	0	1	0	0	0	0	1	0	0	1	0	3	NULL	NULL	NULL	NULL	NULL	NULL	NULL	NULL	NULL	NULL	NULL	NULL	NULL	NULL	NULL	NULL	NULL	NULL	NULL	NULL	NULL
Nursing	Female	62	29.86	Lower GI	2021-01-29 13:45:33	2021-01-29 14:16:00	31	2021-01-29 14:06:50	10	2021-01-29 14:28:00	2021-01-29 14:30:08	2	2021-01-29 14:36:00	2021-01-29 15:23:00	45	47	NULL	NULL	NULL	NULL	NULL	NULL	NULL	NULL	NULL	NULL	NULL	0	NULL	NULL	NULL	NULL	NULL	NULL	NULL	NULL	NULL	NULL	NULL	NULL	NULL	NULL	NULL	NULL	NULL	NULL	NULL	NULL	NULL
Nursing	Female	65	38.26	Upper GI	2020-06-26 13:26:00	2020-06-26 13:38:00	12	2020-06-26 13:32:00	6	2020-06-26 13:44:00	2020-06-26 13:51:04	7	2020-06-26 13:54:00	2020-06-26 14:08:00	25	14	0	0	0	0	0	1	1	1	0	1	0	4	NULL	NULL	NULL	NULL	NULL	NULL	NULL	NULL	NULL	NULL	NULL	NULL	NULL	NULL	NULL	NULL	NULL	NULL	NULL	NULL	NULL
Nursing	Female	61	25.4	Lower GI	2021-04-08 08:56:54	2021-04-08 09:13:00	17	2021-04-08 09:07:50	6	2021-04-08 09:54:00	2021-04-08 09:55:05	1	2021-04-08 10:06:00	2021-04-08 10:15:00	59	9	1	0	0	0	0	1	0	0	0	0	0	2	NULL	NULL	NULL	NULL	NULL	NULL	NULL	NULL	NULL	NULL	NULL	NULL	NULL	NULL	NULL	NULL	NULL	NULL	NULL	NULL	NULL
Nursing	Female	61	36.58	Lower GI	2021-06-07 07:00:00	2021-06-07 07:25:00	25	2021-06-07 07:07:00	18	2021-06-07 07:40:00	2021-06-07 07:42:34	2	2021-06-07 07:47:00	2021-06-07 08:11:00	42	24	0	0	0	0	0	1	0	0	0	0	0	1	NULL	NULL	NULL	NULL	NULL	NULL	NULL	NULL	NULL	NULL	NULL	NULL	NULL	NULL	NULL	NULL	NULL	NULL	NULL	NULL	NULL
Anesthesia	Female	66	30.62	Lower GI	2021-08-02 08:30:05	2021-08-02 08:31:00	1	2021-08-02 08:27:00	4	2021-08-02 08:49:00	2021-08-02 08:52:51	3	2021-08-02 08:57:00	2021-08-02 09:20:00	22	23	1	1	0	1	0	0	0	0	0	0	0	3	NULL	NULL	NULL	NULL	NULL	NULL	NULL	NULL	NULL	NULL	NULL	NULL	NULL	NULL	NULL	NULL	NULL	NULL	NULL	NULL	NULL
Anesthesia	Male	50	21.18	Lower GI	2021-10-25 11:35:28	2021-10-25 11:39:00	4	2021-10-25 11:33:00	6	2021-10-25 11:49:00	2021-10-25 11:51:13	2	2021-10-25 11:55:00	2021-10-25 12:34:00	16	39	NULL	NULL	NULL	NULL	NULL	NULL	NULL	NULL	NULL	NULL	NULL	0	NULL	NULL	NULL	NULL	NULL	NULL	NULL	NULL	NULL	NULL	NULL	NULL	NULL	NULL	NULL	NULL	NULL	NULL	NULL	NULL	NULL
Nursing	Female	38	32.61	DUAL	2020-02-03 14:54:49	2020-02-03 15:11:00	17	2020-02-03 15:01:41	10	2020-02-03 15:36:00	2020-02-03 15:39:31	3	2020-02-03 15:46:00	2020-02-03 16:00:00	45	14	0	0	0	1	0	0	0	0	0	0	0	1	NULL	NULL	NULL	NULL	NULL	NULL	NULL	NULL	NULL	NULL	NULL	NULL	NULL	NULL	NULL	NULL	NULL	NULL	NULL	NULL	NULL
Nursing	Female	47	26.63	Lower GI	2021-04-27 08:21:01	2021-04-27 09:12:00	51	2021-04-27 09:02:21	10	2021-04-27 09:38:00	2021-04-27 09:42:01	4	2021-04-27 09:46:00	2021-04-27 10:30:00	81	44	NULL	NULL	NULL	NULL	NULL	NULL	NULL	NULL	NULL	NULL	NULL	0	NULL	NULL	NULL	NULL	NULL	NULL	NULL	NULL	NULL	NULL	NULL	NULL	NULL	NULL	NULL	NULL	NULL	NULL	NULL	NULL	NULL
Nursing	Female	71	23.03	Lower GI	2020-03-11 14:40:59	2020-03-11 14:57:00	17	2020-03-11 14:50:48	7	2020-03-11 15:18:00	2020-03-11 15:23:32	5	2020-03-11 15:30:00	2020-03-11 17:00:00	43	90	NULL	NULL	NULL	NULL	NULL	NULL	NULL	NULL	NULL	NULL	NULL	0	NULL	NULL	NULL	NULL	NULL	NULL	NULL	NULL	NULL	NULL	NULL	NULL	NULL	NULL	NULL	NULL	NULL	NULL	NULL	NULL	NULL
Anesthesia	Female	77	25.7	Lower GI	2021-10-26 09:51:04	2021-10-26 10:12:00	21	2021-10-26 10:06:00	6	2021-10-26 10:59:00	2021-10-26 11:02:36	3	2021-10-26 11:06:00	2021-10-26 11:46:00	71	40	0	0	0	1	0	1	0	0	0	0	0	2	NULL	NULL	NULL	NULL	NULL	NULL	NULL	NULL	NULL	NULL	NULL	NULL	NULL	NULL	NULL	NULL	NULL	NULL	NULL	NULL	NULL
Nursing	Male	73	33.2	Lower GI	2020-06-30 08:16:44	2020-06-30 08:51:00	35	2020-06-30 08:40:16	11	2020-06-30 09:47:00	2020-06-30 09:55:41	8	2020-06-30 09:53:00	2020-06-30 10:50:00	99	57	1	0	0	1	0	1	1	0	0	1	0	5	NULL	NULL	NULL	NULL	NULL	NULL	NULL	NULL	NULL	NULL	NULL	NULL	NULL	NULL	NULL	NULL	NULL	NULL	NULL	NULL	NULL
Nursing	Female	55	29.63	Lower GI	2021-06-02 12:53:33	2021-06-02 13:34:00	41	2021-06-02 13:28:50	6	2021-06-02 13:50:00	2021-06-02 13:52:53	2	2021-06-02 13:58:00	2021-06-02 14:24:00	59	26	1	1	0	1	0	0	0	0	0	0	0	3	NULL	NULL	NULL	NULL	NULL	NULL	NULL	NULL	NULL	NULL	NULL	NULL	NULL	NULL	NULL	NULL	NULL	NULL	NULL	NULL	NULL
Nursing	Female	57	25.69	Upper GI	2021-04-14 15:36:57	2021-04-14 16:11:00	35	2021-04-14 16:03:10	8	2021-04-14 16:18:00	2021-04-14 16:23:30	5	2021-04-14 16:28:00	2021-04-14 17:13:00	47	45	0	0	0	0	0	0	0	1	0	0	0	1	NULL	NULL	NULL	NULL	NULL	NULL	NULL	NULL	NULL	NULL	NULL	NULL	NULL	NULL	NULL	NULL	NULL	NULL	NULL	NULL	NULL
Nursing	Female	68	32.19	Lower GI	2020-10-21 13:23:35	2020-10-21 13:32:00	9	2020-10-21 13:30:00	2	2020-10-21 13:56:00	2020-10-21 13:57:32	1	2020-10-21 14:07:00	2020-10-21 14:48:00	34	41	0	0	0	1	0	0	0	0	0	0	0	1	NULL	NULL	NULL	NULL	NULL	NULL	NULL	NULL	NULL	NULL	NULL	NULL	NULL	NULL	NULL	NULL	NULL	NULL	NULL	NULL	NULL
Nursing	Female	69	32.56	Upper GI	2021-02-24 17:33:10	2021-02-24 18:00:00	27	2021-02-24 17:48:31	12	2021-02-24 18:10:00	2021-02-24 18:16:20	6	2021-02-24 18:18:00	2021-02-24 18:32:00	43	14	0	0	0	1	0	0	0	0	0	0	0	1	NULL	NULL	NULL	NULL	NULL	NULL	NULL	NULL	NULL	NULL	NULL	NULL	NULL	NULL	NULL	NULL	NULL	NULL	NULL	NULL	NULL
Nursing	Female	51	24.21	Upper GI	2021-04-21 10:14:28	2021-04-21 10:31:00	17	2021-04-21 10:22:00	9	2021-04-21 10:37:00	2021-04-21 10:41:31	4	2021-04-21 10:45:00	2021-04-21 11:51:00	27	66	0	1	1	1	0	0	1	0	0	1	0	5	NULL	NULL	NULL	NULL	NULL	NULL	NULL	NULL	NULL	NULL	NULL	NULL	NULL	NULL	NULL	NULL	NULL	NULL	NULL	NULL	NULL
Anesthesia	Male	62	25.77	Lower GI	2021-09-20 10:50:00	2021-09-20 11:09:00	19	2021-09-20 10:55:00	14	2021-09-20 11:28:00	2021-09-20 11:29:25	1	2021-09-20 11:33:00	2021-09-20 11:50:00	39	17	NULL	NULL	NULL	NULL	NULL	NULL	NULL	NULL	NULL	NULL	NULL	0	NULL	NULL	NULL	NULL	NULL	NULL	NULL	NULL	NULL	NULL	NULL	NULL	NULL	NULL	NULL	NULL	NULL	NULL	NULL	NULL	NULL
Anesthesia	Female	56	30.79	Upper GI	2021-08-27 08:16:00	2021-08-27 08:24:00	8	2021-08-27 08:18:00	6	2021-08-27 08:43:00	2021-08-27 08:46:00	3	2021-08-27 08:55:00	2021-08-27 09:15:00	30	20	0	1	0	1	0	0	1	0	0	1	0	4	NULL	NULL	NULL	NULL	NULL	NULL	NULL	NULL	NULL	NULL	NULL	NULL	NULL	NULL	NULL	NULL	NULL	NULL	NULL	NULL	NULL
Nursing	Female	68	20.18	Lower GI	2020-09-29 07:32:21	2020-09-29 08:27:00	55	2020-09-29 08:24:08	3	2020-09-29 08:47:00	2020-09-29 08:50:18	3	2020-09-29 09:00:00	2020-09-29 09:45:00	78	45	0	1	0	1	0	0	0	1	0	0	0	3	NULL	NULL	NULL	NULL	NULL	NULL	NULL	NULL	NULL	NULL	NULL	NULL	NULL	NULL	NULL	NULL	NULL	NULL	NULL	NULL	NULL
Nursing	Female	69	20.34	Upper GI	2021-01-28 15:34:33	2021-01-28 15:47:00	13	2021-01-28 15:36:03	11	2021-01-28 15:55:00	2021-01-28 16:01:43	6	2021-01-28 16:07:00	2021-01-28 16:48:00	27	41	0	1	0	1	0	0	0	1	0	0	0	3	NULL	NULL	NULL	NULL	NULL	NULL	NULL	NULL	NULL	NULL	NULL	NULL	NULL	NULL	NULL	NULL	NULL	NULL	NULL	NULL	NULL
Nursing	Male	61	30.54	Lower GI	2021-03-05 11:20:34	2021-03-05 11:31:00	11	2021-03-05 11:23:00	8	2021-03-05 12:08:00	2021-03-05 12:15:57	7	2021-03-05 12:22:00	2021-03-05 12:57:00	55	35	0	0	0	0	0	1	0	0	0	0	0	1	NULL	NULL	NULL	NULL	NULL	NULL	NULL	NULL	NULL	NULL	NULL	NULL	NULL	NULL	NULL	NULL	NULL	NULL	NULL	NULL	NULL
Nursing	Female	61	22.31	Lower GI	2021-03-01 08:11:05	2021-03-01 08:28:00	17	2021-03-01 08:20:29	8	2021-03-01 08:36:00	2021-03-01 08:40:52	4	2021-03-01 08:44:00	2021-03-01 09:45:00	29	61	0	0	0	0	0	1	0	0	0	0	0	1	NULL	NULL	NULL	NULL	NULL	NULL	NULL	NULL	NULL	NULL	NULL	NULL	NULL	NULL	NULL	NULL	NULL	NULL	NULL	NULL	NULL
Nursing	Male	55	26.13	Lower GI	2021-03-16 09:33:27	2021-03-16 10:11:00	38	2021-03-16 10:03:09	8	2021-03-16 10:31:00	2021-03-16 10:35:38	4	2021-03-16 10:40:00	2021-03-16 11:05:00	62	25	0	0	0	0	0	1	0	0	0	0	0	1	NULL	NULL	NULL	NULL	NULL	NULL	NULL	NULL	NULL	NULL	NULL	NULL	NULL	NULL	NULL	NULL	NULL	NULL	NULL	NULL	NULL
Nursing	Female	68	23.83	Upper GI	2020-03-03 13:00:00	2020-03-03 13:22:00	22	2020-03-03 13:15:00	7	2020-03-03 13:29:00	2020-03-03 13:35:00	6	2020-03-03 13:44:00	2020-03-03 14:30:00	35	46	0	0	0	0	0	1	1	1	0	1	0	4	NULL	NULL	NULL	NULL	NULL	NULL	NULL	NULL	NULL	NULL	NULL	NULL	NULL	NULL	NULL	NULL	NULL	NULL	NULL	NULL	NULL
Nursing	Male	68	32.28	Lower GI	2020-11-03 06:58:24	2020-11-03 07:13:00	15	2020-11-03 07:08:39	5	2020-11-03 07:35:00	2020-11-03 07:39:38	4	2020-11-03 07:43:00	2020-11-03 08:15:00	41	32	0	0	0	1	0	0	0	0	0	0	0	1	NULL	NULL	NULL	NULL	NULL	NULL	NULL	NULL	NULL	NULL	NULL	NULL	NULL	NULL	NULL	NULL	NULL	NULL	NULL	NULL	NULL
Nursing	Female	39	32.95	Lower GI	2021-05-03 08:17:30	2021-05-03 08:35:00	18	2021-05-03 08:26:00	9	2021-05-03 08:53:00	2021-05-03 08:57:02	4	2021-05-03 09:03:00	2021-05-03 09:29:00	40	26	NULL	NULL	NULL	NULL	NULL	NULL	NULL	NULL	NULL	NULL	NULL	0	NULL	NULL	NULL	NULL	NULL	NULL	NULL	NULL	NULL	NULL	NULL	NULL	NULL	NULL	NULL	NULL	NULL	NULL	NULL	NULL	NULL
Nursing	Female	57	43.79	Lower GI	2020-02-06 16:40:05	2020-02-06 17:07:00	27	2020-02-06 17:00:49	7	2020-02-06 17:22:00	2020-02-06 17:23:31	1	2020-02-06 17:30:00	2020-02-06 17:40:00	43	10	1	1	0	1	0	1	0	0	0	0	0	4	NULL	NULL	NULL	NULL	NULL	NULL	NULL	NULL	NULL	NULL	NULL	NULL	NULL	NULL	NULL	NULL	NULL	NULL	NULL	NULL	NULL
Nursing	Male	76	24.41	Lower GI	2021-06-29 11:05:00	2021-06-29 11:28:00	23	2021-06-29 11:18:00	10	2021-06-29 12:00:00	2021-06-29 12:05:12	5	2021-06-29 12:09:00	2021-06-29 13:00:00	60	51	0	0	0	1	0	0	1	0	0	1	0	3	NULL	NULL	NULL	NULL	NULL	NULL	NULL	NULL	NULL	NULL	NULL	NULL	NULL	NULL	NULL	NULL	NULL	NULL	NULL	NULL	NULL
Nursing	Female	67	21.76	Lower GI	2021-01-05 09:28:52	2021-01-05 09:57:00	29	2021-01-05 09:51:00	6	2021-01-05 10:15:00	2021-01-05 10:19:39	4	2021-01-05 10:25:00	2021-01-05 10:50:00	51	25	NULL	NULL	NULL	NULL	NULL	NULL	NULL	NULL	NULL	NULL	NULL	0	NULL	NULL	NULL	NULL	NULL	NULL	NULL	NULL	NULL	NULL	NULL	NULL	NULL	NULL	NULL	NULL	NULL	NULL	NULL	NULL	NULL
Nursing	Female	66	42.16	Lower GI	2020-01-06 13:32:49	2020-01-06 13:46:00	14	2020-01-06 13:37:13	9	2020-01-06 14:07:00	2020-01-06 14:08:25	1	2020-01-06 14:15:00	2020-01-06 14:45:00	36	30	0	1	0	0	0	1	0	0	1	0	0	3	NULL	NULL	NULL	NULL	NULL	NULL	NULL	NULL	NULL	NULL	NULL	NULL	NULL	NULL	NULL	NULL	NULL	NULL	NULL	NULL	NULL
Anesthesia	Female	56	27.46	Lower GI	2021-08-09 13:21:39	2021-08-09 14:16:00	55	2021-08-09 14:12:00	4	2021-08-09 14:28:00	2021-08-09 14:30:34	2	2021-08-09 14:37:00	2021-08-09 15:08:00	69	31	0	0	0	0	0	1	0	0	0	0	0	1	NULL	NULL	NULL	NULL	NULL	NULL	NULL	NULL	NULL	NULL	NULL	NULL	NULL	NULL	NULL	NULL	NULL	NULL	NULL	NULL	NULL
Nursing	Male	58	25.68	DUAL	2020-01-17 14:02:42	2020-01-17 14:27:00	25	2020-01-17 14:21:07	6	2020-01-17 15:10:00	2020-01-17 15:15:12	5	2020-01-17 15:19:00	2020-01-17 16:00:00	73	41	0	1	0	1	0	1	0	0	0	0	0	3	NULL	NULL	NULL	NULL	NULL	NULL	NULL	NULL	NULL	NULL	NULL	NULL	NULL	NULL	NULL	NULL	NULL	NULL	NULL	NULL	NULL
Nursing	Male	64	32.08	Upper GI	2021-03-26 11:46:30	2021-03-26 12:01:00	15	2021-03-26 11:53:35	8	2021-03-26 12:10:00	2021-03-26 12:13:00	3	2021-03-26 12:21:00	2021-03-26 13:10:00	27	49	1	0	0	1	0	0	0	0	0	0	0	2	NULL	NULL	NULL	NULL	NULL	NULL	NULL	NULL	NULL	NULL	NULL	NULL	NULL	NULL	NULL	NULL	NULL	NULL	NULL	NULL	NULL
Nursing	Male	49	28.48	Lower GI	2020-07-13 10:26:14	2020-07-13 10:38:00	12	2020-07-13 10:29:00	9	2020-07-13 10:59:00	2020-07-13 11:02:09	3	2020-07-13 11:03:00	2020-07-13 11:45:00	36	42	1	0	0	1	0	1	0	1	0	0	0	4	NULL	NULL	NULL	NULL	NULL	NULL	NULL	NULL	NULL	NULL	NULL	NULL	NULL	NULL	NULL	NULL	NULL	NULL	NULL	NULL	NULL
Nursing	Female	70	19.85	Lower GI	2020-10-29 08:20:03	2020-10-29 08:55:00	35	2020-10-29 08:47:54	8	2020-10-29 09:24:00	2020-10-29 09:31:00	7	2020-10-29 09:30:00	2020-10-29 10:00:00	71	30	NULL	NULL	NULL	NULL	NULL	NULL	NULL	NULL	NULL	NULL	NULL	0	NULL	NULL	NULL	NULL	NULL	NULL	NULL	NULL	NULL	NULL	NULL	NULL	NULL	NULL	NULL	NULL	NULL	NULL	NULL	NULL	NULL
Nursing	Female	63	34.18	Lower GI	2020-02-20 07:33:48	2020-02-20 07:59:00	26	2020-02-20 07:51:28	8	2020-02-20 08:12:00	2020-02-20 08:17:06	5	2020-02-20 08:20:00	2020-02-20 08:45:00	44	25	NULL	NULL	NULL	NULL	NULL	NULL	NULL	NULL	NULL	NULL	NULL	0	NULL	NULL	NULL	NULL	NULL	NULL	NULL	NULL	NULL	NULL	NULL	NULL	NULL	NULL	NULL	NULL	NULL	NULL	NULL	NULL	NULL
Nursing	Male	76	23.15	Lower GI	2021-02-24 12:51:06	2021-02-24 13:08:00	17	2021-02-24 13:02:00	6	2021-02-24 13:38:00	2021-02-24 13:39:47	1	2021-02-24 13:50:00	2021-02-24 14:23:00	48	33	1	0	1	0	0	1	0	0	0	0	0	3	NULL	NULL	NULL	NULL	NULL	NULL	NULL	NULL	NULL	NULL	NULL	NULL	NULL	NULL	NULL	NULL	NULL	NULL	NULL	NULL	NULL
Nursing	Female	73	33.2	Upper GI	2020-05-29 14:01:49	2020-05-29 15:00:00	59	2020-05-29 14:50:00	10	2020-05-29 15:17:00	2020-05-29 15:20:45	3	2020-05-29 15:26:00	2020-05-29 16:09:00	79	43	0	0	0	0	0	1	0	0	0	0	0	1	NULL	NULL	NULL	NULL	NULL	NULL	NULL	NULL	NULL	NULL	NULL	NULL	NULL	NULL	NULL	NULL	NULL	NULL	NULL	NULL	NULL
Nursing	Male	62	38.22	Lower GI	2021-01-13 13:36:26	2021-01-13 13:56:00	20	2021-01-13 13:46:57	10	2021-01-13 14:47:00	2021-01-13 14:55:02	8	2021-01-13 15:00:00	2021-01-13 15:14:00	79	14	1	0	0	0	0	1	1	0	0	1	0	4	NULL	NULL	NULL	NULL	NULL	NULL	NULL	NULL	NULL	NULL	NULL	NULL	NULL	NULL	NULL	NULL	NULL	NULL	NULL	NULL	NULL
Anesthesia	Female	56	35.9	Upper GI	2021-08-23 09:18:41	2021-08-23 09:33:00	15	2021-08-23 09:25:00	8	2021-08-23 09:40:00	2021-08-23 09:45:14	5	2021-08-23 09:48:00	2021-08-23 10:15:00	27	27	0	1	0	1	0	1	0	0	0	0	0	3	NULL	NULL	NULL	NULL	NULL	NULL	NULL	NULL	NULL	NULL	NULL	NULL	NULL	NULL	NULL	NULL	NULL	NULL	NULL	NULL	NULL
Nursing	Female	58	29.7	Lower GI	2020-02-28 09:15:33	2020-02-28 09:38:00	23	2020-02-28 09:34:37	4	2020-02-28 09:57:00	2020-02-28 10:00:19	3	2020-02-28 10:00:00	2020-02-28 11:30:00	45	90	1	0	0	0	0	1	1	0	0	1	0	4	NULL	NULL	NULL	NULL	NULL	NULL	NULL	NULL	NULL	NULL	NULL	NULL	NULL	NULL	NULL	NULL	NULL	NULL	NULL	NULL	NULL
Nursing	Female	40	23.4	Lower GI	2020-10-16 11:09:01	2020-10-16 11:31:00	22	2020-10-16 11:16:00	15	2020-10-16 11:50:00	2020-10-16 12:01:21	11	2020-10-16 12:05:00	2020-10-16 13:10:00	52	65	NULL	NULL	NULL	NULL	NULL	NULL	NULL	NULL	NULL	NULL	NULL	0	NULL	NULL	NULL	NULL	NULL	NULL	NULL	NULL	NULL	NULL	NULL	NULL	NULL	NULL	NULL	NULL	NULL	NULL	NULL	NULL	NULL
Nursing	Female	65	22.98	Lower GI	2020-08-04 12:37:35	2020-08-04 13:13:00	36	2020-08-04 12:56:15	17	2020-08-04 13:34:00	2020-08-04 13:37:44	3	2020-08-04 13:45:00	2020-08-04 14:25:00	60	40	0	0	0	0	0	0	1	0	0	1	0	2	NULL	NULL	NULL	NULL	NULL	NULL	NULL	NULL	NULL	NULL	NULL	NULL	NULL	NULL	NULL	NULL	NULL	NULL	NULL	NULL	NULL
Nursing	Female	51	34.49	Lower GI	2020-11-18 13:05:48	2020-11-18 13:38:00	33	2020-11-18 13:32:36	6	2020-11-18 13:52:00	2020-11-18 14:00:41	8	2020-11-18 14:00:00	2020-11-18 14:45:00	55	45	0	0	0	1	0	0	1	0	0	1	0	3	NULL	NULL	NULL	NULL	NULL	NULL	NULL	NULL	NULL	NULL	NULL	NULL	NULL	NULL	NULL	NULL	NULL	NULL	NULL	NULL	NULL
Anesthesia	Male	71	24.85	Lower GI	2021-09-30 09:08:56	2021-09-30 09:19:00	11	2021-09-30 09:06:00	13	2021-09-30 09:57:00	2021-09-30 10:03:30	6	2021-09-30 10:00:00	2021-09-30 10:46:00	55	46	NULL	NULL	NULL	NULL	NULL	NULL	NULL	NULL	NULL	NULL	NULL	0	NULL	NULL	NULL	NULL	NULL	NULL	NULL	NULL	NULL	NULL	NULL	NULL	NULL	NULL	NULL	NULL	NULL	NULL	NULL	NULL	NULL
Nursing	Female	74	30.9	Upper GI	2021-01-19 11:40:08	2021-01-19 12:01:00	21	2021-01-19 11:50:00	11	2021-01-19 12:05:00	2021-01-19 12:06:28	1	2021-01-19 12:15:00	2021-01-19 13:08:00	26	53	0	0	0	0	0	1	1	1	1	1	1	6	NULL	NULL	NULL	NULL	NULL	NULL	NULL	NULL	NULL	NULL	NULL	NULL	NULL	NULL	NULL	NULL	NULL	NULL	NULL	NULL	NULL
Nursing	Male	55	25.85	Lower GI	2020-06-16 09:55:06	2020-06-16 10:22:00	27	2020-06-16 10:15:15	7	2020-06-16 10:50:00	2020-06-16 10:51:20	1	2020-06-16 10:54:00	2020-06-16 11:42:00	56	48	0	0	0	1	0	1	1	1	0	1	0	5	NULL	NULL	NULL	NULL	NULL	NULL	NULL	NULL	NULL	NULL	NULL	NULL	NULL	NULL	NULL	NULL	NULL	NULL	NULL	NULL	NULL
Nursing	Male	68	25.11	Lower GI	2020-09-09 08:33:47	2020-09-09 08:47:00	14	2020-09-09 08:39:00	8	2020-09-09 09:01:00	2020-09-09 09:03:47	2	2020-09-09 09:09:00	2020-09-09 10:55:00	30	106	0	0	0	0	0	0	1	0	0	1	0	2	NULL	NULL	NULL	NULL	NULL	NULL	NULL	NULL	NULL	NULL	NULL	NULL	NULL	NULL	NULL	NULL	NULL	NULL	NULL	NULL	NULL
Nursing	Male	76	26.63	Lower GI	2020-09-08 07:38:00	2020-09-08 08:07:00	29	2020-09-08 07:59:00	8	2020-09-08 08:37:00	2020-09-08 08:40:41	3	2020-09-08 08:45:00	2020-09-08 09:12:00	62	27	0	1	0	1	0	1	0	0	0	0	0	3	NULL	NULL	NULL	NULL	NULL	NULL	NULL	NULL	NULL	NULL	NULL	NULL	NULL	NULL	NULL	NULL	NULL	NULL	NULL	NULL	NULL
Nursing	Female	59	21.9	Lower GI	2020-03-17 09:04:07	2020-03-17 09:28:00	24	2020-03-17 09:20:00	8	2020-03-17 10:06:00	2020-03-17 10:10:28	4	2020-03-17 10:21:00	2020-03-17 10:44:00	66	23	0	1	0	0	0	1	0	1	0	0	0	3	NULL	NULL	NULL	NULL	NULL	NULL	NULL	NULL	NULL	NULL	NULL	NULL	NULL	NULL	NULL	NULL	NULL	NULL	NULL	NULL	NULL
Anesthesia	Male	65	35.12	Lower GI	2021-09-14 13:55:59	2021-09-14 14:13:00	18	2021-09-14 14:08:00	5	2021-09-14 14:39:00	2021-09-14 14:42:11	3	2021-09-14 14:48:00	2021-09-14 15:10:00	47	22	0	0	0	0	0	1	1	0	0	1	1	4	NULL	NULL	NULL	NULL	NULL	NULL	NULL	NULL	NULL	NULL	NULL	NULL	NULL	NULL	NULL	NULL	NULL	NULL	NULL	NULL	NULL
Nursing	Male	63	24.9	Lower GI	2021-04-01 09:30:19	2021-04-01 10:04:00	34	2021-04-01 09:57:00	7	2021-04-01 10:35:00	2021-04-01 10:37:41	2	2021-04-01 10:43:00	2021-04-01 11:00:00	67	17	0	0	0	0	0	1	0	0	0	0	0	1	NULL	NULL	NULL	NULL	NULL	NULL	NULL	NULL	NULL	NULL	NULL	NULL	NULL	NULL	NULL	NULL	NULL	NULL	NULL	NULL	NULL
Nursing	Female	52	42.56	Lower GI	2021-01-22 08:21:26	2021-01-22 09:10:00	49	2021-01-22 08:59:00	11	2021-01-22 09:31:00	2021-01-22 09:32:48	1	2021-01-22 09:39:00	2021-01-22 10:16:00	71	37	0	0	0	0	0	1	0	0	0	0	0	1	NULL	NULL	NULL	NULL	NULL	NULL	NULL	NULL	NULL	NULL	NULL	NULL	NULL	NULL	NULL	NULL	NULL	NULL	NULL	NULL	NULL
Nursing	Female	79	23.96	Lower GI	2020-02-05 10:53:02	2020-02-05 11:31:00	38	2020-02-05 11:15:11	16	2020-02-05 11:52:00	2020-02-05 11:56:07	4	2020-02-05 12:00:00	2020-02-05 12:40:00	63	40	0	0	0	0	0	1	0	0	0	0	0	1	NULL	NULL	NULL	NULL	NULL	NULL	NULL	NULL	NULL	NULL	NULL	NULL	NULL	NULL	NULL	NULL	NULL	NULL	NULL	NULL	NULL
Nursing	Female	51	29.76	Lower GI	2021-02-23 07:08:47	2021-02-23 07:55:00	47	2021-02-23 07:51:14	4	2021-02-23 08:14:00	2021-02-23 08:16:01	2	2021-02-23 08:21:00	2021-02-23 08:55:00	68	34	0	0	0	0	0	1	1	0	0	1	0	3	NULL	NULL	NULL	NULL	NULL	NULL	NULL	NULL	NULL	NULL	NULL	NULL	NULL	NULL	NULL	NULL	NULL	NULL	NULL	NULL	NULL
Nursing	Male	66	25.47	Lower GI	2020-10-22 15:26:00	2020-10-22 15:36:00	10	2020-10-22 15:29:00	7	2020-10-22 15:47:00	2020-10-22 15:52:17	5	2020-10-22 15:58:00	2020-10-22 16:55:00	26	57	0	0	0	0	0	0	0	1	0	0	0	1	NULL	NULL	NULL	NULL	NULL	NULL	NULL	NULL	NULL	NULL	NULL	NULL	NULL	NULL	NULL	NULL	NULL	NULL	NULL	NULL	NULL
Nursing	Male	88	26.58	Lower GI	2021-01-14 08:18:46	2021-01-14 08:35:00	17	2021-01-14 08:26:40	9	2021-01-14 09:03:00	2021-01-14 09:08:15	5	2021-01-14 09:14:00	2021-01-14 09:30:00	50	16	0	0	0	1	0	0	0	0	0	0	0	1	NULL	NULL	NULL	NULL	NULL	NULL	NULL	NULL	NULL	NULL	NULL	NULL	NULL	NULL	NULL	NULL	NULL	NULL	NULL	NULL	NULL
Nursing	Male	51	30.95	Lower GI	2021-04-28 09:37:46	2021-04-28 09:57:00	20	2021-04-28 09:47:07	10	2021-04-28 10:12:00	2021-04-28 10:16:55	4	2021-04-28 10:21:00	2021-04-28 10:59:00	39	38	0	0	0	0	0	1	0	0	0	0	1	2	NULL	NULL	NULL	NULL	NULL	NULL	NULL	NULL	NULL	NULL	NULL	NULL	NULL	NULL	NULL	NULL	NULL	NULL	NULL	NULL	NULL
Anesthesia	Male	77	22.47	Upper GI	2021-09-16 11:26:13	2021-09-16 11:31:00	5	2021-09-16 11:26:00	5	2021-09-16 11:45:00	2021-09-16 11:48:38	3	2021-09-16 11:50:00	2021-09-16 12:10:00	22	20	NULL	NULL	NULL	NULL	NULL	NULL	NULL	NULL	NULL	NULL	NULL	0	NULL	NULL	NULL	NULL	NULL	NULL	NULL	NULL	NULL	NULL	NULL	NULL	NULL	NULL	NULL	NULL	NULL	NULL	NULL	NULL	NULL
Anesthesia	Male	45	30.85	Lower GI	2021-09-22 13:28:06	2021-09-22 14:00:00	32	2021-09-22 13:51:00	9	2021-09-22 14:24:00	2021-09-22 14:26:09	2	2021-09-22 14:35:00	2021-09-22 15:03:00	58	28	0	0	0	1	0	0	0	0	0	0	0	1	NULL	NULL	NULL	NULL	NULL	NULL	NULL	NULL	NULL	NULL	NULL	NULL	NULL	NULL	NULL	NULL	NULL	NULL	NULL	NULL	NULL
Nursing	Female	53	25.61	DUAL	2020-06-18 07:02:12	2020-06-18 07:26:00	24	2020-06-18 07:11:55	15	2020-06-18 07:47:00	2020-06-18 07:50:07	3	2020-06-18 07:54:00	2020-06-18 08:57:00	48	63	0	1	0	0	0	1	1	1	0	1	0	5	NULL	NULL	NULL	NULL	NULL	NULL	NULL	NULL	NULL	NULL	NULL	NULL	NULL	NULL	NULL	NULL	NULL	NULL	NULL	NULL	NULL
Nursing	Male	73	23.08	Lower GI	2020-05-19 08:51:15	2020-05-19 09:04:00	13	2020-05-19 08:56:21	8	2020-05-19 09:22:00	2020-05-19 09:27:20	5	2020-05-19 09:31:00	2020-05-19 10:16:00	36	45	0	0	0	1	0	0	1	0	0	1	0	3	NULL	NULL	NULL	NULL	NULL	NULL	NULL	NULL	NULL	NULL	NULL	NULL	NULL	NULL	NULL	NULL	NULL	NULL	NULL	NULL	NULL
Nursing	Male	67	27.71	Lower GI	2020-01-23 11:21:47	2020-01-23 11:46:00	25	2020-01-23 11:40:06	6	2020-01-23 12:11:00	2020-01-23 12:13:08	2	2020-01-23 12:15:00	2020-01-23 12:40:00	52	25	NULL	NULL	NULL	NULL	NULL	NULL	NULL	NULL	NULL	NULL	NULL	0	NULL	NULL	NULL	NULL	NULL	NULL	NULL	NULL	NULL	NULL	NULL	NULL	NULL	NULL	NULL	NULL	NULL	NULL	NULL	NULL	NULL
Nursing	Female	67	27.4	Lower GI	2021-04-26 14:45:00	2021-04-26 15:06:00	21	2021-04-26 14:48:00	18	2021-04-26 15:17:00	2021-04-26 15:21:06	4	2021-04-26 15:26:00	2021-04-26 15:49:00	36	23	1	0	0	1	0	1	0	0	0	0	1	4	NULL	NULL	NULL	NULL	NULL	NULL	NULL	NULL	NULL	NULL	NULL	NULL	NULL	NULL	NULL	NULL	NULL	NULL	NULL	NULL	NULL
Anesthesia	Female	47	28.41	Lower GI	2021-08-09 09:53:27	2021-08-09 11:21:00	88	2021-08-09 11:15:00	6	2021-08-09 11:43:00	2021-08-09 11:47:23	4	2021-08-09 11:53:00	2021-08-09 12:11:00	114	18	NULL	NULL	NULL	NULL	NULL	NULL	NULL	NULL	NULL	NULL	NULL	0	NULL	NULL	NULL	NULL	NULL	NULL	NULL	NULL	NULL	NULL	NULL	NULL	NULL	NULL	NULL	NULL	NULL	NULL	NULL	NULL	NULL
Nursing	Male	74	30.08	Lower GI	2020-10-08 15:03:11	2020-10-08 15:17:00	14	2020-10-08 15:11:18	6	2020-10-08 15:39:00	2020-10-08 15:43:19	4	2020-10-08 15:51:00	2020-10-08 16:30:00	40	39	1	0	0	0	0	1	1	0	0	1	0	4	NULL	NULL	NULL	NULL	NULL	NULL	NULL	NULL	NULL	NULL	NULL	NULL	NULL	NULL	NULL	NULL	NULL	NULL	NULL	NULL	NULL
Nursing	Male	70	20.54	Lower GI	2020-08-27 15:13:23	2020-08-27 15:33:00	20	2020-08-27 15:26:57	7	2020-08-27 15:48:00	2020-08-27 15:54:52	6	2020-08-27 16:02:00	2020-08-27 16:19:00	41	17	1	0	0	1	0	0	0	1	0	0	0	3	NULL	NULL	NULL	NULL	NULL	NULL	NULL	NULL	NULL	NULL	NULL	NULL	NULL	NULL	NULL	NULL	NULL	NULL	NULL	NULL	NULL
Nursing	Female	35	36.67	Upper GI	2021-02-09 07:00:45	2021-02-09 07:18:00	18	2021-02-09 07:06:00	12	2021-02-09 07:20:00	2021-02-09 07:24:07	4	2021-02-09 07:31:00	2021-02-09 08:11:00	24	40	0	0	0	0	0	0	0	0	0	0	0	0	NULL	NULL	NULL	NULL	NULL	NULL	NULL	NULL	NULL	NULL	NULL	NULL	NULL	NULL	NULL	NULL	NULL	NULL	NULL	NULL	NULL
Anesthesia	Female	62	26.61	Lower GI	2021-08-03 12:57:07	2021-08-03 13:17:00	20	2021-08-03 13:12:00	5	2021-08-03 13:38:00	2021-08-03 13:40:44	2	2021-08-03 13:46:00	2021-08-03 14:49:00	43	63	0	0	0	0	0	1	0	0	0	0	0	1	NULL	NULL	NULL	NULL	NULL	NULL	NULL	NULL	NULL	NULL	NULL	NULL	NULL	NULL	NULL	NULL	NULL	NULL	NULL	NULL	NULL
Anesthesia	Male	72	25.06	Lower GI	2021-10-25 10:59:03	2021-10-25 11:11:00	12	2021-10-25 10:58:00	13	2021-10-25 11:27:00	2021-10-25 11:30:40	3	2021-10-25 11:30:00	2021-10-25 12:33:00	31	63	1	1	0	1	0	1	0	0	0	0	0	4	NULL	NULL	NULL	NULL	NULL	NULL	NULL	NULL	NULL	NULL	NULL	NULL	NULL	NULL	NULL	NULL	NULL	NULL	NULL	NULL	NULL
Nursing	Female	55	22.27	Lower GI	2021-04-08 09:14:01	2021-04-08 10:10:00	56	2021-04-08 10:02:42	8	2021-04-08 10:22:00	2021-04-08 10:24:38	2	2021-04-08 10:29:00	2021-04-08 11:38:00	70	69	NULL	NULL	NULL	NULL	NULL	NULL	NULL	NULL	NULL	NULL	NULL	0	NULL	NULL	NULL	NULL	NULL	NULL	NULL	NULL	NULL	NULL	NULL	NULL	NULL	NULL	NULL	NULL	NULL	NULL	NULL	NULL	NULL
Nursing	Female	54	19.85	Lower GI	2020-11-04 12:41:53	2020-11-04 17:15:00	274	2020-11-04 13:09:00	246	2020-11-04 13:39:00	2020-11-04 13:41:38	2	2020-11-04 13:47:00	2020-11-04 14:25:00	60	38	NULL	NULL	NULL	NULL	NULL	NULL	NULL	NULL	NULL	NULL	NULL	0	NULL	NULL	NULL	NULL	NULL	NULL	NULL	NULL	NULL	NULL	NULL	NULL	NULL	NULL	NULL	NULL	NULL	NULL	NULL	NULL	NULL
Nursing	Male	56	30.27	Lower GI	2021-05-19 11:20:26	2021-05-19 11:39:00	19	2021-05-19 11:29:34	10	2021-05-19 12:18:00	2021-05-19 12:28:17	10	2021-05-19 12:30:00	2021-05-19 13:00:00	68	30	0	0	0	1	0	1	0	1	0	0	0	3	NULL	NULL	NULL	NULL	NULL	NULL	NULL	NULL	NULL	NULL	NULL	NULL	NULL	NULL	NULL	NULL	NULL	NULL	NULL	NULL	NULL
Nursing	Male	54	22.81	Lower GI	2021-02-08 11:59:27	2021-02-08 12:40:00	41	2021-02-08 12:27:04	13	2021-02-08 12:54:00	2021-02-08 12:58:46	4	2021-02-08 13:03:00	2021-02-08 13:31:00	59	28	0	1	0	1	0	1	0	0	0	0	0	3	NULL	NULL	NULL	NULL	NULL	NULL	NULL	NULL	NULL	NULL	NULL	NULL	NULL	NULL	NULL	NULL	NULL	NULL	NULL	NULL	NULL
Nursing	Male	65	38.01	Lower GI	2021-04-14 13:43:08	2021-04-14 13:53:00	10	2021-04-14 13:45:45	8	2021-04-14 14:40:00	2021-04-14 14:45:26	5	2021-04-14 14:50:00	2021-04-14 15:29:00	62	39	NULL	NULL	NULL	NULL	NULL	NULL	NULL	NULL	NULL	NULL	NULL	0	NULL	NULL	NULL	NULL	NULL	NULL	NULL	NULL	NULL	NULL	NULL	NULL	NULL	NULL	NULL	NULL	NULL	NULL	NULL	NULL	NULL
Nursing	Male	53	26.5	DUAL	2020-09-01 15:14:29	2020-09-01 16:52:00	98	2020-09-01 16:41:13	11	2020-09-01 17:18:00	2020-09-01 17:21:08	3	2020-09-01 17:26:00	2020-09-01 18:30:00	127	64	0	1	0	1	0	0	0	0	0	0	0	2	NULL	NULL	NULL	NULL	NULL	NULL	NULL	NULL	NULL	NULL	NULL	NULL	NULL	NULL	NULL	NULL	NULL	NULL	NULL	NULL	NULL
Nursing	Male	71	23.73	Lower GI	2021-02-02 13:02:00	2021-02-02 13:18:00	16	2021-02-02 13:11:00	7	2021-02-02 13:49:00	2021-02-02 13:55:16	6	2021-02-02 14:00:00	2021-02-02 15:49:00	53	109	0	0	0	0	0	1	1	1	0	1	0	4	NULL	NULL	NULL	NULL	NULL	NULL	NULL	NULL	NULL	NULL	NULL	NULL	NULL	NULL	NULL	NULL	NULL	NULL	NULL	NULL	NULL
Nursing	Male	71	29.86	Lower GI	2020-12-29 08:52:41	2020-12-29 09:03:00	11	2020-12-29 08:57:30	6	2020-12-29 09:19:00	2020-12-29 09:22:23	3	2020-12-29 09:24:00	2020-12-29 10:00:00	30	36	0	0	0	0	0	1	1	0	0	1	0	3	NULL	NULL	NULL	NULL	NULL	NULL	NULL	NULL	NULL	NULL	NULL	NULL	NULL	NULL	NULL	NULL	NULL	NULL	NULL	NULL	NULL
Anesthesia	Female	48	41.6	Lower GI	2021-10-21 09:43:04	2021-10-21 09:56:00	13	2021-10-21 09:43:00	13	2021-10-21 10:19:00	2021-10-21 10:23:12	4	2021-10-21 10:24:00	2021-10-21 10:50:00	40	26	0	1	0	0	0	0	0	0	0	0	0	1	NULL	NULL	NULL	NULL	NULL	NULL	NULL	NULL	NULL	NULL	NULL	NULL	NULL	NULL	NULL	NULL	NULL	NULL	NULL	NULL	NULL
Nursing	Female	51	24.92	Lower GI	2020-08-26 13:31:49	2020-08-26 14:06:00	35	2020-08-26 13:53:38	13	2020-08-26 14:21:00	2020-08-26 14:24:22	3	2020-08-26 14:28:00	2020-08-26 14:51:00	53	23	NULL	NULL	NULL	NULL	NULL	NULL	NULL	NULL	NULL	NULL	NULL	0	NULL	NULL	NULL	NULL	NULL	NULL	NULL	NULL	NULL	NULL	NULL	NULL	NULL	NULL	NULL	NULL	NULL	NULL	NULL	NULL	NULL
Anesthesia	Male	53	33.5	Lower GI	2021-10-11 09:23:19	2021-10-11 09:26:00	3	2021-10-11 09:23:00	3	2021-10-11 09:53:00	2021-10-11 09:56:00	3	2021-10-11 10:00:00	2021-10-11 10:24:00	33	24	0	0	0	0	0	0	0	0	0	0	0	0	NULL	NULL	NULL	NULL	NULL	NULL	NULL	NULL	NULL	NULL	NULL	NULL	NULL	NULL	NULL	NULL	NULL	NULL	NULL	NULL	NULL
Nursing	Female	66	24.3	Lower GI	2021-02-05 09:39:06	2021-02-05 10:00:00	21	2021-02-05 09:53:00	7	2021-02-05 10:40:00	2021-02-05 10:43:06	3	2021-02-05 10:54:00	2021-02-05 11:35:00	64	41	0	0	0	0	0	0	0	0	0	0	0	0	NULL	NULL	NULL	NULL	NULL	NULL	NULL	NULL	NULL	NULL	NULL	NULL	NULL	NULL	NULL	NULL	NULL	NULL	NULL	NULL	NULL
Nursing	Female	66	24.79	Lower GI	2021-04-21 06:29:58	2021-04-21 07:15:00	46	2021-04-21 07:10:29	5	2021-04-21 07:39:00	2021-04-21 07:41:48	2	2021-04-21 07:46:00	2021-04-21 08:22:00	72	36	0	0	0	0	0	0	0	0	0	0	0	0	NULL	NULL	NULL	NULL	NULL	NULL	NULL	NULL	NULL	NULL	NULL	NULL	NULL	NULL	NULL	NULL	NULL	NULL	NULL	NULL	NULL
Nursing	Female	67	21.26	Lower GI	2021-02-18 07:16:57	2021-02-18 07:45:00	29	2021-02-18 07:37:00	8	2021-02-18 08:03:00	2021-02-18 08:05:30	2	2021-02-18 08:10:00	2021-02-18 09:04:00	49	54	0	0	0	1	0	1	0	0	0	0	0	2	NULL	NULL	NULL	NULL	NULL	NULL	NULL	NULL	NULL	NULL	NULL	NULL	NULL	NULL	NULL	NULL	NULL	NULL	NULL	NULL	NULL
Nursing	Female	60	17.18	Lower GI	2021-03-08 07:48:00	2021-03-08 08:10:00	22	2021-03-08 08:02:00	8	2021-03-08 08:35:00	2021-03-08 08:40:00	5	2021-03-08 08:43:00	2021-03-08 09:12:00	52	29	NULL	NULL	NULL	NULL	NULL	NULL	NULL	NULL	NULL	NULL	NULL	0	NULL	NULL	NULL	NULL	NULL	NULL	NULL	NULL	NULL	NULL	NULL	NULL	NULL	NULL	NULL	NULL	NULL	NULL	NULL	NULL	NULL
Nursing	Female	61	19.97	Lower GI	2020-07-28 07:17:13	2020-07-28 07:25:00	8	2020-07-28 07:18:00	7	2020-07-28 08:07:00	2020-07-28 08:08:28	1	2020-07-28 08:15:00	2020-07-28 08:59:00	51	44	NULL	NULL	NULL	NULL	NULL	NULL	NULL	NULL	NULL	NULL	NULL	0	NULL	NULL	NULL	NULL	NULL	NULL	NULL	NULL	NULL	NULL	NULL	NULL	NULL	NULL	NULL	NULL	NULL	NULL	NULL	NULL	NULL
Nursing	Female	60	29.62	Lower GI	2021-06-18 11:06:50	2021-06-18 12:06:00	60	2021-06-18 11:57:00	9	2021-06-18 12:32:00	2021-06-18 12:34:29	2	2021-06-18 12:38:00	2021-06-18 13:13:00	88	35	NULL	NULL	NULL	NULL	NULL	NULL	NULL	NULL	NULL	NULL	NULL	0	NULL	NULL	NULL	NULL	NULL	NULL	NULL	NULL	NULL	NULL	NULL	NULL	NULL	NULL	NULL	NULL	NULL	NULL	NULL	NULL	NULL
Nursing	Female	35	19.31	Upper GI	2021-01-21 09:54:15	2021-01-21 10:10:00	16	2021-01-21 09:59:00	11	2021-01-21 10:16:00	2021-01-21 10:17:22	1	2021-01-21 10:22:00	2021-01-21 11:11:00	23	49	0	0	0	0	0	0	1	0	0	1	0	2	NULL	NULL	NULL	NULL	NULL	NULL	NULL	NULL	NULL	NULL	NULL	NULL	NULL	NULL	NULL	NULL	NULL	NULL	NULL	NULL	NULL
Nursing	Male	35	40.89	Lower GI	2021-04-28 11:39:56	2021-04-28 11:52:00	13	2021-04-28 11:46:57	6	2021-04-28 12:09:00	2021-04-28 12:14:45	5	2021-04-28 12:18:00	2021-04-28 13:10:00	35	52	NULL	NULL	NULL	NULL	NULL	NULL	NULL	NULL	NULL	NULL	NULL	0	NULL	NULL	NULL	NULL	NULL	NULL	NULL	NULL	NULL	NULL	NULL	NULL	NULL	NULL	NULL	NULL	NULL	NULL	NULL	NULL	NULL
Nursing	Female	72	25.4	Lower GI	2020-09-17 10:31:30	2020-09-17 11:02:00	31	2020-09-17 10:53:06	9	2020-09-17 11:11:00	2020-09-17 11:15:42	4	2020-09-17 11:22:00	2020-09-17 12:12:00	44	50	0	0	0	0	0	0	1	0	1	1	0	3	NULL	NULL	NULL	NULL	NULL	NULL	NULL	NULL	NULL	NULL	NULL	NULL	NULL	NULL	NULL	NULL	NULL	NULL	NULL	NULL	NULL
Nursing	Female	62	19.89	Lower GI	2020-03-09 07:36:39	2020-03-09 08:04:00	28	2020-03-09 07:59:02	5	2020-03-09 08:38:00	2020-03-09 08:42:12	4	2020-03-09 08:46:00	2020-03-09 10:06:00	66	80	NULL	NULL	NULL	NULL	NULL	NULL	NULL	NULL	NULL	NULL	NULL	0	NULL	NULL	NULL	NULL	NULL	NULL	NULL	NULL	NULL	NULL	NULL	NULL	NULL	NULL	NULL	NULL	NULL	NULL	NULL	NULL	NULL
Anesthesia	Female	83	21.32	DUAL	2021-10-21 16:10:00	2021-10-21 16:17:00	7	2021-10-21 16:09:00	8	2021-10-21 16:39:00	2021-10-21 16:42:19	3	2021-10-21 16:46:00	2021-10-21 17:25:00	32	39	0	0	0	0	0	0	1	0	0	1	0	2	NULL	NULL	NULL	NULL	NULL	NULL	NULL	NULL	NULL	NULL	NULL	NULL	NULL	NULL	NULL	NULL	NULL	NULL	NULL	NULL	NULL
Nursing	Female	48	27.67	Lower GI	2021-05-18 10:25:11	2021-05-18 10:43:00	18	2021-05-18 10:37:00	6	2021-05-18 11:04:00	2021-05-18 11:06:49	2	2021-05-18 11:12:00	2021-05-18 11:57:00	41	45	0	0	0	0	0	1	0	0	0	0	0	1	NULL	NULL	NULL	NULL	NULL	NULL	NULL	NULL	NULL	NULL	NULL	NULL	NULL	NULL	NULL	NULL	NULL	NULL	NULL	NULL	NULL
Nursing	Male	71	24.41	Lower GI	2021-06-17 13:12:40	2021-06-17 13:27:00	15	2021-06-17 13:17:00	10	2021-06-17 13:46:00	2021-06-17 13:51:57	5	2021-06-17 13:56:00	2021-06-17 15:20:00	39	84	0	0	0	0	0	0	0	1	0	0	1	2	NULL	NULL	NULL	NULL	NULL	NULL	NULL	NULL	NULL	NULL	NULL	NULL	NULL	NULL	NULL	NULL	NULL	NULL	NULL	NULL	NULL
Anesthesia	Female	74	22.31	Upper GI	2021-10-18 16:22:00	2021-10-18 16:28:00	6	2021-10-18 16:24:00	4	2021-10-18 16:37:00	2021-10-18 16:40:09	3	2021-10-18 16:42:00	2021-10-18 17:00:00	18	18	0	0	1	1	0	0	0	0	0	0	0	2	NULL	NULL	NULL	NULL	NULL	NULL	NULL	NULL	NULL	NULL	NULL	NULL	NULL	NULL	NULL	NULL	NULL	NULL	NULL	NULL	NULL
Nursing	Female	60	29.75	DUAL	2021-05-13 11:02:03	2021-05-13 11:32:00	30	2021-05-13 11:20:23	12	2021-05-13 12:13:00	2021-05-13 12:21:26	8	2021-05-13 12:26:00	2021-05-13 13:43:00	79	77	NULL	NULL	NULL	NULL	NULL	NULL	NULL	NULL	NULL	NULL	NULL	0	NULL	NULL	NULL	NULL	NULL	NULL	NULL	NULL	NULL	NULL	NULL	NULL	NULL	NULL	NULL	NULL	NULL	NULL	NULL	NULL	NULL
Anesthesia	Male	61	23.15	Lower GI	2021-10-06 13:58:28	2021-10-06 14:08:00	10	2021-10-06 14:00:00	8	2021-10-06 14:27:00	2021-10-06 14:29:42	2	2021-10-06 14:31:00	2021-10-06 15:15:00	31	44	NULL	NULL	NULL	NULL	NULL	NULL	NULL	NULL	NULL	NULL	NULL	0	NULL	NULL	NULL	NULL	NULL	NULL	NULL	NULL	NULL	NULL	NULL	NULL	NULL	NULL	NULL	NULL	NULL	NULL	NULL	NULL	NULL
Nursing	Female	67	43.85	Lower GI	2021-03-26 08:54:35	2021-03-26 09:20:00	26	2021-03-26 09:10:38	10	2021-03-26 09:35:00	2021-03-26 09:40:39	5	2021-03-26 09:45:00	2021-03-26 10:48:00	46	63	0	0	0	0	0	0	0	1	0	0	0	1	NULL	NULL	NULL	NULL	NULL	NULL	NULL	NULL	NULL	NULL	NULL	NULL	NULL	NULL	NULL	NULL	NULL	NULL	NULL	NULL	NULL
Anesthesia	Female	68	17.96	Upper GI	2021-08-26 10:06:50	2021-08-26 10:09:00	3	2021-08-26 10:03:00	6	2021-08-26 10:23:00	2021-08-26 10:24:42	1	2021-08-26 10:30:00	2021-08-26 11:17:00	18	47	1	1	0	1	0	0	0	1	0	0	0	4	NULL	NULL	NULL	NULL	NULL	NULL	NULL	NULL	NULL	NULL	NULL	NULL	NULL	NULL	NULL	NULL	NULL	NULL	NULL	NULL	NULL
Anesthesia	Female	62	47.05	Lower GI	2021-10-13 14:42:42	2021-10-13 14:57:00	15	2021-10-13 14:38:00	19	2021-10-13 15:09:00	2021-10-13 15:19:25	10	2021-10-13 15:15:00	2021-10-13 16:18:00	37	63	1	1	0	1	0	1	1	1	0	1	0	7	NULL	NULL	NULL	NULL	NULL	NULL	NULL	NULL	NULL	NULL	NULL	NULL	NULL	NULL	NULL	NULL	NULL	NULL	NULL	NULL	NULL
Nursing	Female	61	21.26	Lower GI	2020-01-30 14:00:16	2020-01-30 14:53:00	53	2020-01-30 14:40:00	13	2020-01-30 15:22:00	2020-01-30 15:25:00	3	2020-01-30 15:34:00	2020-01-30 16:20:00	85	46	NULL	NULL	NULL	NULL	NULL	NULL	NULL	NULL	NULL	NULL	NULL	0	NULL	NULL	NULL	NULL	NULL	NULL	NULL	NULL	NULL	NULL	NULL	NULL	NULL	NULL	NULL	NULL	NULL	NULL	NULL	NULL	NULL
Nursing	Female	70	31.18	Lower GI	2021-03-30 07:49:00	2021-03-30 08:19:00	30	2021-03-30 08:10:00	9	2021-03-30 08:47:00	2021-03-30 08:50:58	3	2021-03-30 08:57:00	2021-03-30 09:36:00	61	39	1	1	1	1	0	1	1	0	1	1	0	8	NULL	NULL	NULL	NULL	NULL	NULL	NULL	NULL	NULL	NULL	NULL	NULL	NULL	NULL	NULL	NULL	NULL	NULL	NULL	NULL	NULL
Nursing	Male	55	29.62	Lower GI	2020-08-05 06:55:50	2020-08-05 07:11:00	16	2020-08-05 07:03:57	8	2020-08-05 07:26:00	2020-08-05 07:28:54	2	2020-08-05 07:32:00	2020-08-05 07:51:00	33	19	NULL	NULL	NULL	NULL	NULL	NULL	NULL	NULL	NULL	NULL	NULL	0	NULL	NULL	NULL	NULL	NULL	NULL	NULL	NULL	NULL	NULL	NULL	NULL	NULL	NULL	NULL	NULL	NULL	NULL	NULL	NULL	NULL
Nursing	Female	55	40.35	Lower GI	2020-02-03 07:56:43	2020-02-03 08:35:00	39	2020-02-03 08:26:33	9	2020-02-03 08:55:00	2020-02-03 09:01:06	6	2020-02-03 09:05:00	2020-02-03 09:37:00	65	32	1	0	0	0	0	0	0	0	0	0	0	1	NULL	NULL	NULL	NULL	NULL	NULL	NULL	NULL	NULL	NULL	NULL	NULL	NULL	NULL	NULL	NULL	NULL	NULL	NULL	NULL	NULL
Nursing	Female	47	33.97	Upper GI	2020-07-21 08:28:09	2020-07-21 08:40:00	12	2020-07-21 08:28:00	12	2020-07-21 08:57:00	2020-07-21 09:02:07	5	2020-07-21 09:05:00	2020-07-21 09:38:00	34	33	1	0	0	0	0	1	0	0	0	0	0	2	NULL	NULL	NULL	NULL	NULL	NULL	NULL	NULL	NULL	NULL	NULL	NULL	NULL	NULL	NULL	NULL	NULL	NULL	NULL	NULL	NULL
Nursing	Female	61	29.99	DUAL	2020-08-04 10:38:17	2020-08-04 11:24:00	46	2020-08-04 11:18:02	6	2020-08-04 12:32:00	2020-08-04 12:43:04	11	2020-08-04 12:49:00	2020-08-04 13:30:00	125	41	1	1	0	0	0	0	0	0	0	0	0	2	NULL	NULL	NULL	NULL	NULL	NULL	NULL	NULL	NULL	NULL	NULL	NULL	NULL	NULL	NULL	NULL	NULL	NULL	NULL	NULL	NULL
Nursing	Male	56	31.95	Lower GI	2021-04-21 10:20:07	2021-04-21 11:04:00	44	2021-04-21 10:58:58	6	2021-04-21 11:20:00	2021-04-21 11:23:40	3	2021-04-21 11:30:00	2021-04-21 12:34:00	63	64	0	0	0	0	0	1	1	0	0	1	0	3	NULL	NULL	NULL	NULL	NULL	NULL	NULL	NULL	NULL	NULL	NULL	NULL	NULL	NULL	NULL	NULL	NULL	NULL	NULL	NULL	NULL
Nursing	Female	54	22.6	Lower GI	2020-05-18 14:36:45	2020-05-18 15:07:00	31	2020-05-18 14:58:24	9	2020-05-18 15:27:00	2020-05-18 15:30:30	3	2020-05-18 15:35:00	2020-05-18 16:19:00	54	44	NULL	NULL	NULL	NULL	NULL	NULL	NULL	NULL	NULL	NULL	NULL	0	NULL	NULL	NULL	NULL	NULL	NULL	NULL	NULL	NULL	NULL	NULL	NULL	NULL	NULL	NULL	NULL	NULL	NULL	NULL	NULL	NULL
Nursing	Male	72	22.96	Lower GI	2020-10-14 14:15:55	2020-10-14 15:05:00	50	2020-10-14 14:56:05	9	2020-10-14 15:38:00	2020-10-14 15:39:20	1	2020-10-14 15:40:00	2020-10-14 16:00:00	84	20	NULL	NULL	NULL	NULL	NULL	NULL	NULL	NULL	NULL	NULL	NULL	0	NULL	NULL	NULL	NULL	NULL	NULL	NULL	NULL	NULL	NULL	NULL	NULL	NULL	NULL	NULL	NULL	NULL	NULL	NULL	NULL	NULL
Nursing	Male	64	24.66	Lower GI	2020-08-11 11:56:14	2020-08-11 12:36:00	40	2020-08-11 12:23:23	13	2020-08-11 12:45:00	2020-08-11 12:48:53	3	2020-08-11 12:53:00	2020-08-11 14:09:00	52	76	0	0	0	1	0	1	1	0	0	1	0	4	NULL	NULL	NULL	NULL	NULL	NULL	NULL	NULL	NULL	NULL	NULL	NULL	NULL	NULL	NULL	NULL	NULL	NULL	NULL	NULL	NULL
Anesthesia	Male	50	25.84	Lower GI	2021-08-09 09:56:48	2021-08-09 10:13:00	17	2021-08-09 10:07:00	6	2021-08-09 10:33:00	2021-08-09 10:35:32	2	2021-08-09 10:38:00	2021-08-09 11:29:00	39	51	0	0	0	0	0	1	0	0	0	0	0	1	NULL	NULL	NULL	NULL	NULL	NULL	NULL	NULL	NULL	NULL	NULL	NULL	NULL	NULL	NULL	NULL	NULL	NULL	NULL	NULL	NULL
Anesthesia	Female	51	35.3	Upper GI	2021-09-27 16:13:37	2021-09-27 16:30:00	17	2021-09-27 16:26:00	4	2021-09-27 16:38:00	2021-09-27 16:39:02	1	2021-09-27 16:47:00	2021-09-27 17:19:00	26	32	NULL	NULL	NULL	NULL	NULL	NULL	NULL	NULL	NULL	NULL	NULL	0	NULL	NULL	NULL	NULL	NULL	NULL	NULL	NULL	NULL	NULL	NULL	NULL	NULL	NULL	NULL	NULL	NULL	NULL	NULL	NULL	NULL
Anesthesia	Male	38	29.69	Lower GI	2021-09-30 09:19:00	2021-09-30 09:30:00	11	2021-09-30 09:19:00	11	2021-09-30 09:50:00	2021-09-30 09:55:00	5	2021-09-30 09:54:00	2021-09-30 10:30:00	36	36	0	0	0	0	0	0	0	0	0	0	1	1	NULL	NULL	NULL	NULL	NULL	NULL	NULL	NULL	NULL	NULL	NULL	NULL	NULL	NULL	NULL	NULL	NULL	NULL	NULL	NULL	NULL
Nursing	Male	62	27.2	Lower GI	2020-09-14 09:02:53	2020-09-14 09:27:00	25	2020-09-14 09:18:29	9	2020-09-14 09:37:00	2020-09-14 09:39:10	2	2020-09-14 09:43:00	2020-09-14 10:29:00	37	46	0	0	0	0	0	0	1	0	0	1	0	2	NULL	NULL	NULL	NULL	NULL	NULL	NULL	NULL	NULL	NULL	NULL	NULL	NULL	NULL	NULL	NULL	NULL	NULL	NULL	NULL	NULL
Anesthesia	Male	66	21.41	Lower GI	2021-10-26 10:50:00	2021-10-26 10:52:00	2	2021-10-26 10:46:00	6	2021-10-26 11:13:00	2021-10-26 11:15:18	2	2021-10-26 11:19:00	2021-10-26 11:57:00	25	38	NULL	NULL	NULL	NULL	NULL	NULL	NULL	NULL	NULL	NULL	NULL	0	NULL	NULL	NULL	NULL	NULL	NULL	NULL	NULL	NULL	NULL	NULL	NULL	NULL	NULL	NULL	NULL	NULL	NULL	NULL	NULL	NULL
Nursing	Male	67	24.75	Lower GI	2020-01-03 08:39:15	2020-01-03 09:39:00	60	2020-01-03 09:33:00	6	2020-01-03 09:51:00	2020-01-03 09:54:22	3	2020-01-03 09:57:00	2020-01-03 10:25:00	75	28	0	0	0	1	0	1	0	0	0	0	0	2	NULL	NULL	NULL	NULL	NULL	NULL	NULL	NULL	NULL	NULL	NULL	NULL	NULL	NULL	NULL	NULL	NULL	NULL	NULL	NULL	NULL
Nursing	Male	53	34.02	Upper GI	2021-05-19 15:26:03	2021-05-19 16:31:00	65	2021-05-19 16:20:00	11	2021-05-19 16:40:00	2021-05-19 16:42:56	2	2021-05-19 16:51:00	2021-05-19 17:31:00	76	40	0	0	0	0	0	1	0	1	0	0	0	2	NULL	NULL	NULL	NULL	NULL	NULL	NULL	NULL	NULL	NULL	NULL	NULL	NULL	NULL	NULL	NULL	NULL	NULL	NULL	NULL	NULL
Nursing	Female	75	24.33	DUAL	2020-05-13 07:46:38	2020-05-13 07:58:00	12	2020-05-13 07:51:22	7	2020-05-13 08:33:00	2020-05-13 08:37:27	4	2020-05-13 08:44:00	2020-05-13 09:17:00	51	33	1	1	0	0	0	0	0	0	0	0	0	2	NULL	NULL	NULL	NULL	NULL	NULL	NULL	NULL	NULL	NULL	NULL	NULL	NULL	NULL	NULL	NULL	NULL	NULL	NULL	NULL	NULL
Nursing	Male	68	23.71	Lower GI	2021-01-27 11:09:26	2021-01-27 11:32:00	23	2021-01-27 11:15:00	17	2021-01-27 11:56:00	2021-01-27 11:57:04	1	2021-01-27 12:05:00	2021-01-27 13:01:00	48	56	0	0	0	1	0	1	0	0	0	0	0	2	NULL	NULL	NULL	NULL	NULL	NULL	NULL	NULL	NULL	NULL	NULL	NULL	NULL	NULL	NULL	NULL	NULL	NULL	NULL	NULL	NULL
Nursing	Male	54	25.06	Lower GI	2020-08-25 08:54:10	2020-08-25 09:09:00	15	2020-08-25 09:02:36	7	2020-08-25 09:38:00	2020-08-25 09:40:30	2	2020-08-25 09:43:00	2020-08-25 10:15:00	46	32	0	1	0	0	0	1	0	0	0	0	0	2	NULL	NULL	NULL	NULL	NULL	NULL	NULL	NULL	NULL	NULL	NULL	NULL	NULL	NULL	NULL	NULL	NULL	NULL	NULL	NULL	NULL
Nursing	Female	74	20.47	Upper GI	2020-06-16 14:41:39	2020-06-16 15:41:00	60	2020-06-16 15:32:00	9	2020-06-16 15:47:00	2020-06-16 15:50:17	3	2020-06-16 15:57:00	2020-06-16 16:36:00	69	39	NULL	NULL	NULL	NULL	NULL	NULL	NULL	NULL	NULL	NULL	NULL	0	NULL	NULL	NULL	NULL	NULL	NULL	NULL	NULL	NULL	NULL	NULL	NULL	NULL	NULL	NULL	NULL	NULL	NULL	NULL	NULL	NULL
Nursing	Female	58	27.46	Upper GI	2020-11-17 15:07:56	2020-11-17 15:49:00	42	2020-11-17 15:35:12	14	2020-11-17 15:52:00	2020-11-17 15:55:28	3	2020-11-17 16:00:00	2020-11-17 17:00:00	48	60	0	0	1	1	0	0	0	1	0	0	0	3	NULL	NULL	NULL	NULL	NULL	NULL	NULL	NULL	NULL	NULL	NULL	NULL	NULL	NULL	NULL	NULL	NULL	NULL	NULL	NULL	NULL
Nursing	Female	73	18.29	Lower GI	2020-02-03 09:56:32	2020-02-03 10:17:00	21	2020-02-03 10:08:38	9	2020-02-03 10:34:00	2020-02-03 10:37:55	3	2020-02-03 10:41:00	2020-02-03 11:40:00	41	59	0	0	0	0	0	1	0	0	1	0	1	3	NULL	NULL	NULL	NULL	NULL	NULL	NULL	NULL	NULL	NULL	NULL	NULL	NULL	NULL	NULL	NULL	NULL	NULL	NULL	NULL	NULL
Nursing	Female	47	31	Upper GI	2021-03-17 15:43:25	2021-03-17 16:36:00	53	2021-03-17 16:24:40	12	2021-03-17 16:43:00	2021-03-17 16:48:26	5	2021-03-17 16:56:00	2021-03-17 17:45:00	65	49	NULL	NULL	NULL	NULL	NULL	NULL	NULL	NULL	NULL	NULL	NULL	0	NULL	NULL	NULL	NULL	NULL	NULL	NULL	NULL	NULL	NULL	NULL	NULL	NULL	NULL	NULL	NULL	NULL	NULL	NULL	NULL	NULL
Nursing	Female	52	39.54	Lower GI	2021-03-10 11:37:39	2021-03-10 11:48:00	11	2021-03-10 11:39:00	9	2021-03-10 12:01:00	2021-03-10 12:04:18	3	2021-03-10 12:09:00	2021-03-10 13:00:00	27	51	0	0	0	0	0	1	0	0	0	0	0	1	NULL	NULL	NULL	NULL	NULL	NULL	NULL	NULL	NULL	NULL	NULL	NULL	NULL	NULL	NULL	NULL	NULL	NULL	NULL	NULL	NULL
Nursing	Male	60	23.71	Lower GI	2020-11-02 06:53:04	2020-11-02 07:45:00	52	2020-11-02 07:34:46	11	2020-11-02 08:00:00	2020-11-02 08:02:37	2	2020-11-02 08:10:00	2020-11-02 08:34:00	69	24	0	1	0	0	0	1	0	0	0	0	0	2	NULL	NULL	NULL	NULL	NULL	NULL	NULL	NULL	NULL	NULL	NULL	NULL	NULL	NULL	NULL	NULL	NULL	NULL	NULL	NULL	NULL
Anesthesia	Male	64	24.37	Lower GI	2021-08-03 07:26:05	2021-08-03 07:42:00	16	2021-08-03 07:37:00	5	2021-08-03 08:09:00	2021-08-03 08:13:31	4	2021-08-03 08:20:00	2021-08-03 09:00:00	47	40	0	0	0	0	0	1	0	0	0	0	0	1	NULL	NULL	NULL	NULL	NULL	NULL	NULL	NULL	NULL	NULL	NULL	NULL	NULL	NULL	NULL	NULL	NULL	NULL	NULL	NULL	NULL
Nursing	Female	56	32.61	DUAL	2021-02-05 10:35:19	2021-02-05 11:32:00	57	2021-02-05 11:20:00	12	2021-02-05 12:17:00	2021-02-05 12:23:15	6	2021-02-05 12:30:00	2021-02-05 13:20:00	108	50	NULL	NULL	NULL	NULL	NULL	NULL	NULL	NULL	NULL	NULL	NULL	0	NULL	NULL	NULL	NULL	NULL	NULL	NULL	NULL	NULL	NULL	NULL	NULL	NULL	NULL	NULL	NULL	NULL	NULL	NULL	NULL	NULL
Nursing	Male	66	21.81	DUAL	2021-03-17 13:01:51	2021-03-17 13:41:00	40	2021-03-17 13:29:36	12	2021-03-17 14:17:00	2021-03-17 14:25:00	8	2021-03-17 14:29:00	2021-03-17 15:15:00	84	46	0	0	0	1	0	0	0	0	0	0	0	1	NULL	NULL	NULL	NULL	NULL	NULL	NULL	NULL	NULL	NULL	NULL	NULL	NULL	NULL	NULL	NULL	NULL	NULL	NULL	NULL	NULL
Nursing	Female	66	NULL	Lower GI	2020-03-04 11:28:34	2020-03-04 11:44:00	16	2020-03-04 11:36:00	8	2020-03-04 12:23:00	2020-03-04 12:26:57	3	2020-03-04 12:33:00	2020-03-04 13:30:00	58	57	0	0	0	0	0	1	1	0	0	1	0	3	NULL	NULL	NULL	NULL	NULL	NULL	NULL	NULL	NULL	NULL	NULL	NULL	NULL	NULL	NULL	NULL	NULL	NULL	NULL	NULL	NULL
Nursing	Male	33	27.94	Lower GI	2020-10-21 12:54:07	2020-10-21 13:06:00	12	2020-10-21 13:00:00	6	2020-10-21 13:15:00	2020-10-21 13:18:44	3	2020-10-21 13:23:00	2020-10-21 13:39:00	24	16	NULL	NULL	NULL	NULL	NULL	NULL	NULL	NULL	NULL	NULL	NULL	0	NULL	NULL	NULL	NULL	NULL	NULL	NULL	NULL	NULL	NULL	NULL	NULL	NULL	NULL	NULL	NULL	NULL	NULL	NULL	NULL	NULL
Nursing	Male	58	NULL	Upper GI	2020-02-25 09:17:34	2020-02-25 10:30:00	73	2020-02-25 10:16:23	14	2020-02-25 10:34:00	2020-02-25 10:36:47	2	2020-02-25 10:42:00	2020-02-25 11:11:00	79	29	0	0	1	1	0	1	0	0	0	0	0	3	NULL	NULL	NULL	NULL	NULL	NULL	NULL	NULL	NULL	NULL	NULL	NULL	NULL	NULL	NULL	NULL	NULL	NULL	NULL	NULL	NULL
Nursing	Male	58	26.3	Lower GI	2020-06-23 08:15:16	2020-06-23 08:52:00	37	2020-06-23 08:40:04	12	2020-06-23 09:27:00	2020-06-23 09:30:09	3	2020-06-23 09:34:00	2020-06-23 10:00:00	75	26	0	0	1	1	0	1	0	0	0	0	0	3	NULL	NULL	NULL	NULL	NULL	NULL	NULL	NULL	NULL	NULL	NULL	NULL	NULL	NULL	NULL	NULL	NULL	NULL	NULL	NULL	NULL
Nursing	Male	69	27.32	Lower GI	2020-07-22 08:15:24	2020-07-22 08:31:00	16	2020-07-22 08:19:57	12	2020-07-22 08:56:00	2020-07-22 08:58:18	2	2020-07-22 09:01:00	2020-07-22 09:37:00	43	36	0	0	0	1	0	0	1	1	0	1	0	4	NULL	NULL	NULL	NULL	NULL	NULL	NULL	NULL	NULL	NULL	NULL	NULL	NULL	NULL	NULL	NULL	NULL	NULL	NULL	NULL	NULL
Nursing	Female	73	19.31	DUAL	2020-11-25 10:13:12	2020-11-25 10:30:00	17	2020-11-25 10:23:00	7	2020-11-25 11:15:00	2020-11-25 11:19:47	4	2020-11-25 11:26:00	2020-11-25 12:00:00	66	34	0	0	0	1	0	0	0	0	0	0	0	1	NULL	NULL	NULL	NULL	NULL	NULL	NULL	NULL	NULL	NULL	NULL	NULL	NULL	NULL	NULL	NULL	NULL	NULL	NULL	NULL	NULL
Nursing	Female	60	29.12	Lower GI	2020-08-19 12:32:59	2020-08-19 13:04:00	32	2020-08-19 12:56:00	8	2020-08-19 13:30:00	2020-08-19 13:37:38	7	2020-08-19 13:42:00	2020-08-19 14:10:00	65	28	NULL	NULL	NULL	NULL	NULL	NULL	NULL	NULL	NULL	NULL	NULL	0	NULL	NULL	NULL	NULL	NULL	NULL	NULL	NULL	NULL	NULL	NULL	NULL	NULL	NULL	NULL	NULL	NULL	NULL	NULL	NULL	NULL
Nursing	Female	55	30.9	Upper GI	2020-06-27 12:12:19	2020-06-27 12:27:00	15	2020-06-27 12:20:00	7	2020-06-27 12:34:00	2020-06-27 12:40:51	6	2020-06-27 07:00:00	2020-06-27 13:15:00	28	375	NULL	NULL	NULL	NULL	NULL	NULL	NULL	NULL	NULL	NULL	NULL	0	NULL	NULL	NULL	NULL	5	mg	NULL	NULL	NULL	NULL	150	mcg	NULL	NULL	NULL	NULL	NULL	NULL	NULL	NULL	NULL
Anesthesia	Female	63	24.59	Lower GI	2021-10-14 08:40:00	2021-10-14 08:47:00	7	2021-10-14 08:42:00	5	2021-10-14 09:09:00	2021-10-14 09:13:27	4	2021-10-14 09:17:00	2021-10-14 09:41:00	33	24	NULL	NULL	NULL	NULL	NULL	NULL	NULL	NULL	NULL	NULL	NULL	0	NULL	NULL	NULL	NULL	NULL	NULL	NULL	NULL	NULL	NULL	NULL	NULL	NULL	NULL	NULL	NULL	NULL	NULL	NULL	NULL	NULL
Nursing	Male	59	25.37	Upper GI	2021-03-10 16:03:01	2021-03-10 16:32:00	29	2021-03-10 16:23:00	9	2021-03-10 16:43:00	2021-03-10 17:04:23	21	2021-03-10 16:55:00	2021-03-10 17:18:00	61	23	0	0	0	0	0	0	0	1	0	0	0	1	NULL	NULL	NULL	NULL	NULL	NULL	NULL	NULL	NULL	NULL	NULL	NULL	NULL	NULL	NULL	NULL	NULL	NULL	NULL	NULL	NULL
Anesthesia	Male	59	25.06	Upper GI	2021-08-10 14:02:00	2021-08-10 14:09:00	7	2021-08-10 14:01:00	8	2021-08-10 14:23:00	2021-08-10 14:24:34	1	2021-08-10 14:30:00	2021-08-10 14:45:00	22	15	0	0	0	0	0	0	0	1	0	0	0	1	NULL	NULL	NULL	NULL	NULL	NULL	NULL	NULL	NULL	NULL	NULL	NULL	NULL	NULL	NULL	NULL	NULL	NULL	NULL	NULL	NULL
Nursing	Male	62	28.27	Lower GI	2021-03-18 07:49:24	2021-03-18 08:46:00	57	2021-03-18 08:37:31	9	2021-03-18 09:05:00	2021-03-18 09:08:30	3	2021-03-18 09:13:00	2021-03-18 10:05:00	79	52	1	0	0	0	0	1	0	0	0	0	0	2	NULL	NULL	NULL	NULL	NULL	NULL	NULL	NULL	NULL	NULL	NULL	NULL	NULL	NULL	NULL	NULL	NULL	NULL	NULL	NULL	NULL
Anesthesia	Male	62	28.12	Upper GI	2021-10-14 09:42:57	2021-10-14 09:48:00	6	2021-10-14 09:42:00	6	2021-10-14 10:06:00	2021-10-14 10:09:34	3	2021-10-14 10:13:00	2021-10-14 10:30:00	27	17	1	0	0	0	0	1	0	0	0	0	0	2	NULL	NULL	NULL	NULL	NULL	NULL	NULL	NULL	NULL	NULL	NULL	NULL	NULL	NULL	NULL	NULL	NULL	NULL	NULL	NULL	NULL
Nursing	Female	44	32.57	Upper GI	2021-02-17 17:01:09	2021-02-17 17:50:00	49	2021-02-17 17:34:00	16	2021-02-17 17:51:00	2021-02-17 17:55:31	4	2021-02-17 18:00:00	2021-02-17 18:54:00	54	54	0	1	0	1	0	1	0	0	1	0	0	4	NULL	NULL	NULL	NULL	NULL	NULL	NULL	NULL	NULL	NULL	NULL	NULL	NULL	NULL	NULL	NULL	NULL	NULL	NULL	NULL	NULL
Nursing	Male	33	25.83	DUAL	2020-11-04 08:07:33	2020-11-04 08:39:00	32	2020-11-04 08:28:00	11	2020-11-04 09:05:00	2020-11-04 09:10:37	5	2020-11-04 09:14:00	2020-11-04 10:20:00	63	66	0	1	0	0	0	0	0	0	0	0	0	1	NULL	NULL	NULL	NULL	NULL	NULL	NULL	NULL	NULL	NULL	NULL	NULL	NULL	NULL	NULL	NULL	NULL	NULL	NULL	NULL	NULL
Nursing	Female	54	21.09	Lower GI	2020-02-20 07:10:19	2020-02-20 08:40:00	90	2020-02-20 08:28:33	12	2020-02-20 08:47:00	2020-02-20 08:50:47	3	2020-02-20 09:00:00	2020-02-20 09:50:00	100	50	0	0	0	1	0	0	0	0	0	0	0	1	NULL	NULL	NULL	NULL	NULL	NULL	NULL	NULL	NULL	NULL	NULL	NULL	NULL	NULL	NULL	NULL	NULL	NULL	NULL	NULL	NULL
Nursing	Female	55	20.51	Lower GI	2021-01-14 14:37:16	2021-01-14 15:13:00	36	2021-01-14 14:58:56	15	2021-01-14 15:47:00	2021-01-14 15:48:45	1	2021-01-14 15:59:00	2021-01-14 16:38:00	71	39	0	0	0	1	0	0	0	0	0	0	0	1	NULL	NULL	NULL	NULL	NULL	NULL	NULL	NULL	NULL	NULL	NULL	NULL	NULL	NULL	NULL	NULL	NULL	NULL	NULL	NULL	NULL
Nursing	Male	74	24.69	Lower GI	2020-12-29 07:30:26	2020-12-29 08:02:00	32	2020-12-29 08:00:00	2	2020-12-29 08:36:00	2020-12-29 08:38:28	2	2020-12-29 08:51:00	2020-12-29 09:54:00	68	63	0	0	0	0	0	1	0	0	0	0	0	1	NULL	NULL	NULL	NULL	NULL	NULL	NULL	NULL	NULL	NULL	NULL	NULL	NULL	NULL	NULL	NULL	NULL	NULL	NULL	NULL	NULL
Nursing	Male	75	24.69	Lower GI	2021-01-29 14:27:01	2021-01-29 14:49:00	22	2021-01-29 14:42:00	7	2021-01-29 15:02:00	2021-01-29 15:03:18	1	2021-01-29 15:12:00	2021-01-29 16:06:00	36	54	0	0	0	0	0	1	0	0	0	0	0	1	NULL	NULL	NULL	NULL	NULL	NULL	NULL	NULL	NULL	NULL	NULL	NULL	NULL	NULL	NULL	NULL	NULL	NULL	NULL	NULL	NULL
Anesthesia	Female	67	38.16	DUAL	2021-10-26 12:36:09	2021-10-26 13:23:00	47	2021-10-26 13:18:00	5	2021-10-26 14:00:00	2021-10-26 14:01:15	1	2021-10-26 14:10:00	2021-10-26 14:34:00	85	24	1	0	0	1	0	1	0	0	0	0	0	3	NULL	NULL	NULL	NULL	NULL	NULL	NULL	NULL	NULL	NULL	NULL	NULL	NULL	NULL	NULL	NULL	NULL	NULL	NULL	NULL	NULL
Nursing	Male	47	32.08	Upper GI	2021-02-09 08:15:05	2021-02-09 08:36:00	21	2021-02-09 08:25:00	11	2021-02-09 08:40:00	2021-02-09 08:46:00	6	2021-02-09 08:49:00	2021-02-09 09:15:00	31	26	1	1	0	1	0	1	1	0	0	1	0	6	NULL	NULL	NULL	NULL	NULL	NULL	NULL	NULL	NULL	NULL	NULL	NULL	NULL	NULL	NULL	NULL	NULL	NULL	NULL	NULL	NULL
Nursing	Female	36	24.92	DUAL	2020-08-26 16:01:45	2020-08-26 16:33:00	32	2020-08-26 16:19:13	14	2020-08-26 17:03:00	2020-08-26 17:08:46	5	2020-08-26 17:13:00	2020-08-26 18:17:00	67	64	NULL	NULL	NULL	NULL	NULL	NULL	NULL	NULL	NULL	NULL	NULL	0	NULL	NULL	NULL	NULL	NULL	NULL	NULL	NULL	NULL	NULL	NULL	NULL	NULL	NULL	NULL	NULL	NULL	NULL	NULL	NULL	NULL
Nursing	Female	73	25.75	Upper GI	2021-04-05 15:31:56	2021-04-05 16:25:00	54	2021-04-05 16:16:04	9	2021-04-05 16:34:00	2021-04-05 16:38:28	4	2021-04-05 16:46:00	2021-04-05 17:00:00	67	14	0	0	0	1	0	0	0	0	0	0	0	1	NULL	NULL	NULL	NULL	NULL	NULL	NULL	NULL	NULL	NULL	NULL	NULL	NULL	NULL	NULL	NULL	NULL	NULL	NULL	NULL	NULL
Anesthesia	Female	83	31.04	Upper GI	2021-08-10 13:41:35	2021-08-10 13:47:00	6	2021-08-10 13:42:00	5	2021-08-10 13:50:00	2021-08-10 13:54:13	4	2021-08-10 14:00:00	2021-08-10 14:33:00	13	33	0	1	0	0	0	0	0	1	0	0	0	2	NULL	NULL	NULL	NULL	NULL	NULL	NULL	NULL	NULL	NULL	NULL	NULL	NULL	NULL	NULL	NULL	NULL	NULL	NULL	NULL	NULL
Nursing	Female	62	30.45	Lower GI	2021-04-20 15:45:54	2021-04-20 16:48:00	63	2021-04-20 16:43:34	5	2021-04-20 17:09:00	2021-04-20 17:12:14	3	2021-04-20 17:17:00	2021-04-20 17:43:00	87	26	0	0	0	0	0	1	0	0	0	0	0	1	NULL	NULL	NULL	NULL	NULL	NULL	NULL	NULL	NULL	NULL	NULL	NULL	NULL	NULL	NULL	NULL	NULL	NULL	NULL	NULL	NULL
Nursing	Female	62	30.65	Lower GI	2021-05-19 12:51:44	2021-05-19 13:08:00	17	2021-05-19 13:04:00	4	2021-05-19 13:37:00	2021-05-19 13:38:51	1	2021-05-19 13:42:00	2021-05-19 13:46:00	47	4	0	0	0	1	0	1	0	0	0	0	0	2	NULL	NULL	NULL	NULL	NULL	NULL	NULL	NULL	NULL	NULL	NULL	NULL	NULL	NULL	NULL	NULL	NULL	NULL	NULL	NULL	NULL
Anesthesia	Female	65	31.09	Lower GI	2021-09-29 07:09:38	2021-09-29 07:35:00	26	2021-09-29 07:27:00	8	2021-09-29 08:02:00	2021-09-29 08:06:18	4	2021-09-29 08:10:00	2021-09-29 08:38:00	57	28	1	0	0	0	0	1	0	0	0	0	0	2	NULL	NULL	NULL	NULL	NULL	NULL	NULL	NULL	NULL	NULL	NULL	NULL	NULL	NULL	NULL	NULL	NULL	NULL	NULL	NULL	NULL
Nursing	Female	71	31.79	Lower GI	2021-03-25 07:01:46	2021-03-25 07:16:00	15	2021-03-25 07:07:00	9	2021-03-25 07:35:00	2021-03-25 07:58:34	23	2021-03-25 07:45:00	2021-03-25 08:23:00	57	38	NULL	NULL	NULL	NULL	NULL	NULL	NULL	NULL	NULL	NULL	NULL	0	NULL	NULL	NULL	NULL	NULL	NULL	NULL	NULL	NULL	NULL	NULL	NULL	NULL	NULL	NULL	NULL	NULL	NULL	NULL	NULL	NULL
Nursing	Female	70	33.05	Lower GI	2020-08-13 08:03:29	2020-08-13 08:38:00	35	2020-08-13 08:31:19	7	2020-08-13 08:46:00	2020-08-13 08:51:47	5	2020-08-13 09:00:00	2020-08-13 09:30:00	48	30	NULL	NULL	NULL	NULL	NULL	NULL	NULL	NULL	NULL	NULL	NULL	0	NULL	NULL	NULL	NULL	NULL	NULL	NULL	NULL	NULL	NULL	NULL	NULL	NULL	NULL	NULL	NULL	NULL	NULL	NULL	NULL	NULL
Nursing	Female	57	34.46	Lower GI	2021-01-27 06:52:14	2021-01-27 07:13:00	21	2021-01-27 07:06:00	7	2021-01-27 07:33:00	2021-01-27 07:37:13	4	2021-01-27 07:42:00	2021-01-27 08:23:00	45	41	NULL	NULL	NULL	NULL	NULL	NULL	NULL	NULL	NULL	NULL	NULL	0	NULL	NULL	NULL	NULL	NULL	NULL	NULL	NULL	NULL	NULL	NULL	NULL	NULL	NULL	NULL	NULL	NULL	NULL	NULL	NULL	NULL
Nursing	Female	77	18.46	Upper GI	2021-05-14 08:59:16	2021-05-14 09:18:00	19	2021-05-14 09:12:06	6	2021-05-14 09:23:00	2021-05-14 09:25:39	2	2021-05-14 09:30:00	2021-05-14 10:14:00	26	44	0	0	0	0	0	0	0	0	0	0	1	1	NULL	NULL	NULL	NULL	NULL	NULL	NULL	NULL	NULL	NULL	NULL	NULL	NULL	NULL	NULL	NULL	NULL	NULL	NULL	NULL	NULL
Anesthesia	Male	72	25.83	Upper GI	2021-09-07 11:57:28	2021-09-07 12:02:00	5	2021-09-07 11:57:00	5	2021-09-07 12:39:00	2021-09-07 12:42:42	3	2021-09-07 12:44:00	2021-09-07 14:44:00	45	120	0	0	0	0	0	1	0	1	0	0	0	2	NULL	NULL	NULL	NULL	NULL	NULL	NULL	NULL	NULL	NULL	NULL	NULL	NULL	NULL	NULL	NULL	NULL	NULL	NULL	NULL	NULL
Nursing	Male	71	24.39	Upper GI	2020-06-16 13:27:17	2020-06-16 13:44:00	17	2020-06-16 13:35:28	9	2020-06-16 13:51:00	2020-06-16 13:55:25	4	2020-06-16 13:59:00	2020-06-16 15:00:00	28	61	0	0	0	0	0	1	0	1	0	0	0	2	NULL	NULL	NULL	NULL	NULL	NULL	NULL	NULL	NULL	NULL	NULL	NULL	NULL	NULL	NULL	NULL	NULL	NULL	NULL	NULL	NULL
Nursing	Male	71	24.67	DUAL	2020-02-27 15:01:46	2020-02-27 15:17:00	16	2020-02-27 15:12:42	5	2020-02-27 16:05:00	2020-02-27 16:11:14	6	2020-02-27 16:17:00	2020-02-27 17:04:00	70	47	0	0	0	0	0	1	0	1	0	0	0	2	NULL	NULL	NULL	NULL	NULL	NULL	NULL	NULL	NULL	NULL	NULL	NULL	NULL	NULL	NULL	NULL	NULL	NULL	NULL	NULL	NULL
Nursing	Male	78	30.41	DUAL	2021-02-12 11:05:33	2021-02-12 11:47:00	42	2021-02-12 11:35:00	12	2021-02-12 12:34:00	2021-02-12 12:35:59	1	2021-02-12 12:46:00	2021-02-12 14:23:00	90	97	1	0	0	1	0	0	1	1	0	1	1	6	NULL	NULL	NULL	NULL	NULL	NULL	NULL	NULL	NULL	NULL	NULL	NULL	NULL	NULL	NULL	NULL	NULL	NULL	NULL	NULL	NULL
Anesthesia	Female	53	24.33	Lower GI	2021-08-09 11:14:59	2021-08-09 11:19:00	5	2021-08-09 11:12:00	7	2021-08-09 11:36:00	2021-08-09 11:38:44	2	2021-08-09 11:42:00	2021-08-09 12:10:00	24	28	0	1	0	0	0	0	0	0	0	0	0	1	NULL	NULL	NULL	NULL	NULL	NULL	NULL	NULL	NULL	NULL	NULL	NULL	NULL	NULL	NULL	NULL	NULL	NULL	NULL	NULL	NULL
Nursing	Female	58	23.03	Upper GI	2021-05-25 07:30:00	2021-05-25 08:03:00	33	2021-05-25 07:54:00	9	2021-05-25 08:09:00	2021-05-25 08:13:55	4	2021-05-25 08:18:00	2021-05-25 08:43:00	43	25	0	1	0	0	0	0	0	1	0	0	0	2	NULL	NULL	NULL	NULL	NULL	NULL	NULL	NULL	NULL	NULL	NULL	NULL	NULL	NULL	NULL	NULL	NULL	NULL	NULL	NULL	NULL
Anesthesia	Female	80	34.75	Lower GI	2021-10-14 16:30:43	2021-10-14 16:44:00	14	2021-10-14 16:36:00	8	2021-10-14 16:47:00	2021-10-14 16:53:32	6	2021-10-14 16:51:00	2021-10-14 17:22:00	23	31	1	1	0	1	0	1	1	0	0	1	0	6	NULL	NULL	NULL	NULL	NULL	NULL	NULL	NULL	NULL	NULL	NULL	NULL	NULL	NULL	NULL	NULL	NULL	NULL	NULL	NULL	NULL
Nursing	Female	57	28.32	Lower GI	2021-05-19 08:41:20	2021-05-19 08:55:00	14	2021-05-19 08:48:25	7	2021-05-19 09:14:00	2021-05-19 09:20:41	6	2021-05-19 09:26:00	2021-05-19 09:48:00	39	22	1	0	0	0	0	0	0	0	0	0	0	1	NULL	NULL	NULL	NULL	NULL	NULL	NULL	NULL	NULL	NULL	NULL	NULL	NULL	NULL	NULL	NULL	NULL	NULL	NULL	NULL	NULL
Anesthesia	Female	62	20.49	Lower GI	2021-09-30 16:16:00	2021-09-30 16:24:00	8	2021-09-30 16:17:00	7	2021-09-30 16:40:00	2021-09-30 16:43:00	3	2021-09-30 16:45:00	2021-09-30 17:15:00	27	30	0	1	0	0	0	0	0	0	0	0	0	1	NULL	NULL	NULL	NULL	NULL	NULL	NULL	NULL	NULL	NULL	NULL	NULL	NULL	NULL	NULL	NULL	NULL	NULL	NULL	NULL	NULL
Nursing	Female	75	28.34	Lower GI	2021-02-16 10:20:21	2021-02-16 10:56:00	36	2021-02-16 10:49:00	7	2021-02-16 11:24:00	2021-02-16 11:25:31	1	2021-02-16 11:33:00	2021-02-16 12:00:00	65	27	0	0	0	1	0	1	0	0	0	0	0	2	NULL	NULL	NULL	NULL	NULL	NULL	NULL	NULL	NULL	NULL	NULL	NULL	NULL	NULL	NULL	NULL	NULL	NULL	NULL	NULL	NULL
Nursing	Female	66	25.83	DUAL	2021-06-17 15:29:39	2021-06-17 15:47:00	18	2021-06-17 15:32:00	15	2021-06-17 16:07:00	2021-06-17 16:44:23	37	2021-06-17 16:36:00	2021-06-17 16:49:00	75	13	NULL	NULL	NULL	NULL	NULL	NULL	NULL	NULL	NULL	NULL	NULL	0	NULL	NULL	NULL	NULL	NULL	NULL	NULL	NULL	NULL	NULL	NULL	NULL	NULL	NULL	NULL	NULL	NULL	NULL	NULL	NULL	NULL
Nursing	Male	72	27.38	Lower GI	2021-06-08 15:28:02	2021-06-08 16:05:00	37	2021-06-08 15:53:20	12	2021-06-08 16:24:00	2021-06-08 16:27:15	3	2021-06-08 16:30:00	2021-06-08 16:46:00	59	16	1	0	0	1	0	1	0	0	0	0	0	3	NULL	NULL	NULL	NULL	NULL	NULL	NULL	NULL	NULL	NULL	NULL	NULL	NULL	NULL	NULL	NULL	NULL	NULL	NULL	NULL	NULL
Nursing	Female	69	17.97	Lower GI	2021-06-09 11:23:14	2021-06-09 11:42:00	19	2021-06-09 11:34:00	8	2021-06-09 11:56:00	2021-06-09 12:01:23	5	2021-06-09 12:04:00	2021-06-09 12:32:00	38	28	NULL	NULL	NULL	NULL	NULL	NULL	NULL	NULL	NULL	NULL	NULL	0	NULL	NULL	NULL	NULL	NULL	NULL	NULL	NULL	NULL	NULL	NULL	NULL	NULL	NULL	NULL	NULL	NULL	NULL	NULL	NULL	NULL
Anesthesia	Female	57	24.13	Lower GI	2021-09-10 13:13:38	2021-09-10 13:16:00	3	2021-09-10 13:10:00	6	2021-09-10 14:11:00	2021-09-10 14:17:23	6	2021-09-10 14:17:00	2021-09-10 15:01:00	64	44	0	1	0	0	0	0	0	1	0	0	0	2	NULL	NULL	NULL	NULL	NULL	NULL	NULL	NULL	NULL	NULL	NULL	NULL	NULL	NULL	NULL	NULL	NULL	NULL	NULL	NULL	NULL
Nursing	Female	57	24.13	Lower GI	2021-03-10 12:59:52	2021-03-10 13:09:00	10	2021-03-10 13:01:00	8	2021-03-10 13:38:00	2021-03-10 13:40:47	2	2021-03-10 13:50:00	2021-03-10 14:25:00	41	35	0	1	0	0	0	0	0	1	0	0	0	2	NULL	NULL	NULL	NULL	NULL	NULL	NULL	NULL	NULL	NULL	NULL	NULL	NULL	NULL	NULL	NULL	NULL	NULL	NULL	NULL	NULL
Nursing	Male	59	33.67	Lower GI	2020-10-22 11:09:03	2020-10-22 11:32:00	23	2020-10-22 11:22:49	10	2020-10-22 11:51:00	2020-10-22 11:55:40	4	2020-10-22 11:09:00	2020-10-22 12:23:00	46	74	0	0	0	0	0	1	0	0	0	0	0	1	NULL	NULL	NULL	NULL	NULL	NULL	NULL	NULL	NULL	NULL	150	mcg	NULL	NULL	NULL	NULL	NULL	NULL	NULL	NULL	NULL
Nursing	Female	64	20.37	Lower GI	2020-06-01 15:30:20	2020-06-01 16:04:00	34	2020-06-01 15:57:53	7	2020-06-01 16:38:00	2020-06-01 16:43:20	5	2020-06-01 16:47:00	2020-06-01 17:29:00	73	42	NULL	NULL	NULL	NULL	NULL	NULL	NULL	NULL	NULL	NULL	NULL	0	4	mg	NULL	NULL	NULL	NULL	NULL	NULL	NULL	NULL	NULL	NULL	NULL	NULL	NULL	NULL	NULL	NULL	NULL	NULL	NULL
Nursing	Female	50	34.86	Lower GI	2020-01-15 09:56:16	2020-01-15 10:27:00	31	2020-01-15 10:18:49	9	2020-01-15 10:51:00	2020-01-15 10:52:12	1	2020-01-15 11:05:00	2020-01-15 12:40:00	56	95	NULL	NULL	NULL	NULL	NULL	NULL	NULL	NULL	NULL	NULL	NULL	0	NULL	NULL	NULL	NULL	NULL	NULL	NULL	NULL	NULL	NULL	NULL	NULL	NULL	NULL	NULL	NULL	NULL	NULL	NULL	NULL	NULL
Anesthesia	Male	62	26.25	Lower GI	2021-09-23 16:44:18	2021-09-23 16:49:00	5	2021-09-23 16:44:00	5	2021-09-23 17:10:00	2021-09-23 17:11:21	1	2021-09-23 17:15:00	2021-09-23 17:26:00	27	11	0	0	0	1	0	1	0	0	0	0	0	2	NULL	NULL	NULL	NULL	NULL	NULL	NULL	NULL	NULL	NULL	NULL	NULL	NULL	NULL	NULL	NULL	NULL	NULL	NULL	NULL	NULL
Nursing	Male	32	29.84	Lower GI	2021-02-01 14:03:01	2021-02-01 14:33:00	30	2021-02-01 14:20:00	13	2021-02-01 14:48:00	2021-02-01 14:51:21	3	2021-02-01 14:56:00	2021-02-01 15:15:00	48	19	0	0	0	0	0	0	0	1	0	0	0	1	NULL	NULL	NULL	NULL	NULL	NULL	NULL	NULL	NULL	NULL	NULL	NULL	NULL	NULL	NULL	NULL	NULL	NULL	NULL	NULL	NULL
Anesthesia	Female	67	30.51	Lower GI	2021-09-22 08:00:00	2021-09-22 08:08:00	8	2021-09-22 07:59:00	9	2021-09-22 08:30:00	2021-09-22 08:50:13	20	2021-09-22 08:35:00	2021-09-22 09:03:00	50	28	1	1	0	1	0	1	0	1	0	0	0	5	NULL	NULL	NULL	NULL	NULL	NULL	NULL	NULL	NULL	NULL	NULL	NULL	NULL	NULL	NULL	NULL	NULL	NULL	NULL	NULL	NULL
Nursing	Female	59	27.81	Lower GI	2021-05-13 11:48:00	2021-05-13 11:59:00	11	2021-05-13 11:53:00	6	2021-05-13 12:27:00	2021-05-13 12:32:04	5	2021-05-13 12:40:00	2021-05-13 13:37:00	44	57	NULL	NULL	NULL	NULL	NULL	NULL	NULL	NULL	NULL	NULL	NULL	0	NULL	NULL	NULL	NULL	NULL	NULL	NULL	NULL	NULL	NULL	NULL	NULL	NULL	NULL	NULL	NULL	NULL	NULL	NULL	NULL	NULL
Nursing	Female	58	28.29	Lower GI	2020-10-05 09:34:11	2020-10-05 09:48:00	14	2020-10-05 09:41:57	7	2020-10-05 10:07:00	2020-10-05 10:09:49	2	2020-10-05 10:12:00	2020-10-05 10:30:00	35	18	0	0	0	0	0	1	0	0	0	0	0	1	NULL	NULL	NULL	NULL	NULL	NULL	NULL	NULL	NULL	NULL	NULL	NULL	NULL	NULL	NULL	NULL	NULL	NULL	NULL	NULL	NULL
Nursing	Male	61	36.49	Lower GI	2020-01-02 06:51:42	2020-01-02 07:37:00	46	2020-01-02 07:28:33	9	2020-01-02 07:48:00	2020-01-02 07:50:55	2	2020-01-02 07:57:00	2020-01-02 08:20:00	59	23	1	0	0	1	0	1	0	0	0	0	0	3	NULL	NULL	NULL	NULL	NULL	NULL	NULL	NULL	NULL	NULL	NULL	NULL	NULL	NULL	NULL	NULL	NULL	NULL	NULL	NULL	NULL
Nursing	Female	74	23.18	Lower GI	2021-05-26 12:50:27	2021-05-26 13:05:00	15	2021-05-26 13:01:39	4	2021-05-26 13:42:00	2021-05-26 16:34:27	172	2021-05-26 13:54:00	2021-05-26 14:45:00	224	51	NULL	NULL	NULL	NULL	NULL	NULL	NULL	NULL	NULL	NULL	NULL	0	NULL	NULL	NULL	NULL	NULL	NULL	NULL	NULL	NULL	NULL	NULL	NULL	NULL	NULL	NULL	NULL	NULL	NULL	NULL	NULL	NULL
Nursing	Female	56	19.77	Upper GI	2020-06-03 09:53:00	2020-06-03 10:34:00	41	2020-06-03 10:16:05	18	2020-06-03 10:53:00	2020-06-03 10:55:43	2	2020-06-03 11:10:00	2020-06-03 12:00:00	62	50	0	0	0	0	0	0	0	1	0	0	0	1	NULL	NULL	NULL	NULL	NULL	NULL	NULL	NULL	NULL	NULL	NULL	NULL	NULL	NULL	NULL	NULL	NULL	NULL	NULL	NULL	NULL
Nursing	Female	56	19.77	Upper GI	2020-07-07 09:16:02	2020-07-07 09:46:00	30	2020-07-07 09:31:13	15	2020-07-07 09:48:00	2020-07-07 09:52:06	4	2020-07-07 09:59:00	2020-07-07 10:45:00	36	46	0	0	0	0	0	0	0	1	0	0	0	1	NULL	NULL	NULL	NULL	NULL	NULL	NULL	NULL	NULL	NULL	NULL	NULL	NULL	NULL	NULL	NULL	NULL	NULL	NULL	NULL	NULL
Nursing	Female	58	22.86	DUAL	2020-08-19 11:12:04	2020-08-19 11:31:00	19	2020-08-19 11:22:00	9	2020-08-19 11:34:00	2020-08-19 11:57:51	23	2020-08-19 12:02:00	2020-08-19 13:41:00	45	99	0	0	0	1	0	0	0	1	0	0	0	2	NULL	NULL	NULL	NULL	NULL	NULL	NULL	NULL	NULL	NULL	NULL	NULL	NULL	NULL	NULL	NULL	NULL	NULL	NULL	NULL	NULL
Nursing	Male	73	26.54	Lower GI	2021-04-16 11:32:02	2021-04-16 12:00:00	28	2021-04-16 11:51:00	9	2021-04-16 12:15:00	2021-04-16 12:21:19	6	2021-04-16 12:25:00	2021-04-16 12:55:00	49	30	0	0	0	1	0	0	0	0	0	0	0	1	NULL	NULL	NULL	NULL	NULL	NULL	NULL	NULL	NULL	NULL	NULL	NULL	NULL	NULL	NULL	NULL	NULL	NULL	NULL	NULL	NULL
Nursing	Female	40	28.89	Lower GI	2020-01-20 13:49:29	2020-01-20 14:12:00	23	2020-01-20 14:05:00	7	2020-01-20 14:33:00	2020-01-20 14:35:00	2	2020-01-20 14:41:00	2020-01-20 15:30:00	46	49	NULL	NULL	NULL	NULL	NULL	NULL	NULL	NULL	NULL	NULL	NULL	0	NULL	NULL	NULL	NULL	NULL	NULL	NULL	NULL	NULL	NULL	NULL	NULL	NULL	NULL	NULL	NULL	NULL	NULL	NULL	NULL	NULL
Nursing	Male	76	30.68	Lower GI	2020-10-16 15:41:18	2020-10-16 15:52:00	11	2020-10-16 15:42:45	10	2020-10-16 16:16:00	2020-10-16 16:19:29	3	2020-10-16 16:29:00	2020-10-16 17:04:00	38	35	1	0	0	0	0	1	1	0	0	1	0	4	NULL	NULL	NULL	NULL	NULL	NULL	NULL	NULL	NULL	NULL	NULL	NULL	NULL	NULL	NULL	NULL	NULL	NULL	NULL	NULL	NULL
Nursing	Female	56	23.46	Lower GI	2021-04-30 16:42:52	2021-04-30 17:53:00	71	2021-04-30 17:45:49	8	2021-04-30 18:13:00	2021-04-30 18:15:30	2	2021-04-30 18:19:00	2021-04-30 19:07:00	93	48	NULL	NULL	NULL	NULL	NULL	NULL	NULL	NULL	NULL	NULL	NULL	0	NULL	NULL	NULL	NULL	NULL	NULL	NULL	NULL	NULL	NULL	NULL	NULL	NULL	NULL	NULL	NULL	NULL	NULL	NULL	NULL	NULL
Nursing	Male	71	21.29	Lower GI	2021-05-04 08:38:33	2021-05-04 08:56:00	18	2021-05-04 08:49:00	7	2021-05-04 09:15:00	2021-05-04 09:18:16	3	2021-05-04 09:24:00	2021-05-04 10:02:00	40	38	NULL	NULL	NULL	NULL	NULL	NULL	NULL	NULL	NULL	NULL	NULL	0	NULL	NULL	NULL	NULL	NULL	NULL	NULL	NULL	NULL	NULL	NULL	NULL	NULL	NULL	NULL	NULL	NULL	NULL	NULL	NULL	NULL
Nursing	Female	55	36.9	Lower GI	2021-02-05 12:02:27	2021-02-05 12:46:00	44	2021-02-05 12:30:49	16	2021-02-05 13:04:00	2021-02-05 13:10:01	6	2021-02-05 13:14:00	2021-02-05 13:42:00	68	28	1	0	0	1	0	1	0	0	0	0	0	3	NULL	NULL	NULL	NULL	NULL	NULL	NULL	NULL	NULL	NULL	NULL	NULL	NULL	NULL	NULL	NULL	NULL	NULL	NULL	NULL	NULL
Nursing	Female	61	28.53	Lower GI	2020-10-29 10:28:00	2020-10-29 11:02:00	34	2020-10-29 10:51:59	11	2020-10-29 11:16:00	2020-10-29 11:19:09	3	2020-10-29 11:24:00	2020-10-29 12:00:00	51	36	NULL	NULL	NULL	NULL	NULL	NULL	NULL	NULL	NULL	NULL	NULL	0	NULL	NULL	NULL	NULL	NULL	NULL	NULL	NULL	NULL	NULL	NULL	NULL	NULL	NULL	NULL	NULL	NULL	NULL	NULL	NULL	NULL
Nursing	Male	41	26.96	Lower GI	2020-03-13 11:47:43	2020-03-13 12:05:00	18	2020-03-12 19:24:00	1001	2020-03-13 12:12:00	2020-03-13 12:16:15	4	2020-03-13 12:22:00	2020-03-13 14:00:00	29	98	NULL	NULL	NULL	NULL	NULL	NULL	NULL	NULL	NULL	NULL	NULL	0	NULL	NULL	NULL	NULL	NULL	NULL	NULL	NULL	NULL	NULL	NULL	NULL	NULL	NULL	NULL	NULL	NULL	NULL	5	mg	NULL
Nursing	Female	50	23.03	Lower GI	2021-04-26 13:39:00	2021-04-26 13:55:00	16	2021-04-26 13:45:00	10	2021-04-26 14:09:00	2021-04-26 14:12:41	3	2021-04-26 14:17:00	2021-04-26 14:45:00	33	28	NULL	NULL	NULL	NULL	NULL	NULL	NULL	NULL	NULL	NULL	NULL	0	NULL	NULL	NULL	NULL	NULL	NULL	NULL	NULL	NULL	NULL	NULL	NULL	NULL	NULL	NULL	NULL	NULL	NULL	NULL	NULL	NULL
Nursing	Female	52	30.21	Lower GI	2020-10-08 12:26:39	2020-10-08 12:44:00	18	2020-10-08 12:37:39	7	2020-10-08 13:07:00	2020-10-08 13:10:35	3	2020-10-08 13:15:00	2020-10-08 14:22:00	44	67	NULL	NULL	NULL	NULL	NULL	NULL	NULL	NULL	NULL	NULL	NULL	0	NULL	NULL	NULL	NULL	NULL	NULL	NULL	NULL	NULL	NULL	NULL	NULL	NULL	NULL	NULL	NULL	NULL	NULL	NULL	NULL	NULL
Nursing	Female	40	26.61	Upper GI	2020-01-07 06:37:26	2020-01-07 07:21:00	44	2020-01-07 07:12:22	9	2020-01-07 07:25:00	2020-01-07 07:26:18	1	2020-01-07 07:31:00	2020-01-07 08:25:00	49	54	0	1	0	1	0	1	1	0	0	1	1	6	NULL	NULL	NULL	NULL	NULL	NULL	3	mg	NULL	NULL	NULL	NULL	NULL	NULL	NULL	NULL	NULL	NULL	NULL	NULL	NULL
Nursing	Male	87	23.39	Lower GI	2020-06-23 08:00:29	2020-06-23 08:34:00	34	2020-06-23 08:30:30	4	2020-06-23 08:59:00	2020-06-23 09:01:00	2	2020-06-23 09:09:00	2020-06-23 09:52:00	61	43	1	0	0	0	0	1	1	0	0	1	0	4	NULL	NULL	NULL	NULL	NULL	NULL	NULL	NULL	NULL	NULL	NULL	NULL	NULL	NULL	NULL	NULL	NULL	NULL	NULL	NULL	NULL
Anesthesia	Male	51	28.17	Upper GI	2021-08-13 13:41:08	2021-08-13 13:54:00	13	2021-08-13 13:47:00	7	2021-08-13 14:01:00	2021-08-13 14:03:14	2	2021-08-13 14:11:00	2021-08-13 14:39:00	22	28	0	0	0	1	0	0	0	1	0	0	0	2	NULL	NULL	NULL	NULL	NULL	NULL	NULL	NULL	NULL	NULL	NULL	NULL	NULL	NULL	NULL	NULL	NULL	NULL	NULL	NULL	NULL
Nursing	Female	54	21.95	Lower GI	2020-07-22 10:26:24	2020-07-22 10:56:00	30	2020-07-22 10:47:43	9	2020-07-22 11:23:00	2020-07-22 11:25:50	2	2020-07-22 11:30:00	2020-07-22 12:28:00	59	58	0	0	0	1	0	1	0	0	0	0	0	2	NULL	NULL	NULL	NULL	NULL	NULL	NULL	NULL	NULL	NULL	NULL	NULL	NULL	NULL	NULL	NULL	NULL	NULL	NULL	NULL	NULL
Nursing	Female	59	17.49	Lower GI	2021-04-26 13:00:00	2021-04-26 13:22:00	22	2021-04-26 13:14:00	8	2021-04-26 13:41:00	2021-04-26 13:46:40	5	2021-04-26 13:54:00	2021-04-26 15:34:00	46	100	NULL	NULL	NULL	NULL	NULL	NULL	NULL	NULL	NULL	NULL	NULL	0	NULL	NULL	NULL	NULL	NULL	NULL	NULL	NULL	NULL	NULL	NULL	NULL	NULL	NULL	NULL	NULL	NULL	NULL	NULL	NULL	NULL
Nursing	Female	30	32.12	Lower GI	2020-11-16 10:56:10	2020-11-16 11:16:00	20	2020-11-16 11:07:56	9	2020-11-16 11:24:00	2020-11-16 11:30:53	6	2020-11-16 11:37:00	2020-11-16 12:30:00	34	53	0	0	0	0	0	0	1	0	0	1	0	2	NULL	NULL	NULL	NULL	NULL	NULL	NULL	NULL	NULL	NULL	NULL	NULL	NULL	NULL	NULL	NULL	NULL	NULL	NULL	NULL	NULL
Nursing	Male	63	25.83	DUAL	2020-07-08 09:29:06	2020-07-08 09:46:00	17	2020-07-08 09:38:41	8	2020-07-08 10:26:00	2020-07-08 10:33:00	7	2020-07-08 10:37:00	2020-07-08 11:15:00	64	38	NULL	NULL	NULL	NULL	NULL	NULL	NULL	NULL	NULL	NULL	NULL	0	NULL	NULL	NULL	NULL	NULL	NULL	NULL	NULL	NULL	NULL	NULL	NULL	NULL	NULL	NULL	NULL	NULL	NULL	NULL	NULL	NULL
Nursing	Male	69	25.5	Lower GI	2021-03-30 09:18:39	2021-03-30 09:32:00	14	2021-03-30 09:26:00	6	2021-03-30 10:05:00	2021-03-30 10:09:24	4	2021-03-30 10:15:00	2021-03-30 10:43:00	51	28	1	0	0	0	0	0	1	0	0	1	0	3	NULL	NULL	NULL	NULL	NULL	NULL	NULL	NULL	NULL	NULL	NULL	NULL	NULL	NULL	NULL	NULL	NULL	NULL	NULL	NULL	NULL
Nursing	Male	57	28.19	Upper GI	2020-01-07 10:03:14	2020-01-07 10:39:00	36	2020-01-07 10:32:51	7	2020-01-07 10:43:00	2020-01-07 11:02:21	19	2020-01-07 10:51:00	2020-01-07 11:33:00	59	42	NULL	NULL	NULL	NULL	NULL	NULL	NULL	NULL	NULL	NULL	NULL	0	NULL	NULL	NULL	NULL	NULL	NULL	NULL	NULL	NULL	NULL	NULL	NULL	NULL	NULL	NULL	NULL	NULL	NULL	NULL	NULL	NULL
Nursing	Female	52	23.44	Lower GI	2021-02-01 06:59:09	2021-02-01 07:13:00	14	2021-02-01 07:04:53	9	2021-02-01 07:27:00	2021-02-01 07:30:39	3	2021-02-01 07:35:00	2021-02-01 08:33:00	31	58	NULL	NULL	NULL	NULL	NULL	NULL	NULL	NULL	NULL	NULL	NULL	0	NULL	NULL	NULL	NULL	NULL	NULL	NULL	NULL	NULL	NULL	NULL	NULL	NULL	NULL	NULL	NULL	NULL	NULL	NULL	NULL	NULL
Nursing	Female	65	19.89	Lower GI	2020-02-27 08:00:53	2020-02-27 08:14:00	14	2020-02-27 08:08:07	6	2020-02-27 08:29:00	2020-02-27 08:35:00	6	2020-02-27 08:41:00	2020-02-27 09:21:00	35	40	NULL	NULL	NULL	NULL	NULL	NULL	NULL	NULL	NULL	NULL	NULL	0	NULL	NULL	NULL	NULL	NULL	NULL	NULL	NULL	NULL	NULL	NULL	NULL	NULL	NULL	NULL	NULL	NULL	NULL	NULL	NULL	NULL
Nursing	Male	60	23.29	Lower GI	2020-10-15 16:30:32	2020-10-15 16:47:00	17	2020-10-15 16:34:28	13	2020-10-15 17:02:00	2020-10-15 17:06:47	4	2020-10-15 17:12:00	2020-10-15 17:38:00	36	26	NULL	NULL	NULL	NULL	NULL	NULL	NULL	NULL	NULL	NULL	NULL	0	NULL	NULL	NULL	NULL	NULL	NULL	NULL	NULL	NULL	NULL	NULL	NULL	NULL	NULL	NULL	NULL	NULL	NULL	NULL	NULL	NULL
Nursing	Female	68	22.31	Lower GI	2021-04-26 10:53:00	2021-04-26 11:11:00	18	2021-04-26 11:00:00	11	2021-04-26 11:25:00	2021-04-26 11:30:03	5	2021-04-26 11:30:00	2021-04-26 12:09:00	37	39	0	0	0	0	0	0	1	0	0	1	0	2	NULL	NULL	NULL	NULL	NULL	NULL	NULL	NULL	NULL	NULL	NULL	NULL	NULL	NULL	NULL	NULL	NULL	NULL	NULL	NULL	NULL
Nursing	Male	40	23.73	Upper GI	2021-02-18 10:19:54	2021-02-18 11:01:00	42	2021-02-18 10:49:00	12	2021-02-18 11:07:00	2021-02-18 11:10:10	3	2021-02-18 11:15:00	2021-02-18 11:42:00	51	27	0	0	0	0	0	0	0	0	0	0	0	0	NULL	NULL	NULL	NULL	NULL	NULL	NULL	NULL	NULL	NULL	NULL	NULL	NULL	NULL	NULL	NULL	NULL	NULL	NULL	NULL	NULL
Nursing	Male	49	28.13	Upper GI	2020-01-02 14:37:04	2020-01-02 15:38:00	61	2020-01-02 15:25:32	13	2020-01-02 15:51:00	2020-01-02 15:55:35	4	2020-01-02 16:00:00	2020-01-02 16:40:00	78	40	NULL	NULL	NULL	NULL	NULL	NULL	NULL	NULL	NULL	NULL	NULL	0	NULL	NULL	NULL	NULL	NULL	NULL	NULL	NULL	NULL	NULL	NULL	NULL	NULL	NULL	NULL	NULL	NULL	NULL	NULL	NULL	NULL
Nursing	Male	55	36.68	Upper GI	2021-02-15 15:06:23	2021-02-15 15:26:00	20	2021-02-15 15:18:08	8	2021-02-15 15:37:00	2021-02-15 15:42:24	5	2021-02-15 15:46:00	2021-02-15 16:40:00	36	54	NULL	NULL	NULL	NULL	NULL	NULL	NULL	NULL	NULL	NULL	NULL	0	NULL	NULL	NULL	NULL	NULL	NULL	NULL	NULL	NULL	NULL	NULL	NULL	NULL	NULL	NULL	NULL	NULL	NULL	NULL	NULL	NULL
Nursing	Male	54	38.86	Upper GI	2020-12-30 07:40:23	2020-12-30 08:02:00	22	2020-12-30 07:43:54	19	2020-12-30 08:05:00	2020-12-30 08:11:00	6	2020-12-30 08:15:00	2020-12-30 09:05:00	31	50	NULL	NULL	NULL	NULL	NULL	NULL	NULL	NULL	NULL	NULL	NULL	0	NULL	NULL	NULL	NULL	NULL	NULL	NULL	NULL	NULL	NULL	NULL	NULL	NULL	NULL	NULL	NULL	NULL	NULL	NULL	NULL	NULL
Nursing	Male	55	36.68	Upper GI	2021-04-21 15:26:10	2021-04-21 15:39:00	13	2021-04-21 15:29:00	10	2021-04-21 15:50:00	2021-04-21 15:55:13	5	2021-04-21 16:00:00	2021-04-21 16:34:00	29	34	NULL	NULL	NULL	NULL	NULL	NULL	NULL	NULL	NULL	NULL	NULL	0	NULL	NULL	NULL	NULL	NULL	NULL	NULL	NULL	NULL	NULL	NULL	NULL	NULL	NULL	NULL	NULL	NULL	NULL	NULL	NULL	NULL
Nursing	Male	55	37.34	Upper GI	2021-06-09 07:59:47	2021-06-09 08:20:00	21	2021-06-09 08:10:23	10	2021-06-09 08:23:00	2021-06-09 08:27:13	4	2021-06-09 08:30:00	2021-06-09 08:54:00	28	24	NULL	NULL	NULL	NULL	NULL	NULL	NULL	NULL	NULL	NULL	NULL	0	NULL	NULL	NULL	NULL	NULL	NULL	NULL	NULL	NULL	NULL	NULL	NULL	NULL	NULL	NULL	NULL	NULL	NULL	NULL	NULL	NULL
Nursing	Female	60	36.22	Lower GI	2020-08-12 09:24:00	2020-08-12 09:47:00	23	2020-08-12 09:41:43	6	2020-08-12 10:09:00	2020-08-12 10:13:15	4	2020-08-12 10:18:00	2020-08-12 10:45:00	49	27	NULL	NULL	NULL	NULL	NULL	NULL	NULL	NULL	NULL	NULL	NULL	0	NULL	NULL	NULL	NULL	NULL	NULL	NULL	NULL	NULL	NULL	NULL	NULL	NULL	NULL	NULL	NULL	NULL	NULL	NULL	NULL	NULL
Nursing	Male	58	25.42	Lower GI	2021-02-18 13:55:51	2021-02-18 14:44:00	49	2021-02-18 14:30:30	14	2021-02-18 15:11:00	2021-02-18 15:15:16	4	2021-02-18 15:22:00	2021-02-18 15:51:00	80	29	0	0	0	1	0	0	1	1	0	1	0	4	NULL	NULL	NULL	NULL	NULL	NULL	NULL	NULL	NULL	NULL	NULL	NULL	NULL	NULL	NULL	NULL	NULL	NULL	NULL	NULL	NULL
Nursing	Female	69	27.45	Lower GI	2021-03-08 07:17:51	2021-03-08 07:43:00	26	2021-03-08 07:35:11	8	2021-03-08 08:02:00	2021-03-08 08:05:06	3	2021-03-08 08:10:00	2021-03-08 08:40:00	48	30	NULL	NULL	NULL	NULL	NULL	NULL	NULL	NULL	NULL	NULL	NULL	0	NULL	NULL	NULL	NULL	NULL	NULL	NULL	NULL	NULL	NULL	NULL	NULL	NULL	NULL	NULL	NULL	NULL	NULL	NULL	NULL	NULL
Nursing	Male	72	21.62	Lower GI	2021-04-14 11:35:30	2021-04-14 12:00:00	25	2021-04-14 11:47:41	13	2021-04-14 12:26:00	2021-04-14 12:28:59	2	2021-04-14 12:30:00	2021-04-14 13:00:00	53	30	0	0	0	1	0	1	0	0	0	0	0	2	NULL	NULL	NULL	NULL	NULL	NULL	NULL	NULL	NULL	NULL	NULL	NULL	NULL	NULL	NULL	NULL	NULL	NULL	NULL	NULL	NULL
Nursing	Female	60	22.05	Upper GI	2020-11-17 07:53:46	2020-11-17 08:27:00	34	2020-11-17 08:19:20	8	2020-11-17 08:33:00	2020-11-17 08:36:32	3	2020-11-17 08:44:00	2020-11-17 09:30:00	43	46	0	0	0	0	0	1	0	0	1	0	0	2	NULL	NULL	NULL	NULL	NULL	NULL	NULL	NULL	NULL	NULL	NULL	NULL	NULL	NULL	NULL	NULL	NULL	NULL	NULL	NULL	NULL
Anesthesia	Female	56	24.21	Upper GI	2021-10-25 13:01:48	2021-10-25 13:07:00	6	2021-10-25 13:02:00	5	2021-10-25 13:33:00	2021-10-25 13:35:09	2	2021-10-25 13:45:00	2021-10-25 14:30:00	34	45	1	0	0	1	0	1	0	0	0	0	0	3	NULL	NULL	NULL	NULL	NULL	NULL	NULL	NULL	NULL	NULL	NULL	NULL	NULL	NULL	NULL	NULL	NULL	NULL	NULL	NULL	NULL
Anesthesia	Male	55	24.02	Lower GI	2021-10-25 10:17:47	2021-10-25 10:31:00	14	2021-10-25 10:27:00	4	2021-10-25 10:52:00	2021-10-25 11:10:36	18	2021-10-25 10:58:00	2021-10-25 11:27:00	53	29	NULL	NULL	NULL	NULL	NULL	NULL	NULL	NULL	NULL	NULL	NULL	0	NULL	NULL	NULL	NULL	NULL	NULL	NULL	NULL	NULL	NULL	NULL	NULL	NULL	NULL	NULL	NULL	NULL	NULL	NULL	NULL	NULL
Anesthesia	Female	62	24.21	DUAL	2021-09-30 11:05:00	2021-09-30 11:19:00	14	2021-09-30 11:06:00	13	2021-09-30 11:53:00	2021-09-30 11:58:00	5	2021-09-30 12:00:00	2021-09-30 13:06:00	53	66	0	0	0	0	0	0	1	1	0	1	0	3	NULL	NULL	NULL	NULL	NULL	NULL	NULL	NULL	NULL	NULL	NULL	NULL	NULL	NULL	NULL	NULL	NULL	NULL	NULL	NULL	NULL
Anesthesia	Female	59	30.27	Lower GI	2021-08-16 14:21:53	2021-08-16 14:26:00	5	2021-08-16 14:19:00	7	2021-08-16 14:53:00	2021-08-16 14:55:18	2	2021-08-16 15:00:00	2021-08-16 15:52:00	34	52	0	0	0	0	0	1	0	0	0	0	0	1	NULL	NULL	NULL	NULL	NULL	NULL	NULL	NULL	NULL	NULL	NULL	NULL	NULL	NULL	NULL	NULL	NULL	NULL	NULL	NULL	NULL
Nursing	Female	64	26.52	Lower GI	2021-01-19 09:35:31	2021-01-19 09:59:00	24	2021-01-19 09:52:00	7	2021-01-19 10:19:00	2021-01-19 10:20:56	1	2021-01-19 10:28:00	2021-01-19 10:55:00	45	27	0	0	0	0	0	0	0	0	0	0	0	0	NULL	NULL	NULL	NULL	NULL	NULL	NULL	NULL	NULL	NULL	NULL	NULL	NULL	NULL	NULL	NULL	NULL	NULL	NULL	NULL	NULL
Nursing	Male	66	34.58	Lower GI	2020-07-14 10:01:14	2020-07-14 10:53:00	52	2020-07-14 10:45:43	8	2020-07-14 11:43:00	2020-07-14 11:47:15	4	2020-07-14 11:50:00	2020-07-14 12:22:00	106	32	1	0	1	0	0	1	0	0	0	0	0	3	NULL	NULL	NULL	NULL	NULL	NULL	NULL	NULL	NULL	NULL	NULL	NULL	NULL	NULL	NULL	NULL	NULL	NULL	NULL	NULL	NULL
Anesthesia	Male	71	34.67	Lower GI	2021-09-02 10:53:00	2021-09-02 11:01:00	8	2021-09-02 10:52:00	9	2021-09-02 11:26:00	2021-09-02 11:32:07	6	2021-09-02 11:30:00	2021-09-02 12:13:00	39	43	1	0	0	1	0	1	0	0	0	0	0	3	NULL	NULL	NULL	NULL	NULL	NULL	NULL	NULL	NULL	NULL	NULL	NULL	NULL	NULL	NULL	NULL	NULL	NULL	NULL	NULL	NULL
Nursing	Female	64	23.78	Lower GI	2021-05-10 12:40:03	2021-05-10 13:08:00	28	2021-05-10 12:56:14	12	2021-05-10 13:37:00	2021-05-10 13:39:37	2	2021-05-10 13:45:00	2021-05-10 13:53:00	59	8	NULL	NULL	NULL	NULL	NULL	NULL	NULL	NULL	NULL	NULL	NULL	0	NULL	NULL	NULL	NULL	NULL	NULL	NULL	NULL	NULL	NULL	NULL	NULL	NULL	NULL	NULL	NULL	NULL	NULL	NULL	NULL	NULL
Nursing	Male	60	27.6	Lower GI	2021-02-23 08:33:54	2021-02-23 09:30:00	57	2021-02-23 09:25:00	5	2021-02-23 09:50:00	2021-02-23 09:54:05	4	2021-02-23 09:58:00	2021-02-23 10:25:00	81	27	0	0	0	0	0	1	0	1	0	0	0	2	NULL	NULL	NULL	NULL	NULL	NULL	NULL	NULL	NULL	NULL	NULL	NULL	NULL	NULL	NULL	NULL	NULL	NULL	NULL	NULL	NULL
Nursing	Female	62	24.21	Lower GI	2020-02-25 14:07:37	2020-02-25 14:33:00	26	2020-02-25 14:24:56	9	2020-02-25 14:57:00	2020-02-25 15:00:34	3	2020-02-25 15:00:00	2020-02-25 15:30:00	53	30	NULL	NULL	NULL	NULL	NULL	NULL	NULL	NULL	NULL	NULL	NULL	0	NULL	NULL	NULL	NULL	NULL	NULL	NULL	NULL	NULL	NULL	NULL	NULL	NULL	NULL	NULL	NULL	NULL	NULL	NULL	NULL	NULL
Nursing	Female	71	34.95	Lower GI	2020-06-02 10:51:52	2020-06-02 11:55:00	64	2020-06-02 11:43:58	12	2020-06-02 12:20:00	2020-06-02 12:23:17	3	2020-06-02 12:30:00	2020-06-02 13:02:00	92	32	0	1	0	1	0	1	0	0	0	0	0	3	NULL	NULL	NULL	NULL	NULL	NULL	NULL	NULL	NULL	NULL	NULL	NULL	NULL	NULL	NULL	NULL	NULL	NULL	NULL	NULL	NULL
Nursing	Female	73	26.94	DUAL	2021-02-22 11:17:30	2021-02-22 11:33:00	16	2021-02-22 11:24:40	9	2021-02-22 12:30:00	2021-02-22 12:34:16	4	2021-02-22 12:41:00	2021-02-22 12:49:00	77	8	0	0	0	1	0	0	0	0	0	0	0	1	NULL	NULL	NULL	NULL	NULL	NULL	NULL	NULL	NULL	NULL	NULL	NULL	NULL	NULL	NULL	NULL	NULL	NULL	NULL	NULL	NULL
Nursing	Female	70	36.44	Lower GI	2020-07-20 08:01:53	2020-07-20 08:22:00	21	2020-07-20 08:15:53	7	2020-07-20 09:16:00	2020-07-20 09:22:03	6	2020-07-20 09:27:00	2020-07-20 10:38:00	81	71	1	1	0	0	0	0	0	0	0	0	0	2	NULL	NULL	NULL	NULL	NULL	NULL	NULL	NULL	NULL	NULL	NULL	NULL	NULL	NULL	NULL	NULL	NULL	NULL	NULL	NULL	NULL
Nursing	Female	44	19.97	Lower GI	2020-07-14 08:08:57	2020-07-14 08:36:00	28	2020-07-14 08:29:27	7	2020-07-14 09:39:00	2020-07-14 09:42:27	3	2020-07-14 09:47:00	2020-07-14 10:10:00	94	23	NULL	NULL	NULL	NULL	NULL	NULL	NULL	NULL	NULL	NULL	NULL	0	NULL	NULL	NULL	NULL	NULL	NULL	NULL	NULL	NULL	NULL	NULL	NULL	NULL	NULL	NULL	NULL	NULL	NULL	NULL	NULL	NULL
Nursing	Male	63	25.09	Lower GI	2021-05-05 10:51:57	2021-05-05 11:36:00	45	2021-05-05 11:31:22	5	2021-05-05 11:50:00	2021-05-05 11:54:13	4	2021-05-05 12:00:00	2021-05-05 12:40:00	63	40	0	0	0	0	0	1	0	1	0	0	0	2	NULL	NULL	NULL	NULL	NULL	NULL	NULL	NULL	NULL	NULL	NULL	NULL	NULL	NULL	NULL	NULL	NULL	NULL	NULL	NULL	NULL
Nursing	Female	66	21.95	Upper GI	2021-01-14 11:17:36	2021-01-14 12:02:00	45	2021-01-14 11:53:30	9	2021-01-14 12:12:00	2021-01-14 12:16:21	4	2021-01-14 12:22:00	2021-01-14 13:08:00	59	46	0	0	0	0	0	1	0	0	0	0	0	1	NULL	NULL	NULL	NULL	NULL	NULL	NULL	NULL	NULL	NULL	NULL	NULL	NULL	NULL	NULL	NULL	NULL	NULL	NULL	NULL	NULL
Nursing	Male	71	24.39	Lower GI	2020-01-13 10:14:57	2020-01-13 10:53:00	39	2020-01-13 10:46:51	7	2020-01-13 11:11:00	2020-01-13 11:14:59	3	2020-01-13 11:22:00	2020-01-13 12:14:00	60	52	0	1	0	0	0	1	1	0	0	1	0	4	NULL	NULL	NULL	NULL	NULL	NULL	NULL	NULL	NULL	NULL	NULL	NULL	NULL	NULL	NULL	NULL	NULL	NULL	NULL	NULL	NULL
Anesthesia	Female	64	24.04	Lower GI	2021-09-27 16:13:02	2021-09-27 16:19:00	6	2021-09-27 16:11:00	8	2021-09-27 16:27:00	2021-09-27 16:29:45	2	2021-09-27 16:35:00	2021-09-27 17:07:00	16	32	NULL	NULL	NULL	NULL	NULL	NULL	NULL	NULL	NULL	NULL	NULL	0	NULL	NULL	NULL	NULL	NULL	NULL	NULL	NULL	NULL	NULL	NULL	NULL	NULL	NULL	NULL	NULL	NULL	NULL	NULL	NULL	NULL
Anesthesia	Female	66	24.87	Lower GI	2021-09-01 09:16:00	2021-09-01 09:21:00	5	2021-09-01 09:17:00	4	2021-09-01 09:35:00	2021-09-01 09:38:00	3	2021-09-01 09:40:00	2021-09-01 10:25:00	22	45	0	0	0	0	0	1	0	0	0	0	0	1	NULL	NULL	NULL	NULL	NULL	NULL	NULL	NULL	NULL	NULL	NULL	NULL	NULL	NULL	NULL	NULL	NULL	NULL	NULL	NULL	NULL
Nursing	Male	77	23.73	Lower GI	2020-02-06 07:08:42	2020-02-06 07:56:00	48	2020-02-06 07:48:00	8	2020-02-06 08:46:00	2020-02-06 08:59:39	13	2020-02-06 08:56:00	2020-02-06 09:43:00	111	47	NULL	NULL	NULL	NULL	NULL	NULL	NULL	NULL	NULL	NULL	NULL	0	NULL	NULL	NULL	NULL	NULL	NULL	NULL	NULL	NULL	NULL	NULL	NULL	NULL	NULL	NULL	NULL	NULL	NULL	NULL	NULL	NULL
Nursing	Female	71	22.81	Upper GI	2020-01-27 09:33:14	2020-01-27 09:56:00	23	2020-01-27 09:48:02	8	2020-01-27 10:03:00	2020-01-27 10:06:35	3	2020-01-27 10:10:00	2020-01-27 11:13:00	33	63	0	1	0	0	0	0	0	1	0	0	0	2	NULL	NULL	NULL	NULL	NULL	NULL	NULL	NULL	NULL	NULL	NULL	NULL	NULL	NULL	NULL	NULL	NULL	NULL	NULL	NULL	NULL
Nursing	Female	64	22.6	Lower GI	2020-08-26 12:28:00	2020-08-26 13:28:00	60	2020-08-26 13:17:37	11	2020-08-26 13:46:00	2020-08-26 13:49:19	3	2020-08-26 13:55:00	2020-08-26 14:32:00	81	37	0	0	0	0	0	0	0	1	0	0	0	1	NULL	NULL	NULL	NULL	NULL	NULL	NULL	NULL	NULL	NULL	NULL	NULL	NULL	NULL	NULL	NULL	NULL	NULL	NULL	NULL	NULL
Nursing	Male	64	23.06	Upper GI	2020-10-16 09:59:36	2020-10-16 10:20:00	21	2020-10-16 10:08:00	12	2020-10-16 10:30:00	2020-10-16 10:36:00	6	2020-10-16 10:40:00	2020-10-16 11:32:00	37	52	1	1	0	0	0	0	0	0	0	0	0	2	NULL	NULL	NULL	NULL	NULL	NULL	NULL	NULL	NULL	NULL	NULL	NULL	NULL	NULL	NULL	NULL	NULL	NULL	NULL	NULL	NULL
Nursing	Female	83	18.29	DUAL	2020-06-18 10:09:06	2020-06-18 10:30:00	21	2020-06-18 10:21:00	9	2020-06-18 11:02:00	2020-06-18 11:04:47	2	2020-06-18 11:10:00	2020-06-18 11:23:00	55	13	NULL	NULL	NULL	NULL	NULL	NULL	NULL	NULL	NULL	NULL	NULL	0	NULL	NULL	NULL	NULL	NULL	NULL	NULL	NULL	NULL	NULL	NULL	NULL	NULL	NULL	NULL	NULL	NULL	NULL	NULL	NULL	NULL
Nursing	Male	57	31.52	Lower GI	2020-06-25 09:47:47	2020-06-25 10:10:00	23	2020-06-25 10:00:05	10	2020-06-25 10:31:00	2020-06-25 10:38:24	7	2020-06-25 10:43:00	2020-06-25 11:00:00	51	17	1	0	0	0	0	1	0	0	0	0	0	2	NULL	NULL	NULL	NULL	NULL	NULL	NULL	NULL	NULL	NULL	NULL	NULL	NULL	NULL	NULL	NULL	NULL	NULL	NULL	NULL	NULL
Anesthesia	Male	85	27.72	Lower GI	2021-10-04 11:47:25	2021-10-04 11:54:00	7	2021-10-04 11:46:00	8	2021-10-04 12:09:00	2021-10-04 12:10:17	1	2021-10-04 12:16:00	2021-10-04 12:51:00	23	35	0	0	0	0	0	1	0	0	0	0	0	1	NULL	NULL	NULL	NULL	NULL	NULL	NULL	NULL	NULL	NULL	NULL	NULL	NULL	NULL	NULL	NULL	NULL	NULL	NULL	NULL	NULL
Anesthesia	Female	61	21.87	Lower GI	2021-10-06 14:43:00	2021-10-06 14:53:00	10	2021-10-06 14:41:00	12	2021-10-06 15:22:00	2021-10-06 15:27:22	5	2021-10-06 15:00:00	2021-10-06 16:34:00	44	94	NULL	NULL	NULL	NULL	NULL	NULL	NULL	NULL	NULL	NULL	NULL	0	NULL	NULL	NULL	NULL	NULL	NULL	NULL	NULL	NULL	NULL	NULL	NULL	NULL	NULL	NULL	NULL	NULL	NULL	NULL	NULL	NULL
Anesthesia	Male	61	27.57	DUAL	2021-09-29 07:55:15	2021-09-29 08:08:00	13	2021-09-29 07:46:00	22	2021-09-29 08:43:00	2021-09-29 08:49:43	6	2021-09-29 08:54:00	2021-09-29 09:16:00	54	22	1	1	0	1	0	1	0	0	0	0	0	4	NULL	NULL	NULL	NULL	NULL	NULL	NULL	NULL	NULL	NULL	NULL	NULL	NULL	NULL	NULL	NULL	NULL	NULL	NULL	NULL	NULL
Nursing	Female	80	26.26	Lower GI	2021-04-21 07:29:32	2021-04-21 07:44:00	15	2021-04-21 07:36:53	8	2021-04-21 07:53:00	2021-04-21 07:59:54	6	2021-04-21 08:05:00	2021-04-21 09:01:00	30	56	0	0	0	1	0	1	0	0	0	0	0	2	NULL	NULL	NULL	NULL	NULL	NULL	NULL	NULL	NULL	NULL	NULL	NULL	NULL	NULL	NULL	NULL	NULL	NULL	NULL	NULL	NULL
Nursing	Female	63	16.9	Lower GI	2020-01-23 06:46:15	2020-01-23 07:37:00	51	2020-01-23 07:29:24	8	2020-01-23 08:12:00	2020-01-23 08:14:34	2	2020-01-23 08:20:00	2020-01-23 09:14:00	88	54	NULL	NULL	NULL	NULL	NULL	NULL	NULL	NULL	NULL	NULL	NULL	0	NULL	NULL	NULL	NULL	NULL	NULL	NULL	NULL	NULL	NULL	NULL	NULL	NULL	NULL	NULL	NULL	NULL	NULL	NULL	NULL	NULL
Anesthesia	Female	56	37.76	Upper GI	2021-09-13 15:05:05	2021-09-13 15:09:00	4	2021-09-13 15:03:00	6	2021-09-13 15:19:00	2021-09-13 15:22:11	3	2021-09-13 15:20:00	2021-09-13 16:09:00	17	49	0	1	0	1	0	0	0	0	0	0	0	2	NULL	NULL	NULL	NULL	NULL	NULL	NULL	NULL	NULL	NULL	NULL	NULL	NULL	NULL	NULL	NULL	NULL	NULL	NULL	NULL	NULL
Anesthesia	Female	49	37.44	Upper GI	2021-10-07 07:36:42	2021-10-07 07:45:00	9	2021-10-07 07:34:00	11	2021-10-07 07:51:00	2021-10-07 07:53:40	2	2021-10-07 08:00:00	2021-10-07 08:30:00	17	30	NULL	NULL	NULL	NULL	NULL	NULL	NULL	NULL	NULL	NULL	NULL	0	NULL	NULL	NULL	NULL	NULL	NULL	NULL	NULL	NULL	NULL	NULL	NULL	NULL	NULL	NULL	NULL	NULL	NULL	NULL	NULL	NULL
Nursing	Female	71	30.9	Lower GI	2020-02-18 07:35:33	2020-02-18 07:57:00	22	2020-02-18 07:45:25	12	2020-02-18 08:29:00	2020-02-18 08:30:00	1	2020-02-18 08:40:00	2020-02-18 09:55:00	55	75	0	0	0	1	0	1	0	0	0	0	0	2	NULL	NULL	NULL	NULL	NULL	NULL	NULL	NULL	NULL	NULL	NULL	NULL	NULL	NULL	NULL	NULL	NULL	NULL	NULL	NULL	NULL
Nursing	Female	68	21.27	Upper GI	2020-03-09 14:33:48	2020-03-09 15:01:00	28	2020-03-09 14:48:00	13	2020-03-09 15:17:00	2020-03-09 15:22:09	5	2020-03-09 15:28:00	2020-03-09 16:00:00	49	32	1	0	0	1	0	0	0	0	0	0	0	2	NULL	NULL	NULL	NULL	NULL	NULL	NULL	NULL	NULL	NULL	NULL	NULL	NULL	NULL	NULL	NULL	NULL	NULL	NULL	NULL	NULL
Nursing	Female	46	37.89	Upper GI	2020-11-08 15:38:30	2020-11-08 15:56:00	18	2020-11-07 08:11:00	1905	2020-11-08 16:16:00	2020-11-08 16:37:52	21	2020-11-08 16:21:00	2020-11-08 16:35:00	59	14	NULL	NULL	NULL	NULL	NULL	NULL	NULL	NULL	NULL	NULL	NULL	0	NULL	NULL	NULL	NULL	NULL	NULL	NULL	NULL	NULL	NULL	NULL	NULL	NULL	NULL	NULL	NULL	NULL	NULL	NULL	NULL	NULL
Anesthesia	Female	51	25.58	Lower GI	2021-10-22 13:44:14	2021-10-22 13:54:00	10	2021-10-22 13:49:00	5	2021-10-22 14:05:00	2021-10-22 14:08:46	3	2021-10-22 14:14:00	2021-10-22 14:30:00	24	16	NULL	NULL	NULL	NULL	NULL	NULL	NULL	NULL	NULL	NULL	NULL	0	NULL	NULL	NULL	NULL	NULL	NULL	NULL	NULL	NULL	NULL	NULL	NULL	NULL	NULL	NULL	NULL	NULL	NULL	NULL	NULL	NULL
Nursing	Female	60	24.3	Lower GI	2021-05-03 16:11:10	2021-05-03 16:36:00	25	2021-05-03 16:30:01	6	2021-05-03 17:03:00	2021-05-03 17:07:28	4	2021-05-03 17:10:00	2021-05-03 18:00:00	56	50	NULL	NULL	NULL	NULL	NULL	NULL	NULL	NULL	NULL	NULL	NULL	0	NULL	NULL	NULL	NULL	NULL	NULL	NULL	NULL	NULL	NULL	NULL	NULL	NULL	NULL	NULL	NULL	NULL	NULL	NULL	NULL	NULL
Nursing	Female	58	28.96	Lower GI	2020-06-08 14:09:30	2020-06-08 14:31:00	22	2020-06-08 14:19:58	12	2020-06-08 14:46:00	2020-06-08 14:50:11	4	2020-06-08 14:54:00	2020-06-08 16:00:00	41	66	1	0	0	0	0	0	0	0	0	0	0	1	NULL	NULL	NULL	NULL	NULL	NULL	NULL	NULL	NULL	NULL	NULL	NULL	NULL	NULL	NULL	NULL	NULL	NULL	NULL	NULL	NULL
Nursing	Female	59	21.47	Lower GI	2021-04-20 12:33:18	2021-04-20 13:27:00	54	2021-04-20 13:22:17	5	2021-04-20 13:33:00	2021-04-20 13:36:27	3	2021-04-20 13:45:00	2021-04-20 14:37:00	63	52	1	0	0	0	0	0	0	0	0	0	0	1	NULL	NULL	NULL	NULL	NULL	NULL	NULL	NULL	NULL	NULL	NULL	NULL	NULL	NULL	NULL	NULL	NULL	NULL	NULL	NULL	NULL
Nursing	Female	30	33.63	DUAL	2021-03-04 16:00:23	2021-03-04 16:19:00	19	2021-03-04 16:10:02	9	2021-03-04 16:47:00	2021-03-04 16:52:57	5	2021-03-04 16:56:00	2021-03-04 17:51:00	52	55	0	0	0	1	0	1	0	0	0	0	0	2	NULL	NULL	NULL	NULL	NULL	NULL	NULL	NULL	NULL	NULL	NULL	NULL	NULL	NULL	NULL	NULL	NULL	NULL	NULL	NULL	NULL
Nursing	Male	59	32.08	Upper GI	2021-02-24 16:54:39	2021-02-24 17:30:00	36	2021-02-24 17:19:16	11	2021-02-24 17:38:00	2021-02-24 17:41:58	3	2021-02-24 17:46:00	2021-02-24 18:13:00	47	27	1	0	0	0	0	1	1	0	0	1	0	4	NULL	NULL	NULL	NULL	NULL	NULL	NULL	NULL	NULL	NULL	NULL	NULL	NULL	NULL	NULL	NULL	NULL	NULL	NULL	NULL	NULL
Nursing	Male	62	24.41	Lower GI	2021-04-08 10:18:20	2021-04-08 10:36:00	18	2021-04-08 10:27:00	9	2021-04-08 10:57:00	2021-04-08 12:52:44	115	2021-04-08 11:04:00	2021-04-08 11:41:00	154	37	0	0	0	1	0	1	1	0	0	1	0	4	NULL	NULL	NULL	NULL	NULL	NULL	NULL	NULL	NULL	NULL	NULL	NULL	NULL	NULL	NULL	NULL	NULL	NULL	NULL	NULL	NULL
Nursing	Female	63	22.25	Lower GI	2020-08-01 13:32:26	2020-08-01 14:09:00	37	2020-07-31 21:24:00	1005	2020-08-01 14:24:00	2020-08-01 14:41:10	17	2020-08-01 14:25:00	2020-08-01 14:38:00	69	13	0	1	0	1	0	1	1	0	0	1	1	6	NULL	NULL	NULL	NULL	NULL	NULL	NULL	NULL	1	mg	NULL	NULL	NULL	NULL	NULL	NULL	NULL	NULL	NULL	NULL	NULL
Nursing	Male	64	30.13	Lower GI	2021-05-26 08:43:55	2021-05-26 09:07:00	24	2021-05-26 08:57:49	10	2021-05-26 09:26:00	2021-05-26 09:29:42	3	2021-05-26 09:34:00	2021-05-26 09:45:00	46	11	0	0	0	0	0	1	1	0	0	1	0	3	NULL	NULL	NULL	NULL	NULL	NULL	NULL	NULL	NULL	NULL	NULL	NULL	NULL	NULL	NULL	NULL	NULL	NULL	NULL	NULL	NULL
Anesthesia	Female	59	21.46	Upper GI	2021-08-18 15:39:57	2021-08-18 16:18:00	39	2021-08-18 16:10:00	8	2021-08-18 16:40:00	2021-08-18 16:43:34	3	2021-08-18 16:52:00	2021-08-18 17:25:00	64	33	0	1	0	0	0	0	0	0	0	0	0	1	NULL	NULL	NULL	NULL	NULL	NULL	NULL	NULL	NULL	NULL	NULL	NULL	NULL	NULL	NULL	NULL	NULL	NULL	NULL	NULL	NULL
Anesthesia	Male	74	24.33	Lower GI	2021-10-08 13:40:12	2021-10-08 13:46:00	6	2021-10-08 13:39:00	7	2021-10-08 14:08:00	2021-10-08 14:17:59	9	2021-10-08 14:14:00	2021-10-08 14:45:00	37	31	0	0	0	1	0	1	0	0	0	0	0	2	NULL	NULL	NULL	NULL	NULL	NULL	NULL	NULL	NULL	NULL	NULL	NULL	NULL	NULL	NULL	NULL	NULL	NULL	NULL	NULL	NULL
Nursing	Female	56	20.25	Lower GI	2020-09-15 10:00:00	2020-09-15 10:24:00	24	2020-09-15 10:17:00	7	2020-09-15 10:51:00	2020-09-15 10:53:57	2	2020-09-15 10:59:00	2020-09-15 12:00:00	53	61	NULL	NULL	NULL	NULL	NULL	NULL	NULL	NULL	NULL	NULL	NULL	0	NULL	NULL	NULL	NULL	NULL	NULL	NULL	NULL	NULL	NULL	NULL	NULL	NULL	NULL	NULL	NULL	NULL	NULL	NULL	NULL	NULL
Nursing	Female	57	26.94	Upper GI	2020-05-28 16:10:10	2020-05-28 16:22:00	12	2020-05-28 16:17:00	5	2020-05-28 16:33:00	2020-05-28 16:36:33	3	2020-05-28 16:45:00	2020-05-28 17:50:00	26	65	NULL	NULL	NULL	NULL	NULL	NULL	NULL	NULL	NULL	NULL	NULL	0	NULL	NULL	NULL	NULL	NULL	NULL	NULL	NULL	NULL	NULL	NULL	NULL	NULL	NULL	NULL	NULL	NULL	NULL	NULL	NULL	NULL
Nursing	Female	29	25.09	Lower GI	2021-02-17 07:31:14	2021-02-17 08:11:00	40	2021-02-17 08:01:00	10	2021-02-17 08:27:00	2021-02-17 08:30:02	3	2021-02-17 08:36:00	2021-02-17 09:16:00	59	40	NULL	NULL	NULL	NULL	NULL	NULL	NULL	NULL	NULL	NULL	NULL	0	NULL	NULL	NULL	NULL	NULL	NULL	NULL	NULL	NULL	NULL	NULL	NULL	NULL	NULL	NULL	NULL	NULL	NULL	NULL	NULL	NULL
Nursing	Female	49	31.18	Lower GI	2021-01-25 08:00:28	2021-01-25 08:18:00	18	2021-01-25 08:05:00	13	2021-01-25 08:36:00	2021-01-25 08:40:00	4	2021-01-25 08:42:00	2021-01-25 09:38:00	40	56	NULL	NULL	NULL	NULL	NULL	NULL	NULL	NULL	NULL	NULL	NULL	0	NULL	NULL	NULL	NULL	NULL	NULL	NULL	NULL	NULL	NULL	NULL	NULL	NULL	NULL	NULL	NULL	NULL	NULL	NULL	NULL	NULL
Nursing	Female	64	32.1	Upper GI	2020-08-18 14:03:35	2020-08-18 14:22:00	19	2020-08-18 14:14:29	8	2020-08-18 14:25:00	2020-08-18 14:31:44	6	2020-08-18 14:39:00	2020-08-18 14:56:00	28	17	NULL	NULL	NULL	NULL	NULL	NULL	NULL	NULL	NULL	NULL	NULL	0	NULL	NULL	NULL	NULL	NULL	NULL	NULL	NULL	NULL	NULL	NULL	NULL	NULL	NULL	NULL	NULL	NULL	NULL	NULL	NULL	NULL
Anesthesia	Male	57	27.12	Lower GI	2021-08-10 07:27:34	2021-08-10 07:40:00	13	2021-08-10 07:35:00	5	2021-08-10 08:05:00	2021-08-10 08:10:10	5	2021-08-10 08:15:00	2021-08-10 08:30:00	43	15	NULL	NULL	NULL	NULL	NULL	NULL	NULL	NULL	NULL	NULL	NULL	0	NULL	NULL	NULL	NULL	NULL	NULL	NULL	NULL	NULL	NULL	NULL	NULL	NULL	NULL	NULL	NULL	NULL	NULL	NULL	NULL	NULL
Anesthesia	Male	58	21.6	Lower GI	2021-09-12 12:50:00	2021-09-12 13:17:00	27	2021-09-11 05:34:00	1903	2021-09-12 13:29:00	2021-09-12 14:00:00	31	2021-09-12 13:40:00	2021-09-12 14:00:00	70	20	0	0	0	0	0	1	0	0	0	0	0	1	NULL	NULL	NULL	NULL	NULL	NULL	NULL	NULL	NULL	NULL	NULL	NULL	NULL	NULL	NULL	NULL	NULL	NULL	NULL	NULL	NULL
Nursing	Female	61	26.29	Lower GI	2020-09-28 13:24:55	2020-09-28 13:35:00	11	2020-09-28 13:28:00	7	2020-09-28 13:59:00	2020-09-28 14:01:24	2	2020-09-28 14:06:00	2020-09-28 14:57:00	37	51	0	1	0	0	0	0	0	0	0	0	0	1	NULL	NULL	NULL	NULL	NULL	NULL	NULL	NULL	NULL	NULL	NULL	NULL	NULL	NULL	NULL	NULL	NULL	NULL	NULL	NULL	NULL
Anesthesia	Female	63	25.35	Lower GI	2021-09-20 08:46:44	2021-09-20 08:52:00	6	2021-09-20 08:47:00	5	2021-09-20 09:17:00	2021-09-20 09:20:26	3	2021-09-20 09:23:00	2021-09-20 09:45:00	34	22	1	1	0	1	0	0	0	0	0	0	0	3	NULL	NULL	NULL	NULL	NULL	NULL	NULL	NULL	NULL	NULL	NULL	NULL	NULL	NULL	NULL	NULL	NULL	NULL	NULL	NULL	NULL
Nursing	Male	51	33.91	Upper GI	2020-09-14 14:24:24	2020-09-14 15:08:00	44	2020-09-14 14:58:25	10	2020-09-14 15:17:00	2020-09-14 15:20:35	3	2020-09-14 15:26:00	2020-09-14 16:23:00	56	57	0	0	0	0	0	1	1	1	0	1	0	4	NULL	NULL	NULL	NULL	NULL	NULL	NULL	NULL	NULL	NULL	NULL	NULL	NULL	NULL	NULL	NULL	NULL	NULL	NULL	NULL	NULL
Anesthesia	Female	61	20.63	Lower GI	2021-09-09 16:46:26	2021-09-09 16:53:00	7	2021-09-09 16:46:00	7	2021-09-09 17:07:00	2021-09-09 17:08:20	1	2021-09-09 17:12:00	2021-09-09 17:40:00	22	28	NULL	NULL	NULL	NULL	NULL	NULL	NULL	NULL	NULL	NULL	NULL	0	NULL	NULL	NULL	NULL	NULL	NULL	NULL	NULL	NULL	NULL	NULL	NULL	NULL	NULL	NULL	NULL	NULL	NULL	NULL	NULL	NULL
Nursing	Female	54	29.83	DUAL	2020-06-09 14:53:53	2020-06-09 15:15:00	22	2020-06-09 15:08:27	7	2020-06-09 15:43:00	2020-06-09 15:50:00	7	2020-06-09 16:14:00	2020-06-09 16:44:00	57	30	1	1	0	1	0	1	1	0	0	1	0	6	NULL	NULL	NULL	NULL	NULL	NULL	NULL	NULL	NULL	NULL	NULL	NULL	NULL	NULL	NULL	NULL	NULL	NULL	NULL	NULL	NULL
Anesthesia	Male	58	31.24	Lower GI	2021-08-31 08:42:14	2021-08-31 08:48:00	6	2021-08-31 08:42:00	6	2021-08-31 09:08:00	2021-08-31 09:13:42	5	2021-08-31 09:14:00	2021-08-31 09:41:00	31	27	1	0	0	1	0	1	0	0	0	0	0	3	NULL	NULL	NULL	NULL	NULL	NULL	NULL	NULL	NULL	NULL	NULL	NULL	NULL	NULL	NULL	NULL	NULL	NULL	NULL	NULL	NULL
Nursing	Male	68	24.41	Lower GI	2020-05-01 10:10:49	2020-05-01 10:24:00	14	2020-05-01 10:16:41	8	2020-05-01 10:43:00	2020-05-01 10:49:43	6	2020-05-01 10:55:00	2020-05-01 11:50:00	39	55	NULL	NULL	NULL	NULL	NULL	NULL	NULL	NULL	NULL	NULL	NULL	0	4	mg	NULL	NULL	NULL	NULL	NULL	NULL	NULL	NULL	NULL	NULL	NULL	NULL	NULL	NULL	NULL	NULL	NULL	NULL	NULL
Nursing	Female	60	24.46	Lower GI	2020-09-18 12:33:44	2020-09-18 12:47:00	14	2020-09-18 12:38:00	9	2020-09-18 13:01:00	2020-09-18 13:05:16	4	2020-09-18 13:09:00	2020-09-18 14:09:00	32	60	NULL	NULL	NULL	NULL	NULL	NULL	NULL	NULL	NULL	NULL	NULL	0	NULL	NULL	NULL	NULL	NULL	NULL	NULL	NULL	NULL	NULL	NULL	NULL	NULL	NULL	NULL	NULL	NULL	NULL	NULL	NULL	NULL
Nursing	Female	53	37.2	Upper GI	2020-11-09 15:24:32	2020-11-09 15:43:00	19	2020-11-09 15:30:00	13	2020-11-09 15:51:00	2020-11-09 16:00:00	9	2020-11-09 16:04:00	2020-11-09 16:57:00	36	53	0	0	0	0	0	1	0	0	0	0	0	1	NULL	NULL	NULL	NULL	NULL	NULL	NULL	NULL	NULL	NULL	NULL	NULL	NULL	NULL	NULL	NULL	NULL	NULL	NULL	NULL	NULL
Nursing	Female	73	25.61	Lower GI	2021-04-29 07:01:02	2021-04-29 07:17:00	16	2021-04-29 07:08:34	9	2021-04-29 07:40:00	2021-04-29 07:42:19	2	2021-04-29 07:49:00	2021-04-29 08:24:00	41	35	0	1	0	1	0	0	0	0	0	0	0	2	NULL	NULL	NULL	NULL	NULL	NULL	NULL	NULL	NULL	NULL	NULL	NULL	NULL	NULL	NULL	NULL	NULL	NULL	NULL	NULL	NULL
Nursing	Female	60	17.19	Upper GI	2021-06-14 16:53:45	2021-06-14 17:23:00	30	2021-06-14 17:13:34	10	2021-06-14 17:40:00	2021-06-14 17:43:52	3	2021-06-14 17:48:00	2021-06-14 18:26:00	50	38	0	0	0	0	0	1	0	0	0	0	0	1	NULL	NULL	NULL	NULL	NULL	NULL	NULL	NULL	NULL	NULL	NULL	NULL	NULL	NULL	NULL	NULL	NULL	NULL	NULL	NULL	NULL
Nursing	Female	59	19.53	Upper GI	2020-05-05 10:38:01	2020-05-05 11:01:00	23	2020-05-05 10:52:52	9	2020-05-05 11:10:00	2020-05-05 11:14:02	4	2020-05-05 11:20:00	2020-05-05 11:55:00	36	35	0	0	0	0	0	1	0	0	0	0	0	1	NULL	NULL	NULL	NULL	NULL	NULL	NULL	NULL	NULL	NULL	NULL	NULL	NULL	NULL	NULL	NULL	NULL	NULL	NULL	NULL	NULL
Nursing	Female	59	16.41	Upper GI	2020-02-11 08:40:27	2020-02-11 09:18:00	38	2020-02-11 09:12:31	6	2020-02-11 09:23:00	2020-02-11 09:35:13	12	2020-02-11 09:31:00	2020-02-11 10:00:00	55	29	0	0	0	0	0	1	0	0	0	0	0	1	NULL	NULL	NULL	NULL	NULL	NULL	NULL	NULL	NULL	NULL	NULL	NULL	NULL	NULL	NULL	NULL	NULL	NULL	NULL	NULL	NULL
Nursing	Male	71	23.75	DUAL	2020-03-09 08:42:23	2020-03-09 09:18:00	36	2020-03-09 09:11:50	7	2020-03-09 09:52:00	2020-03-09 09:59:57	7	2020-03-09 10:05:00	2020-03-09 10:30:00	77	25	1	0	1	0	0	0	0	1	0	0	0	3	NULL	NULL	NULL	NULL	NULL	NULL	NULL	NULL	NULL	NULL	NULL	NULL	NULL	NULL	NULL	NULL	NULL	NULL	NULL	NULL	NULL
Nursing	Female	50	43.77	Lower GI	2020-06-18 09:28:31	2020-06-18 09:51:00	23	2020-06-18 09:41:00	10	2020-06-18 10:10:00	2020-06-18 10:14:25	4	2020-06-18 10:23:00	2020-06-18 10:39:00	46	16	1	1	0	0	0	1	0	0	0	0	0	3	NULL	NULL	NULL	NULL	NULL	NULL	NULL	NULL	NULL	NULL	NULL	NULL	NULL	NULL	NULL	NULL	NULL	NULL	NULL	NULL	NULL
Nursing	Female	59	19.2	Lower GI	2021-03-25 06:59:46	2021-03-25 07:56:00	57	2021-03-25 07:43:19	13	2021-03-25 08:28:00	2021-03-25 08:30:36	2	2021-03-25 08:37:00	2021-03-25 08:55:00	91	18	NULL	NULL	NULL	NULL	NULL	NULL	NULL	NULL	NULL	NULL	NULL	0	NULL	NULL	NULL	NULL	NULL	NULL	NULL	NULL	NULL	NULL	NULL	NULL	NULL	NULL	NULL	NULL	NULL	NULL	NULL	NULL	NULL
Nursing	Female	72	19.74	Lower GI	2021-05-14 10:06:06	2021-05-14 10:51:00	45	2021-05-14 10:43:00	8	2021-05-14 11:16:00	2021-05-14 11:18:51	2	2021-05-14 11:24:00	2021-05-14 13:30:00	72	126	0	0	0	0	0	1	0	0	0	0	0	1	NULL	NULL	NULL	NULL	NULL	NULL	NULL	NULL	NULL	NULL	NULL	NULL	NULL	NULL	NULL	NULL	NULL	NULL	NULL	NULL	NULL
Nursing	Male	60	25.82	Lower GI	2021-02-17 16:04:45	2021-02-17 16:25:00	21	2021-02-17 16:15:00	10	2021-02-17 16:38:00	2021-02-17 16:41:59	3	2021-02-17 16:43:00	2021-02-17 17:10:00	37	27	NULL	NULL	NULL	NULL	NULL	NULL	NULL	NULL	NULL	NULL	NULL	0	NULL	NULL	NULL	NULL	NULL	NULL	NULL	NULL	NULL	NULL	NULL	NULL	NULL	NULL	NULL	NULL	NULL	NULL	NULL	NULL	NULL
Nursing	Male	68	25.8	Lower GI	2021-02-19 13:00:00	2021-02-19 13:17:00	17	2021-02-19 13:06:00	11	2021-02-19 13:40:00	2021-02-19 13:43:17	3	2021-02-19 13:48:00	2021-02-19 14:18:00	43	30	0	0	0	0	0	1	1	0	0	1	0	3	NULL	NULL	NULL	NULL	NULL	NULL	NULL	NULL	NULL	NULL	NULL	NULL	NULL	NULL	NULL	NULL	NULL	NULL	NULL	NULL	NULL
Nursing	Female	67	36.31	Lower GI	2021-05-03 12:50:19	2021-05-03 13:06:00	16	2021-05-03 12:56:00	10	2021-05-03 13:38:00	2021-05-03 13:40:48	2	2021-05-03 13:45:00	2021-05-03 14:39:00	50	54	0	0	0	0	0	1	0	0	0	0	0	1	NULL	NULL	NULL	NULL	NULL	NULL	NULL	NULL	NULL	NULL	NULL	NULL	NULL	NULL	NULL	NULL	NULL	NULL	NULL	NULL	NULL
Nursing	Male	61	18.79	Lower GI	2021-03-08 11:27:38	2021-03-08 11:38:00	11	2021-03-08 11:29:00	9	2021-03-08 11:55:00	2021-03-08 11:58:25	3	2021-03-08 12:04:00	2021-03-08 12:25:00	31	21	0	0	0	1	0	0	0	0	0	0	0	1	NULL	NULL	NULL	NULL	NULL	NULL	NULL	NULL	NULL	NULL	NULL	NULL	NULL	NULL	NULL	NULL	NULL	NULL	NULL	NULL	NULL
Nursing	Female	59	39.99	Upper GI	2021-04-29 07:15:51	2021-04-29 07:33:00	18	2021-04-29 07:22:00	11	2021-04-29 07:39:00	2021-04-29 07:55:00	16	2021-04-29 08:03:00	2021-04-29 08:53:00	40	50	0	1	0	1	0	0	0	1	0	0	0	3	NULL	NULL	NULL	NULL	NULL	NULL	NULL	NULL	NULL	NULL	NULL	NULL	NULL	NULL	NULL	NULL	NULL	NULL	NULL	NULL	NULL
Nursing	Male	44	30.81	Lower GI	2020-11-04 13:04:30	2020-11-04 13:28:00	24	2020-11-04 13:17:52	11	2020-11-04 13:51:00	2020-11-04 13:56:45	5	2020-11-04 14:02:00	2020-11-04 14:32:00	52	30	NULL	NULL	NULL	NULL	NULL	NULL	NULL	NULL	NULL	NULL	NULL	0	NULL	NULL	NULL	NULL	NULL	NULL	NULL	NULL	NULL	NULL	NULL	NULL	NULL	NULL	NULL	NULL	NULL	NULL	NULL	NULL	NULL
Nursing	Female	56	21.97	Upper GI	2020-07-15 13:32:23	2020-07-15 13:58:00	26	2020-07-15 13:47:20	11	2020-07-15 14:05:00	2020-07-15 14:09:35	4	2020-07-15 14:15:00	2020-07-15 14:32:00	37	17	NULL	NULL	NULL	NULL	NULL	NULL	NULL	NULL	NULL	NULL	NULL	0	NULL	NULL	NULL	NULL	NULL	NULL	NULL	NULL	NULL	NULL	NULL	NULL	NULL	NULL	NULL	NULL	NULL	NULL	NULL	NULL	NULL
Nursing	Male	54	24.39	Lower GI	2021-01-07 07:49:03	2021-01-07 08:21:00	32	2021-01-07 08:08:00	13	2021-01-07 08:48:00	2021-01-07 08:51:36	3	2021-01-07 08:57:00	2021-01-07 09:44:00	62	47	0	0	0	0	0	0	0	0	0	0	0	0	NULL	NULL	NULL	NULL	NULL	NULL	NULL	NULL	NULL	NULL	NULL	NULL	NULL	NULL	NULL	NULL	NULL	NULL	NULL	NULL	NULL
Nursing	Male	60	27.12	Upper GI	2021-01-12 07:24:20	2021-01-12 07:52:00	28	2021-01-12 07:41:26	11	2021-01-12 07:58:00	2021-01-12 08:02:10	4	2021-01-12 08:15:00	2021-01-12 08:44:00	38	29	0	0	0	0	1	1	1	1	0	1	0	5	NULL	NULL	NULL	NULL	NULL	NULL	NULL	NULL	NULL	NULL	NULL	NULL	NULL	NULL	NULL	NULL	NULL	NULL	NULL	NULL	NULL
Nursing	Female	58	23.38	Lower GI	2020-06-09 09:55:59	2020-06-09 10:20:00	25	2020-06-09 10:10:52	10	2020-06-09 10:46:00	2020-06-09 10:55:00	9	2020-06-09 10:54:00	2020-06-09 11:01:00	60	7	0	1	0	0	0	0	0	0	0	0	0	1	NULL	NULL	NULL	NULL	NULL	NULL	NULL	NULL	NULL	NULL	NULL	NULL	NULL	NULL	NULL	NULL	NULL	NULL	NULL	NULL	NULL
Anesthesia	Male	50	30.42	Lower GI	2021-09-13 13:12:54	2021-09-13 13:18:00	6	2021-09-13 13:12:00	6	2021-09-13 13:35:00	2021-09-13 13:37:10	2	2021-09-13 13:36:00	2021-09-13 14:07:00	25	31	0	0	0	1	0	0	0	0	0	0	0	1	NULL	NULL	NULL	NULL	NULL	NULL	NULL	NULL	NULL	NULL	NULL	NULL	NULL	NULL	NULL	NULL	NULL	NULL	NULL	NULL	NULL
Nursing	Male	54	22.05	Lower GI	2021-06-15 10:12:55	2021-06-15 11:05:00	53	2021-06-15 10:58:21	7	2021-06-15 11:09:00	2021-06-15 11:12:34	3	2021-06-15 11:18:00	2021-06-15 11:53:00	60	35	0	0	0	1	0	0	0	0	0	0	0	1	NULL	NULL	NULL	NULL	NULL	NULL	NULL	NULL	NULL	NULL	NULL	NULL	NULL	NULL	NULL	NULL	NULL	NULL	NULL	NULL	NULL
Anesthesia	Female	51	28.66	Upper GI	2021-08-26 10:35:30	2021-08-26 10:40:00	5	2021-08-26 10:33:00	7	2021-08-26 10:52:00	2021-08-26 10:54:56	2	2021-08-26 11:04:00	2021-08-26 11:15:00	19	11	0	1	0	1	0	0	0	0	0	0	0	2	NULL	NULL	NULL	NULL	NULL	NULL	NULL	NULL	NULL	NULL	NULL	NULL	NULL	NULL	NULL	NULL	NULL	NULL	NULL	NULL	NULL
Nursing	Male	51	25.09	Lower GI	2021-06-24 13:30:00	2021-06-24 13:48:00	18	2021-06-24 13:39:00	9	2021-06-24 14:09:00	2021-06-24 14:15:30	6	2021-06-24 14:21:00	2021-06-24 15:04:00	45	43	0	0	0	1	0	0	0	0	0	0	0	1	NULL	NULL	NULL	NULL	NULL	NULL	NULL	NULL	NULL	NULL	NULL	NULL	NULL	NULL	NULL	NULL	NULL	NULL	NULL	NULL	NULL
Nursing	Female	53	34.33	Lower GI	2021-03-18 09:17:05	2021-03-18 10:17:00	60	2021-03-18 10:11:50	6	2021-03-18 10:30:00	2021-03-18 10:32:01	2	2021-03-18 10:39:00	2021-03-18 11:05:00	75	26	0	0	0	1	0	0	0	0	0	0	0	1	NULL	NULL	NULL	NULL	NULL	NULL	NULL	NULL	NULL	NULL	NULL	NULL	NULL	NULL	NULL	NULL	NULL	NULL	NULL	NULL	NULL
Nursing	Female	50	29.21	Lower GI	2021-05-24 11:45:00	2021-05-24 12:10:00	25	2021-05-24 12:03:21	7	2021-05-24 12:22:00	2021-05-24 12:25:54	3	2021-05-24 12:30:00	2021-05-24 13:06:00	40	36	0	0	0	1	0	1	0	1	0	0	0	3	NULL	NULL	NULL	NULL	NULL	NULL	NULL	NULL	NULL	NULL	NULL	NULL	NULL	NULL	NULL	NULL	NULL	NULL	NULL	NULL	NULL
Nursing	Female	72	35.67	Upper GI	2020-07-10 09:49:09	2020-07-10 10:23:00	34	2020-07-10 10:11:28	12	2020-07-10 10:25:00	2020-07-10 10:31:43	6	2020-07-10 10:35:00	2020-07-10 11:20:00	42	45	1	1	0	1	0	0	0	1	0	0	0	4	NULL	NULL	NULL	NULL	NULL	NULL	NULL	NULL	NULL	NULL	NULL	NULL	NULL	NULL	NULL	NULL	NULL	NULL	NULL	NULL	NULL
Anesthesia	Male	60	27.55	Lower GI	2021-09-30 14:23:59	2021-09-30 14:31:00	8	2021-09-30 14:22:00	9	2021-09-30 14:44:00	2021-09-30 14:52:03	8	2021-09-30 14:56:00	2021-09-30 16:27:00	29	91	0	1	0	0	0	0	0	1	0	0	0	2	NULL	NULL	NULL	NULL	NULL	NULL	NULL	NULL	NULL	NULL	NULL	NULL	NULL	NULL	NULL	NULL	NULL	NULL	NULL	NULL	NULL
Nursing	Male	68	31	Upper GI	2020-02-25 10:53:10	2020-02-25 11:25:00	32	2020-02-25 11:18:15	7	2020-02-25 11:30:00	2020-02-25 11:34:28	4	2020-02-25 11:39:00	2020-02-25 13:57:00	41	138	0	0	0	0	0	0	0	1	0	0	0	1	NULL	NULL	NULL	NULL	NULL	NULL	NULL	NULL	NULL	NULL	NULL	NULL	NULL	NULL	NULL	NULL	NULL	NULL	NULL	NULL	NULL
Nursing	Female	64	27.96	DUAL	2020-10-14 15:26:01	2020-10-14 15:50:00	24	2020-10-14 15:39:21	11	2020-10-14 16:16:00	2020-10-14 16:21:36	5	2020-10-14 16:26:00	2020-10-14 17:12:00	55	46	1	0	1	1	0	1	1	1	0	1	0	7	NULL	NULL	NULL	NULL	NULL	NULL	NULL	NULL	NULL	NULL	NULL	NULL	NULL	NULL	NULL	NULL	NULL	NULL	NULL	NULL	NULL
Nursing	Male	61	26.78	Lower GI	2020-01-07 07:16:23	2020-01-07 07:50:00	34	2020-01-07 07:38:00	12	2020-01-07 08:05:00	2020-01-07 08:08:00	3	2020-01-07 08:15:00	2020-01-07 09:35:00	52	80	NULL	NULL	NULL	NULL	NULL	NULL	NULL	NULL	NULL	NULL	NULL	0	NULL	NULL	NULL	NULL	NULL	NULL	NULL	NULL	NULL	NULL	NULL	NULL	NULL	NULL	NULL	NULL	NULL	NULL	NULL	NULL	NULL
Nursing	Female	51	28.19	Lower GI	2020-01-20 14:43:18	2020-01-20 15:52:00	69	2020-01-20 15:40:36	12	2020-01-20 16:01:00	2020-01-20 16:02:06	1	2020-01-20 16:05:00	2020-01-20 16:22:00	79	17	0	0	0	0	0	1	0	0	0	0	0	1	NULL	NULL	NULL	NULL	NULL	NULL	NULL	NULL	NULL	NULL	NULL	NULL	NULL	NULL	NULL	NULL	NULL	NULL	NULL	NULL	NULL
Anesthesia	Male	65	21.63	DUAL	2021-09-03 15:00:25	2021-09-03 15:07:00	7	2021-09-03 15:00:00	7	2021-09-03 15:47:00	2021-09-03 15:53:05	6	2021-09-03 15:57:00	2021-09-03 16:37:00	53	40	0	1	0	0	0	0	0	0	0	0	0	1	NULL	NULL	NULL	NULL	NULL	NULL	NULL	NULL	NULL	NULL	NULL	NULL	NULL	NULL	NULL	NULL	NULL	NULL	NULL	NULL	NULL
Nursing	Female	64	20.97	Lower GI	2020-11-05 13:04:45	2020-11-05 13:17:00	13	2020-11-05 13:09:00	8	2020-11-05 13:32:00	2020-11-05 13:34:15	2	2020-11-05 13:40:00	2020-11-05 14:32:00	30	52	0	1	0	1	0	1	1	0	0	1	1	6	NULL	NULL	NULL	NULL	NULL	NULL	NULL	NULL	NULL	NULL	NULL	NULL	NULL	NULL	NULL	NULL	NULL	NULL	NULL	NULL	NULL
Nursing	Female	64	22.3	Lower GI	2020-03-19 12:46:29	2020-03-19 13:01:00	15	2020-03-19 12:51:00	10	2020-03-19 13:11:00	2020-03-19 13:14:10	3	2020-03-19 13:18:00	2020-03-19 14:09:00	28	51	0	1	0	1	0	1	1	0	0	1	1	6	NULL	NULL	NULL	NULL	NULL	NULL	NULL	NULL	NULL	NULL	NULL	NULL	NULL	NULL	NULL	NULL	NULL	NULL	NULL	NULL	NULL
Nursing	Female	64	21.13	Lower GI	2020-06-19 14:29:37	2020-06-19 15:34:00	65	2020-06-19 15:04:30	30	2020-06-19 15:44:00	2020-06-19 15:49:22	5	2020-06-19 15:59:00	2020-06-19 16:29:00	80	30	0	1	0	1	0	1	1	0	0	1	1	6	NULL	NULL	NULL	NULL	NULL	NULL	NULL	NULL	NULL	NULL	NULL	NULL	NULL	NULL	NULL	NULL	NULL	NULL	NULL	NULL	NULL
Nursing	Male	69	27.99	Lower GI	2021-02-12 10:35:55	2021-02-12 10:55:00	20	2021-02-12 10:43:35	12	2021-02-12 11:35:00	2021-02-12 11:41:47	6	2021-02-12 11:48:00	2021-02-12 12:15:00	66	27	0	0	0	0	0	1	1	0	0	1	0	3	NULL	NULL	NULL	NULL	NULL	NULL	NULL	NULL	NULL	NULL	NULL	NULL	NULL	NULL	NULL	NULL	NULL	NULL	NULL	NULL	NULL
Nursing	Male	60	24.41	Lower GI	2020-08-03 07:48:26	2020-08-03 08:21:00	33	2020-08-03 08:09:20	12	2020-08-03 08:40:00	2020-08-03 08:43:24	3	2020-08-03 08:45:00	2020-08-03 11:59:00	55	194	0	0	0	1	0	1	0	0	0	0	0	2	NULL	NULL	NULL	NULL	NULL	NULL	NULL	NULL	NULL	NULL	NULL	NULL	NULL	NULL	NULL	NULL	NULL	NULL	NULL	NULL	NULL
Nursing	Female	48	22.05	Upper GI	2020-06-01 09:12:52	2020-06-01 09:43:00	31	2020-06-01 09:36:29	7	2020-06-01 09:51:00	2020-06-01 09:55:28	4	2020-06-01 10:02:00	2020-06-01 10:33:00	43	31	0	0	0	1	0	0	0	0	0	0	0	1	NULL	NULL	NULL	NULL	NULL	NULL	NULL	NULL	NULL	NULL	NULL	NULL	NULL	NULL	NULL	NULL	NULL	NULL	NULL	NULL	NULL
Anesthesia	Female	48	28.34	DUAL	2021-10-08 09:01:30	2021-10-08 09:17:00	16	2021-10-08 08:58:00	19	2021-10-08 09:54:00	2021-10-08 10:04:45	10	2021-10-08 10:00:00	2021-10-08 12:00:00	63	120	NULL	NULL	NULL	NULL	NULL	NULL	NULL	NULL	NULL	NULL	NULL	0	NULL	NULL	NULL	NULL	NULL	NULL	NULL	NULL	NULL	NULL	NULL	NULL	NULL	NULL	NULL	NULL	NULL	NULL	NULL	NULL	NULL
Anesthesia	Female	55	19.53	Upper GI	2021-08-23 09:22:41	2021-08-23 09:37:00	15	2021-08-23 09:22:00	15	2021-08-23 09:48:00	2021-08-23 09:49:18	1	2021-08-23 09:55:00	2021-08-23 10:30:00	27	35	0	0	0	1	0	0	0	0	0	0	0	1	NULL	NULL	NULL	NULL	NULL	NULL	NULL	NULL	NULL	NULL	NULL	NULL	NULL	NULL	NULL	NULL	NULL	NULL	NULL	NULL	NULL
Nursing	Male	50	36.64	Lower GI	2020-03-03 09:03:59	2020-03-03 09:24:00	21	2020-03-03 09:13:13	11	2020-03-03 10:01:00	2020-03-03 10:03:08	2	2020-03-03 10:10:00	2020-03-03 10:25:00	60	15	0	0	0	1	0	0	0	0	0	0	0	1	NULL	NULL	NULL	NULL	NULL	NULL	NULL	NULL	NULL	NULL	NULL	NULL	NULL	NULL	NULL	NULL	NULL	NULL	NULL	NULL	NULL
Nursing	Female	53	24.8	Lower GI	2021-02-16 08:38:51	2021-02-16 08:55:00	17	2021-02-16 08:42:00	13	2021-02-16 09:32:00	2021-02-16 09:34:14	2	2021-02-16 09:38:00	2021-02-16 10:28:00	56	50	0	1	0	1	0	1	0	0	0	0	0	3	NULL	NULL	NULL	NULL	NULL	NULL	NULL	NULL	NULL	NULL	NULL	NULL	NULL	NULL	NULL	NULL	NULL	NULL	NULL	NULL	NULL
Nursing	Male	76	25.74	Lower GI	2021-01-05 10:49:42	2021-01-05 11:45:00	56	2021-01-05 11:33:00	12	2021-01-05 12:04:00	2021-01-05 12:06:25	2	2021-01-05 12:15:00	2021-01-05 12:42:00	77	27	0	0	0	0	0	0	1	0	0	1	0	2	NULL	NULL	NULL	NULL	NULL	NULL	NULL	NULL	NULL	NULL	NULL	NULL	NULL	NULL	NULL	NULL	NULL	NULL	NULL	NULL	NULL
Nursing	Female	49	32.12	Upper GI	2021-05-05 15:50:00	2021-05-05 16:14:00	24	2021-05-05 16:06:49	8	2021-05-05 16:18:00	2021-05-05 16:22:00	4	2021-05-05 16:27:00	2021-05-05 17:07:00	32	40	NULL	NULL	NULL	NULL	NULL	NULL	NULL	NULL	NULL	NULL	NULL	0	NULL	NULL	NULL	NULL	NULL	NULL	NULL	NULL	NULL	NULL	NULL	NULL	NULL	NULL	NULL	NULL	NULL	NULL	NULL	NULL	NULL
Nursing	Female	56	38.01	Lower GI	2020-03-09 15:30:23	2020-03-09 15:58:00	28	2020-03-09 15:43:54	15	2020-03-09 16:17:00	2020-03-09 16:21:20	4	2020-03-09 16:30:00	2020-03-09 17:23:00	51	53	0	1	0	0	0	1	0	0	0	0	0	2	NULL	NULL	NULL	NULL	NULL	NULL	NULL	NULL	NULL	NULL	NULL	NULL	NULL	NULL	NULL	NULL	NULL	NULL	NULL	NULL	NULL
Nursing	Male	69	32.04	Lower GI	2020-08-12 14:45:47	2020-08-12 14:54:00	9	2020-08-12 14:50:15	4	2020-08-12 15:11:00	2020-08-12 15:16:06	5	2020-08-12 15:20:00	2020-08-12 15:55:00	31	35	0	0	0	0	0	1	1	0	0	1	0	3	NULL	NULL	NULL	NULL	NULL	NULL	NULL	NULL	NULL	NULL	NULL	NULL	NULL	NULL	NULL	NULL	NULL	NULL	NULL	NULL	NULL
Nursing	Male	69	29.03	Lower GI	2020-09-28 08:05:00	2020-09-28 08:18:00	13	2020-09-28 08:10:00	8	2020-09-28 08:35:00	2020-09-28 08:39:09	4	2020-09-28 08:45:00	2020-09-28 09:17:00	34	32	0	0	0	0	0	1	0	0	0	0	0	1	NULL	NULL	NULL	NULL	NULL	NULL	NULL	NULL	NULL	NULL	NULL	NULL	NULL	NULL	NULL	NULL	NULL	NULL	NULL	NULL	NULL
Nursing	Male	49	28.87	DUAL	2020-01-24 10:36:34	2020-01-24 11:07:00	31	2020-01-24 10:54:59	13	2020-01-24 11:32:00	2020-01-24 11:33:22	1	2020-01-24 11:42:00	2020-01-24 12:45:00	57	63	0	0	0	1	0	1	1	0	0	1	0	4	NULL	NULL	NULL	NULL	NULL	NULL	NULL	NULL	NULL	NULL	NULL	NULL	NULL	NULL	NULL	NULL	NULL	NULL	NULL	NULL	NULL
Nursing	Female	68	22.86	Upper GI	2020-05-28 08:18:21	2020-05-28 09:14:00	56	2020-05-28 09:10:11	4	2020-05-28 09:43:00	2020-05-28 09:44:35	1	2020-05-28 09:50:00	2020-05-28 10:35:00	86	45	NULL	NULL	NULL	NULL	NULL	NULL	NULL	NULL	NULL	NULL	NULL	0	NULL	NULL	NULL	NULL	NULL	NULL	NULL	NULL	NULL	NULL	NULL	NULL	NULL	NULL	NULL	NULL	NULL	NULL	NULL	NULL	NULL
Nursing	Female	45	29.95	Upper GI	2020-01-21 07:22:23	2020-01-21 08:05:00	43	2020-01-21 07:58:43	7	2020-01-21 08:09:00	2020-01-21 08:10:14	1	2020-01-21 08:20:00	2020-01-21 09:30:00	48	70	1	0	0	1	0	0	0	0	0	0	0	2	NULL	NULL	NULL	NULL	NULL	NULL	NULL	NULL	NULL	NULL	NULL	NULL	NULL	NULL	NULL	NULL	NULL	NULL	NULL	NULL	NULL
Nursing	Female	57	32.23	Lower GI	2021-03-15 12:34:33	2021-03-15 13:12:00	38	2021-03-15 13:03:00	9	2021-03-15 13:30:00	2021-03-15 13:35:38	5	2021-03-15 13:42:00	2021-03-15 13:50:00	61	8	NULL	NULL	NULL	NULL	NULL	NULL	NULL	NULL	NULL	NULL	NULL	0	NULL	NULL	NULL	NULL	NULL	NULL	NULL	NULL	NULL	NULL	NULL	NULL	NULL	NULL	NULL	NULL	NULL	NULL	NULL	NULL	NULL
Nursing	Male	72	25.38	Lower GI	2020-02-25 08:10:38	2020-02-25 08:55:00	45	2020-02-25 08:49:42	6	2020-02-25 09:25:00	2020-02-25 09:27:33	2	2020-02-25 09:32:00	2020-02-25 10:14:00	77	42	1	0	0	0	0	0	0	0	0	0	0	1	NULL	NULL	NULL	NULL	NULL	NULL	NULL	NULL	NULL	NULL	NULL	NULL	NULL	NULL	NULL	NULL	NULL	NULL	NULL	NULL	NULL
Nursing	Female	60	38.41	Lower GI	2021-05-03 15:48:09	2021-05-03 16:00:00	12	2021-05-03 15:56:20	4	2021-05-03 16:25:00	2021-05-03 16:28:06	3	2021-05-03 16:30:00	2021-05-03 16:42:00	40	12	1	0	0	0	0	1	0	0	0	0	0	2	NULL	NULL	NULL	NULL	NULL	NULL	NULL	NULL	NULL	NULL	NULL	NULL	NULL	NULL	NULL	NULL	NULL	NULL	NULL	NULL	NULL
Nursing	Male	62	21.29	Lower GI	2020-03-09 11:05:05	2020-03-09 12:08:00	63	2020-03-09 11:58:16	10	2020-03-09 12:17:00	2020-03-09 12:21:52	4	2020-03-09 12:27:00	2020-03-09 13:24:00	76	57	0	0	0	0	0	1	0	0	0	0	0	1	NULL	NULL	NULL	NULL	NULL	NULL	NULL	NULL	NULL	NULL	NULL	NULL	NULL	NULL	NULL	NULL	NULL	NULL	NULL	NULL	NULL
Nursing	Female	73	23.69	Upper GI	2020-02-21 09:17:44	2020-02-21 09:49:00	32	2020-02-21 09:42:36	7	2020-02-21 09:53:00	2020-02-21 09:58:57	5	2020-02-21 10:05:00	2020-02-21 11:00:00	41	55	0	0	1	0	0	1	0	1	0	0	0	3	NULL	NULL	NULL	NULL	NULL	NULL	NULL	NULL	NULL	NULL	NULL	NULL	NULL	NULL	NULL	NULL	NULL	NULL	NULL	NULL	NULL
Nursing	Female	65	24.56	Lower GI	2020-08-19 10:48:14	2020-08-19 11:31:00	43	2020-08-19 11:25:18	6	2020-08-19 11:53:00	2020-08-19 11:54:10	1	2020-08-19 11:59:00	2020-08-19 13:17:00	66	78	NULL	NULL	NULL	NULL	NULL	NULL	NULL	NULL	NULL	NULL	NULL	0	NULL	NULL	NULL	NULL	NULL	NULL	NULL	NULL	NULL	NULL	NULL	NULL	NULL	NULL	NULL	NULL	NULL	NULL	NULL	NULL	NULL
Nursing	Male	27	17.5	DUAL	2020-01-23 08:29:51	2020-01-23 08:40:00	11	2020-01-23 08:34:57	6	2020-01-23 08:43:00	2020-01-23 09:06:06	23	2020-01-23 09:12:00	2020-01-23 09:51:00	37	39	0	0	0	0	0	0	1	0	0	1	0	2	NULL	NULL	NULL	NULL	NULL	NULL	NULL	NULL	NULL	NULL	NULL	NULL	NULL	NULL	NULL	NULL	NULL	NULL	NULL	NULL	NULL
Nursing	Female	67	30.73	Lower GI	2021-02-03 08:50:33	2021-02-03 09:22:00	32	2021-02-03 09:16:00	6	2021-02-03 09:39:00	2021-02-03 09:42:08	3	2021-02-03 09:45:00	2021-02-03 10:15:00	52	30	0	0	0	1	0	0	0	0	0	0	0	1	NULL	NULL	NULL	NULL	NULL	NULL	NULL	NULL	NULL	NULL	NULL	NULL	NULL	NULL	NULL	NULL	NULL	NULL	NULL	NULL	NULL
Nursing	Female	43	30.86	Upper GI	2020-07-22 15:35:37	2020-07-22 16:04:00	29	2020-07-22 15:52:29	12	2020-07-22 16:10:00	2020-07-22 16:16:00	6	2020-07-22 16:21:00	2020-07-22 17:00:00	41	39	0	1	0	0	0	1	0	0	0	0	0	2	NULL	NULL	NULL	NULL	NULL	NULL	NULL	NULL	NULL	NULL	NULL	NULL	NULL	NULL	NULL	NULL	NULL	NULL	NULL	NULL	NULL
Nursing	Female	52	31.32	Lower GI	2020-01-10 08:35:46	2020-01-10 09:17:00	42	2020-01-10 09:09:00	8	2020-01-10 09:29:00	2020-01-10 09:35:00	6	2020-01-10 09:38:00	2020-01-10 10:05:00	60	27	NULL	NULL	NULL	NULL	NULL	NULL	NULL	NULL	NULL	NULL	NULL	0	NULL	NULL	NULL	NULL	NULL	NULL	NULL	NULL	NULL	NULL	NULL	NULL	NULL	NULL	NULL	NULL	NULL	NULL	NULL	NULL	NULL
Nursing	Female	60	29.66	Lower GI	2020-02-03 13:15:54	2020-02-03 13:27:00	12	2020-02-03 13:21:21	6	2020-02-03 13:43:00	2020-02-03 13:45:19	2	2020-02-03 13:50:00	2020-02-03 15:06:00	30	76	1	0	0	1	0	1	0	1	0	0	0	4	NULL	NULL	NULL	NULL	NULL	NULL	NULL	NULL	NULL	NULL	NULL	NULL	NULL	NULL	NULL	NULL	NULL	NULL	NULL	NULL	NULL
Nursing	Female	73	32.61	Lower GI	2021-02-17 13:07:02	2021-02-17 13:25:00	18	2021-02-17 13:17:00	8	2021-02-17 13:44:00	2021-02-17 13:47:00	3	2021-02-17 13:52:00	2021-02-17 14:59:00	40	67	1	1	0	1	0	1	0	0	0	0	0	4	4	mg	NULL	NULL	NULL	NULL	NULL	NULL	NULL	NULL	NULL	NULL	NULL	NULL	NULL	NULL	NULL	NULL	NULL	NULL	NULL
Nursing	Female	54	29.86	Upper GI	2021-06-07 14:43:32	2021-06-07 15:00:00	17	2021-06-07 14:46:00	14	2021-06-07 15:09:00	2021-06-07 15:10:43	1	2021-06-07 15:15:00	2021-06-07 16:00:00	27	45	1	1	0	1	0	0	0	0	0	0	0	3	NULL	NULL	NULL	NULL	NULL	NULL	NULL	NULL	NULL	NULL	NULL	NULL	NULL	NULL	NULL	NULL	NULL	NULL	NULL	NULL	NULL
Anesthesia	Female	66	42.29	Lower GI	2021-09-20 08:55:54	2021-09-20 09:07:00	12	2021-09-20 08:59:00	8	2021-09-20 09:22:00	2021-09-20 09:23:02	1	2021-09-20 09:31:00	2021-09-20 10:10:00	28	39	0	1	0	0	0	1	0	0	0	0	0	2	NULL	NULL	NULL	NULL	NULL	NULL	NULL	NULL	NULL	NULL	NULL	NULL	NULL	NULL	NULL	NULL	NULL	NULL	NULL	NULL	NULL
Nursing	Male	55	25.85	Lower GI	2021-06-09 07:50:00	2021-06-09 08:16:00	26	2021-06-09 08:07:54	9	2021-06-09 08:29:00	2021-06-09 08:32:37	3	2021-06-09 08:35:00	2021-06-09 09:03:00	42	28	1	0	0	0	0	0	0	0	0	0	0	1	NULL	NULL	NULL	NULL	NULL	NULL	NULL	NULL	NULL	NULL	NULL	NULL	NULL	NULL	NULL	NULL	NULL	NULL	NULL	NULL	NULL
Nursing	Male	73	34.87	Lower GI	2020-01-28 07:41:45	2020-01-28 08:21:00	40	2020-01-28 08:15:00	6	2020-01-28 08:38:00	2020-01-28 08:40:00	2	2020-01-28 08:50:00	2020-01-28 09:00:00	59	10	1	0	0	0	0	1	0	0	0	0	0	2	NULL	NULL	NULL	NULL	NULL	NULL	NULL	NULL	NULL	NULL	NULL	NULL	NULL	NULL	NULL	NULL	NULL	NULL	NULL	NULL	NULL
Anesthesia	Female	50	27.29	Upper GI	2021-10-25 11:45:05	2021-10-25 11:47:00	2	2021-10-25 11:44:00	3	2021-10-25 11:50:00	2021-10-25 11:52:03	2	2021-10-25 11:55:00	2021-10-25 12:22:00	7	27	1	1	0	0	0	1	1	1	0	1	0	6	NULL	NULL	NULL	NULL	NULL	NULL	NULL	NULL	NULL	NULL	NULL	NULL	NULL	NULL	NULL	NULL	NULL	NULL	NULL	NULL	NULL
Nursing	Male	59	28.89	Lower GI	2020-03-09 12:54:43	2020-03-09 13:14:00	20	2020-03-09 13:04:25	10	2020-03-09 13:29:00	2020-03-09 13:33:24	4	2020-03-09 13:35:00	2020-03-09 13:56:00	39	21	0	0	0	0	0	1	0	0	0	0	0	1	NULL	NULL	NULL	NULL	NULL	NULL	NULL	NULL	NULL	NULL	NULL	NULL	NULL	NULL	NULL	NULL	NULL	NULL	NULL	NULL	NULL
Nursing	Male	50	NULL	Upper GI	2020-01-16 09:00:45	2020-01-16 09:39:00	39	2020-01-16 09:31:48	8	2020-01-16 09:48:00	2020-01-16 09:50:28	2	2020-01-16 09:56:00	2020-01-16 11:13:00	50	77	0	0	0	1	0	0	0	1	0	0	0	2	NULL	NULL	NULL	NULL	NULL	NULL	NULL	NULL	NULL	NULL	NULL	NULL	NULL	NULL	NULL	NULL	NULL	NULL	NULL	NULL	NULL
Anesthesia	Female	57	20.96	Lower GI	2021-08-02 13:57:16	2021-08-02 14:03:00	6	2021-08-02 13:57:00	6	2021-08-02 14:21:00	2021-08-02 14:23:09	2	2021-08-02 14:27:00	2021-08-02 15:05:00	26	38	0	1	0	0	0	0	0	0	0	0	0	1	NULL	NULL	NULL	NULL	NULL	NULL	NULL	NULL	NULL	NULL	NULL	NULL	NULL	NULL	NULL	NULL	NULL	NULL	NULL	NULL	NULL
Nursing	Female	73	28.34	Lower GI	2021-05-07 09:09:42	2021-05-07 09:41:00	32	2021-05-07 09:33:58	8	2021-05-07 09:55:00	2021-05-07 09:59:08	4	2021-05-07 10:04:00	2021-05-07 10:28:00	50	24	0	0	0	0	0	1	0	1	0	0	1	3	NULL	NULL	NULL	NULL	NULL	NULL	NULL	NULL	NULL	NULL	NULL	NULL	NULL	NULL	NULL	NULL	NULL	NULL	NULL	NULL	NULL
Nursing	Male	72	34.44	Lower GI	2021-04-28 08:24:16	2021-04-28 08:38:00	14	2021-04-28 08:31:31	7	2021-04-28 09:10:00	2021-04-28 09:16:24	6	2021-04-28 09:22:00	2021-04-28 09:36:00	52	14	1	0	0	1	0	1	0	0	0	0	0	3	NULL	NULL	NULL	NULL	NULL	NULL	NULL	NULL	NULL	NULL	NULL	NULL	NULL	NULL	NULL	NULL	NULL	NULL	NULL	NULL	NULL
Nursing	Male	45	19.58	Upper GI	2021-03-09 10:10:59	2021-03-09 11:12:00	62	2021-03-09 11:01:00	11	2021-03-09 11:19:00	2021-03-09 11:21:17	2	2021-03-09 11:24:00	2021-03-09 12:15:00	71	51	NULL	NULL	NULL	NULL	NULL	NULL	NULL	NULL	NULL	NULL	NULL	0	NULL	NULL	NULL	NULL	NULL	NULL	NULL	NULL	NULL	NULL	NULL	NULL	NULL	NULL	NULL	NULL	NULL	NULL	NULL	NULL	NULL
Anesthesia	Female	27	20.98	Upper GI	2021-09-13 09:20:28	2021-09-13 09:24:00	4	2021-09-13 09:18:00	6	2021-09-13 09:42:00	2021-09-13 09:44:02	2	2021-09-13 09:49:00	2021-09-13 10:30:00	24	41	0	1	0	1	0	0	0	0	0	0	0	2	NULL	NULL	NULL	NULL	NULL	NULL	NULL	NULL	NULL	NULL	NULL	NULL	NULL	NULL	NULL	NULL	NULL	NULL	NULL	NULL	NULL
Nursing	Female	68	29.05	Lower GI	2021-05-19 07:56:25	2021-05-19 08:07:00	11	2021-05-19 08:00:00	7	2021-05-19 08:19:00	2021-05-19 08:25:09	6	2021-05-19 08:30:00	2021-05-19 08:45:00	29	15	NULL	NULL	NULL	NULL	NULL	NULL	NULL	NULL	NULL	NULL	NULL	0	NULL	NULL	NULL	NULL	NULL	NULL	NULL	NULL	NULL	NULL	NULL	NULL	NULL	NULL	NULL	NULL	NULL	NULL	NULL	NULL	NULL
Nursing	Female	51	20.05	Lower GI	2020-08-11 07:37:30	2020-08-11 08:04:00	27	2020-08-11 07:52:48	12	2020-08-11 08:29:00	2020-08-11 08:33:37	4	2020-08-11 08:38:00	2020-08-11 08:53:00	56	15	NULL	NULL	NULL	NULL	NULL	NULL	NULL	NULL	NULL	NULL	NULL	0	NULL	NULL	NULL	NULL	NULL	NULL	NULL	NULL	NULL	NULL	NULL	NULL	NULL	NULL	NULL	NULL	NULL	NULL	NULL	NULL	NULL
Nursing	Male	55	27.2	Lower GI	2020-10-19 16:53:21	2020-10-19 17:23:00	30	2020-10-19 17:11:08	12	2020-10-19 18:02:00	2020-10-19 18:07:01	5	2020-10-19 18:12:00	2020-10-19 18:51:00	74	39	0	0	0	0	0	0	1	0	0	1	0	2	NULL	NULL	NULL	NULL	NULL	NULL	NULL	NULL	NULL	NULL	NULL	NULL	NULL	NULL	NULL	NULL	NULL	NULL	NULL	NULL	NULL
Nursing	Male	68	26.78	Lower GI	2020-07-28 10:16:45	2020-07-28 10:41:00	25	2020-07-28 10:35:12	6	2020-07-28 12:20:00	2020-07-28 12:23:09	3	2020-07-28 12:02:00	2020-07-28 13:30:00	127	88	0	1	0	0	0	1	0	0	0	0	0	2	NULL	NULL	NULL	NULL	NULL	NULL	NULL	NULL	NULL	NULL	NULL	NULL	NULL	NULL	NULL	NULL	NULL	NULL	NULL	NULL	NULL
Nursing	Male	57	24.75	Lower GI	2021-02-18 06:48:29	2021-02-18 07:16:00	28	2021-02-18 07:05:00	11	2021-02-18 07:31:00	2021-02-18 07:33:53	2	2021-02-18 07:38:00	2021-02-18 08:12:00	45	34	NULL	NULL	NULL	NULL	NULL	NULL	NULL	NULL	NULL	NULL	NULL	0	NULL	NULL	NULL	NULL	NULL	NULL	NULL	NULL	NULL	NULL	NULL	NULL	NULL	NULL	NULL	NULL	NULL	NULL	NULL	NULL	NULL
Anesthesia	Female	59	27.29	Lower GI	2021-08-04 15:58:04	2021-08-04 16:01:00	3	2021-08-04 15:56:00	5	2021-08-04 16:24:00	2021-08-04 16:31:34	7	2021-08-04 16:33:00	2021-08-04 17:01:00	33	28	NULL	NULL	NULL	NULL	NULL	NULL	NULL	NULL	NULL	NULL	NULL	0	NULL	NULL	NULL	NULL	NULL	NULL	NULL	NULL	NULL	NULL	NULL	NULL	NULL	NULL	NULL	NULL	NULL	NULL	NULL	NULL	NULL
Nursing	Male	54	28.59	Lower GI	2020-05-21 15:37:20	2020-05-21 15:51:00	14	2020-05-21 15:39:00	12	2020-05-21 16:02:00	2020-05-21 16:05:34	3	2020-05-21 16:08:00	2020-05-21 16:15:00	28	7	0	0	0	0	0	0	0	1	0	0	0	1	NULL	NULL	NULL	NULL	NULL	NULL	NULL	NULL	NULL	NULL	NULL	NULL	NULL	NULL	NULL	NULL	NULL	NULL	NULL	NULL	NULL
Nursing	Female	51	25.06	Lower GI	2021-02-04 12:28:58	2021-02-04 13:16:00	48	2021-02-04 13:06:00	10	2021-02-04 13:32:00	2021-02-04 13:34:33	2	2021-02-04 13:40:00	2021-02-04 14:15:00	66	35	0	0	0	0	0	1	0	0	0	0	0	1	NULL	NULL	NULL	NULL	NULL	NULL	NULL	NULL	NULL	NULL	NULL	NULL	NULL	NULL	NULL	NULL	NULL	NULL	NULL	NULL	NULL
Anesthesia	Female	51	24.96	Lower GI	2021-09-24 13:08:45	2021-09-24 13:33:00	25	2021-09-24 13:22:00	11	2021-09-24 13:59:00	2021-09-24 14:01:34	2	2021-09-24 14:03:00	2021-09-24 14:50:00	53	47	0	0	0	0	0	1	0	0	0	0	0	1	NULL	NULL	NULL	NULL	NULL	NULL	NULL	NULL	NULL	NULL	NULL	NULL	NULL	NULL	NULL	NULL	NULL	NULL	NULL	NULL	NULL
Nursing	Male	60	24.46	Upper GI	2021-01-20 11:13:00	2021-01-20 11:30:00	17	2021-01-20 11:18:00	12	2021-01-20 11:35:00	2021-01-20 11:40:00	5	2021-01-20 11:44:00	2021-01-20 11:59:00	27	15	0	0	0	0	0	1	1	0	0	1	0	3	NULL	NULL	NULL	NULL	NULL	NULL	NULL	NULL	NULL	NULL	NULL	NULL	NULL	NULL	NULL	NULL	NULL	NULL	NULL	NULL	NULL
Nursing	Female	50	44.63	Lower GI	2020-02-26 10:30:20	2020-02-26 10:37:00	7	2020-02-26 10:30:00	7	2020-02-26 10:53:00	2020-02-26 10:55:00	2	2020-02-26 11:04:00	2020-02-26 11:41:00	25	37	1	1	0	1	0	1	0	0	0	0	0	4	NULL	NULL	NULL	NULL	NULL	NULL	NULL	NULL	NULL	NULL	NULL	NULL	NULL	NULL	NULL	NULL	NULL	NULL	NULL	NULL	NULL
Nursing	Male	44	29.45	Upper GI	2020-02-24 14:12:01	2020-02-24 14:39:00	27	2020-02-24 14:29:35	10	2020-02-24 14:43:00	2020-02-24 14:45:55	2	2020-02-24 14:54:00	2020-02-24 15:59:00	33	65	0	0	0	0	0	1	1	0	0	1	0	3	NULL	NULL	NULL	NULL	NULL	NULL	NULL	NULL	NULL	NULL	NULL	NULL	NULL	NULL	NULL	NULL	NULL	NULL	NULL	NULL	NULL
Nursing	Male	44	24.46	Lower GI	2020-03-16 14:53:35	2020-03-16 15:27:00	34	2020-03-16 15:17:47	10	2020-03-16 15:39:00	2020-03-16 15:42:08	3	2020-03-16 15:45:00	2020-03-16 16:22:00	49	37	0	0	0	0	0	1	1	0	0	1	0	3	NULL	NULL	NULL	NULL	NULL	NULL	NULL	NULL	NULL	NULL	NULL	NULL	NULL	NULL	NULL	NULL	NULL	NULL	NULL	NULL	NULL
Nursing	Female	57	30.36	Lower GI	2020-06-18 14:33:03	2020-06-18 14:48:00	15	2020-06-18 14:40:42	8	2020-06-18 15:00:00	2020-06-18 15:02:12	2	2020-06-18 15:06:00	2020-06-18 15:49:00	29	43	1	0	0	0	0	1	0	0	0	0	0	2	NULL	NULL	NULL	NULL	NULL	NULL	NULL	NULL	NULL	NULL	NULL	NULL	NULL	NULL	NULL	NULL	NULL	NULL	NULL	NULL	NULL
Nursing	Female	65	25.15	Lower GI	2020-10-19 08:06:56	2020-10-19 08:29:00	23	2020-10-19 08:20:10	9	2020-10-19 08:55:00	2020-10-19 08:58:41	3	2020-10-19 09:05:00	2020-10-19 09:26:00	52	21	1	0	0	0	0	0	0	0	0	0	0	1	NULL	NULL	NULL	NULL	NULL	NULL	NULL	NULL	NULL	NULL	NULL	NULL	NULL	NULL	NULL	NULL	NULL	NULL	NULL	NULL	NULL
Anesthesia	Female	68	26.31	Lower GI	2021-08-25 10:46:28	2021-08-25 10:48:00	2	2021-08-25 10:44:00	4	2021-08-25 11:18:00	2021-08-25 11:22:46	4	2021-08-25 11:30:00	2021-08-25 12:15:00	36	45	0	0	0	1	0	0	0	0	0	0	0	1	NULL	NULL	NULL	NULL	NULL	NULL	NULL	NULL	NULL	NULL	NULL	NULL	NULL	NULL	NULL	NULL	NULL	NULL	NULL	NULL	NULL
Anesthesia	Female	89	30.98	Upper GI	2021-09-13 11:52:00	2021-09-13 12:13:00	21	2021-09-13 12:05:00	8	2021-09-13 12:23:00	2021-09-13 12:28:52	5	2021-09-13 12:35:00	2021-09-13 13:00:00	36	25	0	1	0	1	0	1	1	0	0	1	1	6	NULL	NULL	NULL	NULL	NULL	NULL	NULL	NULL	NULL	NULL	NULL	NULL	NULL	NULL	NULL	NULL	NULL	NULL	NULL	NULL	NULL
Nursing	Female	61	23.3	Lower GI	2021-06-16 06:54:30	2021-06-16 07:02:00	8	2021-06-16 06:58:00	4	2021-06-16 07:18:00	2021-06-16 07:22:20	4	2021-06-16 07:26:00	2021-06-16 08:19:00	28	53	0	0	0	1	0	1	0	0	0	0	0	2	NULL	NULL	NULL	NULL	NULL	NULL	NULL	NULL	NULL	NULL	NULL	NULL	NULL	NULL	NULL	NULL	NULL	NULL	NULL	NULL	NULL
Anesthesia	Female	53	33.29	Lower GI	2021-08-25 07:36:00	2021-08-25 07:40:00	4	2021-08-25 07:31:00	9	2021-08-25 07:56:00	2021-08-25 08:00:13	4	2021-08-25 08:00:00	2021-08-25 08:39:00	24	39	0	0	0	0	0	0	0	0	0	0	0	0	NULL	NULL	NULL	NULL	NULL	NULL	NULL	NULL	NULL	NULL	NULL	NULL	NULL	NULL	NULL	NULL	NULL	NULL	NULL	NULL	NULL
Nursing	Male	73	29.53	Lower GI	2021-06-16 09:55:00	2021-06-16 10:09:00	14	2021-06-16 10:03:00	6	2021-06-16 10:29:00	2021-06-16 10:32:32	3	2021-06-16 10:36:00	2021-06-16 11:41:00	37	65	1	1	0	0	0	0	0	0	0	0	0	2	NULL	NULL	NULL	NULL	NULL	NULL	NULL	NULL	NULL	NULL	NULL	NULL	NULL	NULL	NULL	NULL	NULL	NULL	NULL	NULL	NULL
Nursing	Female	49	32.61	Upper GI	2020-02-18 09:00:53	2020-02-18 09:51:00	51	2020-02-18 09:45:37	6	2020-02-18 09:55:00	2020-02-18 10:00:00	5	2020-02-18 10:10:00	2020-02-18 11:10:00	60	60	0	0	0	0	0	0	0	1	0	0	0	1	NULL	NULL	NULL	NULL	NULL	NULL	NULL	NULL	NULL	NULL	NULL	NULL	NULL	NULL	NULL	NULL	NULL	NULL	NULL	NULL	NULL
Nursing	Male	32	26.62	Lower GI	2021-02-09 13:30:00	2021-02-09 14:10:00	40	2021-02-05 13:16:00	5814	2021-02-09 14:25:00	2021-02-09 14:30:05	5	2021-02-09 07:41:00	2021-02-09 15:23:00	60	462	NULL	NULL	NULL	NULL	NULL	NULL	NULL	NULL	NULL	NULL	NULL	0	4	mg	NULL	NULL	5	mg	NULL	NULL	1	mg	200	mcg	NULL	NULL	NULL	NULL	NULL	NULL	NULL	NULL	NULL
Nursing	Male	71	29.53	DUAL	2020-01-06 07:58:01	2020-01-06 08:10:00	12	2020-01-06 08:01:47	9	2020-01-06 08:43:00	2020-01-06 08:45:03	2	2020-01-06 08:51:00	2020-01-06 09:04:00	47	13	0	0	0	0	0	0	0	1	0	0	0	1	NULL	NULL	NULL	NULL	NULL	NULL	NULL	NULL	NULL	NULL	NULL	NULL	NULL	NULL	NULL	NULL	NULL	NULL	NULL	NULL	NULL
Nursing	Male	59	22.45	Upper GI	2020-10-07 08:57:51	2020-10-07 09:28:00	31	2020-10-07 09:21:02	7	2020-10-07 09:34:00	2020-10-07 09:37:09	3	2020-10-07 09:41:00	2020-10-07 10:56:00	40	75	0	1	0	1	0	1	1	1	0	1	0	6	NULL	NULL	NULL	NULL	NULL	NULL	NULL	NULL	NULL	NULL	NULL	NULL	NULL	NULL	NULL	NULL	NULL	NULL	NULL	NULL	NULL
Anesthesia	Male	60	22.89	Upper GI	2021-10-06 08:57:32	2021-10-06 09:05:00	8	2021-10-06 08:56:00	9	2021-10-06 09:09:00	2021-10-06 09:12:20	3	2021-10-06 09:17:00	2021-10-06 09:33:00	15	16	0	1	0	1	0	1	1	1	0	1	0	6	NULL	NULL	NULL	NULL	NULL	NULL	NULL	NULL	NULL	NULL	NULL	NULL	NULL	NULL	NULL	NULL	NULL	NULL	NULL	NULL	NULL
Nursing	Male	49	30.86	Upper GI	2021-02-02 09:44:23	2021-02-02 10:33:00	49	2021-02-02 10:25:44	8	2021-02-02 10:44:00	2021-02-02 10:47:00	3	2021-02-02 10:45:00	2021-02-02 12:00:00	63	75	0	0	0	0	0	1	0	0	0	0	0	1	NULL	NULL	NULL	NULL	NULL	NULL	NULL	NULL	NULL	NULL	NULL	NULL	NULL	NULL	NULL	NULL	NULL	NULL	NULL	NULL	NULL
Nursing	Female	72	22.67	Lower GI	2021-05-06 11:41:58	2021-05-06 12:21:00	40	2021-05-06 12:11:00	10	2021-05-06 12:40:00	2021-05-06 12:42:37	2	2021-05-06 12:45:00	2021-05-06 13:20:00	61	35	NULL	NULL	NULL	NULL	NULL	NULL	NULL	NULL	NULL	NULL	NULL	0	NULL	NULL	NULL	NULL	NULL	NULL	NULL	NULL	NULL	NULL	NULL	NULL	NULL	NULL	NULL	NULL	NULL	NULL	NULL	NULL	NULL
Nursing	Male	65	24.83	Lower GI	2021-04-16 08:24:20	2021-04-16 08:58:00	34	2021-04-16 08:51:00	7	2021-04-16 09:13:00	2021-04-16 09:16:04	3	2021-04-16 09:21:00	2021-04-16 09:55:00	52	34	0	0	0	0	0	1	1	0	0	1	0	3	NULL	NULL	NULL	NULL	NULL	NULL	NULL	NULL	NULL	NULL	NULL	NULL	NULL	NULL	NULL	NULL	NULL	NULL	NULL	NULL	NULL
Nursing	Female	73	30.04	Lower GI	2020-07-29 13:21:41	2020-07-29 14:00:00	39	2020-07-29 13:51:11	9	2020-07-29 14:37:00	2020-07-29 14:42:10	5	2020-07-29 14:47:00	2020-07-29 16:07:00	81	80	NULL	NULL	NULL	NULL	NULL	NULL	NULL	NULL	NULL	NULL	NULL	0	NULL	NULL	NULL	NULL	NULL	NULL	NULL	NULL	NULL	NULL	NULL	NULL	NULL	NULL	NULL	NULL	NULL	NULL	NULL	NULL	NULL
Nursing	Female	69	22.67	Upper GI	2020-09-22 10:38:17	2020-09-22 11:13:00	35	2020-09-22 11:05:34	8	2020-09-22 11:28:00	2020-09-22 11:31:47	3	2020-09-22 11:30:00	2020-09-22 12:00:00	53	30	0	0	0	1	0	1	0	0	0	0	0	2	NULL	NULL	NULL	NULL	NULL	NULL	NULL	NULL	NULL	NULL	NULL	NULL	NULL	NULL	NULL	NULL	NULL	NULL	NULL	NULL	NULL
Nursing	Female	25	22.47	Lower GI	2020-02-25 15:52:28	2020-02-25 16:13:00	21	2020-02-25 15:54:00	19	2020-02-25 16:31:00	2020-02-25 16:35:02	4	2020-02-25 16:39:00	2020-02-25 17:52:00	43	73	NULL	NULL	NULL	NULL	NULL	NULL	NULL	NULL	NULL	NULL	NULL	0	NULL	NULL	NULL	NULL	NULL	NULL	NULL	NULL	NULL	NULL	NULL	NULL	NULL	NULL	NULL	NULL	NULL	NULL	NULL	NULL	NULL
Nursing	Female	69	28.53	Lower GI	2020-10-05 10:31:11	2020-10-05 10:46:00	15	2020-10-05 10:38:04	8	2020-10-05 11:05:00	2020-10-05 11:09:12	4	2020-10-05 11:15:00	2020-10-05 12:15:00	38	60	1	0	0	0	0	1	0	0	0	0	0	2	NULL	NULL	NULL	NULL	NULL	NULL	NULL	NULL	NULL	NULL	NULL	NULL	NULL	NULL	NULL	NULL	NULL	NULL	NULL	NULL	NULL
Nursing	Female	72	18.66	Upper GI	2021-04-01 08:00:14	2021-04-01 08:43:00	43	2021-04-01 08:36:00	7	2021-04-01 08:58:00	2021-04-01 09:01:54	3	2021-04-01 09:07:00	2021-04-01 09:47:00	61	40	0	0	0	0	1	1	1	1	0	1	0	5	NULL	NULL	NULL	NULL	NULL	NULL	NULL	NULL	NULL	NULL	NULL	NULL	NULL	NULL	NULL	NULL	NULL	NULL	NULL	NULL	NULL
Nursing	Female	68	24.69	Lower GI	2020-07-27 08:27:38	2020-07-27 08:41:00	14	2020-07-27 08:37:12	4	2020-07-27 08:55:00	2020-07-27 08:59:48	4	2020-07-27 09:05:00	2020-07-27 09:31:00	32	26	0	0	0	1	0	1	1	0	0	1	0	4	NULL	NULL	NULL	NULL	NULL	NULL	NULL	NULL	NULL	NULL	NULL	NULL	NULL	NULL	NULL	NULL	NULL	NULL	NULL	NULL	NULL
Nursing	Female	50	NULL	Lower GI	2020-06-04 11:28:14	2020-06-04 11:51:00	23	2020-06-04 11:40:50	11	2020-06-04 12:13:00	2020-06-04 12:14:49	1	2020-06-04 12:22:00	2020-06-04 12:58:00	46	36	0	0	0	1	0	1	0	0	0	0	0	2	NULL	NULL	NULL	NULL	NULL	NULL	NULL	NULL	NULL	NULL	NULL	NULL	NULL	NULL	NULL	NULL	NULL	NULL	NULL	NULL	NULL
Nursing	Male	57	27.12	DUAL	2021-03-10 09:28:49	2021-03-10 09:42:00	14	2021-03-10 09:36:14	6	2021-03-10 10:13:00	2021-03-10 10:20:18	7	2021-03-10 10:25:00	2021-03-10 11:09:00	52	44	0	0	0	0	0	1	1	0	0	1	0	3	NULL	NULL	NULL	NULL	NULL	NULL	NULL	NULL	NULL	NULL	NULL	NULL	NULL	NULL	NULL	NULL	NULL	NULL	NULL	NULL	NULL
Nursing	Male	59	24.41	Lower GI	2020-06-05 08:48:01	2020-06-05 09:07:00	19	2020-06-05 08:58:55	9	2020-06-05 09:43:00	2020-06-05 09:48:33	5	2020-06-05 09:52:00	2020-06-05 10:32:00	60	40	1	0	0	0	0	0	0	0	0	0	0	1	NULL	NULL	NULL	NULL	NULL	NULL	NULL	NULL	NULL	NULL	NULL	NULL	NULL	NULL	NULL	NULL	NULL	NULL	NULL	NULL	NULL
Nursing	Female	55	25.34	Lower GI	2020-05-06 10:41:18	2020-05-06 11:06:00	25	2020-05-06 10:58:21	8	2020-05-06 11:24:00	2020-05-06 11:33:25	9	2020-05-06 11:30:00	2020-05-06 12:07:00	52	37	NULL	NULL	NULL	NULL	NULL	NULL	NULL	NULL	NULL	NULL	NULL	0	NULL	NULL	NULL	NULL	NULL	NULL	NULL	NULL	NULL	NULL	NULL	NULL	NULL	NULL	NULL	NULL	NULL	NULL	NULL	NULL	NULL
Anesthesia	Female	60	19.8	Lower GI	2021-10-12 15:08:14	2021-10-12 15:14:00	6	2021-10-12 15:07:00	7	2021-10-12 15:43:00	2021-10-12 15:46:36	3	2021-10-12 15:54:00	2021-10-12 16:40:00	38	46	NULL	NULL	NULL	NULL	NULL	NULL	NULL	NULL	NULL	NULL	NULL	0	NULL	NULL	NULL	NULL	NULL	NULL	NULL	NULL	NULL	NULL	NULL	NULL	NULL	NULL	NULL	NULL	NULL	NULL	NULL	NULL	NULL
Nursing	Female	50	23.56	Upper GI	2020-02-13 13:06:05	2020-02-13 13:59:00	53	2020-02-13 13:45:22	14	2020-02-13 14:07:00	2020-02-13 14:09:04	2	2020-02-13 14:15:00	2020-02-13 16:06:00	63	111	0	0	0	1	0	1	1	1	0	1	0	5	4	mg	NULL	NULL	NULL	NULL	NULL	NULL	NULL	NULL	NULL	NULL	NULL	NULL	NULL	NULL	NULL	NULL	NULL	NULL	NULL
Nursing	Male	64	NULL	Lower GI	2020-02-12 14:03:08	2020-02-12 14:46:00	43	2020-02-12 14:35:46	11	2020-02-12 15:05:00	2020-02-12 15:08:04	3	2020-02-12 15:10:00	2020-02-12 15:53:00	65	43	NULL	NULL	NULL	NULL	NULL	NULL	NULL	NULL	NULL	NULL	NULL	0	NULL	NULL	NULL	NULL	NULL	NULL	NULL	NULL	NULL	NULL	NULL	NULL	NULL	NULL	NULL	NULL	NULL	NULL	NULL	NULL	NULL
Nursing	Female	51	27.46	Lower GI	2020-11-12 07:34:59	2020-11-12 07:52:00	18	2020-11-12 07:38:36	14	2020-11-12 08:26:00	2020-11-12 08:30:08	4	2020-11-12 08:34:00	2020-11-12 09:02:00	56	28	0	0	0	1	0	0	0	0	0	0	0	1	NULL	NULL	NULL	NULL	NULL	NULL	NULL	NULL	NULL	NULL	NULL	NULL	NULL	NULL	NULL	NULL	NULL	NULL	NULL	NULL	NULL
Nursing	Female	48	22.43	Lower GI	2020-07-27 14:54:55	2020-07-27 15:15:00	21	2020-07-27 15:07:00	8	2020-07-27 15:27:00	2020-07-27 15:29:37	2	2020-07-27 15:39:00	2020-07-27 16:44:00	35	65	0	0	0	1	0	1	1	1	0	1	0	5	NULL	NULL	NULL	NULL	NULL	NULL	NULL	NULL	NULL	NULL	NULL	NULL	NULL	NULL	NULL	NULL	NULL	NULL	NULL	NULL	NULL
Nursing	Male	64	20.92	Lower GI	2020-12-07 08:55:42	2020-12-07 09:28:00	33	2020-12-07 09:17:00	11	2020-12-07 09:47:00	2020-12-07 09:49:53	2	2020-12-07 09:55:00	2020-12-07 10:10:00	54	15	0	0	1	0	0	1	0	0	0	0	1	3	NULL	NULL	NULL	NULL	NULL	NULL	NULL	NULL	NULL	NULL	NULL	NULL	NULL	NULL	NULL	NULL	NULL	NULL	NULL	NULL	NULL
Anesthesia	Female	75	40	Lower GI	2021-10-06 10:12:21	2021-10-06 10:25:00	13	2021-10-06 10:10:00	15	2021-10-06 10:47:00	2021-10-06 10:50:17	3	2021-10-06 10:56:00	2021-10-06 11:46:00	38	50	0	0	0	0	0	1	0	1	0	0	0	2	NULL	NULL	NULL	NULL	NULL	NULL	NULL	NULL	NULL	NULL	NULL	NULL	NULL	NULL	NULL	NULL	NULL	NULL	NULL	NULL	NULL
Anesthesia	Male	73	29.94	Lower GI	2021-10-11 14:23:00	2021-10-11 14:28:00	5	2021-10-11 14:23:00	5	2021-10-11 14:51:00	2021-10-11 14:52:00	1	2021-10-11 15:00:00	2021-10-11 15:27:00	29	27	0	0	0	1	0	1	0	1	0	0	0	3	NULL	NULL	NULL	NULL	NULL	NULL	NULL	NULL	NULL	NULL	NULL	NULL	NULL	NULL	NULL	NULL	NULL	NULL	NULL	NULL	NULL
Nursing	Female	43	33.41	Upper GI	2021-03-25 08:05:04	2021-03-25 08:30:00	25	2021-03-25 08:18:00	12	2021-03-25 08:50:00	2021-03-25 08:52:48	2	2021-03-25 08:57:00	2021-03-25 10:11:00	47	74	NULL	NULL	NULL	NULL	NULL	NULL	NULL	NULL	NULL	NULL	NULL	0	NULL	NULL	NULL	NULL	NULL	NULL	NULL	NULL	NULL	NULL	NULL	NULL	NULL	NULL	NULL	NULL	NULL	NULL	NULL	NULL	NULL
Nursing	Male	55	29.05	Lower GI	2020-02-11 08:42:48	2020-02-11 09:56:00	74	2020-02-11 09:47:08	9	2020-02-11 10:24:00	2020-02-11 10:28:51	4	2020-02-11 10:35:00	2020-02-11 11:00:00	106	25	NULL	NULL	NULL	NULL	NULL	NULL	NULL	NULL	NULL	NULL	NULL	0	NULL	NULL	NULL	NULL	NULL	NULL	NULL	NULL	NULL	NULL	NULL	NULL	NULL	NULL	NULL	NULL	NULL	NULL	NULL	NULL	NULL
Nursing	Male	74	22.92	Upper GI	2020-07-21 10:34:19	2020-07-21 11:06:00	32	2020-07-21 10:58:04	8	2020-07-21 11:16:00	2020-07-21 11:22:04	6	2020-07-21 11:30:00	2020-07-21 12:00:00	48	30	0	0	0	1	0	0	0	0	0	0	0	1	NULL	NULL	NULL	NULL	NULL	NULL	NULL	NULL	NULL	NULL	NULL	NULL	NULL	NULL	NULL	NULL	NULL	NULL	NULL	NULL	NULL
Nursing	Male	62	35.75	DUAL	2020-05-11 08:04:46	2020-05-11 08:13:00	9	2020-05-11 08:05:56	8	2020-05-11 09:07:00	2020-05-11 09:12:03	5	2020-05-11 09:15:00	2020-05-11 10:10:00	68	55	0	0	0	1	0	0	0	0	0	0	0	1	NULL	NULL	NULL	NULL	NULL	NULL	NULL	NULL	NULL	NULL	NULL	NULL	NULL	NULL	NULL	NULL	NULL	NULL	NULL	NULL	NULL
Nursing	Male	62	34.04	Lower GI	2020-11-02 12:04:00	2020-11-02 12:24:00	20	2020-11-02 12:12:00	12	2020-11-02 12:44:00	2020-11-02 12:46:02	2	2020-11-02 12:53:00	2020-11-02 13:20:00	42	27	0	0	0	1	0	0	0	0	0	0	0	1	NULL	NULL	NULL	NULL	NULL	NULL	NULL	NULL	NULL	NULL	NULL	NULL	NULL	NULL	NULL	NULL	NULL	NULL	NULL	NULL	NULL
Anesthesia	Female	58	27.7	Lower GI	2021-08-18 10:21:04	2021-08-18 10:56:00	35	2021-08-18 10:47:00	9	2021-08-18 11:11:00	2021-08-18 11:14:10	3	2021-08-18 11:22:00	2021-08-18 12:30:00	53	68	0	0	0	1	0	0	0	0	0	0	0	1	NULL	NULL	NULL	NULL	NULL	NULL	NULL	NULL	NULL	NULL	NULL	NULL	NULL	NULL	NULL	NULL	NULL	NULL	NULL	NULL	NULL
Nursing	Male	78	26.46	DUAL	2020-09-02 10:53:41	2020-09-02 11:10:00	17	2020-09-02 11:06:15	4	2020-09-02 11:59:00	2020-09-02 12:00:55	1	2020-09-02 12:11:00	2020-09-02 13:11:00	67	60	0	0	0	1	0	1	0	0	0	0	0	2	NULL	NULL	NULL	NULL	NULL	NULL	NULL	NULL	NULL	NULL	NULL	NULL	NULL	NULL	NULL	NULL	NULL	NULL	NULL	NULL	NULL
Nursing	Female	47	25.84	Lower GI	2021-03-19 08:59:35	2021-03-19 09:12:00	13	2021-03-19 09:03:00	9	2021-03-19 09:30:00	2021-03-19 09:33:00	3	2021-03-19 09:38:00	2021-03-19 10:04:00	34	26	0	0	0	1	0	0	0	0	0	0	0	1	NULL	NULL	NULL	NULL	NULL	NULL	NULL	NULL	NULL	NULL	NULL	NULL	NULL	NULL	NULL	NULL	NULL	NULL	NULL	NULL	NULL
Nursing	Female	61	26.09	Lower GI	2020-08-04 09:10:00	2020-08-04 09:18:00	8	2020-08-04 09:11:00	7	2020-08-04 09:44:00	2020-08-04 09:48:04	4	2020-08-04 10:00:00	2020-08-04 11:00:00	38	60	NULL	NULL	NULL	NULL	NULL	NULL	NULL	NULL	NULL	NULL	NULL	0	NULL	NULL	NULL	NULL	NULL	NULL	NULL	NULL	NULL	NULL	NULL	NULL	NULL	NULL	NULL	NULL	NULL	NULL	NULL	NULL	NULL
Nursing	Female	25	33.28	Lower GI	2020-01-02 08:28:49	2020-01-02 09:11:00	43	2020-01-02 09:05:39	6	2020-01-02 09:20:00	2020-01-02 09:39:30	19	2020-01-02 09:29:00	2020-01-02 09:54:00	71	25	NULL	NULL	NULL	NULL	NULL	NULL	NULL	NULL	NULL	NULL	NULL	0	NULL	NULL	NULL	NULL	NULL	NULL	NULL	NULL	NULL	NULL	NULL	NULL	NULL	NULL	NULL	NULL	NULL	NULL	NULL	NULL	NULL
Nursing	Female	64	25.84	Lower GI	2020-03-06 11:03:12	2020-03-06 11:15:00	12	2020-03-06 11:07:00	8	2020-03-06 11:42:00	2020-03-06 11:45:00	3	2020-03-06 11:50:00	2020-03-06 12:30:00	42	40	0	0	0	0	0	0	0	0	0	0	0	0	NULL	NULL	NULL	NULL	NULL	NULL	NULL	NULL	NULL	NULL	NULL	NULL	NULL	NULL	NULL	NULL	NULL	NULL	NULL	NULL	NULL
Nursing	Female	47	35.15	DUAL	2021-02-11 09:27:37	2021-02-11 10:34:00	67	2021-02-11 10:28:00	6	2021-02-11 11:12:00	2021-02-11 11:14:06	2	2021-02-11 11:20:00	2021-02-11 12:30:00	107	70	NULL	NULL	NULL	NULL	NULL	NULL	NULL	NULL	NULL	NULL	NULL	0	NULL	NULL	NULL	NULL	NULL	NULL	NULL	NULL	NULL	NULL	NULL	NULL	NULL	NULL	NULL	NULL	NULL	NULL	NULL	NULL	NULL
Anesthesia	Male	56	33.45	Lower GI	2021-10-22 11:57:02	2021-10-22 13:14:00	77	2021-10-22 13:04:00	10	2021-10-22 13:35:00	2021-10-22 13:38:33	3	2021-10-22 13:40:00	2021-10-22 14:43:00	101	63	0	1	0	0	0	1	0	0	0	0	0	2	NULL	NULL	NULL	NULL	NULL	NULL	NULL	NULL	NULL	NULL	NULL	NULL	NULL	NULL	NULL	NULL	NULL	NULL	NULL	NULL	NULL
Nursing	Female	47	26.02	Lower GI	2020-02-05 13:42:42	2020-02-05 14:15:00	33	2020-02-05 14:08:00	7	2020-02-05 14:32:00	2020-02-05 14:37:48	5	2020-02-05 14:45:00	2020-02-05 15:28:00	55	43	NULL	NULL	NULL	NULL	NULL	NULL	NULL	NULL	NULL	NULL	NULL	0	NULL	NULL	NULL	NULL	NULL	NULL	NULL	NULL	NULL	NULL	NULL	NULL	NULL	NULL	NULL	NULL	NULL	NULL	NULL	NULL	NULL
Nursing	Female	49	38.41	Lower GI	2021-04-19 10:13:01	2021-04-19 11:12:00	59	2021-04-19 11:01:32	11	2021-04-19 11:40:00	2021-04-19 11:50:02	10	2021-04-19 12:06:00	2021-04-19 12:39:00	97	33	0	0	0	1	0	0	0	1	0	0	0	2	NULL	NULL	NULL	NULL	NULL	NULL	NULL	NULL	NULL	NULL	NULL	NULL	NULL	NULL	NULL	NULL	NULL	NULL	NULL	NULL	NULL
Nursing	Male	65	21.3	Lower GI	2021-05-12 13:46:36	2021-05-12 14:10:00	24	2021-05-12 14:05:00	5	2021-05-12 14:29:00	2021-05-12 14:32:16	3	2021-05-12 14:39:00	2021-05-12 15:26:00	46	47	0	0	1	0	0	1	0	0	0	0	0	2	NULL	NULL	NULL	NULL	NULL	NULL	NULL	NULL	NULL	NULL	NULL	NULL	NULL	NULL	NULL	NULL	NULL	NULL	NULL	NULL	NULL
Nursing	Female	51	24.45	Upper GI	2020-05-28 13:17:01	2020-05-28 13:47:00	30	2020-05-28 13:38:37	9	2020-05-28 13:50:00	2020-05-28 13:53:35	3	2020-05-28 13:58:00	2020-05-28 14:47:00	36	49	0	0	0	1	0	0	0	1	0	0	0	2	NULL	NULL	NULL	NULL	NULL	NULL	NULL	NULL	NULL	NULL	NULL	NULL	NULL	NULL	NULL	NULL	NULL	NULL	NULL	NULL	NULL
Nursing	Female	70	35.87	Lower GI	2021-02-01 13:38:53	2021-02-01 13:51:00	13	2021-02-01 13:43:45	8	2021-02-01 14:12:00	2021-02-01 14:19:09	7	2021-02-01 14:24:00	2021-02-01 15:40:00	41	76	1	0	0	1	0	1	0	0	0	0	1	4	NULL	NULL	NULL	NULL	NULL	NULL	NULL	NULL	NULL	NULL	NULL	NULL	NULL	NULL	NULL	NULL	NULL	NULL	NULL	NULL	NULL
Nursing	Female	68	20.49	Lower GI	2021-04-28 08:31:47	2021-04-28 09:13:00	42	2021-04-28 09:03:00	10	2021-04-28 09:27:00	2021-04-28 09:29:08	2	2021-04-28 09:34:00	2021-04-28 10:04:00	58	30	0	0	1	1	0	1	1	0	1	1	1	7	NULL	NULL	NULL	NULL	NULL	NULL	NULL	NULL	NULL	NULL	NULL	NULL	NULL	NULL	NULL	NULL	NULL	NULL	NULL	NULL	NULL
Nursing	Female	58	26.75	Lower GI	2021-04-16 08:58:36	2021-04-16 09:09:00	11	2021-04-16 09:02:07	7	2021-04-16 09:37:00	2021-04-16 09:43:05	6	2021-04-16 09:48:00	2021-04-16 11:07:00	45	79	1	0	0	1	0	0	0	0	0	0	0	2	NULL	NULL	NULL	NULL	NULL	NULL	NULL	NULL	NULL	NULL	NULL	NULL	NULL	NULL	NULL	NULL	NULL	NULL	NULL	NULL	NULL
Nursing	Female	48	34.18	Lower GI	2020-10-28 13:21:06	2020-10-28 13:46:00	25	2020-10-28 13:38:47	8	2020-10-28 13:57:00	2020-10-28 14:00:31	3	2020-10-28 14:08:00	2020-10-28 14:58:00	39	50	0	0	0	0	0	1	0	0	0	0	0	1	NULL	NULL	NULL	NULL	NULL	NULL	NULL	NULL	NULL	NULL	NULL	NULL	NULL	NULL	NULL	NULL	NULL	NULL	NULL	NULL	NULL
Nursing	Male	57	33.97	Lower GI	2020-03-13 11:36:06	2020-03-13 11:50:00	14	2020-03-13 11:44:22	6	2020-03-13 12:21:00	2020-03-13 12:24:01	3	2020-03-13 12:26:00	2020-03-13 13:05:00	48	39	NULL	NULL	NULL	NULL	NULL	NULL	NULL	NULL	NULL	NULL	NULL	0	NULL	NULL	NULL	NULL	NULL	NULL	NULL	NULL	NULL	NULL	NULL	NULL	NULL	NULL	NULL	NULL	NULL	NULL	NULL	NULL	NULL
Nursing	Female	61	24.96	Upper GI	2020-09-02 08:18:14	2020-09-02 08:44:00	26	2020-09-02 08:35:45	9	2020-09-02 08:49:00	2020-09-02 08:52:50	3	2020-09-02 08:57:00	2020-09-02 09:58:00	34	61	0	1	0	0	0	0	0	1	0	0	0	2	NULL	NULL	NULL	NULL	NULL	NULL	NULL	NULL	NULL	NULL	NULL	NULL	NULL	NULL	NULL	NULL	NULL	NULL	NULL	NULL	NULL
Nursing	Female	66	24.14	Lower GI	2020-10-28 09:21:59	2020-10-28 09:37:00	16	2020-10-28 09:30:33	7	2020-10-28 09:59:00	2020-10-28 10:02:43	3	2020-10-28 10:07:00	2020-10-28 10:47:00	41	40	NULL	NULL	NULL	NULL	NULL	NULL	NULL	NULL	NULL	NULL	NULL	0	NULL	NULL	NULL	NULL	NULL	NULL	NULL	NULL	NULL	NULL	NULL	NULL	NULL	NULL	NULL	NULL	NULL	NULL	NULL	NULL	NULL
Anesthesia	Female	78	33.66	Upper GI	2021-09-15 15:29:00	2021-09-15 15:39:00	10	2021-09-15 15:29:00	10	2021-09-15 15:47:00	2021-09-15 15:58:24	11	2021-09-15 16:00:00	2021-09-15 16:45:00	29	45	1	1	1	0	0	1	0	0	0	0	0	4	NULL	NULL	NULL	NULL	NULL	NULL	NULL	NULL	NULL	NULL	NULL	NULL	NULL	NULL	NULL	NULL	NULL	NULL	NULL	NULL	NULL
Anesthesia	Female	65	22.31	DUAL	2021-10-15 15:45:45	2021-10-15 15:48:00	3	2021-10-15 15:42:00	6	2021-10-15 16:13:00	2021-10-15 16:18:44	5	2021-10-15 16:25:00	2021-10-15 17:15:00	33	50	NULL	NULL	NULL	NULL	NULL	NULL	NULL	NULL	NULL	NULL	NULL	0	NULL	NULL	NULL	NULL	NULL	NULL	NULL	NULL	NULL	NULL	NULL	NULL	NULL	NULL	NULL	NULL	NULL	NULL	NULL	NULL	NULL
Nursing	Female	71	30.11	DUAL	2021-03-29 10:07:18	2021-03-29 10:23:00	16	2021-03-29 10:15:16	8	2021-03-29 10:53:00	2021-03-29 11:00:05	7	2021-03-29 11:00:00	2021-03-29 12:13:00	53	73	1	0	0	1	0	1	0	0	0	0	0	3	NULL	NULL	NULL	NULL	NULL	NULL	NULL	NULL	NULL	NULL	NULL	NULL	NULL	NULL	NULL	NULL	NULL	NULL	NULL	NULL	NULL
Nursing	Male	55	26.5	DUAL	2021-03-03 14:21:51	2021-03-03 14:38:00	17	2021-03-03 14:25:44	13	2021-03-03 15:06:00	2021-03-03 15:08:57	2	2021-03-03 15:15:00	2021-03-03 16:14:00	47	59	0	1	0	1	0	0	0	0	0	0	0	2	NULL	NULL	NULL	NULL	NULL	NULL	NULL	NULL	NULL	NULL	NULL	NULL	NULL	NULL	NULL	NULL	NULL	NULL	NULL	NULL	NULL
Nursing	Male	57	21.08	Lower GI	2020-08-24 13:35:00	2020-08-24 13:57:00	22	2020-08-24 13:45:00	12	2020-08-24 14:19:00	2020-08-24 14:23:46	4	2020-08-24 14:24:00	2020-08-24 15:04:00	48	40	0	0	0	0	0	0	0	0	0	0	0	0	NULL	NULL	NULL	NULL	NULL	NULL	NULL	NULL	NULL	NULL	NULL	NULL	NULL	NULL	NULL	NULL	NULL	NULL	NULL	NULL	NULL
Nursing	Male	82	24.28	Lower GI	2021-05-10 14:50:16	2021-05-10 15:04:00	14	2021-05-10 14:56:00	8	2021-05-10 15:15:00	2021-05-10 15:16:59	1	2021-05-10 15:24:00	2021-05-10 16:19:00	26	55	NULL	NULL	NULL	NULL	NULL	NULL	NULL	NULL	NULL	NULL	NULL	0	NULL	NULL	NULL	NULL	NULL	NULL	NULL	NULL	NULL	NULL	NULL	NULL	NULL	NULL	NULL	NULL	NULL	NULL	NULL	NULL	NULL
Nursing	Male	80	25.5	DUAL	2020-01-28 10:17:45	2020-01-28 11:17:00	60	2020-01-28 11:08:54	9	2020-01-28 11:47:00	2020-01-28 11:50:31	3	2020-01-28 12:00:00	2020-01-28 12:54:00	93	54	0	1	0	0	0	1	0	0	0	0	0	2	NULL	NULL	NULL	NULL	NULL	NULL	NULL	NULL	NULL	NULL	NULL	NULL	NULL	NULL	NULL	NULL	NULL	NULL	NULL	NULL	NULL
Nursing	Female	58	34.57	Upper GI	2021-04-27 08:39:41	2021-04-27 10:52:00	133	2021-04-27 10:38:50	14	2021-04-27 11:00:00	2021-04-27 11:03:27	3	2021-04-27 11:08:00	2021-04-27 11:36:00	144	28	0	0	0	1	0	1	0	0	0	0	0	2	NULL	NULL	NULL	NULL	NULL	NULL	NULL	NULL	NULL	NULL	NULL	NULL	NULL	NULL	NULL	NULL	NULL	NULL	NULL	NULL	NULL
Nursing	Female	78	27.46	Lower GI	2020-08-11 10:28:16	2020-08-11 10:47:00	19	2020-08-11 10:40:00	7	2020-08-11 11:15:00	2020-08-11 11:18:00	3	2020-08-11 11:20:00	2020-08-11 12:18:00	50	58	0	0	1	1	0	1	1	0	0	1	0	5	NULL	NULL	NULL	NULL	NULL	NULL	NULL	NULL	NULL	NULL	NULL	NULL	NULL	NULL	NULL	NULL	NULL	NULL	NULL	NULL	NULL
Nursing	Male	58	22.71	Upper GI	2020-01-13 13:26:27	2020-01-13 14:09:00	43	2020-01-13 13:54:42	15	2020-01-13 14:12:00	2020-01-13 14:16:28	4	2020-01-13 14:21:00	2020-01-13 15:02:00	50	41	0	0	0	0	0	1	1	1	0	1	0	4	NULL	NULL	NULL	NULL	NULL	NULL	NULL	NULL	NULL	NULL	NULL	NULL	NULL	NULL	NULL	NULL	NULL	NULL	NULL	NULL	NULL
Nursing	Female	48	23.17	Lower GI	2020-02-11 08:39:18	2020-02-11 09:06:00	27	2020-02-11 08:59:40	7	2020-02-11 09:24:00	2020-02-11 09:28:02	4	2020-02-11 09:31:00	2020-02-11 09:44:00	49	13	0	1	0	0	0	1	0	0	0	0	0	2	NULL	NULL	NULL	NULL	NULL	NULL	NULL	NULL	NULL	NULL	NULL	NULL	NULL	NULL	NULL	NULL	NULL	NULL	NULL	NULL	NULL
Nursing	Male	72	28.29	Lower GI	2021-05-17 10:22:31	2021-05-17 10:38:00	16	2021-05-17 10:32:26	6	2021-05-17 10:55:00	2021-05-17 10:58:16	3	2021-05-17 11:05:00	2021-05-17 11:30:00	36	25	NULL	NULL	NULL	NULL	NULL	NULL	NULL	NULL	NULL	NULL	NULL	0	NULL	NULL	NULL	NULL	NULL	NULL	NULL	NULL	NULL	NULL	NULL	NULL	NULL	NULL	NULL	NULL	NULL	NULL	NULL	NULL	NULL
Nursing	Female	58	16.97	Lower GI	2020-02-05 09:20:05	2020-02-05 09:55:00	35	2020-02-05 09:49:51	6	2020-02-05 10:14:00	2020-02-05 10:17:17	3	2020-02-05 10:20:00	2020-02-05 10:58:00	57	38	NULL	NULL	NULL	NULL	NULL	NULL	NULL	NULL	NULL	NULL	NULL	0	NULL	NULL	NULL	NULL	NULL	NULL	NULL	NULL	NULL	NULL	NULL	NULL	NULL	NULL	NULL	NULL	NULL	NULL	NULL	NULL	NULL
Nursing	Male	72	25.06	Lower GI	2021-06-21 13:30:52	2021-06-21 13:41:00	11	2021-06-21 13:31:00	10	2021-06-21 14:00:00	2021-06-21 14:02:47	2	2021-06-21 14:07:00	2021-06-21 14:23:00	32	16	0	0	0	0	0	1	0	0	0	0	0	1	NULL	NULL	NULL	NULL	NULL	NULL	NULL	NULL	NULL	NULL	NULL	NULL	NULL	NULL	NULL	NULL	NULL	NULL	NULL	NULL	NULL
Nursing	Female	48	34.33	Upper GI	2020-07-07 08:38:53	2020-07-07 09:27:00	49	2020-07-07 09:23:15	4	2020-07-07 09:33:00	2020-07-07 09:38:07	5	2020-07-07 09:43:00	2020-07-07 09:56:00	60	13	0	0	0	1	0	1	0	1	0	0	0	3	NULL	NULL	NULL	NULL	NULL	NULL	NULL	NULL	NULL	NULL	NULL	NULL	NULL	NULL	NULL	NULL	NULL	NULL	NULL	NULL	NULL
Nursing	Male	65	34.95	Lower GI	2021-02-25 09:06:45	2021-02-25 09:41:00	35	2021-02-25 09:31:00	10	2021-02-25 09:59:00	2021-02-25 10:02:12	3	2021-02-25 10:07:00	2021-02-25 11:00:00	56	53	0	0	0	0	0	1	0	0	0	0	0	1	NULL	NULL	NULL	NULL	NULL	NULL	NULL	NULL	NULL	NULL	NULL	NULL	NULL	NULL	NULL	NULL	NULL	NULL	NULL	NULL	NULL
Nursing	Male	25	21.14	DUAL	2020-01-09 07:47:00	2020-01-09 08:04:00	17	2020-01-09 07:55:00	9	2020-01-09 08:38:00	2020-01-09 08:41:23	3	2020-01-09 08:45:00	2020-01-09 10:04:00	54	79	NULL	NULL	NULL	NULL	NULL	NULL	NULL	NULL	NULL	NULL	NULL	0	NULL	NULL	NULL	NULL	NULL	NULL	NULL	NULL	NULL	NULL	NULL	NULL	NULL	NULL	NULL	NULL	NULL	NULL	NULL	NULL	NULL
Nursing	Female	61	25.97	Lower GI	2020-07-10 11:08:01	2020-07-10 11:37:00	29	2020-07-10 11:31:28	6	2020-07-10 12:15:00	2020-07-10 12:16:28	1	2020-07-10 12:28:00	2020-07-10 12:43:00	68	15	0	0	0	1	0	1	0	0	1	0	1	4	NULL	NULL	NULL	NULL	NULL	NULL	NULL	NULL	NULL	NULL	NULL	NULL	NULL	NULL	NULL	NULL	NULL	NULL	NULL	NULL	NULL
Anesthesia	Female	51	28.73	Lower GI	2021-08-05 14:10:13	2021-08-05 14:14:00	4	2021-08-05 14:08:00	6	2021-08-05 14:26:00	2021-08-05 14:28:59	2	2021-08-05 14:31:00	2021-08-05 15:11:00	18	40	NULL	NULL	NULL	NULL	NULL	NULL	NULL	NULL	NULL	NULL	NULL	0	NULL	NULL	NULL	NULL	NULL	NULL	NULL	NULL	NULL	NULL	NULL	NULL	NULL	NULL	NULL	NULL	NULL	NULL	NULL	NULL	NULL
Nursing	Female	46	35.19	Upper GI	2020-01-10 11:38:31	2020-01-10 11:57:00	19	2020-01-10 11:47:42	10	2020-01-10 12:04:00	2020-01-10 12:12:38	8	2020-01-10 12:11:00	2020-01-10 13:43:00	34	92	1	0	0	1	0	0	0	0	0	0	0	2	4	mg	NULL	NULL	NULL	NULL	NULL	NULL	NULL	NULL	NULL	NULL	NULL	NULL	NULL	NULL	NULL	NULL	NULL	NULL	NULL
Anesthesia	Male	63	30.68	Lower GI	2021-09-30 13:45:53	2021-09-30 13:54:00	9	2021-09-30 13:47:00	7	2021-09-30 14:31:00	2021-09-30 14:39:38	8	2021-09-30 14:35:00	2021-09-30 15:56:00	54	81	NULL	NULL	NULL	NULL	NULL	NULL	NULL	NULL	NULL	NULL	NULL	0	NULL	NULL	NULL	NULL	NULL	NULL	NULL	NULL	NULL	NULL	NULL	NULL	NULL	NULL	NULL	NULL	NULL	NULL	NULL	NULL	NULL
Nursing	Male	53	41.16	DUAL	2020-08-05 16:25:04	2020-08-05 16:46:00	21	2020-08-05 16:40:25	6	2020-08-05 17:14:00	2020-08-05 17:17:18	3	2020-08-05 17:22:00	2020-08-05 18:13:00	52	51	NULL	NULL	NULL	NULL	NULL	NULL	NULL	NULL	NULL	NULL	NULL	0	NULL	NULL	NULL	NULL	NULL	NULL	NULL	NULL	NULL	NULL	NULL	NULL	NULL	NULL	NULL	NULL	NULL	NULL	NULL	NULL	NULL
Nursing	Female	73	19.58	Lower GI	2021-06-15 08:25:00	2021-06-15 08:48:00	23	2021-06-15 08:44:00	4	2021-06-15 09:19:00	2021-06-15 09:22:43	3	2021-06-15 09:26:00	2021-06-15 09:56:00	57	30	NULL	NULL	NULL	NULL	NULL	NULL	NULL	NULL	NULL	NULL	NULL	0	NULL	NULL	NULL	NULL	NULL	NULL	NULL	NULL	NULL	NULL	NULL	NULL	NULL	NULL	NULL	NULL	NULL	NULL	NULL	NULL	NULL
Nursing	Female	53	40.35	Lower GI	2020-08-31 06:56:10	2020-08-31 07:14:00	18	2020-08-31 07:05:26	9	2020-08-31 07:31:00	2020-08-31 07:35:38	4	2020-08-31 07:36:00	2020-08-31 08:06:00	39	30	0	1	0	0	0	1	0	0	0	0	0	2	NULL	NULL	NULL	NULL	NULL	NULL	NULL	NULL	NULL	NULL	NULL	NULL	NULL	NULL	NULL	NULL	NULL	NULL	NULL	NULL	NULL
Nursing	Female	69	20.6	Lower GI	2020-06-05 14:20:17	2020-06-05 14:40:00	20	2020-06-05 14:30:28	10	2020-06-05 14:51:00	2020-06-05 14:55:36	4	2020-06-05 15:03:00	2020-06-05 15:50:00	35	47	NULL	NULL	NULL	NULL	NULL	NULL	NULL	NULL	NULL	NULL	NULL	0	NULL	NULL	NULL	NULL	NULL	NULL	NULL	NULL	NULL	NULL	NULL	NULL	NULL	NULL	NULL	NULL	NULL	NULL	NULL	NULL	NULL
Nursing	Female	56	30.27	DUAL	2020-06-02 07:22:22	2020-06-02 07:39:00	17	2020-06-02 07:31:00	8	2020-06-02 08:29:00	2020-06-02 08:32:25	3	2020-06-02 08:38:00	2020-06-02 09:21:00	70	43	0	1	0	0	0	1	0	0	0	0	0	2	NULL	NULL	NULL	NULL	NULL	NULL	NULL	NULL	NULL	NULL	NULL	NULL	NULL	NULL	NULL	NULL	NULL	NULL	NULL	NULL	NULL
Nursing	Female	57	31.24	Lower GI	2021-05-06 12:50:29	2021-05-06 13:28:00	38	2021-05-06 13:19:00	9	2021-05-06 13:42:00	2021-05-06 13:45:03	3	2021-05-06 13:50:00	2021-05-06 16:49:00	55	179	1	1	0	1	0	1	0	0	0	0	0	4	NULL	NULL	NULL	NULL	NULL	NULL	NULL	NULL	NULL	NULL	NULL	NULL	NULL	NULL	NULL	NULL	NULL	NULL	NULL	NULL	NULL
Nursing	Female	71	27.07	Lower GI	2020-03-19 11:09:44	2020-03-19 11:56:00	47	2020-03-19 11:44:50	12	2020-03-19 12:07:00	2020-03-19 12:12:00	5	2020-03-19 12:19:00	2020-03-19 12:45:00	63	26	0	0	0	0	0	1	0	0	0	0	0	1	NULL	NULL	NULL	NULL	NULL	NULL	NULL	NULL	NULL	NULL	NULL	NULL	NULL	NULL	NULL	NULL	NULL	NULL	NULL	NULL	NULL
Nursing	Female	64	21.79	Upper GI	2021-01-06 06:41:31	2021-01-06 07:25:00	44	2021-01-06 07:16:00	9	2021-01-06 07:30:00	2021-01-06 07:33:35	3	2021-01-06 07:40:00	2021-01-06 08:17:00	52	37	0	0	0	1	0	0	0	0	0	0	0	1	NULL	NULL	NULL	NULL	NULL	NULL	NULL	NULL	NULL	NULL	NULL	NULL	NULL	NULL	NULL	NULL	NULL	NULL	NULL	NULL	NULL
Anesthesia	Female	72	22.67	Upper GI	2021-09-23 12:14:20	2021-09-23 12:25:00	11	2021-09-23 12:13:00	12	2021-09-23 12:32:00	2021-09-23 12:35:20	3	2021-09-23 12:37:00	2021-09-23 13:40:00	21	63	0	0	0	1	0	0	0	0	0	0	1	2	NULL	NULL	NULL	NULL	NULL	NULL	NULL	NULL	NULL	NULL	NULL	NULL	NULL	NULL	NULL	NULL	NULL	NULL	NULL	NULL	NULL
Nursing	Female	74	27.6	Upper GI	2020-01-31 10:33:04	2020-01-31 10:56:00	23	2020-01-31 10:47:59	9	2020-01-31 10:59:00	2020-01-31 11:01:23	2	2020-01-31 11:06:00	2020-01-31 12:00:00	28	54	0	0	0	1	0	0	0	0	0	0	1	2	NULL	NULL	NULL	NULL	NULL	NULL	NULL	NULL	NULL	NULL	NULL	NULL	NULL	NULL	NULL	NULL	NULL	NULL	NULL	NULL	NULL
Nursing	Female	50	25.75	Lower GI	2020-08-11 11:01:26	2020-08-11 11:17:00	16	2020-08-11 11:03:17	14	2020-08-11 11:32:00	2020-08-11 11:34:39	2	2020-08-11 11:41:00	2020-08-11 12:00:00	33	19	NULL	NULL	NULL	NULL	NULL	NULL	NULL	NULL	NULL	NULL	NULL	0	NULL	NULL	NULL	NULL	NULL	NULL	NULL	NULL	NULL	NULL	NULL	NULL	NULL	NULL	NULL	NULL	NULL	NULL	NULL	NULL	NULL
Nursing	Female	64	29.95	Lower GI	2020-02-07 08:50:00	2020-02-07 09:03:00	13	2020-02-07 08:57:00	6	2020-02-07 09:14:00	2020-02-07 09:17:21	3	2020-02-07 09:22:00	2020-02-07 09:33:00	27	11	0	0	0	0	0	0	0	1	0	0	0	1	NULL	NULL	NULL	NULL	NULL	NULL	NULL	NULL	NULL	NULL	NULL	NULL	NULL	NULL	NULL	NULL	NULL	NULL	NULL	NULL	NULL
Anesthesia	Male	78	25.02	DUAL	2021-10-11 10:40:07	2021-10-11 10:44:00	4	2021-10-11 10:38:00	6	2021-10-11 11:18:00	2021-10-11 11:23:24	5	2021-10-11 11:20:00	2021-10-11 11:49:00	43	29	0	1	0	1	0	1	0	0	1	0	1	5	NULL	NULL	NULL	NULL	NULL	NULL	NULL	NULL	NULL	NULL	NULL	NULL	NULL	NULL	NULL	NULL	NULL	NULL	NULL	NULL	NULL
Nursing	Female	25	18.47	DUAL	2021-03-16 15:12:13	2021-03-16 15:47:00	35	2021-03-16 15:25:23	22	2021-03-16 16:09:00	2021-03-16 16:11:35	2	2021-03-16 16:21:00	2021-03-16 17:30:00	59	69	0	0	0	1	0	0	0	0	0	0	0	1	NULL	NULL	NULL	NULL	NULL	NULL	NULL	NULL	NULL	NULL	NULL	NULL	NULL	NULL	NULL	NULL	NULL	NULL	NULL	NULL	NULL
Nursing	Male	78	28.8	Lower GI	2021-03-25 13:09:04	2021-03-25 14:04:00	55	2021-03-25 13:56:58	8	2021-03-25 14:23:00	2021-03-25 14:26:15	3	2021-03-25 14:33:00	2021-03-25 15:13:00	77	40	1	0	1	0	0	1	0	1	0	0	0	4	NULL	NULL	NULL	NULL	NULL	NULL	NULL	NULL	NULL	NULL	NULL	NULL	NULL	NULL	NULL	NULL	NULL	NULL	NULL	NULL	NULL
Nursing	Male	34	31.57	Lower GI	2020-09-15 13:03:23	2020-09-15 13:28:00	25	2020-09-15 13:11:00	17	2020-09-15 13:44:00	2020-09-15 13:47:47	3	2020-09-15 13:53:00	2020-09-15 15:07:00	44	74	1	0	0	1	0	0	1	0	0	1	0	4	NULL	NULL	NULL	NULL	NULL	NULL	NULL	NULL	NULL	NULL	NULL	NULL	NULL	NULL	NULL	NULL	NULL	NULL	NULL	NULL	NULL
Nursing	Male	65	27.96	Upper GI	2020-08-18 14:58:26	2020-08-18 15:22:00	24	2020-08-18 15:10:00	12	2020-08-18 15:25:00	2020-08-18 15:38:00	13	2020-08-18 15:42:00	2020-08-18 17:20:00	40	98	0	0	0	0	1	0	0	1	0	0	0	2	NULL	NULL	NULL	NULL	NULL	NULL	NULL	NULL	NULL	NULL	NULL	NULL	NULL	NULL	NULL	NULL	NULL	NULL	NULL	NULL	NULL
Nursing	Female	69	27.27	Upper GI	2020-08-11 13:15:18	2020-08-11 13:28:00	13	2020-08-11 13:18:23	10	2020-08-11 13:35:00	2020-08-11 13:39:00	4	2020-08-11 13:44:00	2020-08-11 14:07:00	24	23	0	0	0	0	0	0	0	1	0	0	0	1	NULL	NULL	NULL	NULL	NULL	NULL	NULL	NULL	NULL	NULL	NULL	NULL	NULL	NULL	NULL	NULL	NULL	NULL	NULL	NULL	NULL
Nursing	Female	77	31	Lower GI	2021-03-24 11:30:00	2021-03-24 11:40:00	10	2021-03-24 11:35:00	5	2021-03-24 11:53:00	2021-03-24 11:55:00	2	2021-03-24 12:02:00	2021-03-24 13:01:00	25	59	NULL	NULL	NULL	NULL	NULL	NULL	NULL	NULL	NULL	NULL	NULL	0	NULL	NULL	NULL	NULL	NULL	NULL	NULL	NULL	NULL	NULL	NULL	NULL	NULL	NULL	NULL	NULL	NULL	NULL	NULL	NULL	NULL
Nursing	Female	72	30.04	DUAL	2020-02-19 09:09:15	2020-02-19 09:19:00	10	2020-02-19 09:13:00	6	2020-02-19 10:12:00	2020-02-19 10:16:41	4	2020-02-19 10:19:00	2020-02-19 11:13:00	67	54	0	0	0	0	0	0	0	1	0	0	0	1	NULL	NULL	NULL	NULL	NULL	NULL	NULL	NULL	NULL	NULL	NULL	NULL	NULL	NULL	NULL	NULL	NULL	NULL	NULL	NULL	NULL
Nursing	Male	59	21.52	Upper GI	2021-01-27 13:03:41	2021-01-27 13:33:00	30	2021-01-27 13:22:00	11	2021-01-27 13:36:00	2021-01-27 13:37:47	1	2021-01-27 13:45:00	2021-01-27 14:45:00	34	60	NULL	NULL	NULL	NULL	NULL	NULL	NULL	NULL	NULL	NULL	NULL	0	NULL	NULL	NULL	NULL	NULL	NULL	NULL	NULL	NULL	NULL	NULL	NULL	NULL	NULL	NULL	NULL	NULL	NULL	NULL	NULL	NULL
Nursing	Male	56	32.08	Upper GI	2020-01-13 15:56:20	2020-01-13 16:35:00	39	2020-01-13 16:17:07	18	2020-01-13 16:34:00	2020-01-13 16:37:40	3	2020-01-13 16:43:00	2020-01-13 17:01:00	41	18	0	0	0	0	0	1	0	1	0	0	0	2	NULL	NULL	NULL	NULL	NULL	NULL	NULL	NULL	NULL	NULL	NULL	NULL	NULL	NULL	NULL	NULL	NULL	NULL	NULL	NULL	NULL
Nursing	Female	65	26.45	DUAL	2020-09-21 08:48:01	2020-09-21 09:10:00	22	2020-09-21 09:00:00	10	2020-09-21 09:53:00	2020-09-21 09:55:47	2	2020-09-21 10:00:00	2020-09-21 10:45:00	67	45	NULL	NULL	NULL	NULL	NULL	NULL	NULL	NULL	NULL	NULL	NULL	0	NULL	NULL	NULL	NULL	NULL	NULL	NULL	NULL	NULL	NULL	NULL	NULL	NULL	NULL	NULL	NULL	NULL	NULL	NULL	NULL	NULL
Nursing	Female	67	26.26	Lower GI	2020-05-18 12:19:42	2020-05-18 13:06:00	47	2020-05-18 12:59:00	7	2020-05-18 13:20:00	2020-05-18 13:23:25	3	2020-05-18 13:30:00	2020-05-18 14:21:00	64	51	0	1	0	1	0	1	0	1	0	0	0	4	NULL	NULL	NULL	NULL	NULL	NULL	NULL	NULL	NULL	NULL	NULL	NULL	NULL	NULL	NULL	NULL	NULL	NULL	NULL	NULL	NULL
Nursing	Male	68	25.73	Lower GI	2021-05-26 13:27:31	2021-05-26 13:57:00	30	2021-05-26 13:48:00	9	2021-05-26 14:18:00	2021-05-26 14:21:55	3	2021-05-26 14:30:00	2021-05-26 15:00:00	54	30	NULL	NULL	NULL	NULL	NULL	NULL	NULL	NULL	NULL	NULL	NULL	0	NULL	NULL	NULL	NULL	NULL	NULL	NULL	NULL	NULL	NULL	NULL	NULL	NULL	NULL	NULL	NULL	NULL	NULL	NULL	NULL	NULL
Nursing	Female	65	23.78	Lower GI	2020-01-21 08:06:57	2020-01-21 08:44:00	38	2020-01-21 08:34:40	10	2020-01-21 09:30:00	2020-01-21 09:34:36	4	2020-01-21 09:38:00	2020-01-21 10:30:00	88	52	NULL	NULL	NULL	NULL	NULL	NULL	NULL	NULL	NULL	NULL	NULL	0	NULL	NULL	NULL	NULL	NULL	NULL	NULL	NULL	NULL	NULL	NULL	NULL	NULL	NULL	NULL	NULL	NULL	NULL	NULL	NULL	NULL
Nursing	Female	45	36.96	Lower GI	2021-01-21 08:09:21	2021-01-21 08:38:00	29	2021-01-21 08:26:00	12	2021-01-21 08:59:00	2021-01-21 09:02:07	3	2021-01-21 09:08:00	2021-01-21 09:39:00	53	31	0	0	0	1	0	0	0	0	0	0	0	1	NULL	NULL	NULL	NULL	NULL	NULL	NULL	NULL	NULL	NULL	NULL	NULL	NULL	NULL	NULL	NULL	NULL	NULL	NULL	NULL	NULL
Nursing	Female	76	26.63	Lower GI	2021-04-05 08:13:47	2021-04-05 08:35:00	22	2021-04-05 08:22:16	13	2021-04-05 09:04:00	2021-04-05 09:05:48	1	2021-04-05 09:15:00	2021-04-05 09:59:00	52	44	0	0	0	0	0	1	0	0	0	0	0	1	NULL	NULL	NULL	NULL	NULL	NULL	NULL	NULL	NULL	NULL	NULL	NULL	NULL	NULL	NULL	NULL	NULL	NULL	NULL	NULL	NULL
Anesthesia	Female	64	29.18	Lower GI	2021-09-30 07:14:54	2021-09-30 07:34:00	20	2021-09-30 07:25:00	9	2021-09-30 08:02:00	2021-09-30 08:05:40	3	2021-09-30 08:07:00	2021-09-30 08:33:00	51	26	0	0	0	0	0	1	0	0	0	0	0	1	NULL	NULL	NULL	NULL	NULL	NULL	NULL	NULL	NULL	NULL	NULL	NULL	NULL	NULL	NULL	NULL	NULL	NULL	NULL	NULL	NULL
Nursing	Male	44	26.5	Lower GI	2021-04-19 08:30:14	2021-04-19 08:43:00	13	2021-04-19 08:37:00	6	2021-04-19 08:55:00	2021-04-19 08:58:34	3	2021-04-19 09:05:00	2021-04-19 10:00:00	28	55	NULL	NULL	NULL	NULL	NULL	NULL	NULL	NULL	NULL	NULL	NULL	0	NULL	NULL	NULL	NULL	NULL	NULL	NULL	NULL	NULL	NULL	NULL	NULL	NULL	NULL	NULL	NULL	NULL	NULL	NULL	NULL	NULL
Nursing	Male	65	26.58	Lower GI	2020-03-04 13:26:40	2020-03-04 13:48:00	22	2020-03-04 13:40:31	8	2020-03-04 14:02:00	2020-03-04 14:07:47	5	2020-03-04 14:12:00	2020-03-04 14:42:00	41	30	0	0	1	0	0	1	1	0	0	1	0	4	NULL	NULL	NULL	NULL	NULL	NULL	NULL	NULL	NULL	NULL	NULL	NULL	NULL	NULL	NULL	NULL	NULL	NULL	NULL	NULL	NULL
Nursing	Male	73	29.09	Lower GI	2020-09-16 10:53:28	2020-09-16 11:20:00	27	2020-09-16 11:09:08	11	2020-09-16 11:43:00	2020-09-16 11:48:14	5	2020-09-16 12:11:00	2020-09-16 12:35:00	55	24	0	0	0	0	0	0	0	0	0	0	1	1	NULL	NULL	NULL	NULL	NULL	NULL	NULL	NULL	NULL	NULL	NULL	NULL	NULL	NULL	NULL	NULL	NULL	NULL	NULL	NULL	NULL
Nursing	Female	85	21.95	Upper GI	2020-03-11 14:33:02	2020-03-11 15:26:00	53	2020-03-11 15:12:06	14	2020-03-11 15:28:00	2020-03-11 15:33:00	5	2020-03-11 15:38:00	2020-03-11 16:05:00	60	27	0	0	0	0	0	1	0	0	0	0	0	1	NULL	NULL	NULL	NULL	NULL	NULL	NULL	NULL	NULL	NULL	NULL	NULL	NULL	NULL	NULL	NULL	NULL	NULL	NULL	NULL	NULL
Nursing	Female	79	32.01	Lower GI	2021-03-24 09:51:08	2021-03-24 10:18:00	27	2021-03-24 10:11:14	7	2021-03-24 10:34:00	2021-03-24 10:37:38	3	2021-03-24 10:43:00	2021-03-24 11:15:00	46	32	0	0	0	0	0	1	0	0	0	0	0	1	NULL	NULL	NULL	NULL	NULL	NULL	NULL	NULL	NULL	NULL	NULL	NULL	NULL	NULL	NULL	NULL	NULL	NULL	NULL	NULL	NULL
Nursing	Male	27	22.32	Lower GI	2020-06-09 10:55:00	2020-06-09 11:12:00	17	2020-06-09 11:02:00	10	2020-06-09 12:01:00	2020-06-09 12:03:47	2	2020-06-09 12:16:00	2020-06-09 12:58:00	68	42	NULL	NULL	NULL	NULL	NULL	NULL	NULL	NULL	NULL	NULL	NULL	0	NULL	NULL	NULL	NULL	NULL	NULL	NULL	NULL	NULL	NULL	NULL	NULL	NULL	NULL	NULL	NULL	NULL	NULL	NULL	NULL	NULL
Nursing	Male	70	24.39	Lower GI	2020-03-06 11:38:26	2020-03-06 11:59:00	21	2020-03-06 11:46:43	13	2020-03-06 12:33:00	2020-03-06 12:39:06	6	2020-03-06 12:45:00	2020-03-06 13:15:00	61	30	1	0	0	0	0	0	0	0	0	0	0	1	NULL	NULL	NULL	NULL	NULL	NULL	NULL	NULL	NULL	NULL	NULL	NULL	NULL	NULL	NULL	NULL	NULL	NULL	NULL	NULL	NULL
Nursing	Male	68	32.69	Lower GI	2020-01-21 12:33:04	2020-01-21 13:00:00	27	2020-01-21 12:52:44	8	2020-01-21 13:17:00	2020-01-21 13:19:38	2	2020-01-21 13:23:00	2020-01-21 13:30:00	46	7	1	0	0	0	0	1	0	1	0	0	0	3	NULL	NULL	NULL	NULL	NULL	NULL	NULL	NULL	NULL	NULL	NULL	NULL	NULL	NULL	NULL	NULL	NULL	NULL	NULL	NULL	NULL
Nursing	Male	50	22.05	Lower GI	2020-07-14 07:29:21	2020-07-14 07:51:00	22	2020-07-14 07:44:04	7	2020-07-14 08:37:00	2020-07-14 08:40:21	3	2020-07-14 08:45:00	2020-07-14 09:00:00	71	15	0	0	0	1	0	0	0	0	0	0	0	1	NULL	NULL	NULL	NULL	NULL	NULL	NULL	NULL	NULL	NULL	NULL	NULL	NULL	NULL	NULL	NULL	NULL	NULL	NULL	NULL	NULL
Nursing	Female	50	24	Lower GI	2020-08-19 08:36:54	2020-08-19 09:18:00	42	2020-08-19 09:10:46	8	2020-08-19 09:33:00	2020-08-19 09:35:47	2	2020-08-19 09:40:00	2020-08-19 10:13:00	59	33	0	0	0	1	0	0	0	0	0	0	0	1	NULL	NULL	NULL	NULL	NULL	NULL	NULL	NULL	NULL	NULL	NULL	NULL	NULL	NULL	NULL	NULL	NULL	NULL	NULL	NULL	NULL
Nursing	Female	54	24.8	Lower GI	2021-03-04 15:46:03	2021-03-04 16:24:00	38	2021-03-04 16:14:05	10	2021-03-04 16:28:00	2021-03-04 16:56:11	28	2021-03-04 17:01:00	2021-03-04 17:18:00	70	17	NULL	NULL	NULL	NULL	NULL	NULL	NULL	NULL	NULL	NULL	NULL	0	NULL	NULL	NULL	NULL	NULL	NULL	NULL	NULL	NULL	NULL	NULL	NULL	NULL	NULL	NULL	NULL	NULL	NULL	NULL	NULL	NULL
Nursing	Female	63	39.13	Lower GI	2021-02-09 08:24:40	2021-02-09 09:16:00	52	2021-02-09 09:10:09	6	2021-02-09 09:58:00	2021-02-09 10:00:39	2	2021-02-09 10:06:00	2021-02-09 10:36:00	96	30	0	1	0	0	0	1	0	0	0	0	0	2	NULL	NULL	NULL	NULL	NULL	NULL	NULL	NULL	NULL	NULL	NULL	NULL	NULL	NULL	NULL	NULL	NULL	NULL	NULL	NULL	NULL
Anesthesia	Female	88	21.03	Lower GI	2021-09-01 10:33:22	2021-09-01 10:40:00	7	2021-09-01 10:34:00	6	2021-09-01 10:52:00	2021-09-01 10:55:54	3	2021-09-01 11:00:00	2021-09-01 11:45:00	22	45	0	0	0	0	0	1	0	0	0	0	1	2	NULL	NULL	NULL	NULL	NULL	NULL	NULL	NULL	NULL	NULL	NULL	NULL	NULL	NULL	NULL	NULL	NULL	NULL	NULL	NULL	NULL
Nursing	Female	42	30.12	Upper GI	2021-01-26 09:42:14	2021-01-26 10:15:00	33	2021-01-26 10:06:00	9	2021-01-26 10:23:00	2021-01-26 10:29:39	6	2021-01-26 10:37:00	2021-01-26 11:15:00	47	38	NULL	NULL	NULL	NULL	NULL	NULL	NULL	NULL	NULL	NULL	NULL	0	NULL	NULL	NULL	NULL	NULL	NULL	NULL	NULL	NULL	NULL	NULL	NULL	NULL	NULL	NULL	NULL	NULL	NULL	NULL	NULL	NULL
Nursing	Male	56	24.68	Lower GI	2021-03-18 11:36:25	2021-03-18 12:09:00	33	2021-03-18 11:58:00	11	2021-03-18 12:28:00	2021-03-18 12:29:09	1	2021-03-18 12:35:00	2021-03-18 13:18:00	53	43	NULL	NULL	NULL	NULL	NULL	NULL	NULL	NULL	NULL	NULL	NULL	0	NULL	NULL	NULL	NULL	NULL	NULL	NULL	NULL	NULL	NULL	NULL	NULL	NULL	NULL	NULL	NULL	NULL	NULL	NULL	NULL	NULL
Nursing	Male	30	26.5	DUAL	2021-05-05 14:55:52	2021-05-05 15:11:00	16	2021-05-05 15:02:11	9	2021-05-05 15:29:00	2021-05-05 15:33:24	4	2021-05-05 15:45:00	2021-05-05 16:02:00	38	17	1	0	0	0	0	0	0	1	0	0	0	2	NULL	NULL	NULL	NULL	NULL	NULL	NULL	NULL	NULL	NULL	NULL	NULL	NULL	NULL	NULL	NULL	NULL	NULL	NULL	NULL	NULL
Nursing	Female	71	22.67	Upper GI	2021-05-12 14:11:15	2021-05-12 14:37:00	26	2021-05-12 14:27:00	10	2021-05-12 14:51:00	2021-05-12 14:54:10	3	2021-05-12 15:02:00	2021-05-12 16:20:00	43	78	0	1	0	0	0	1	0	0	0	0	0	2	NULL	NULL	NULL	NULL	NULL	NULL	NULL	NULL	NULL	NULL	NULL	NULL	NULL	NULL	NULL	NULL	NULL	NULL	NULL	NULL	NULL
Nursing	Female	53	25.02	Lower GI	2020-01-08 07:51:18	2020-01-08 08:57:00	66	2020-01-08 08:51:00	6	2020-01-08 09:11:00	2020-01-08 09:14:42	3	2020-01-08 09:20:00	2020-01-08 10:05:00	83	45	NULL	NULL	NULL	NULL	NULL	NULL	NULL	NULL	NULL	NULL	NULL	0	NULL	NULL	NULL	NULL	NULL	NULL	NULL	NULL	NULL	NULL	NULL	NULL	NULL	NULL	NULL	NULL	NULL	NULL	NULL	NULL	NULL
Nursing	Female	61	34.74	Lower GI	2020-01-28 07:15:20	2020-01-28 07:53:00	38	2020-01-28 07:43:28	10	2020-01-28 08:04:00	2020-01-28 08:08:19	4	2020-01-28 08:14:00	2020-01-28 08:43:00	53	29	0	0	0	1	0	1	0	0	0	0	0	2	NULL	NULL	NULL	NULL	NULL	NULL	NULL	NULL	NULL	NULL	NULL	NULL	NULL	NULL	NULL	NULL	NULL	NULL	NULL	NULL	NULL
Nursing	Female	82	24.51	Lower GI	2020-03-12 06:54:37	2020-03-12 07:28:00	34	2020-03-12 07:18:51	10	2020-03-12 07:51:00	2020-03-12 07:54:32	3	2020-03-12 08:01:00	2020-03-12 08:16:00	60	15	0	0	0	1	0	1	0	0	0	0	0	2	NULL	NULL	NULL	NULL	NULL	NULL	NULL	NULL	NULL	NULL	NULL	NULL	NULL	NULL	NULL	NULL	NULL	NULL	NULL	NULL	NULL
Nursing	Female	71	30.11	Lower GI	2021-04-07 08:25:10	2021-04-07 09:16:00	51	2021-04-07 09:07:53	9	2021-04-07 09:40:00	2021-04-07 09:41:24	1	2021-04-07 09:48:00	2021-04-07 10:15:00	76	27	0	0	0	0	0	0	0	1	0	0	0	1	NULL	NULL	NULL	NULL	NULL	NULL	NULL	NULL	NULL	NULL	NULL	NULL	NULL	NULL	NULL	NULL	NULL	NULL	NULL	NULL	NULL
Anesthesia	Female	68	29.86	Upper GI	2021-09-20 08:08:49	2021-09-20 08:29:00	21	2021-09-20 08:23:00	6	2021-09-20 08:45:00	2021-09-20 08:51:05	6	2021-09-20 08:56:00	2021-09-20 09:22:00	43	26	0	0	0	1	0	0	0	0	0	0	0	1	NULL	NULL	NULL	NULL	NULL	NULL	NULL	NULL	NULL	NULL	NULL	NULL	NULL	NULL	NULL	NULL	NULL	NULL	NULL	NULL	NULL
Nursing	Female	66	27.12	Lower GI	2020-09-14 13:49:44	2020-09-14 14:04:00	15	2020-09-14 13:58:15	6	2020-09-14 14:20:00	2020-09-14 14:23:49	3	2020-09-14 14:27:00	2020-09-14 15:15:00	34	48	NULL	NULL	NULL	NULL	NULL	NULL	NULL	NULL	NULL	NULL	NULL	0	NULL	NULL	NULL	NULL	NULL	NULL	NULL	NULL	NULL	NULL	NULL	NULL	NULL	NULL	NULL	NULL	NULL	NULL	NULL	NULL	NULL
Nursing	Female	42	42.97	Lower GI	2021-02-12 07:07:31	2021-02-12 07:46:00	39	2021-02-12 07:34:00	12	2021-02-12 07:58:00	2021-02-12 07:59:47	1	2021-02-12 08:00:00	2021-02-12 08:50:00	52	50	1	0	0	0	0	1	0	0	0	0	0	2	NULL	NULL	NULL	NULL	NULL	NULL	NULL	NULL	NULL	NULL	NULL	NULL	NULL	NULL	NULL	NULL	NULL	NULL	NULL	NULL	NULL
Nursing	Female	75	33.84	Lower GI	2020-12-07 06:52:46	2020-12-07 07:05:00	13	2020-12-07 06:58:37	7	2020-12-07 07:26:00	2020-12-07 07:29:45	3	2020-12-07 07:33:00	2020-12-07 08:18:00	37	45	1	0	0	0	0	0	0	0	0	0	0	1	NULL	NULL	NULL	NULL	NULL	NULL	NULL	NULL	NULL	NULL	NULL	NULL	NULL	NULL	NULL	NULL	NULL	NULL	NULL	NULL	NULL
Anesthesia	Female	77	24.82	Lower GI	2021-10-13 08:57:52	2021-10-13 09:02:00	5	2021-10-13 08:54:00	8	2021-10-13 09:22:00	2021-10-13 09:26:21	4	2021-10-13 09:29:00	2021-10-13 10:00:00	29	31	0	0	0	1	0	0	0	0	0	0	0	1	NULL	NULL	NULL	NULL	NULL	NULL	NULL	NULL	NULL	NULL	NULL	NULL	NULL	NULL	NULL	NULL	NULL	NULL	NULL	NULL	NULL
Nursing	Female	54	27.44	Lower GI	2021-06-17 12:36:19	2021-06-17 12:51:00	15	2021-06-17 12:43:00	8	2021-06-17 13:02:00	2021-06-17 13:06:39	4	2021-06-17 13:10:00	2021-06-17 13:40:00	30	30	NULL	NULL	NULL	NULL	NULL	NULL	NULL	NULL	NULL	NULL	NULL	0	NULL	NULL	NULL	NULL	NULL	NULL	NULL	NULL	NULL	NULL	NULL	NULL	NULL	NULL	NULL	NULL	NULL	NULL	NULL	NULL	NULL
Nursing	Female	75	29.18	Lower GI	2021-03-16 12:58:51	2021-03-16 13:50:00	52	2021-03-16 13:43:08	7	2021-03-16 14:10:00	2021-03-16 14:13:44	3	2021-03-16 14:18:00	2021-03-16 15:00:00	75	42	0	0	0	1	0	0	0	0	1	0	0	2	NULL	NULL	NULL	NULL	NULL	NULL	NULL	NULL	NULL	NULL	NULL	NULL	NULL	NULL	NULL	NULL	NULL	NULL	NULL	NULL	NULL
Nursing	Male	81	23.87	Lower GI	2020-03-11 15:53:52	2020-03-11 16:05:00	12	2020-03-11 15:58:29	7	2020-03-11 16:30:00	2020-03-11 16:35:00	5	2020-03-11 16:40:00	2020-03-11 17:52:00	42	72	0	0	0	0	0	1	0	0	0	0	0	1	NULL	NULL	NULL	NULL	NULL	NULL	NULL	NULL	NULL	NULL	NULL	NULL	NULL	NULL	NULL	NULL	NULL	NULL	NULL	NULL	NULL
Anesthesia	Female	55	23.54	Lower GI	2021-10-13 10:06:26	2021-10-13 10:10:00	4	2021-10-13 10:05:00	5	2021-10-13 10:25:00	2021-10-13 10:34:00	9	2021-10-13 10:30:00	2021-10-13 10:45:00	28	15	0	0	0	1	0	0	0	0	0	0	1	2	NULL	NULL	NULL	NULL	NULL	NULL	NULL	NULL	NULL	NULL	NULL	NULL	NULL	NULL	NULL	NULL	NULL	NULL	NULL	NULL	NULL
Anesthesia	Male	82	24.08	Lower GI	2021-09-16 14:51:31	2021-09-16 14:55:00	4	2021-09-16 14:51:00	4	2021-09-16 15:17:00	2021-09-16 15:20:29	3	2021-09-16 15:24:00	2021-09-16 15:55:00	29	31	0	0	0	1	0	1	1	0	0	1	0	4	NULL	NULL	NULL	NULL	NULL	NULL	NULL	NULL	NULL	NULL	NULL	NULL	NULL	NULL	NULL	NULL	NULL	NULL	NULL	NULL	NULL
Nursing	Female	61	30.62	Lower GI	2020-10-26 07:19:51	2020-10-26 08:04:00	45	2020-10-26 07:58:21	6	2020-10-26 08:17:00	2020-10-26 08:21:03	4	2020-10-26 08:22:00	2020-10-26 09:00:00	62	38	NULL	NULL	NULL	NULL	NULL	NULL	NULL	NULL	NULL	NULL	NULL	0	NULL	NULL	NULL	NULL	NULL	NULL	NULL	NULL	NULL	NULL	NULL	NULL	NULL	NULL	NULL	NULL	NULL	NULL	NULL	NULL	NULL
Nursing	Female	57	26.26	Lower GI	2020-01-23 07:56:36	2020-01-23 08:53:00	57	2020-01-23 08:43:00	10	2020-01-23 09:25:00	2020-01-23 09:27:42	2	2020-01-23 09:35:00	2020-01-23 10:06:00	91	31	NULL	NULL	NULL	NULL	NULL	NULL	NULL	NULL	NULL	NULL	NULL	0	NULL	NULL	NULL	NULL	NULL	NULL	NULL	NULL	NULL	NULL	NULL	NULL	NULL	NULL	NULL	NULL	NULL	NULL	NULL	NULL	NULL
Nursing	Female	29	37.93	Upper GI	2020-01-07 10:07:44	2020-01-07 10:57:00	50	2020-01-07 10:49:53	8	2020-01-07 11:01:00	2020-01-07 11:06:04	5	2020-01-07 11:08:00	2020-01-07 12:20:00	59	72	NULL	NULL	NULL	NULL	NULL	NULL	NULL	NULL	NULL	NULL	NULL	0	NULL	NULL	NULL	NULL	NULL	NULL	NULL	NULL	NULL	NULL	NULL	NULL	NULL	NULL	NULL	NULL	NULL	NULL	NULL	NULL	NULL
Nursing	Male	68	23.71	Lower GI	2020-10-16 09:37:50	2020-10-16 09:48:00	11	2020-10-16 09:43:00	5	2020-10-16 10:07:00	2020-10-16 10:11:14	4	2020-10-16 10:17:00	2020-10-16 10:51:00	34	34	1	1	0	1	0	1	0	1	0	0	0	5	NULL	NULL	NULL	NULL	NULL	NULL	NULL	NULL	NULL	NULL	NULL	NULL	NULL	NULL	NULL	NULL	NULL	NULL	NULL	NULL	NULL
Nursing	Female	64	33.07	Upper GI	2020-09-22 06:07:42	2020-09-22 07:13:00	66	2020-09-22 07:08:27	5	2020-09-22 07:25:00	2020-09-22 07:32:40	7	2020-09-22 07:38:00	2020-09-22 08:17:00	85	39	1	0	0	1	0	1	0	0	0	0	0	3	NULL	NULL	NULL	NULL	NULL	NULL	NULL	NULL	NULL	NULL	NULL	NULL	NULL	NULL	NULL	NULL	NULL	NULL	NULL	NULL	NULL
Nursing	Male	62	26.43	Lower GI	2021-05-13 09:14:01	2021-05-13 09:40:00	26	2021-05-13 09:31:24	9	2021-05-13 10:11:00	2021-05-13 10:16:52	5	2021-05-13 10:20:00	2021-05-13 11:16:00	62	56	0	0	0	1	0	1	0	0	0	0	0	2	NULL	NULL	NULL	NULL	NULL	NULL	NULL	NULL	NULL	NULL	NULL	NULL	NULL	NULL	NULL	NULL	NULL	NULL	NULL	NULL	NULL
Nursing	Male	59	25.24	Lower GI	2021-01-11 09:02:54	2021-01-11 09:20:00	18	2021-01-11 09:09:01	11	2021-01-11 09:27:00	2021-01-11 09:30:22	3	2021-01-11 09:36:00	2021-01-11 10:00:00	28	24	0	0	1	0	0	1	0	0	0	0	0	2	NULL	NULL	NULL	NULL	NULL	NULL	NULL	NULL	NULL	NULL	NULL	NULL	NULL	NULL	NULL	NULL	NULL	NULL	NULL	NULL	NULL
Nursing	Female	61	32.32	Lower GI	2020-08-19 15:19:03	2020-08-19 15:35:00	16	2020-08-19 15:27:17	8	2020-08-19 15:48:00	2020-08-19 15:51:51	3	2020-08-19 15:55:00	2020-08-19 16:40:00	32	45	1	0	0	1	0	1	0	1	0	0	0	4	NULL	NULL	NULL	NULL	NULL	NULL	NULL	NULL	NULL	NULL	NULL	NULL	NULL	NULL	NULL	NULL	NULL	NULL	NULL	NULL	NULL
Nursing	Female	32	22.81	Upper GI	2020-01-17 08:35:29	2020-01-17 09:32:00	57	2020-01-17 09:23:27	9	2020-01-17 09:38:00	2020-01-17 09:39:41	1	2020-01-17 09:47:00	2020-01-17 10:47:00	64	60	0	0	0	0	0	1	1	0	0	1	0	3	NULL	NULL	NULL	NULL	NULL	NULL	NULL	NULL	NULL	NULL	NULL	NULL	NULL	NULL	NULL	NULL	NULL	NULL	NULL	NULL	NULL
Nursing	Female	73	29.26	Upper GI	2021-06-08 07:27:02	2021-06-08 08:00:00	33	2021-06-08 07:53:25	7	2021-06-08 08:06:00	2021-06-08 08:07:35	1	2021-06-08 08:13:00	2021-06-08 08:33:00	40	20	1	0	0	1	0	1	1	0	0	1	0	5	NULL	NULL	NULL	NULL	NULL	NULL	NULL	NULL	NULL	NULL	NULL	NULL	NULL	NULL	NULL	NULL	NULL	NULL	NULL	NULL	NULL
Nursing	Female	72	27.44	Lower GI	2020-01-28 14:26:28	2020-01-28 15:21:00	55	2020-01-28 15:10:31	11	2020-01-28 16:00:00	2020-01-28 16:05:30	5	2020-01-28 16:11:00	2020-01-28 16:21:00	99	10	1	0	0	1	0	1	1	0	0	1	0	5	NULL	NULL	NULL	NULL	NULL	NULL	NULL	NULL	NULL	NULL	NULL	NULL	NULL	NULL	NULL	NULL	NULL	NULL	NULL	NULL	NULL
Anesthesia	Female	60	24.69	Upper GI	2021-09-13 16:25:31	2021-09-13 16:35:00	10	2021-09-13 16:30:00	5	2021-09-13 16:43:00	2021-09-13 16:49:20	6	2021-09-13 16:45:00	2021-09-13 17:37:00	24	52	0	0	0	1	0	1	0	0	0	0	0	2	4	mg	NULL	NULL	NULL	NULL	NULL	NULL	NULL	NULL	NULL	NULL	NULL	NULL	NULL	NULL	NULL	NULL	NULL	NULL	NULL
Nursing	Female	60	32.95	Upper GI	2020-06-09 10:55:20	2020-06-09 11:33:00	38	2020-06-09 11:27:03	6	2020-06-09 11:36:00	2020-06-09 11:38:58	2	2020-06-09 11:44:00	2020-06-09 12:35:00	43	51	0	1	0	1	0	1	0	1	0	0	0	4	NULL	NULL	NULL	NULL	NULL	NULL	NULL	NULL	NULL	NULL	NULL	NULL	NULL	NULL	NULL	NULL	NULL	NULL	NULL	NULL	NULL
Nursing	Male	68	27.69	Lower GI	2020-09-14 09:54:29	2020-09-14 10:24:00	30	2020-09-14 10:13:00	11	2020-09-14 10:41:00	2020-09-14 10:42:24	1	2020-09-14 10:47:00	2020-09-14 11:30:00	48	43	0	0	0	0	0	0	1	0	0	1	0	2	NULL	NULL	NULL	NULL	NULL	NULL	NULL	NULL	NULL	NULL	NULL	NULL	NULL	NULL	NULL	NULL	NULL	NULL	NULL	NULL	NULL
Nursing	Male	58	30.4	Lower GI	2020-01-27 07:23:39	2020-01-27 08:08:00	45	2020-01-27 08:00:15	8	2020-01-27 08:33:00	2020-01-27 08:46:20	13	2020-01-27 08:41:00	2020-01-27 09:00:00	83	19	0	0	0	0	0	1	0	0	0	0	0	1	NULL	NULL	NULL	NULL	NULL	NULL	NULL	NULL	NULL	NULL	NULL	NULL	NULL	NULL	NULL	NULL	NULL	NULL	NULL	NULL	NULL
Nursing	Female	43	26.61	DUAL	2020-01-29 14:24:48	2020-01-29 15:14:00	50	2020-01-29 15:03:01	11	2020-01-29 15:40:00	2020-01-29 15:46:43	6	2020-01-29 15:53:00	2020-01-29 16:33:00	82	40	0	1	0	0	0	0	0	0	0	0	0	1	NULL	NULL	NULL	NULL	NULL	NULL	NULL	NULL	NULL	NULL	NULL	NULL	NULL	NULL	NULL	NULL	NULL	NULL	NULL	NULL	NULL
Nursing	Female	37	32.01	Lower GI	2020-12-02 10:48:15	2020-12-02 11:13:00	25	2020-12-02 11:01:58	12	2020-12-02 11:25:00	2020-12-02 11:29:20	4	2020-12-02 11:33:00	2020-12-02 12:26:00	41	53	0	0	0	1	0	0	0	0	0	0	0	1	NULL	NULL	NULL	NULL	NULL	NULL	NULL	NULL	NULL	NULL	NULL	NULL	NULL	NULL	NULL	NULL	NULL	NULL	NULL	NULL	NULL
Nursing	Male	60	27.71	Lower GI	2021-06-28 10:39:08	2021-06-28 10:52:00	13	2021-06-28 10:43:23	9	2021-06-28 11:10:00	2021-06-28 11:17:38	7	2021-06-28 11:23:00	2021-06-28 11:59:00	38	36	0	1	0	0	0	0	0	0	0	0	0	1	NULL	NULL	NULL	NULL	NULL	NULL	NULL	NULL	NULL	NULL	NULL	NULL	NULL	NULL	NULL	NULL	NULL	NULL	NULL	NULL	NULL
Anesthesia	Male	73	28.59	Lower GI	2021-09-02 15:32:46	2021-09-02 15:40:00	8	2021-09-02 15:32:00	8	2021-09-02 15:57:00	2021-09-02 16:01:28	4	2021-09-02 16:05:00	2021-09-02 16:45:00	29	40	0	0	0	0	0	1	0	0	0	0	0	1	NULL	NULL	NULL	NULL	NULL	NULL	NULL	NULL	NULL	NULL	NULL	NULL	NULL	NULL	NULL	NULL	NULL	NULL	NULL	NULL	NULL
Anesthesia	Female	62	26.93	DUAL	2021-10-04 08:55:05	2021-10-04 09:01:00	6	2021-10-04 08:53:00	8	2021-10-04 09:27:00	2021-10-04 09:30:12	3	2021-10-04 09:20:00	2021-10-04 10:15:00	35	55	1	0	0	1	0	1	0	1	0	0	0	4	NULL	NULL	NULL	NULL	NULL	NULL	NULL	NULL	NULL	NULL	NULL	NULL	NULL	NULL	NULL	NULL	NULL	NULL	NULL	NULL	NULL
Nursing	Female	48	22.47	Upper GI	2021-04-28 15:10:48	2021-04-28 15:44:00	34	2021-04-28 15:35:56	9	2021-04-28 15:49:00	2021-04-28 16:05:08	16	2021-04-28 16:04:00	2021-04-28 17:15:00	55	71	0	0	0	0	0	0	0	1	0	0	0	1	NULL	NULL	NULL	NULL	NULL	NULL	NULL	NULL	NULL	NULL	NULL	NULL	NULL	NULL	NULL	NULL	NULL	NULL	NULL	NULL	NULL
Nursing	Female	70	20.36	Lower GI	2021-03-02 08:40:35	2021-03-02 09:05:00	25	2021-03-02 08:58:19	7	2021-03-02 09:21:00	2021-03-02 09:26:43	5	2021-03-02 09:32:00	2021-03-02 09:55:00	46	23	0	0	0	1	0	0	0	0	0	0	0	1	NULL	NULL	NULL	NULL	NULL	NULL	NULL	NULL	NULL	NULL	NULL	NULL	NULL	NULL	NULL	NULL	NULL	NULL	NULL	NULL	NULL
Nursing	Female	52	22.6	Lower GI	2020-03-04 10:29:17	2020-03-04 10:35:00	6	2020-03-04 10:29:00	6	2020-03-04 10:55:00	2020-03-04 10:58:24	3	2020-03-04 11:04:00	2020-03-04 11:51:00	29	47	NULL	NULL	NULL	NULL	NULL	NULL	NULL	NULL	NULL	NULL	NULL	0	NULL	NULL	NULL	NULL	NULL	NULL	NULL	NULL	NULL	NULL	NULL	NULL	NULL	NULL	NULL	NULL	NULL	NULL	NULL	NULL	NULL
Nursing	Female	84	27.44	Lower GI	2020-01-23 08:52:00	2020-01-23 09:51:00	59	2020-01-23 09:42:10	9	2020-01-23 10:16:00	2020-01-23 10:19:44	3	2020-01-23 10:26:00	2020-01-23 11:10:00	87	44	0	0	0	1	0	1	0	0	0	0	0	2	NULL	NULL	NULL	NULL	NULL	NULL	NULL	NULL	NULL	NULL	NULL	NULL	NULL	NULL	NULL	NULL	NULL	NULL	NULL	NULL	NULL
Nursing	Female	49	40.9	Upper GI	2020-11-16 11:23:49	2020-11-16 11:45:00	22	2020-11-16 11:34:39	11	2020-11-16 11:51:00	2020-11-16 11:56:05	5	2020-11-16 12:03:00	2020-11-16 12:42:00	33	39	0	0	0	0	0	0	0	1	0	0	0	1	NULL	NULL	NULL	NULL	NULL	NULL	NULL	NULL	NULL	NULL	NULL	NULL	NULL	NULL	NULL	NULL	NULL	NULL	NULL	NULL	NULL
Nursing	Female	61	27.46	Upper GI	2020-11-25 14:10:01	2020-11-25 14:36:00	26	2020-11-25 14:29:25	7	2020-11-25 14:42:00	2020-11-25 14:47:33	5	2020-11-25 14:52:00	2020-11-25 15:35:00	37	43	1	0	1	0	0	1	0	1	0	0	0	4	NULL	NULL	NULL	NULL	NULL	NULL	NULL	NULL	NULL	NULL	NULL	NULL	NULL	NULL	NULL	NULL	NULL	NULL	NULL	NULL	NULL
Nursing	Male	69	25.38	Upper GI	2020-02-20 09:23:27	2020-02-20 09:45:00	22	2020-02-20 09:33:41	12	2020-02-20 09:51:00	2020-02-20 09:56:18	5	2020-02-20 10:00:00	2020-02-20 11:04:00	33	64	NULL	NULL	NULL	NULL	NULL	NULL	NULL	NULL	NULL	NULL	NULL	0	NULL	NULL	NULL	NULL	NULL	NULL	NULL	NULL	NULL	NULL	NULL	NULL	NULL	NULL	NULL	NULL	NULL	NULL	NULL	NULL	NULL
Nursing	Female	41	24.89	Upper GI	2020-10-14 09:14:57	2020-10-14 09:59:00	45	2020-10-14 09:51:21	8	2020-10-14 10:02:00	2020-10-14 10:04:35	2	2020-10-14 10:09:00	2020-10-14 10:54:00	50	45	0	0	0	1	0	0	0	0	0	0	0	1	NULL	NULL	NULL	NULL	NULL	NULL	NULL	NULL	NULL	NULL	NULL	NULL	NULL	NULL	NULL	NULL	NULL	NULL	NULL	NULL	NULL
Nursing	Female	61	38.07	Lower GI	2021-01-22 09:46:53	2021-01-22 10:46:00	60	2021-01-22 10:34:36	12	2021-01-22 10:57:00	2021-01-22 10:58:29	1	2021-01-22 11:05:00	2021-01-22 11:47:00	72	42	1	0	0	1	0	1	0	0	0	0	0	3	NULL	NULL	NULL	NULL	NULL	NULL	NULL	NULL	NULL	NULL	NULL	NULL	NULL	NULL	NULL	NULL	NULL	NULL	NULL	NULL	NULL
Nursing	Female	73	32.95	Lower GI	2020-07-27 08:00:41	2020-07-27 08:34:00	34	2020-07-27 08:12:24	22	2020-07-27 08:40:00	2020-07-27 08:42:54	2	2020-07-27 08:47:00	2020-07-27 09:37:00	42	50	NULL	NULL	NULL	NULL	NULL	NULL	NULL	NULL	NULL	NULL	NULL	0	NULL	NULL	NULL	NULL	NULL	NULL	NULL	NULL	NULL	NULL	NULL	NULL	NULL	NULL	NULL	NULL	NULL	NULL	NULL	NULL	NULL
Anesthesia	Female	64	32.77	Upper GI	2021-09-30 09:18:27	2021-09-30 09:28:00	10	2021-09-30 09:18:00	10	2021-09-30 09:33:00	2021-09-30 09:38:00	5	2021-09-30 09:40:00	2021-09-30 10:10:00	20	30	0	0	0	0	0	1	0	0	0	0	0	1	4	mg	NULL	NULL	NULL	NULL	NULL	NULL	NULL	NULL	NULL	NULL	NULL	NULL	NULL	NULL	NULL	NULL	NULL	NULL	NULL
Nursing	Male	82	27.31	Upper GI	2020-12-07 13:42:03	2020-12-07 14:16:00	34	2020-12-07 14:04:20	12	2020-12-07 14:23:00	2020-12-07 14:25:05	2	2020-12-07 14:30:00	2020-12-07 14:45:00	43	15	0	0	1	0	0	1	1	0	1	1	0	5	NULL	NULL	NULL	NULL	NULL	NULL	NULL	NULL	NULL	NULL	NULL	NULL	NULL	NULL	NULL	NULL	NULL	NULL	NULL	NULL	NULL
Nursing	Male	80	26	Lower GI	2020-12-17 15:02:00	2020-12-17 15:16:00	14	2020-12-17 15:10:00	6	2020-12-17 15:26:00	2020-12-17 15:32:14	6	2020-12-17 15:38:00	2020-12-17 16:17:00	30	39	0	0	0	0	0	1	1	0	0	1	1	4	NULL	NULL	NULL	NULL	NULL	NULL	NULL	NULL	NULL	NULL	NULL	NULL	NULL	NULL	NULL	NULL	NULL	NULL	NULL	NULL	NULL
Nursing	Female	51	29.69	Lower GI	2020-11-03 10:25:55	2020-11-03 11:11:00	46	2020-11-03 11:06:00	5	2020-11-03 11:26:00	2020-11-03 11:29:08	3	2020-11-03 11:30:00	2020-11-03 12:05:00	64	35	NULL	NULL	NULL	NULL	NULL	NULL	NULL	NULL	NULL	NULL	NULL	0	NULL	NULL	NULL	NULL	NULL	NULL	NULL	NULL	NULL	NULL	NULL	NULL	NULL	NULL	NULL	NULL	NULL	NULL	NULL	NULL	NULL
Nursing	Female	57	27.25	Lower GI	2021-04-12 11:19:28	2021-04-12 11:50:00	31	2021-04-12 11:46:38	4	2021-04-12 12:10:00	2021-04-12 12:15:29	5	2021-04-12 12:15:00	2021-04-12 13:41:00	56	86	1	0	0	1	0	1	0	0	0	0	0	3	NULL	NULL	NULL	NULL	NULL	NULL	NULL	NULL	NULL	NULL	NULL	NULL	NULL	NULL	NULL	NULL	NULL	NULL	NULL	NULL	NULL
Nursing	Male	56	22.96	Lower GI	2020-03-02 09:19:02	2020-03-02 09:33:00	14	2020-03-02 09:24:24	9	2020-03-02 09:55:00	2020-03-02 09:57:51	2	2020-03-02 10:05:00	2020-03-02 10:34:00	38	29	0	1	0	0	0	0	0	0	0	0	0	1	NULL	NULL	NULL	NULL	NULL	NULL	NULL	NULL	NULL	NULL	NULL	NULL	NULL	NULL	NULL	NULL	NULL	NULL	NULL	NULL	NULL
Nursing	Female	67	28.71	DUAL	2020-01-23 10:04:11	2020-01-23 10:59:00	55	2020-01-23 10:48:00	11	2020-01-23 11:52:00	2020-01-23 11:55:27	3	2020-01-23 07:00:00	2020-01-23 12:59:00	111	359	0	0	0	0	0	1	1	0	0	1	0	3	NULL	NULL	NULL	NULL	NULL	NULL	NULL	NULL	NULL	NULL	225	mcg	NULL	NULL	NULL	NULL	NULL	NULL	NULL	NULL	NULL
Nursing	Male	62	21.52	Lower GI	2020-02-11 13:10:17	2020-02-11 13:48:00	38	2020-02-11 13:39:21	9	2020-02-11 14:05:00	2020-02-11 14:18:51	13	2020-02-11 14:12:00	2020-02-11 14:45:00	68	33	0	0	0	0	0	0	0	0	0	0	1	1	NULL	NULL	NULL	NULL	NULL	NULL	NULL	NULL	NULL	NULL	NULL	NULL	NULL	NULL	NULL	NULL	NULL	NULL	NULL	NULL	NULL
Anesthesia	Male	77	24.68	Lower GI	2021-10-21 08:48:59	2021-10-21 08:51:00	3	2021-10-21 08:43:00	8	2021-10-21 09:14:00	2021-10-21 09:18:03	4	2021-10-21 09:15:00	2021-10-21 10:17:00	30	62	0	1	0	0	0	1	1	0	0	1	1	5	NULL	NULL	NULL	NULL	NULL	NULL	NULL	NULL	NULL	NULL	NULL	NULL	NULL	NULL	NULL	NULL	NULL	NULL	NULL	NULL	NULL
Nursing	Male	76	28.15	DUAL	2020-11-05 08:49:25	2020-11-05 09:16:00	27	2020-11-05 09:08:00	8	2020-11-05 09:56:00	2020-11-05 09:57:32	1	2020-11-05 10:06:00	2020-11-05 10:45:00	68	39	0	1	0	0	0	1	1	0	0	1	1	5	NULL	NULL	NULL	NULL	NULL	NULL	NULL	NULL	NULL	NULL	NULL	NULL	NULL	NULL	NULL	NULL	NULL	NULL	NULL	NULL	NULL
Nursing	Female	38	33.66	Upper GI	2020-06-03 10:01:38	2020-06-03 10:38:00	37	2020-06-03 10:28:00	10	2020-06-03 10:39:00	2020-06-03 10:43:27	4	2020-06-03 10:49:00	2020-06-03 11:33:00	42	44	0	0	0	0	0	0	0	0	0	0	0	0	NULL	NULL	NULL	NULL	NULL	NULL	NULL	NULL	NULL	NULL	NULL	NULL	NULL	NULL	NULL	NULL	NULL	NULL	NULL	NULL	NULL
Nursing	Male	62	22.96	Lower GI	2020-02-11 08:52:54	2020-02-11 10:00:00	68	2020-02-11 09:55:00	5	2020-02-11 10:27:00	2020-02-11 10:30:00	3	2020-02-11 10:35:00	2020-02-11 11:18:00	98	43	NULL	NULL	NULL	NULL	NULL	NULL	NULL	NULL	NULL	NULL	NULL	0	NULL	NULL	NULL	NULL	NULL	NULL	NULL	NULL	NULL	NULL	NULL	NULL	NULL	NULL	NULL	NULL	NULL	NULL	NULL	NULL	NULL
Nursing	Female	82	22.31	DUAL	2021-03-29 14:00:35	2021-03-29 14:17:00	17	2021-03-29 14:13:25	4	2021-03-29 14:50:00	2021-03-29 15:04:00	14	2021-03-29 15:07:00	2021-03-29 16:30:00	64	83	0	0	0	0	0	1	0	1	0	0	0	2	NULL	NULL	NULL	NULL	NULL	NULL	NULL	NULL	NULL	NULL	NULL	NULL	NULL	NULL	NULL	NULL	NULL	NULL	NULL	NULL	NULL
Anesthesia	Male	69	30.54	Lower GI	2021-09-20 10:10:38	2021-09-20 10:15:00	5	2021-09-20 10:07:00	8	2021-09-20 10:24:00	2021-09-20 10:28:22	4	2021-09-20 10:34:00	2021-09-20 11:04:00	18	30	1	0	0	1	0	1	0	0	0	0	0	3	NULL	NULL	NULL	NULL	NULL	NULL	NULL	NULL	NULL	NULL	NULL	NULL	NULL	NULL	NULL	NULL	NULL	NULL	NULL	NULL	NULL
Nursing	Female	68	26.93	DUAL	2021-01-27 14:09:58	2021-01-27 14:26:00	17	2021-01-27 14:16:00	10	2021-01-27 14:30:00	2021-01-27 14:50:59	20	2021-01-27 15:00:00	2021-01-27 15:38:00	41	38	0	1	0	1	0	0	0	0	0	0	0	2	NULL	NULL	NULL	NULL	NULL	NULL	NULL	NULL	NULL	NULL	NULL	NULL	NULL	NULL	NULL	NULL	NULL	NULL	NULL	NULL	NULL
Anesthesia	Male	69	32.31	Lower GI	2021-08-12 13:16:45	2021-08-12 13:20:00	4	2021-08-12 13:14:00	6	2021-08-12 13:32:00	2021-08-12 13:37:05	5	2021-08-12 13:40:00	2021-08-12 14:30:00	21	50	0	0	0	0	0	0	0	0	0	0	0	0	NULL	NULL	NULL	NULL	NULL	NULL	NULL	NULL	NULL	NULL	NULL	NULL	NULL	NULL	NULL	NULL	NULL	NULL	NULL	NULL	NULL
Nursing	Male	68	19.94	DUAL	2021-05-21 07:00:00	2021-05-21 07:16:00	16	2021-05-21 07:11:00	5	2021-05-21 08:19:00	2021-05-21 08:25:13	6	2021-05-21 08:30:00	2021-05-21 09:50:00	85	80	0	0	0	0	0	0	0	0	0	0	0	0	NULL	NULL	NULL	NULL	NULL	NULL	NULL	NULL	NULL	NULL	NULL	NULL	NULL	NULL	NULL	NULL	NULL	NULL	NULL	NULL	NULL
Nursing	Male	67	19.94	DUAL	2020-02-21 09:19:46	2020-02-21 09:30:00	11	2020-02-21 09:23:00	7	2020-02-21 10:06:00	2020-02-21 10:10:00	4	2020-02-21 10:16:00	2020-02-21 11:01:00	51	45	0	0	0	0	0	0	0	0	0	0	0	0	NULL	NULL	NULL	NULL	NULL	NULL	NULL	NULL	NULL	NULL	NULL	NULL	NULL	NULL	NULL	NULL	NULL	NULL	NULL	NULL	NULL
Nursing	Female	65	23.63	DUAL	2020-07-07 10:21:19	2020-07-07 10:49:00	28	2020-07-07 10:40:51	9	2020-07-07 11:14:00	2020-07-07 11:17:59	3	2020-07-07 11:24:00	2020-07-07 12:30:00	56	66	0	0	0	0	0	1	1	0	0	1	0	3	NULL	NULL	NULL	NULL	NULL	NULL	NULL	NULL	NULL	NULL	NULL	NULL	NULL	NULL	NULL	NULL	NULL	NULL	NULL	NULL	NULL
Nursing	Male	70	26.65	Lower GI	2020-02-28 11:58:35	2020-02-28 12:23:00	25	2020-02-28 12:14:33	9	2020-02-28 13:01:00	2020-02-28 13:06:07	5	2020-02-28 13:09:00	2020-02-28 13:32:00	68	23	0	0	0	0	0	1	0	0	0	0	0	1	NULL	NULL	NULL	NULL	NULL	NULL	NULL	NULL	NULL	NULL	NULL	NULL	NULL	NULL	NULL	NULL	NULL	NULL	NULL	NULL	NULL
Nursing	Male	68	23.99	Lower GI	2020-01-21 07:26:43	2020-01-21 08:10:00	44	2020-01-21 07:59:28	11	2020-01-21 08:31:00	2020-01-21 08:34:08	3	2020-01-21 08:40:00	2020-01-21 10:00:00	68	80	0	0	0	0	0	1	1	1	1	1	0	5	NULL	NULL	NULL	NULL	NULL	NULL	NULL	NULL	NULL	NULL	NULL	NULL	NULL	NULL	NULL	NULL	NULL	NULL	NULL	NULL	NULL
Nursing	Male	65	28.37	Upper GI	2020-08-25 11:38:41	2020-08-25 12:10:00	32	2020-08-25 12:00:10	10	2020-08-25 12:13:00	2020-08-25 12:17:01	4	2020-08-25 12:23:00	2020-08-25 12:41:00	39	18	0	0	0	0	0	0	0	1	0	0	0	1	NULL	NULL	NULL	NULL	NULL	NULL	NULL	NULL	NULL	NULL	NULL	NULL	NULL	NULL	NULL	NULL	NULL	NULL	NULL	NULL	NULL
Nursing	Female	59	35.78	DUAL	2020-10-01 06:39:42	2020-10-01 07:18:00	39	2020-10-01 07:07:56	11	2020-10-01 07:56:00	2020-10-01 08:00:16	4	2020-10-01 08:07:00	2020-10-01 09:09:00	81	62	0	0	0	1	0	0	0	0	0	0	0	1	NULL	NULL	NULL	NULL	NULL	NULL	NULL	NULL	NULL	NULL	NULL	NULL	NULL	NULL	NULL	NULL	NULL	NULL	NULL	NULL	NULL
Nursing	Female	59	35.78	Upper GI	2020-06-02 09:13:35	2020-06-02 09:29:00	16	2020-06-02 09:21:00	8	2020-06-02 09:34:00	2020-06-02 09:38:05	4	2020-06-02 09:42:00	2020-06-02 10:32:00	25	50	0	0	0	1	0	0	0	0	0	0	0	1	NULL	NULL	NULL	NULL	NULL	NULL	NULL	NULL	NULL	NULL	NULL	NULL	NULL	NULL	NULL	NULL	NULL	NULL	NULL	NULL	NULL
Nursing	Female	59	36.22	Upper GI	2020-11-23 12:53:56	2020-11-23 13:24:00	31	2020-11-23 13:14:17	10	2020-11-23 13:33:00	2020-11-23 13:34:58	1	2020-11-23 13:42:00	2020-11-23 14:10:00	41	28	0	0	0	1	0	0	0	0	0	0	0	1	NULL	NULL	NULL	NULL	NULL	NULL	NULL	NULL	NULL	NULL	NULL	NULL	NULL	NULL	NULL	NULL	NULL	NULL	NULL	NULL	NULL
Anesthesia	Female	62	18.64	Lower GI	2021-10-21 13:06:56	2021-10-21 13:10:00	4	2021-10-21 13:06:00	4	2021-10-21 13:30:00	2021-10-21 13:32:21	2	2021-10-21 13:35:00	2021-10-21 14:07:00	26	32	0	0	0	0	0	1	0	0	0	0	0	1	NULL	NULL	NULL	NULL	NULL	NULL	NULL	NULL	NULL	NULL	NULL	NULL	NULL	NULL	NULL	NULL	NULL	NULL	NULL	NULL	NULL
Nursing	Female	47	25.82	Lower GI	2021-04-06 11:26:00	2021-04-06 11:39:00	13	2021-04-06 11:32:00	7	2021-04-06 12:20:00	2021-04-06 12:21:24	1	2021-04-06 12:28:00	2021-04-06 13:04:00	55	36	NULL	NULL	NULL	NULL	NULL	NULL	NULL	NULL	NULL	NULL	NULL	0	NULL	NULL	NULL	NULL	NULL	NULL	NULL	NULL	NULL	NULL	NULL	NULL	NULL	NULL	NULL	NULL	NULL	NULL	NULL	NULL	NULL
Nursing	Female	65	33.99	Lower GI	2021-06-03 06:56:09	2021-06-03 07:10:00	14	2021-06-03 07:02:22	8	2021-06-03 07:31:00	2021-06-03 07:35:05	4	2021-06-03 07:39:00	2021-06-03 08:12:00	39	33	0	0	0	1	0	1	0	0	0	0	0	2	NULL	NULL	NULL	NULL	NULL	NULL	NULL	NULL	NULL	NULL	NULL	NULL	NULL	NULL	NULL	NULL	NULL	NULL	NULL	NULL	NULL
Nursing	Male	52	27.39	DUAL	2021-02-11 14:08:08	2021-02-11 14:40:00	32	2021-02-11 14:26:00	14	2021-02-11 15:11:00	2021-02-11 15:13:58	2	2021-02-11 15:21:00	2021-02-11 16:00:00	65	39	0	0	0	1	0	0	0	0	0	0	0	1	NULL	NULL	NULL	NULL	NULL	NULL	NULL	NULL	NULL	NULL	NULL	NULL	NULL	NULL	NULL	NULL	NULL	NULL	NULL	NULL	NULL
Nursing	Female	57	37.2	Lower GI	2020-11-13 09:51:16	2020-11-13 09:56:00	5	2020-11-13 09:51:00	5	2020-11-13 10:11:00	2020-11-13 10:14:36	3	2020-11-13 10:20:00	2020-11-13 11:07:00	23	47	1	0	0	1	0	1	0	1	0	0	1	5	NULL	NULL	NULL	NULL	NULL	NULL	NULL	NULL	NULL	NULL	NULL	NULL	NULL	NULL	NULL	NULL	NULL	NULL	NULL	NULL	NULL
Nursing	Female	57	21.95	Lower GI	2020-07-14 09:24:45	2020-07-14 10:13:00	49	2020-07-14 10:04:00	9	2020-07-14 10:45:00	2020-07-14 10:47:22	2	2020-07-14 10:50:00	2020-07-14 11:29:00	83	39	0	1	0	1	0	1	0	0	0	0	0	3	NULL	NULL	NULL	NULL	NULL	NULL	NULL	NULL	NULL	NULL	NULL	NULL	NULL	NULL	NULL	NULL	NULL	NULL	NULL	NULL	NULL
Nursing	Female	45	32.12	Upper GI	2020-06-15 15:40:44	2020-06-15 16:02:00	22	2020-06-15 15:50:26	12	2020-06-15 16:06:00	2020-06-15 16:12:09	6	2020-06-15 16:18:00	2020-06-15 16:58:00	32	40	NULL	NULL	NULL	NULL	NULL	NULL	NULL	NULL	NULL	NULL	NULL	0	NULL	NULL	NULL	NULL	NULL	NULL	NULL	NULL	NULL	NULL	NULL	NULL	NULL	NULL	NULL	NULL	NULL	NULL	NULL	NULL	NULL
Nursing	Female	74	24.55	DUAL	2020-01-14 07:59:54	2020-01-14 08:17:00	18	2020-01-14 08:10:03	7	2020-01-14 09:17:00	2020-01-14 09:22:14	5	2020-01-14 09:29:00	2020-01-14 09:56:00	83	27	0	1	0	0	0	0	1	0	0	1	0	3	NULL	NULL	NULL	NULL	NULL	NULL	NULL	NULL	NULL	NULL	NULL	NULL	NULL	NULL	NULL	NULL	NULL	NULL	NULL	NULL	NULL
Nursing	Female	60	21.61	Lower GI	2020-11-09 15:08:00	2020-11-09 15:36:00	28	2020-11-09 15:16:41	20	2020-11-09 15:51:00	2020-11-09 15:54:44	3	2020-11-09 16:00:00	2020-11-09 16:30:00	46	30	NULL	NULL	NULL	NULL	NULL	NULL	NULL	NULL	NULL	NULL	NULL	0	NULL	NULL	NULL	NULL	NULL	NULL	NULL	NULL	NULL	NULL	NULL	NULL	NULL	NULL	NULL	NULL	NULL	NULL	NULL	NULL	NULL
Anesthesia	Female	59	18.79	Lower GI	2021-08-19 09:03:18	2021-08-19 09:09:00	6	2021-08-19 09:02:00	7	2021-08-19 09:28:00	2021-08-19 09:32:09	4	2021-08-19 09:30:00	2021-08-19 10:10:00	29	40	1	0	0	0	0	1	0	0	0	0	0	2	NULL	NULL	NULL	NULL	NULL	NULL	NULL	NULL	NULL	NULL	NULL	NULL	NULL	NULL	NULL	NULL	NULL	NULL	NULL	NULL	NULL
Nursing	Female	74	21.26	Upper GI	2020-09-22 07:29:23	2020-09-22 07:47:00	18	2020-09-22 07:40:31	7	2020-09-22 07:59:00	2020-09-22 08:03:41	4	2020-09-22 08:10:00	2020-09-22 08:45:00	34	35	0	0	0	1	0	1	0	0	0	0	0	2	NULL	NULL	NULL	NULL	NULL	NULL	NULL	NULL	NULL	NULL	NULL	NULL	NULL	NULL	NULL	NULL	NULL	NULL	NULL	NULL	NULL
Nursing	Female	70	30.3	Lower GI	2021-04-14 08:24:29	2021-04-14 08:42:00	18	2021-04-14 08:34:30	8	2021-04-14 08:58:00	2021-04-14 09:02:00	4	2021-04-14 09:07:00	2021-04-14 09:45:00	38	38	0	0	0	1	0	1	0	0	0	0	0	2	NULL	NULL	NULL	NULL	NULL	NULL	NULL	NULL	NULL	NULL	NULL	NULL	NULL	NULL	NULL	NULL	NULL	NULL	NULL	NULL	NULL
Nursing	Female	79	25.4	Lower GI	2020-08-19 13:01:54	2020-08-19 13:17:00	16	2020-08-19 13:08:26	9	2020-08-19 13:36:00	2020-08-19 13:39:17	3	2020-08-19 13:42:00	2020-08-19 14:10:00	38	28	0	0	0	1	0	0	0	0	0	0	0	1	NULL	NULL	NULL	NULL	NULL	NULL	NULL	NULL	NULL	NULL	NULL	NULL	NULL	NULL	NULL	NULL	NULL	NULL	NULL	NULL	NULL
Nursing	Male	81	26.94	Lower GI	2020-08-12 12:46:29	2020-08-12 13:04:00	18	2020-08-12 13:01:49	3	2020-08-12 13:31:00	2020-08-12 13:32:58	1	2020-08-12 13:38:00	2020-08-12 14:50:00	46	72	0	0	0	0	0	1	1	0	0	1	0	3	NULL	NULL	NULL	NULL	NULL	NULL	NULL	NULL	NULL	NULL	NULL	NULL	NULL	NULL	NULL	NULL	NULL	NULL	NULL	NULL	NULL
Nursing	Female	59	19.53	Lower GI	2020-11-06 09:30:06	2020-11-06 09:56:00	26	2020-11-06 09:50:07	6	2020-11-06 10:24:00	2020-11-06 10:27:49	3	2020-11-06 10:34:00	2020-11-06 11:07:00	57	33	0	1	0	0	0	0	0	0	0	0	0	1	NULL	NULL	NULL	NULL	NULL	NULL	NULL	NULL	NULL	NULL	NULL	NULL	NULL	NULL	NULL	NULL	NULL	NULL	NULL	NULL	NULL
Nursing	Male	63	36.49	Lower GI	2020-08-25 10:18:46	2020-08-25 10:56:00	38	2020-08-25 10:47:41	9	2020-08-25 11:18:00	2020-08-25 11:20:19	2	2020-08-25 11:26:00	2020-08-25 11:45:00	62	19	0	0	0	1	0	1	0	0	0	0	0	2	NULL	NULL	NULL	NULL	NULL	NULL	NULL	NULL	NULL	NULL	NULL	NULL	NULL	NULL	NULL	NULL	NULL	NULL	NULL	NULL	NULL
Nursing	Female	64	24.56	Lower GI	2021-05-13 07:13:34	2021-05-13 07:45:00	32	2021-05-13 07:39:20	6	2021-05-13 08:05:00	2021-05-13 08:09:49	4	2021-05-13 08:14:00	2021-05-13 08:53:00	56	39	NULL	NULL	NULL	NULL	NULL	NULL	NULL	NULL	NULL	NULL	NULL	0	NULL	NULL	NULL	NULL	NULL	NULL	NULL	NULL	NULL	NULL	NULL	NULL	NULL	NULL	NULL	NULL	NULL	NULL	NULL	NULL	NULL
Nursing	Female	56	23.24	Lower GI	2021-05-14 09:18:59	2021-05-14 10:00:00	42	2021-05-14 09:51:28	9	2021-05-14 10:25:00	2021-05-14 10:26:21	1	2021-05-14 10:34:00	2021-05-14 11:08:00	68	34	NULL	NULL	NULL	NULL	NULL	NULL	NULL	NULL	NULL	NULL	NULL	0	NULL	NULL	NULL	NULL	NULL	NULL	NULL	NULL	NULL	NULL	NULL	NULL	NULL	NULL	NULL	NULL	NULL	NULL	NULL	NULL	NULL
Nursing	Female	78	26.63	Lower GI	2020-01-17 08:13:15	2020-01-17 08:55:00	42	2020-01-17 08:47:45	8	2020-01-17 09:13:00	2020-01-17 09:14:29	1	2020-01-17 09:25:00	2020-01-17 09:50:00	61	25	0	0	0	1	0	1	0	0	0	0	1	3	NULL	NULL	NULL	NULL	NULL	NULL	NULL	NULL	NULL	NULL	NULL	NULL	NULL	NULL	NULL	NULL	NULL	NULL	NULL	NULL	NULL
Nursing	Female	76	20.18	Lower GI	2021-01-14 10:48:00	2021-01-14 11:09:00	21	2021-01-14 10:55:00	14	2021-01-14 11:43:00	2021-01-14 11:48:58	5	2021-01-14 11:56:00	2021-01-14 12:51:00	60	55	0	1	1	0	0	1	0	0	0	0	0	3	NULL	NULL	NULL	NULL	NULL	NULL	NULL	NULL	NULL	NULL	NULL	NULL	NULL	NULL	NULL	NULL	NULL	NULL	NULL	NULL	NULL
Anesthesia	Male	55	19.66	Lower GI	2021-10-21 14:23:29	2021-10-21 14:26:00	3	2021-10-21 14:21:00	5	2021-10-21 14:44:00	2021-10-21 14:46:52	2	2021-10-21 14:51:00	2021-10-21 15:41:00	23	50	0	0	0	1	0	1	0	0	0	0	0	2	NULL	NULL	NULL	NULL	NULL	NULL	NULL	NULL	NULL	NULL	NULL	NULL	NULL	NULL	NULL	NULL	NULL	NULL	NULL	NULL	NULL
Nursing	Female	23	17.97	Lower GI	2020-07-10 11:22:08	2020-07-10 11:43:00	21	2020-07-10 11:34:07	9	2020-07-10 12:00:00	2020-07-10 12:04:52	4	2020-07-10 12:01:00	2020-07-10 13:23:00	42	82	NULL	NULL	NULL	NULL	NULL	NULL	NULL	NULL	NULL	NULL	NULL	0	NULL	NULL	NULL	NULL	NULL	NULL	NULL	NULL	NULL	NULL	NULL	NULL	NULL	NULL	NULL	NULL	NULL	NULL	NULL	NULL	NULL
Nursing	Male	50	21.7	Lower GI	2020-07-01 15:39:10	2020-07-01 16:07:00	28	2020-07-01 15:55:38	12	2020-07-01 16:35:00	2020-07-01 16:40:18	5	2020-07-01 16:44:00	2020-07-01 17:00:00	61	16	NULL	NULL	NULL	NULL	NULL	NULL	NULL	NULL	NULL	NULL	NULL	0	NULL	NULL	NULL	NULL	NULL	NULL	NULL	NULL	NULL	NULL	NULL	NULL	NULL	NULL	NULL	NULL	NULL	NULL	NULL	NULL	NULL
Nursing	Female	54	32.28	DUAL	2021-02-25 07:08:17	2021-02-25 07:26:00	18	2021-02-25 07:18:00	8	2021-02-25 08:20:00	2021-02-25 08:23:09	3	2021-02-25 08:31:00	2021-02-25 09:01:00	75	30	0	0	0	1	0	0	0	0	0	0	0	1	NULL	NULL	NULL	NULL	NULL	NULL	NULL	NULL	NULL	NULL	NULL	NULL	NULL	NULL	NULL	NULL	NULL	NULL	NULL	NULL	NULL
Nursing	Male	61	23.75	Lower GI	2020-01-14 07:00:34	2020-01-14 07:46:00	46	2020-01-14 07:39:17	7	2020-01-14 08:42:00	2020-01-14 08:44:55	2	2020-01-14 08:51:00	2020-01-14 09:30:00	104	39	0	0	0	0	0	0	1	0	0	1	0	2	NULL	NULL	NULL	NULL	NULL	NULL	NULL	NULL	NULL	NULL	NULL	NULL	NULL	NULL	NULL	NULL	NULL	NULL	NULL	NULL	NULL
Nursing	Female	75	43.53	Lower GI	2021-05-26 12:52:56	2021-05-26 13:09:00	17	2021-05-26 12:59:41	10	2021-05-26 13:28:00	2021-05-26 13:34:07	6	2021-05-26 13:39:00	2021-05-26 13:56:00	42	17	0	0	0	0	0	1	0	0	0	0	0	1	NULL	NULL	NULL	NULL	NULL	NULL	NULL	NULL	NULL	NULL	NULL	NULL	NULL	NULL	NULL	NULL	NULL	NULL	NULL	NULL	NULL
Nursing	Male	70	25.84	DUAL	2020-10-08 10:49:57	2020-10-08 11:15:00	26	2020-10-08 11:06:23	9	2020-10-08 11:46:00	2020-10-08 11:48:32	2	2020-10-08 12:00:00	2020-10-08 12:45:00	59	45	0	1	0	1	0	1	0	0	0	0	0	3	NULL	NULL	NULL	NULL	NULL	NULL	NULL	NULL	NULL	NULL	NULL	NULL	NULL	NULL	NULL	NULL	NULL	NULL	NULL	NULL	NULL
Nursing	Female	75	26.07	Lower GI	2021-01-27 13:28:13	2021-01-27 13:42:00	14	2021-01-27 13:37:00	5	2021-01-27 14:05:00	2021-01-27 14:10:00	5	2021-01-27 14:16:00	2021-01-27 14:50:00	42	34	0	0	0	0	0	0	0	0	0	0	1	1	NULL	NULL	NULL	NULL	NULL	NULL	NULL	NULL	NULL	NULL	NULL	NULL	NULL	NULL	NULL	NULL	NULL	NULL	NULL	NULL	NULL
Anesthesia	Female	79	33.13	DUAL	2021-09-27 14:35:39	2021-09-27 14:42:00	7	2021-09-27 14:34:00	8	2021-09-27 15:13:00	2021-09-27 15:20:42	7	2021-09-27 15:30:00	2021-09-27 16:12:00	45	42	1	1	0	0	0	1	0	0	0	0	0	3	NULL	NULL	NULL	NULL	NULL	NULL	NULL	NULL	NULL	NULL	NULL	NULL	NULL	NULL	NULL	NULL	NULL	NULL	NULL	NULL	NULL
Nursing	Male	69	27.32	Upper GI	2020-01-29 13:42:44	2020-01-29 13:59:00	17	2020-01-29 13:53:57	6	2020-01-29 14:05:00	2020-01-29 14:10:15	5	2020-01-29 14:15:00	2020-01-29 14:45:00	28	30	0	0	0	0	0	1	1	0	0	1	0	3	NULL	NULL	NULL	NULL	NULL	NULL	NULL	NULL	NULL	NULL	NULL	NULL	NULL	NULL	NULL	NULL	NULL	NULL	NULL	NULL	NULL
Anesthesia	Female	63	42.97	Lower GI	2021-08-25 13:13:26	2021-08-25 13:50:00	37	2021-08-25 13:44:00	6	2021-08-25 14:06:00	2021-08-25 14:07:12	1	2021-08-25 14:15:00	2021-08-25 14:58:00	54	43	NULL	NULL	NULL	NULL	NULL	NULL	NULL	NULL	NULL	NULL	NULL	0	NULL	NULL	NULL	NULL	NULL	NULL	NULL	NULL	NULL	NULL	NULL	NULL	NULL	NULL	NULL	NULL	NULL	NULL	NULL	NULL	NULL
Nursing	Female	73	20.18	Lower GI	2020-01-10 10:49:09	2020-01-10 11:20:00	31	2020-01-10 11:12:00	8	2020-01-10 11:38:00	2020-01-10 11:45:00	7	2020-01-10 11:50:00	2020-01-10 12:00:00	56	10	NULL	NULL	NULL	NULL	NULL	NULL	NULL	NULL	NULL	NULL	NULL	0	NULL	NULL	NULL	NULL	NULL	NULL	NULL	NULL	NULL	NULL	NULL	NULL	NULL	NULL	NULL	NULL	NULL	NULL	NULL	NULL	NULL
Nursing	Female	57	22.85	Lower GI	2020-02-13 09:24:36	2020-02-13 09:56:00	32	2020-02-13 09:45:58	11	2020-02-13 10:11:00	2020-02-13 10:12:56	1	2020-02-13 10:23:00	2020-02-13 10:56:00	48	33	0	1	0	0	0	0	0	0	0	0	0	1	NULL	NULL	NULL	NULL	NULL	NULL	NULL	NULL	NULL	NULL	NULL	NULL	NULL	NULL	NULL	NULL	NULL	NULL	NULL	NULL	NULL
Nursing	Female	69	23.62	Upper GI	2020-07-22 10:03:20	2020-07-22 10:23:00	20	2020-07-22 10:17:40	6	2020-07-22 10:35:00	2020-07-22 10:41:37	6	2020-07-22 10:49:00	2020-07-22 12:13:00	38	84	0	0	0	0	0	0	0	1	0	0	0	1	NULL	NULL	NULL	NULL	NULL	NULL	NULL	NULL	NULL	NULL	NULL	NULL	NULL	NULL	NULL	NULL	NULL	NULL	NULL	NULL	NULL
Anesthesia	Female	48	33.11	Lower GI	2021-10-07 08:04:22	2021-10-07 08:08:00	4	2021-10-07 08:01:00	7	2021-10-07 08:35:00	2021-10-07 08:38:37	3	2021-10-07 08:41:00	2021-10-07 09:00:00	34	19	NULL	NULL	NULL	NULL	NULL	NULL	NULL	NULL	NULL	NULL	NULL	0	NULL	NULL	NULL	NULL	NULL	NULL	NULL	NULL	NULL	NULL	NULL	NULL	NULL	NULL	NULL	NULL	NULL	NULL	NULL	NULL	NULL
Nursing	Male	75	36.68	Lower GI	2020-08-12 12:50:35	2020-08-12 13:00:00	10	2020-08-12 12:55:43	5	2020-08-12 13:31:00	2020-08-12 13:35:57	4	2020-08-12 13:40:00	2020-08-12 14:12:00	45	32	1	1	0	1	0	1	0	0	0	0	0	4	NULL	NULL	NULL	NULL	NULL	NULL	NULL	NULL	NULL	NULL	NULL	NULL	NULL	NULL	NULL	NULL	NULL	NULL	NULL	NULL	NULL
Nursing	Male	78	25.83	Lower GI	2021-05-14 11:37:03	2021-05-14 12:11:00	34	2021-05-14 12:05:24	6	2021-05-14 12:23:00	2021-05-14 12:26:26	3	2021-05-14 12:33:00	2021-05-14 13:00:00	49	27	0	0	1	0	0	1	1	0	0	1	0	4	NULL	NULL	NULL	NULL	NULL	NULL	NULL	NULL	NULL	NULL	NULL	NULL	NULL	NULL	NULL	NULL	NULL	NULL	NULL	NULL	NULL
Nursing	Female	50	20.94	Lower GI	2021-03-24 08:53:35	2021-03-24 09:08:00	15	2021-03-24 08:59:29	9	2021-03-24 09:28:00	2021-03-24 09:32:48	4	2021-03-24 09:37:00	2021-03-24 10:36:00	39	59	NULL	NULL	NULL	NULL	NULL	NULL	NULL	NULL	NULL	NULL	NULL	0	4	mg	NULL	NULL	NULL	NULL	NULL	NULL	NULL	NULL	NULL	NULL	NULL	NULL	NULL	NULL	NULL	NULL	NULL	NULL	NULL
Nursing	Male	69	29.84	Lower GI	2021-04-15 13:00:14	2021-04-15 13:28:00	28	2021-04-15 13:18:36	10	2021-04-15 14:19:00	2021-04-15 14:25:48	6	2021-04-15 14:32:00	2021-04-15 15:22:00	85	50	0	0	0	0	0	1	0	0	0	0	0	1	NULL	NULL	NULL	NULL	NULL	NULL	NULL	NULL	NULL	NULL	NULL	NULL	NULL	NULL	NULL	NULL	NULL	NULL	NULL	NULL	NULL
Nursing	Male	74	28.89	Lower GI	2020-02-10 08:04:07	2020-02-10 08:23:00	19	2020-02-10 08:17:00	6	2020-02-10 09:02:00	2020-02-10 09:13:17	11	2020-02-10 09:10:00	2020-02-10 09:50:00	69	40	0	0	0	1	0	0	0	0	0	0	0	1	NULL	NULL	NULL	NULL	NULL	NULL	NULL	NULL	NULL	NULL	NULL	NULL	NULL	NULL	NULL	NULL	NULL	NULL	NULL	NULL	NULL
Nursing	Male	68	22.32	DUAL	2021-02-24 14:17:10	2021-02-24 14:52:00	35	2021-02-24 14:38:00	14	2021-02-24 15:16:00	2021-02-24 15:21:29	5	2021-02-24 15:24:00	2021-02-24 16:26:00	64	62	0	0	0	0	0	1	0	0	0	0	0	1	NULL	NULL	NULL	NULL	NULL	NULL	NULL	NULL	NULL	NULL	NULL	NULL	NULL	NULL	NULL	NULL	NULL	NULL	NULL	NULL	NULL
Nursing	Female	79	18.25	Upper GI	2021-03-02 07:42:43	2021-03-02 08:29:00	47	2021-03-02 08:21:54	8	2021-03-02 08:39:00	2021-03-02 08:41:23	2	2021-03-02 08:46:00	2021-03-02 09:00:00	59	14	0	0	0	0	0	1	1	0	0	1	0	3	NULL	NULL	NULL	NULL	NULL	NULL	NULL	NULL	NULL	NULL	NULL	NULL	NULL	NULL	NULL	NULL	NULL	NULL	NULL	NULL	NULL
Nursing	Male	28	21.27	Upper GI	2020-01-29 16:09:39	2020-01-29 16:26:00	17	2020-01-29 16:17:59	9	2020-01-29 16:28:00	2020-01-29 16:32:00	4	2020-01-29 16:50:00	2020-01-29 19:06:00	23	136	0	0	0	1	0	1	1	0	0	1	0	4	NULL	NULL	NULL	NULL	NULL	NULL	NULL	NULL	NULL	NULL	NULL	NULL	NULL	NULL	NULL	NULL	NULL	NULL	NULL	NULL	NULL
Nursing	Female	62	28.29	Upper GI	2020-07-28 08:40:02	2020-07-28 08:59:00	19	2020-07-28 08:48:06	11	2020-07-28 09:04:00	2020-07-28 09:08:19	4	2020-07-28 09:12:00	2020-07-28 09:45:00	28	33	NULL	NULL	NULL	NULL	NULL	NULL	NULL	NULL	NULL	NULL	NULL	0	NULL	NULL	NULL	NULL	NULL	NULL	NULL	NULL	NULL	NULL	NULL	NULL	NULL	NULL	NULL	NULL	NULL	NULL	NULL	NULL	NULL
Nursing	Male	56	29.46	Upper GI	2021-04-14 08:49:05	2021-04-14 09:13:00	24	2021-04-14 09:06:46	7	2021-04-14 09:16:00	2021-04-14 09:19:55	3	2021-04-14 09:22:00	2021-04-14 10:31:00	30	69	0	0	0	0	0	0	0	1	0	0	0	1	NULL	NULL	NULL	NULL	NULL	NULL	NULL	NULL	NULL	NULL	NULL	NULL	NULL	NULL	NULL	NULL	NULL	NULL	NULL	NULL	NULL
Nursing	Female	35	18.75	Upper GI	2021-03-26 10:02:16	2021-03-26 10:24:00	22	2021-03-26 10:18:12	6	2021-03-26 10:29:00	2021-03-26 10:32:00	3	2021-03-26 10:39:00	2021-03-26 11:35:00	30	56	0	1	0	0	0	0	0	0	0	0	1	2	NULL	NULL	NULL	NULL	NULL	NULL	NULL	NULL	NULL	NULL	NULL	NULL	NULL	NULL	NULL	NULL	NULL	NULL	NULL	NULL	NULL
Nursing	Male	82	25.31	Lower GI	2020-02-27 10:18:04	2020-02-27 10:26:00	8	2020-02-27 10:21:00	5	2020-02-27 10:55:00	2020-02-27 11:12:46	17	2020-02-27 11:05:00	2020-02-27 11:45:00	54	40	1	0	1	1	0	1	1	0	0	1	0	6	NULL	NULL	NULL	NULL	NULL	NULL	NULL	NULL	NULL	NULL	NULL	NULL	NULL	NULL	NULL	NULL	NULL	NULL	NULL	NULL	NULL
Nursing	Female	63	28.87	Lower GI	2020-06-23 07:37:01	2020-06-23 08:07:00	30	2020-06-23 07:56:14	11	2020-06-23 08:31:00	2020-06-23 08:34:11	3	2020-06-23 08:40:00	2020-06-23 09:07:00	57	27	0	0	1	1	1	1	0	1	0	0	0	5	NULL	NULL	NULL	NULL	NULL	NULL	NULL	NULL	NULL	NULL	NULL	NULL	NULL	NULL	NULL	NULL	NULL	NULL	NULL	NULL	NULL
Nursing	Female	62	27.41	Lower GI	2021-02-18 07:42:36	2021-02-18 08:21:00	39	2021-02-18 08:14:00	7	2021-02-18 08:37:00	2021-02-18 08:40:03	3	2021-02-18 08:43:00	2021-02-18 09:26:00	58	43	NULL	NULL	NULL	NULL	NULL	NULL	NULL	NULL	NULL	NULL	NULL	0	NULL	NULL	NULL	NULL	NULL	NULL	NULL	NULL	NULL	NULL	NULL	NULL	NULL	NULL	NULL	NULL	NULL	NULL	NULL	NULL	NULL
Nursing	Female	54	25.18	Lower GI	2021-04-29 13:52:22	2021-04-29 14:06:00	14	2021-04-29 13:56:02	10	2021-04-29 14:31:00	2021-04-29 14:33:38	2	2021-04-29 14:41:00	2021-04-29 15:40:00	41	59	NULL	NULL	NULL	NULL	NULL	NULL	NULL	NULL	NULL	NULL	NULL	0	NULL	NULL	NULL	NULL	NULL	NULL	NULL	NULL	NULL	NULL	NULL	NULL	NULL	NULL	NULL	NULL	NULL	NULL	NULL	NULL	NULL
Nursing	Female	48	17.34	Upper GI	2020-08-11 07:24:41	2020-08-11 07:56:00	32	2020-08-11 07:48:09	8	2020-08-11 08:00:00	2020-08-11 08:03:33	3	2020-08-11 08:07:00	2020-08-11 08:50:00	39	43	1	0	0	0	0	0	0	1	0	0	0	2	NULL	NULL	NULL	NULL	NULL	NULL	NULL	NULL	NULL	NULL	NULL	NULL	NULL	NULL	NULL	NULL	NULL	NULL	NULL	NULL	NULL
Nursing	Male	80	25.84	Upper GI	2020-06-24 07:21:22	2020-06-24 07:36:00	15	2020-06-24 07:30:53	6	2020-06-24 07:42:00	2020-06-24 07:44:19	2	2020-06-24 07:51:00	2020-06-24 08:28:00	23	37	0	0	0	0	0	1	1	1	0	1	0	4	NULL	NULL	NULL	NULL	NULL	NULL	NULL	NULL	NULL	NULL	NULL	NULL	NULL	NULL	NULL	NULL	NULL	NULL	NULL	NULL	NULL
Nursing	Male	80	24.59	Upper GI	2020-02-10 14:29:42	2020-02-10 14:58:00	29	2020-02-10 14:47:26	11	2020-02-10 15:02:00	2020-02-10 15:04:20	2	2020-02-10 15:11:00	2020-02-10 15:26:00	35	15	0	0	0	0	0	1	1	1	0	1	0	4	NULL	NULL	NULL	NULL	NULL	NULL	NULL	NULL	NULL	NULL	NULL	NULL	NULL	NULL	NULL	NULL	NULL	NULL	NULL	NULL	NULL
Nursing	Male	60	19.92	Upper GI	2021-04-07 16:24:30	2021-04-07 16:40:00	16	2021-04-07 16:30:00	10	2021-04-07 16:55:00	2021-04-07 17:00:00	5	2021-04-07 17:12:00	2021-04-07 17:54:00	36	42	0	0	0	1	0	0	0	0	0	0	0	1	4	mg	NULL	NULL	NULL	NULL	NULL	NULL	NULL	NULL	NULL	NULL	NULL	NULL	NULL	NULL	NULL	NULL	NULL	NULL	NULL
Anesthesia	Female	64	28.35	Lower GI	2021-10-25 12:51:37	2021-10-25 12:59:00	8	2021-10-25 12:53:00	6	2021-10-25 13:11:00	2021-10-25 13:14:07	3	2021-10-25 13:18:00	2021-10-25 13:38:00	23	20	0	1	0	0	0	0	0	0	0	0	0	1	NULL	NULL	NULL	NULL	NULL	NULL	NULL	NULL	NULL	NULL	NULL	NULL	NULL	NULL	NULL	NULL	NULL	NULL	NULL	NULL	NULL
Anesthesia	Female	75	28.28	Lower GI	2021-09-07 09:36:49	2021-09-07 09:45:00	9	2021-09-07 09:36:00	9	2021-09-07 10:07:00	2021-09-07 10:12:57	5	2021-09-07 10:15:00	2021-09-07 10:49:00	36	34	0	1	0	1	0	1	0	0	0	0	0	3	NULL	NULL	NULL	NULL	NULL	NULL	NULL	NULL	NULL	NULL	NULL	NULL	NULL	NULL	NULL	NULL	NULL	NULL	NULL	NULL	NULL
Nursing	Female	64	24.8	Upper GI	2020-10-13 12:51:04	2020-10-13 13:49:00	58	2020-10-13 13:38:43	11	2020-10-13 13:52:00	2020-10-13 13:53:51	1	2020-10-13 14:01:00	2020-10-13 14:32:00	62	31	0	0	0	0	0	0	0	1	0	0	0	1	NULL	NULL	NULL	NULL	NULL	NULL	NULL	NULL	NULL	NULL	NULL	NULL	NULL	NULL	NULL	NULL	NULL	NULL	NULL	NULL	NULL
Nursing	Male	74	21.54	Lower GI	2021-06-29 10:17:35	2021-06-29 10:44:00	27	2021-06-29 10:39:08	5	2021-06-29 11:05:00	2021-06-29 11:11:14	6	2021-06-29 11:15:00	2021-06-29 12:18:00	54	63	0	0	0	0	0	0	1	0	0	1	0	2	NULL	NULL	NULL	NULL	NULL	NULL	NULL	NULL	NULL	NULL	NULL	NULL	NULL	NULL	NULL	NULL	NULL	NULL	NULL	NULL	NULL
Nursing	Female	64	23.69	Upper GI	2020-06-19 09:42:02	2020-06-19 10:08:00	26	2020-06-19 09:59:00	9	2020-06-19 10:14:00	2020-06-19 10:16:43	2	2020-06-19 10:21:00	2020-06-19 10:38:00	34	17	1	1	0	0	0	1	0	0	0	0	0	3	NULL	NULL	NULL	NULL	NULL	NULL	NULL	NULL	NULL	NULL	NULL	NULL	NULL	NULL	NULL	NULL	NULL	NULL	NULL	NULL	NULL
Nursing	Female	78	29.63	Lower GI	2020-02-06 13:21:34	2020-02-06 13:48:00	27	2020-02-06 13:43:07	5	2020-02-06 14:16:00	2020-02-06 14:20:47	4	2020-02-06 14:24:00	2020-02-06 15:33:00	59	69	0	1	0	1	0	1	1	0	0	1	0	5	NULL	NULL	NULL	NULL	NULL	NULL	NULL	NULL	NULL	NULL	NULL	NULL	NULL	NULL	NULL	NULL	NULL	NULL	NULL	NULL	NULL
Nursing	Male	82	17.75	DUAL	2020-07-29 08:52:28	2020-07-29 09:07:00	15	2020-07-29 09:01:20	6	2020-07-29 09:30:00	2020-07-29 09:34:41	4	2020-07-29 09:40:00	2020-07-29 10:15:00	42	35	0	0	0	1	0	0	0	0	0	0	0	1	NULL	NULL	NULL	NULL	NULL	NULL	NULL	NULL	NULL	NULL	NULL	NULL	NULL	NULL	NULL	NULL	NULL	NULL	NULL	NULL	NULL
Anesthesia	Female	66	32.61	Lower GI	2021-10-25 08:26:09	2021-10-25 08:31:00	5	2021-10-25 08:26:00	5	2021-10-25 09:00:00	2021-10-25 09:03:57	3	2021-10-25 09:05:00	2021-10-25 09:16:00	37	11	0	0	0	0	0	1	0	1	0	0	0	2	NULL	NULL	NULL	NULL	NULL	NULL	NULL	NULL	NULL	NULL	NULL	NULL	NULL	NULL	NULL	NULL	NULL	NULL	NULL	NULL	NULL
Nursing	Female	66	24.96	Lower GI	2021-04-26 15:50:53	2021-04-26 16:52:00	62	2021-04-26 16:34:15	18	2021-04-26 17:18:00	2021-04-26 17:22:00	4	2021-04-26 17:29:00	2021-04-26 17:45:00	92	16	NULL	NULL	NULL	NULL	NULL	NULL	NULL	NULL	NULL	NULL	NULL	0	NULL	NULL	NULL	NULL	NULL	NULL	NULL	NULL	NULL	NULL	NULL	NULL	NULL	NULL	NULL	NULL	NULL	NULL	NULL	NULL	NULL
Nursing	Male	76	28.19	Lower GI	2021-06-29 09:58:18	2021-06-29 10:50:00	52	2021-06-29 10:40:14	10	2021-06-29 11:13:00	2021-06-29 11:16:53	3	2021-06-29 11:22:00	2021-06-29 11:37:00	78	15	1	0	1	1	0	1	0	1	0	0	1	6	NULL	NULL	NULL	NULL	NULL	NULL	NULL	NULL	NULL	NULL	NULL	NULL	NULL	NULL	NULL	NULL	NULL	NULL	NULL	NULL	NULL
Nursing	Male	38	19.53	Lower GI	2021-04-26 14:58:19	2021-04-26 15:22:00	24	2021-04-26 15:06:00	16	2021-04-26 16:19:00	2021-04-26 16:28:05	9	2021-04-26 16:33:00	2021-04-26 17:17:00	90	44	0	0	0	0	0	0	0	1	0	0	0	1	NULL	NULL	NULL	NULL	NULL	NULL	NULL	NULL	NULL	NULL	NULL	NULL	NULL	NULL	NULL	NULL	NULL	NULL	NULL	NULL	NULL
Anesthesia	Female	63	21.61	Lower GI	2021-10-25 08:25:05	2021-10-25 08:36:00	11	2021-10-25 08:30:00	6	2021-10-25 08:55:00	2021-10-25 08:57:14	2	2021-10-25 09:00:00	2021-10-25 09:15:00	32	15	NULL	NULL	NULL	NULL	NULL	NULL	NULL	NULL	NULL	NULL	NULL	0	NULL	NULL	NULL	NULL	NULL	NULL	NULL	NULL	NULL	NULL	NULL	NULL	NULL	NULL	NULL	NULL	NULL	NULL	NULL	NULL	NULL
Nursing	Male	56	27.46	Lower GI	2020-09-02 13:02:56	2020-09-02 13:13:00	11	2020-09-02 13:06:57	7	2020-09-02 13:29:00	2020-09-02 13:38:21	9	2020-09-02 13:36:00	2020-09-02 14:53:00	36	77	0	0	0	0	0	1	0	0	0	0	0	1	NULL	NULL	NULL	NULL	NULL	NULL	NULL	NULL	NULL	NULL	NULL	NULL	NULL	NULL	NULL	NULL	NULL	NULL	NULL	NULL	NULL
Nursing	Female	81	27.05	Lower GI	2021-03-10 06:50:57	2021-03-10 07:19:00	29	2021-03-10 07:13:15	6	2021-03-10 07:51:00	2021-03-10 07:57:52	6	2021-03-10 08:01:00	2021-03-10 08:54:00	67	53	0	1	0	1	0	1	0	0	0	0	0	3	NULL	NULL	NULL	NULL	NULL	NULL	NULL	NULL	NULL	NULL	NULL	NULL	NULL	NULL	NULL	NULL	NULL	NULL	NULL	NULL	NULL
Nursing	Female	46	30.38	DUAL	2020-09-08 09:30:00	2020-09-08 09:40:00	10	2020-09-08 09:34:00	6	2020-09-08 10:18:00	2020-09-08 10:20:47	2	2020-09-08 10:26:00	2020-09-08 11:01:00	50	35	1	1	0	1	0	1	1	1	0	1	0	7	NULL	NULL	NULL	NULL	NULL	NULL	NULL	NULL	NULL	NULL	NULL	NULL	NULL	NULL	NULL	NULL	NULL	NULL	NULL	NULL	NULL
Nursing	Female	86	26.56	Lower GI	2020-07-14 16:01:21	2020-07-14 17:05:00	64	2020-07-14 17:00:47	5	2020-07-14 17:28:00	2020-07-14 17:31:37	3	2020-07-14 17:38:00	2020-07-14 18:00:00	90	22	1	0	0	0	0	0	0	0	0	0	0	1	NULL	NULL	NULL	NULL	NULL	NULL	NULL	NULL	NULL	NULL	NULL	NULL	NULL	NULL	NULL	NULL	NULL	NULL	NULL	NULL	NULL
Nursing	Female	64	30.21	Lower GI	2020-10-30 09:36:35	2020-10-30 10:03:00	27	2020-10-30 09:56:14	7	2020-10-30 10:19:00	2020-10-30 10:24:00	5	2020-10-30 10:30:00	2020-10-30 11:00:00	48	30	0	0	0	1	0	1	0	0	0	0	0	2	NULL	NULL	NULL	NULL	NULL	NULL	NULL	NULL	NULL	NULL	NULL	NULL	NULL	NULL	NULL	NULL	NULL	NULL	NULL	NULL	NULL
Nursing	Female	55	33.93	DUAL	2021-03-23 10:12:34	2021-03-23 10:20:00	8	2021-03-23 10:11:00	9	2021-03-23 11:00:00	2021-03-23 11:04:57	4	2021-03-23 11:10:00	2021-03-23 12:10:00	52	60	0	1	0	1	0	0	0	0	0	0	0	2	NULL	NULL	NULL	NULL	NULL	NULL	NULL	NULL	NULL	NULL	NULL	NULL	NULL	NULL	NULL	NULL	NULL	NULL	NULL	NULL	NULL
Anesthesia	Male	72	37.66	DUAL	2021-10-11 15:40:00	2021-10-11 15:48:00	8	2021-10-11 15:39:00	9	2021-10-11 16:29:00	2021-10-11 16:31:00	2	2021-10-11 16:39:00	2021-10-11 17:20:00	51	41	1	0	0	1	0	1	1	1	0	1	0	6	NULL	NULL	NULL	NULL	NULL	NULL	NULL	NULL	NULL	NULL	NULL	NULL	NULL	NULL	NULL	NULL	NULL	NULL	NULL	NULL	NULL
Nursing	Female	75	33.84	Lower GI	2021-01-28 09:34:59	2021-01-28 10:25:00	51	2021-01-28 10:18:00	7	2021-01-28 11:06:00	2021-01-28 11:09:42	3	2021-01-28 11:21:00	2021-01-28 12:11:00	95	50	0	0	0	0	0	1	0	0	0	0	0	1	NULL	NULL	NULL	NULL	NULL	NULL	NULL	NULL	NULL	NULL	NULL	NULL	NULL	NULL	NULL	NULL	NULL	NULL	NULL	NULL	NULL
Nursing	Female	68	24.41	Lower GI	2020-01-30 07:15:26	2020-01-30 08:03:00	48	2020-01-30 07:55:37	8	2020-01-30 08:17:00	2020-01-30 08:28:48	11	2020-01-30 08:26:00	2020-01-30 08:50:00	73	24	0	1	0	1	0	1	0	1	0	0	0	4	NULL	NULL	NULL	NULL	NULL	NULL	NULL	NULL	NULL	NULL	NULL	NULL	NULL	NULL	NULL	NULL	NULL	NULL	NULL	NULL	NULL
Nursing	Female	61	35.07	Lower GI	2021-06-08 07:50:17	2021-06-08 08:32:00	42	2021-06-08 08:24:00	8	2021-06-08 09:02:00	2021-06-08 09:04:38	2	2021-06-08 09:10:00	2021-06-08 09:50:00	74	40	0	0	0	1	0	0	0	1	0	0	0	2	NULL	NULL	NULL	NULL	NULL	NULL	NULL	NULL	NULL	NULL	NULL	NULL	NULL	NULL	NULL	NULL	NULL	NULL	NULL	NULL	NULL
Nursing	Female	50	31.09	Lower GI	2020-11-16 10:20:00	2020-11-16 10:41:00	21	2020-11-16 10:25:00	16	2020-11-16 10:55:00	2020-11-16 11:00:00	5	2020-11-16 11:10:00	2020-11-16 12:30:00	40	80	0	0	0	1	0	0	0	0	0	0	1	2	NULL	NULL	NULL	NULL	NULL	NULL	NULL	NULL	NULL	NULL	NULL	NULL	NULL	NULL	NULL	NULL	NULL	NULL	NULL	NULL	NULL
Nursing	Male	68	43.58	Lower GI	2020-01-24 09:46:05	2020-01-24 10:24:00	38	2020-01-24 10:15:00	9	2020-01-24 10:40:00	2020-01-24 10:45:00	5	2020-01-24 10:55:00	2020-01-24 11:31:00	59	36	1	0	0	0	0	1	0	0	0	0	0	2	NULL	NULL	NULL	NULL	NULL	NULL	NULL	NULL	NULL	NULL	NULL	NULL	NULL	NULL	NULL	NULL	NULL	NULL	NULL	NULL	NULL
Anesthesia	Female	76	23.8	Lower GI	2021-08-19 14:33:43	2021-08-19 14:37:00	4	2021-08-19 14:31:00	6	2021-08-19 15:00:00	2021-08-19 15:09:11	9	2021-08-19 15:24:00	2021-08-19 15:55:00	36	31	0	0	0	1	0	1	0	0	0	0	0	2	NULL	NULL	NULL	NULL	NULL	NULL	NULL	NULL	NULL	NULL	NULL	NULL	NULL	NULL	NULL	NULL	NULL	NULL	NULL	NULL	NULL
Anesthesia	Male	70	24.13	Lower GI	2021-08-31 14:03:01	2021-08-31 14:08:00	5	2021-08-31 14:03:00	5	2021-08-31 14:23:00	2021-08-31 14:25:04	2	2021-08-31 14:30:00	2021-08-31 15:00:00	22	30	0	0	0	0	0	1	0	0	0	0	0	1	NULL	NULL	NULL	NULL	NULL	NULL	NULL	NULL	NULL	NULL	NULL	NULL	NULL	NULL	NULL	NULL	NULL	NULL	NULL	NULL	NULL
Nursing	Female	24	33.25	Lower GI	2021-02-24 13:11:14	2021-02-24 13:29:00	18	2021-02-24 13:17:00	12	2021-02-24 13:43:00	2021-02-24 13:46:36	3	2021-02-24 13:52:00	2021-02-24 14:22:00	35	30	NULL	NULL	NULL	NULL	NULL	NULL	NULL	NULL	NULL	NULL	NULL	0	NULL	NULL	NULL	NULL	NULL	NULL	NULL	NULL	NULL	NULL	NULL	NULL	NULL	NULL	NULL	NULL	NULL	NULL	NULL	NULL	NULL
Nursing	Male	67	26.3	Lower GI	2020-02-03 08:09:39	2020-02-03 08:31:00	22	2020-02-03 08:24:25	7	2020-02-03 09:05:00	2020-02-03 09:07:16	2	2020-02-03 09:12:00	2020-02-03 09:32:00	58	20	NULL	NULL	NULL	NULL	NULL	NULL	NULL	NULL	NULL	NULL	NULL	0	NULL	NULL	NULL	NULL	NULL	NULL	NULL	NULL	NULL	NULL	NULL	NULL	NULL	NULL	NULL	NULL	NULL	NULL	NULL	NULL	NULL
Nursing	Female	57	18.56	Lower GI	2020-09-14 08:00:25	2020-09-14 08:15:00	15	2020-09-14 08:07:12	8	2020-09-14 08:33:00	2020-09-14 08:36:38	3	2020-09-14 08:43:00	2020-09-14 09:33:00	36	50	NULL	NULL	NULL	NULL	NULL	NULL	NULL	NULL	NULL	NULL	NULL	0	NULL	NULL	NULL	NULL	NULL	NULL	NULL	NULL	NULL	NULL	NULL	NULL	NULL	NULL	NULL	NULL	NULL	NULL	NULL	NULL	NULL
Anesthesia	Female	61	24.69	Lower GI	2021-10-26 12:10:04	2021-10-26 12:14:00	4	2021-10-26 12:08:00	6	2021-10-26 12:36:00	2021-10-26 12:37:48	1	2021-10-26 12:40:00	2021-10-26 13:28:00	27	48	NULL	NULL	NULL	NULL	NULL	NULL	NULL	NULL	NULL	NULL	NULL	0	NULL	NULL	NULL	NULL	NULL	NULL	NULL	NULL	NULL	NULL	NULL	NULL	NULL	NULL	NULL	NULL	NULL	NULL	NULL	NULL	NULL
Anesthesia	Male	75	29.53	Upper GI	2021-10-07 08:47:20	2021-10-07 08:53:00	6	2021-10-07 08:45:00	8	2021-10-07 09:04:00	2021-10-07 09:06:55	2	2021-10-07 09:15:00	2021-10-07 10:06:00	19	51	0	0	0	1	0	1	0	0	0	0	0	2	NULL	NULL	NULL	NULL	NULL	NULL	NULL	NULL	NULL	NULL	NULL	NULL	NULL	NULL	NULL	NULL	NULL	NULL	NULL	NULL	NULL
Nursing	Male	75	29.95	Lower GI	2021-04-15 15:32:10	2021-04-15 15:56:00	24	2021-04-15 15:46:56	10	2021-04-15 16:13:00	2021-04-15 16:15:17	2	2021-04-15 16:24:00	2021-04-15 16:30:00	43	6	0	0	0	1	0	1	0	0	0	0	0	2	NULL	NULL	NULL	NULL	NULL	NULL	NULL	NULL	NULL	NULL	NULL	NULL	NULL	NULL	NULL	NULL	NULL	NULL	NULL	NULL	NULL
Nursing	Female	52	38.01	Lower GI	2021-05-10 13:54:00	2021-05-10 14:42:00	48	2021-05-10 14:32:00	10	2021-05-10 15:20:00	2021-05-10 15:23:27	3	2021-05-10 15:30:00	2021-05-10 16:05:00	89	35	0	0	0	1	0	1	0	0	0	0	0	2	NULL	NULL	NULL	NULL	NULL	NULL	NULL	NULL	NULL	NULL	NULL	NULL	NULL	NULL	NULL	NULL	NULL	NULL	NULL	NULL	NULL
Nursing	Male	67	27.98	Lower GI	2020-03-06 14:55:13	2020-03-06 15:24:00	29	2020-03-06 15:13:17	11	2020-03-06 15:40:00	2020-03-06 15:44:54	4	2020-03-06 15:48:00	2020-03-06 17:00:00	49	72	0	0	0	0	0	1	0	0	0	0	0	1	NULL	NULL	NULL	NULL	NULL	NULL	NULL	NULL	NULL	NULL	NULL	NULL	NULL	NULL	NULL	NULL	NULL	NULL	NULL	NULL	NULL
Nursing	Male	57	25.56	Upper GI	2021-03-08 08:57:06	2021-03-08 09:30:00	33	2021-03-08 09:19:44	11	2021-03-08 09:34:00	2021-03-08 09:37:38	3	2021-03-08 09:43:00	2021-03-08 09:56:00	40	13	0	0	0	1	0	1	0	0	0	0	0	2	NULL	NULL	NULL	NULL	NULL	NULL	NULL	NULL	NULL	NULL	NULL	NULL	NULL	NULL	NULL	NULL	NULL	NULL	NULL	NULL	NULL
Nursing	Female	74	21.63	Upper GI	2021-06-24 10:52:08	2021-06-24 11:23:00	31	2021-06-24 11:17:00	6	2021-06-24 11:33:00	2021-06-24 11:40:00	7	2021-06-24 11:51:00	2021-06-24 12:29:00	48	38	0	0	0	0	0	1	0	0	0	0	0	1	NULL	NULL	NULL	NULL	NULL	NULL	NULL	NULL	NULL	NULL	NULL	NULL	NULL	NULL	NULL	NULL	NULL	NULL	NULL	NULL	NULL
Nursing	Male	50	27.46	Lower GI	2020-02-19 07:50:03	2020-02-19 08:52:00	62	2020-02-19 08:46:08	6	2020-02-19 09:02:00	2020-02-19 09:08:22	6	2020-02-19 09:15:00	2020-02-19 09:45:00	78	30	NULL	NULL	NULL	NULL	NULL	NULL	NULL	NULL	NULL	NULL	NULL	0	NULL	NULL	NULL	NULL	NULL	NULL	NULL	NULL	NULL	NULL	NULL	NULL	NULL	NULL	NULL	NULL	NULL	NULL	NULL	NULL	NULL
Anesthesia	Female	67	32.77	Lower GI	2021-09-23 09:28:08	2021-09-23 09:34:00	6	2021-09-23 09:26:00	8	2021-09-23 10:00:00	2021-09-23 10:04:04	4	2021-09-23 10:08:00	2021-09-23 10:58:00	36	50	0	0	0	1	0	0	0	0	0	0	0	1	NULL	NULL	NULL	NULL	NULL	NULL	NULL	NULL	NULL	NULL	NULL	NULL	NULL	NULL	NULL	NULL	NULL	NULL	NULL	NULL	NULL
Nursing	Male	53	27.41	Lower GI	2021-05-19 14:43:20	2021-05-19 15:16:00	33	2021-05-19 15:10:53	6	2021-05-19 15:30:00	2021-05-19 15:35:40	5	2021-05-19 15:40:00	2021-05-19 15:57:00	52	17	0	0	1	1	0	1	0	0	0	0	0	3	NULL	NULL	NULL	NULL	NULL	NULL	NULL	NULL	NULL	NULL	NULL	NULL	NULL	NULL	NULL	NULL	NULL	NULL	NULL	NULL	NULL
Nursing	Female	55	23.3	Lower GI	2021-06-14 15:48:55	2021-06-14 16:20:00	32	2021-06-14 16:11:57	9	2021-06-14 16:40:00	2021-06-14 16:43:06	3	2021-06-14 16:47:00	2021-06-14 17:18:00	55	31	NULL	NULL	NULL	NULL	NULL	NULL	NULL	NULL	NULL	NULL	NULL	0	NULL	NULL	NULL	NULL	NULL	NULL	NULL	NULL	NULL	NULL	NULL	NULL	NULL	NULL	NULL	NULL	NULL	NULL	NULL	NULL	NULL
Nursing	Male	75	22	Lower GI	2021-05-25 08:43:40	2021-05-25 08:59:00	16	2021-05-25 08:52:00	7	2021-05-25 09:13:00	2021-05-25 09:19:17	6	2021-05-25 09:22:00	2021-05-25 09:37:00	36	15	1	1	0	1	0	0	0	0	0	0	0	3	NULL	NULL	NULL	NULL	NULL	NULL	NULL	NULL	NULL	NULL	NULL	NULL	NULL	NULL	NULL	NULL	NULL	NULL	NULL	NULL	NULL
Nursing	Female	58	25.08	Lower GI	2020-11-13 11:39:09	2020-11-13 11:50:00	11	2020-11-13 11:46:24	4	2020-11-13 12:09:00	2020-11-13 12:12:32	3	2020-11-13 12:15:00	2020-11-13 12:52:00	33	37	0	0	0	1	0	0	0	0	0	0	0	1	NULL	NULL	NULL	NULL	NULL	NULL	NULL	NULL	NULL	NULL	NULL	NULL	NULL	NULL	NULL	NULL	NULL	NULL	NULL	NULL	NULL
Nursing	Male	67	25.09	Lower GI	2021-06-04 10:15:50	2021-06-04 10:51:00	36	2021-06-04 10:41:58	10	2021-06-04 11:16:00	2021-06-04 11:17:36	1	2021-06-04 11:21:00	2021-06-04 11:46:00	62	25	0	0	0	0	0	1	0	0	0	0	0	1	NULL	NULL	NULL	NULL	NULL	NULL	NULL	NULL	NULL	NULL	NULL	NULL	NULL	NULL	NULL	NULL	NULL	NULL	NULL	NULL	NULL
Nursing	Male	59	23.57	DUAL	2020-10-19 09:30:46	2020-10-19 09:53:00	23	2020-10-19 09:44:57	9	2020-10-19 10:27:00	2020-10-19 10:31:48	4	2020-10-19 10:39:00	2020-10-19 12:14:00	61	95	0	0	0	0	0	1	0	0	0	0	0	1	4	mg	NULL	NULL	NULL	NULL	NULL	NULL	NULL	NULL	NULL	NULL	NULL	NULL	NULL	NULL	NULL	NULL	NULL	NULL	NULL
Anesthesia	Female	77	27.44	Lower GI	2021-08-02 15:57:23	2021-08-02 16:10:00	13	2021-08-02 16:04:00	6	2021-08-02 16:29:00	2021-08-02 16:32:24	3	2021-08-02 16:39:00	2021-08-02 17:16:00	35	37	0	0	0	0	0	1	0	0	0	0	0	1	NULL	NULL	NULL	NULL	NULL	NULL	NULL	NULL	NULL	NULL	NULL	NULL	NULL	NULL	NULL	NULL	NULL	NULL	NULL	NULL	NULL
Anesthesia	Female	62	28.12	DUAL	2021-09-01 14:35:16	2021-09-01 14:39:00	4	2021-09-01 14:31:00	8	2021-09-01 15:18:00	2021-09-01 15:21:36	3	2021-09-01 15:19:00	2021-09-01 16:48:00	46	89	0	0	0	1	0	1	0	0	0	0	0	2	NULL	NULL	NULL	NULL	NULL	NULL	NULL	NULL	NULL	NULL	NULL	NULL	NULL	NULL	NULL	NULL	NULL	NULL	NULL	NULL	NULL
Anesthesia	Male	77	22.92	Lower GI	2021-09-09 10:31:30	2021-09-09 10:40:00	9	2021-09-09 10:34:00	6	2021-09-09 11:02:00	2021-09-09 11:05:24	3	2021-09-09 11:09:00	2021-09-09 12:18:00	34	69	0	1	0	0	0	1	0	0	0	0	0	2	NULL	NULL	NULL	NULL	NULL	NULL	NULL	NULL	NULL	NULL	NULL	NULL	NULL	NULL	NULL	NULL	NULL	NULL	NULL	NULL	NULL
Nursing	Female	73	36.32	Upper GI	2020-02-10 14:32:17	2020-02-10 15:00:00	28	2020-02-10 14:49:49	11	2020-02-10 15:08:00	2020-02-10 15:10:33	2	2020-02-10 15:22:00	2020-02-10 16:22:00	38	60	0	1	0	1	0	1	0	0	0	0	0	3	NULL	NULL	NULL	NULL	NULL	NULL	NULL	NULL	NULL	NULL	NULL	NULL	NULL	NULL	NULL	NULL	NULL	NULL	NULL	NULL	NULL
Nursing	Male	22	24.41	Lower GI	2020-06-04 09:54:49	2020-06-04 10:28:00	34	2020-06-04 10:18:00	10	2020-06-04 11:04:00	2020-06-04 11:06:34	2	2020-06-04 11:15:00	2020-06-04 11:55:00	72	40	NULL	NULL	NULL	NULL	NULL	NULL	NULL	NULL	NULL	NULL	NULL	0	NULL	NULL	NULL	NULL	NULL	NULL	NULL	NULL	NULL	NULL	NULL	NULL	NULL	NULL	NULL	NULL	NULL	NULL	NULL	NULL	NULL
Nursing	Male	53	26.32	Lower GI	2020-10-26 10:01:51	2020-10-26 10:44:00	43	2020-10-26 10:37:42	7	2020-10-26 10:57:00	2020-10-26 11:01:15	4	2020-10-26 11:07:00	2020-10-26 12:45:00	60	98	0	0	0	1	0	1	0	0	0	0	0	2	NULL	NULL	NULL	NULL	NULL	NULL	NULL	NULL	NULL	NULL	NULL	NULL	NULL	NULL	NULL	NULL	NULL	NULL	NULL	NULL	NULL
Nursing	Male	56	27.2	Lower GI	2021-02-24 10:09:28	2021-02-24 10:39:00	30	2021-02-24 10:31:04	8	2021-02-24 11:14:00	2021-02-24 11:16:49	2	2021-02-24 11:20:00	2021-02-24 12:02:00	67	42	NULL	NULL	NULL	NULL	NULL	NULL	NULL	NULL	NULL	NULL	NULL	0	NULL	NULL	NULL	NULL	NULL	NULL	NULL	NULL	NULL	NULL	NULL	NULL	NULL	NULL	NULL	NULL	NULL	NULL	NULL	NULL	NULL
Nursing	Male	80	26.26	Upper GI	2020-11-03 11:04:07	2020-11-03 11:48:00	44	2020-11-03 11:41:19	7	2020-11-03 12:01:00	2020-11-03 12:15:12	14	2020-11-03 12:13:00	2020-11-03 13:24:00	71	71	0	0	0	0	0	0	0	0	0	0	0	0	NULL	NULL	NULL	NULL	NULL	NULL	NULL	NULL	NULL	NULL	NULL	NULL	NULL	NULL	NULL	NULL	NULL	NULL	NULL	NULL	NULL
Nursing	Female	62	26.75	Upper GI	2020-10-22 16:24:00	2020-10-22 16:53:00	29	2020-10-22 16:46:00	7	2020-10-22 16:57:00	2020-10-22 17:02:26	5	2020-10-22 17:05:00	2020-10-22 17:21:00	38	16	0	0	0	1	0	0	0	0	0	0	0	1	NULL	NULL	NULL	NULL	NULL	NULL	NULL	NULL	NULL	NULL	NULL	NULL	NULL	NULL	NULL	NULL	NULL	NULL	NULL	NULL	NULL
Nursing	Female	61	25.15	Lower GI	2021-05-12 11:08:35	2021-05-12 11:23:00	15	2021-05-12 11:15:00	8	2021-05-12 11:45:00	2021-05-12 11:55:00	10	2021-05-12 11:57:00	2021-05-12 13:03:00	47	66	0	1	0	0	0	1	0	1	0	0	0	3	NULL	NULL	NULL	NULL	NULL	NULL	NULL	NULL	NULL	NULL	NULL	NULL	NULL	NULL	NULL	NULL	NULL	NULL	NULL	NULL	NULL
Nursing	Male	50	28.06	Lower GI	2020-06-08 13:30:25	2020-06-08 13:54:00	24	2020-06-08 13:48:45	6	2020-06-08 14:11:00	2020-06-08 14:16:50	5	2020-06-08 14:20:00	2020-06-08 15:05:00	46	45	NULL	NULL	NULL	NULL	NULL	NULL	NULL	NULL	NULL	NULL	NULL	0	NULL	NULL	NULL	NULL	NULL	NULL	NULL	NULL	NULL	NULL	NULL	NULL	NULL	NULL	NULL	NULL	NULL	NULL	NULL	NULL	NULL
Nursing	Male	66	23.73	Lower GI	2020-01-17 11:11:03	2020-01-17 11:38:00	27	2020-01-17 11:30:01	8	2020-01-17 11:57:00	2020-01-17 12:01:02	4	2020-01-17 12:07:00	2020-01-17 13:00:00	50	53	NULL	NULL	NULL	NULL	NULL	NULL	NULL	NULL	NULL	NULL	NULL	0	NULL	NULL	NULL	NULL	NULL	NULL	NULL	NULL	NULL	NULL	NULL	NULL	NULL	NULL	NULL	NULL	NULL	NULL	NULL	NULL	NULL
Nursing	Female	69	29.82	Lower GI	2021-06-17 13:40:22	2021-06-17 14:01:00	21	2021-06-17 13:53:46	8	2021-06-17 14:21:00	2021-06-17 14:23:43	2	2021-06-17 14:30:00	2021-06-17 15:40:00	43	70	NULL	NULL	NULL	NULL	NULL	NULL	NULL	NULL	NULL	NULL	NULL	0	NULL	NULL	NULL	NULL	NULL	NULL	NULL	NULL	NULL	NULL	NULL	NULL	NULL	NULL	NULL	NULL	NULL	NULL	NULL	NULL	NULL
Nursing	Male	83	22.89	Lower GI	2020-07-05 13:15:05	2020-07-05 13:34:00	19	2020-07-05 13:24:31	10	2020-07-05 14:06:00	2020-07-05 14:08:00	2	2020-07-05 14:08:00	2020-07-05 14:16:00	53	8	0	0	1	0	0	0	0	0	0	0	0	1	NULL	NULL	NULL	NULL	NULL	NULL	NULL	NULL	NULL	NULL	NULL	NULL	NULL	NULL	NULL	NULL	NULL	NULL	NULL	NULL	NULL
Nursing	Female	66	28.15	DUAL	2020-08-31 13:42:17	2020-08-31 14:00:00	18	2020-08-31 13:52:35	8	2020-08-31 14:37:00	2020-08-31 14:39:57	2	2020-08-31 14:45:00	2020-08-31 15:27:00	57	42	0	0	0	0	0	0	0	1	0	0	0	1	NULL	NULL	NULL	NULL	NULL	NULL	NULL	NULL	NULL	NULL	NULL	NULL	NULL	NULL	NULL	NULL	NULL	NULL	NULL	NULL	NULL
Nursing	Male	69	24.43	Lower GI	2021-03-10 09:43:25	2021-03-10 09:55:00	12	2021-03-10 09:48:00	7	2021-03-10 10:23:00	2021-03-10 10:27:08	4	2021-03-10 10:30:00	2021-03-10 11:15:00	44	45	NULL	NULL	NULL	NULL	NULL	NULL	NULL	NULL	NULL	NULL	NULL	0	NULL	NULL	NULL	NULL	NULL	NULL	NULL	NULL	NULL	NULL	NULL	NULL	NULL	NULL	NULL	NULL	NULL	NULL	NULL	NULL	NULL
Nursing	Female	58	18.6	Lower GI	2020-11-19 10:40:28	2020-11-19 11:22:00	42	2020-11-19 11:05:00	17	2020-11-19 11:50:00	2020-11-19 11:54:55	4	2020-11-19 12:00:00	2020-11-19 12:20:00	74	20	NULL	NULL	NULL	NULL	NULL	NULL	NULL	NULL	NULL	NULL	NULL	0	NULL	NULL	NULL	NULL	NULL	NULL	NULL	NULL	NULL	NULL	NULL	NULL	NULL	NULL	NULL	NULL	NULL	NULL	NULL	NULL	NULL
Nursing	Female	70	22.01	Lower GI	2021-02-01 14:45:00	2021-02-01 15:03:00	18	2021-02-01 14:55:00	8	2021-02-01 15:26:00	2021-02-01 15:30:40	4	2021-02-01 15:45:00	2021-02-01 17:00:00	45	75	0	0	0	1	0	0	0	0	0	0	0	1	NULL	NULL	NULL	NULL	NULL	NULL	NULL	NULL	NULL	NULL	NULL	NULL	NULL	NULL	NULL	NULL	NULL	NULL	NULL	NULL	NULL
Nursing	Male	76	28.82	Upper GI	2020-02-27 16:41:44	2020-02-27 16:56:00	15	2020-02-27 16:49:00	7	2020-02-27 17:04:00	2020-02-27 17:10:00	6	2020-02-27 17:15:00	2020-02-27 18:40:00	29	85	1	0	0	0	0	1	0	0	0	0	0	2	NULL	NULL	NULL	NULL	NULL	NULL	NULL	NULL	NULL	NULL	NULL	NULL	NULL	NULL	NULL	NULL	NULL	NULL	NULL	NULL	NULL
Nursing	Female	41	24.13	Lower GI	2020-12-08 14:38:53	2020-12-08 16:06:00	88	2020-12-08 15:49:00	17	2020-12-08 16:22:00	2020-12-08 16:25:26	3	2020-12-08 16:23:00	2020-12-08 17:11:00	107	48	0	0	0	0	0	0	1	0	0	1	0	2	NULL	NULL	NULL	NULL	NULL	NULL	NULL	NULL	NULL	NULL	NULL	NULL	NULL	NULL	NULL	NULL	NULL	NULL	NULL	NULL	NULL
Nursing	Female	41	20.8	Lower GI	2020-01-13 08:07:09	2020-01-13 08:37:00	30	2020-01-13 08:27:37	10	2020-01-13 08:46:00	2020-01-13 08:47:11	1	2020-01-13 08:50:00	2020-01-13 09:03:00	40	13	0	0	0	0	0	0	1	0	0	1	0	2	NULL	NULL	NULL	NULL	NULL	NULL	NULL	NULL	NULL	NULL	NULL	NULL	NULL	NULL	NULL	NULL	NULL	NULL	NULL	NULL	NULL
Nursing	Female	57	27.21	Lower GI	2021-04-20 14:19:35	2021-04-20 15:19:00	60	2021-04-20 15:10:35	9	2021-04-20 15:31:00	2021-04-20 15:34:02	3	2021-04-20 15:39:00	2021-04-20 16:27:00	75	48	NULL	NULL	NULL	NULL	NULL	NULL	NULL	NULL	NULL	NULL	NULL	0	NULL	NULL	NULL	NULL	NULL	NULL	NULL	NULL	NULL	NULL	NULL	NULL	NULL	NULL	NULL	NULL	NULL	NULL	NULL	NULL	NULL
Nursing	Female	50	18.85	Lower GI	2021-05-20 08:19:20	2021-05-20 08:36:00	17	2021-05-20 08:25:00	11	2021-05-20 08:54:00	2021-05-20 08:57:06	3	2021-05-20 09:01:00	2021-05-20 09:37:00	38	36	0	1	0	1	0	0	0	0	0	0	0	2	NULL	NULL	NULL	NULL	NULL	NULL	NULL	NULL	NULL	NULL	NULL	NULL	NULL	NULL	NULL	NULL	NULL	NULL	NULL	NULL	NULL
Nursing	Male	62	32.32	Lower GI	2021-01-07 11:12:14	2021-01-07 11:30:00	18	2021-01-07 11:15:00	15	2021-01-07 12:02:00	2021-01-07 12:05:00	3	2021-01-07 12:14:00	2021-01-07 12:58:00	53	44	0	0	0	0	0	1	0	0	0	0	0	1	NULL	NULL	NULL	NULL	NULL	NULL	NULL	NULL	NULL	NULL	NULL	NULL	NULL	NULL	NULL	NULL	NULL	NULL	NULL	NULL	NULL
Anesthesia	Male	77	26.82	DUAL	2021-10-08 14:04:25	2021-10-08 14:21:00	17	2021-10-08 14:08:00	13	2021-10-08 15:00:00	2021-10-08 15:04:05	4	2021-10-08 15:11:00	2021-10-08 16:00:00	60	49	1	0	0	1	0	1	0	0	0	0	0	3	NULL	NULL	NULL	NULL	NULL	NULL	NULL	NULL	NULL	NULL	NULL	NULL	NULL	NULL	NULL	NULL	NULL	NULL	NULL	NULL	NULL
Nursing	Male	67	28.48	Lower GI	2020-02-10 07:22:21	2020-02-10 08:08:00	46	2020-02-10 08:00:49	8	2020-02-10 08:33:00	2020-02-10 08:34:18	1	2020-02-10 08:47:00	2020-02-10 09:45:00	72	58	0	0	0	0	0	1	0	0	0	0	0	1	NULL	NULL	NULL	NULL	NULL	NULL	NULL	NULL	NULL	NULL	NULL	NULL	NULL	NULL	NULL	NULL	NULL	NULL	NULL	NULL	NULL
Anesthesia	Female	60	33.65	DUAL	2021-08-24 14:07:29	2021-08-24 14:36:00	29	2021-08-24 14:26:00	10	2021-08-24 15:13:00	2021-08-24 15:17:29	4	2021-08-24 15:25:00	2021-08-24 16:00:00	70	35	1	0	0	1	0	1	1	0	0	1	0	5	NULL	NULL	NULL	NULL	NULL	NULL	NULL	NULL	NULL	NULL	NULL	NULL	NULL	NULL	NULL	NULL	NULL	NULL	NULL	NULL	NULL
Anesthesia	Male	62	29.65	Upper GI	2021-08-03 13:47:49	2021-08-03 13:57:00	10	2021-08-03 13:52:00	5	2021-08-03 14:09:00	2021-08-03 14:10:00	1	2021-08-03 14:15:00	2021-08-03 14:55:00	23	40	0	0	0	1	0	0	0	0	0	0	0	1	NULL	NULL	NULL	NULL	NULL	NULL	NULL	NULL	NULL	NULL	NULL	NULL	NULL	NULL	NULL	NULL	NULL	NULL	NULL	NULL	NULL
Nursing	Male	62	28.13	Lower GI	2021-03-01 15:30:31	2021-03-01 15:57:00	27	2021-03-01 15:45:52	12	2021-03-01 16:26:00	2021-03-01 16:31:55	5	2021-03-01 16:35:00	2021-03-01 17:00:00	61	25	0	0	0	1	0	0	0	0	0	0	0	1	NULL	NULL	NULL	NULL	NULL	NULL	NULL	NULL	NULL	NULL	NULL	NULL	NULL	NULL	NULL	NULL	NULL	NULL	NULL	NULL	NULL
Nursing	Male	62	21.24	Lower GI	2021-02-18 10:42:50	2021-02-18 11:27:00	45	2021-02-18 11:15:02	12	2021-02-18 11:41:00	2021-02-18 11:44:20	3	2021-02-18 11:52:00	2021-02-18 12:12:00	62	20	1	0	0	0	0	0	0	0	0	0	0	1	NULL	NULL	NULL	NULL	NULL	NULL	NULL	NULL	NULL	NULL	NULL	NULL	NULL	NULL	NULL	NULL	NULL	NULL	NULL	NULL	NULL
Nursing	Female	72	21.29	Lower GI	2020-08-25 16:09:54	2020-08-25 16:22:00	13	2020-08-25 16:16:00	6	2020-08-25 16:32:00	2020-08-25 16:38:01	6	2020-08-25 16:42:00	2020-08-25 17:00:00	29	18	0	0	0	1	0	0	1	0	0	1	0	3	NULL	NULL	NULL	NULL	NULL	NULL	NULL	NULL	NULL	NULL	NULL	NULL	NULL	NULL	NULL	NULL	NULL	NULL	NULL	NULL	NULL
Nursing	Female	42	29.29	Lower GI	2020-10-16 10:26:19	2020-10-16 10:50:00	24	2020-10-16 10:40:00	10	2020-10-16 11:06:00	2020-10-16 11:11:49	5	2020-10-16 11:16:00	2020-10-16 12:29:00	45	73	NULL	NULL	NULL	NULL	NULL	NULL	NULL	NULL	NULL	NULL	NULL	0	4	mg	NULL	NULL	NULL	NULL	NULL	NULL	NULL	NULL	NULL	NULL	NULL	NULL	NULL	NULL	NULL	NULL	NULL	NULL	NULL
Nursing	Male	51	25.37	Lower GI	2020-08-07 11:27:19	2020-08-07 11:40:00	13	2020-08-07 11:30:34	10	2020-08-07 12:08:00	2020-08-07 12:14:38	6	2020-08-07 12:19:00	2020-08-07 12:36:00	47	17	NULL	NULL	NULL	NULL	NULL	NULL	NULL	NULL	NULL	NULL	NULL	0	NULL	NULL	NULL	NULL	NULL	NULL	NULL	NULL	NULL	NULL	NULL	NULL	NULL	NULL	NULL	NULL	NULL	NULL	NULL	NULL	NULL
Nursing	Female	47	19.22	Lower GI	2021-01-14 08:54:02	2021-01-14 09:46:00	52	2021-01-14 09:38:00	8	2021-01-14 10:12:00	2021-01-14 10:17:00	5	2021-01-14 10:22:00	2021-01-14 10:57:00	83	35	0	0	0	1	0	0	1	0	0	1	0	3	NULL	NULL	NULL	NULL	NULL	NULL	NULL	NULL	NULL	NULL	NULL	NULL	NULL	NULL	NULL	NULL	NULL	NULL	NULL	NULL	NULL
Nursing	Female	46	19.37	DUAL	2020-06-18 07:57:23	2020-06-18 08:12:00	15	2020-06-18 08:04:00	8	2020-06-18 08:47:00	2020-06-18 08:58:53	11	2020-06-18 08:55:00	2020-06-18 09:21:00	61	26	0	0	0	1	0	0	1	0	0	1	0	3	NULL	NULL	NULL	NULL	NULL	NULL	NULL	NULL	NULL	NULL	NULL	NULL	NULL	NULL	NULL	NULL	NULL	NULL	NULL	NULL	NULL
Nursing	Male	81	25.84	Lower GI	2020-11-17 10:39:07	2020-11-17 11:13:00	34	2020-11-17 11:07:21	6	2020-11-17 11:29:00	2020-11-17 11:36:50	7	2020-11-17 11:35:00	2020-11-17 12:30:00	57	55	0	0	1	0	0	1	0	0	0	0	0	2	NULL	NULL	NULL	NULL	NULL	NULL	NULL	NULL	NULL	NULL	NULL	NULL	NULL	NULL	NULL	NULL	NULL	NULL	NULL	NULL	NULL
Anesthesia	Female	63	26.78	Lower GI	2021-08-04 12:59:44	2021-08-04 13:02:00	3	2021-08-04 12:57:00	5	2021-08-04 13:21:00	2021-08-04 13:23:17	2	2021-08-04 13:30:00	2021-08-04 14:00:00	24	30	0	0	0	1	0	0	0	0	0	0	0	1	NULL	NULL	NULL	NULL	NULL	NULL	NULL	NULL	NULL	NULL	NULL	NULL	NULL	NULL	NULL	NULL	NULL	NULL	NULL	NULL	NULL
Anesthesia	Male	61	25.84	Lower GI	2021-09-22 15:24:07	2021-09-22 15:39:00	15	2021-09-22 15:31:00	8	2021-09-22 15:55:00	2021-09-22 15:57:32	2	2021-09-22 16:05:00	2021-09-22 16:35:00	33	30	0	0	0	0	0	0	0	0	0	0	0	0	NULL	NULL	NULL	NULL	NULL	NULL	NULL	NULL	NULL	NULL	NULL	NULL	NULL	NULL	NULL	NULL	NULL	NULL	NULL	NULL	NULL
Nursing	Female	62	29.86	Lower GI	2020-09-16 07:15:38	2020-09-16 07:52:00	37	2020-09-16 07:40:19	12	2020-09-16 08:19:00	2020-09-16 08:23:37	4	2020-09-16 08:27:00	2020-09-16 08:58:00	68	31	0	0	0	0	0	1	0	0	0	0	0	1	NULL	NULL	NULL	NULL	NULL	NULL	NULL	NULL	NULL	NULL	NULL	NULL	NULL	NULL	NULL	NULL	NULL	NULL	NULL	NULL	NULL
Nursing	Female	56	21.73	Lower GI	2021-04-06 08:14:10	2021-04-06 08:27:00	13	2021-04-06 08:23:04	4	2021-04-06 08:58:00	2021-04-06 09:00:46	2	2021-04-06 09:04:00	2021-04-06 10:04:00	46	60	0	0	0	0	0	1	0	0	0	0	0	1	NULL	NULL	NULL	NULL	NULL	NULL	NULL	NULL	NULL	NULL	NULL	NULL	NULL	NULL	NULL	NULL	NULL	NULL	NULL	NULL	NULL
Nursing	Female	67	20.12	Lower GI	2020-07-29 08:52:22	2020-07-29 09:06:00	14	2020-07-29 09:02:09	4	2020-07-29 09:36:00	2020-07-29 09:38:32	2	2020-07-29 09:43:00	2020-07-29 11:39:00	46	116	0	0	0	1	0	0	0	0	0	0	0	1	4	mg	NULL	NULL	NULL	NULL	NULL	NULL	NULL	NULL	NULL	NULL	NULL	NULL	NULL	NULL	NULL	NULL	NULL	NULL	NULL
Nursing	Female	55	40.39	Upper GI	2021-03-10 16:18:46	2021-03-10 16:31:00	13	2021-03-10 16:27:31	4	2021-03-10 16:43:00	2021-03-10 16:47:44	4	2021-03-10 16:55:00	2021-03-10 17:55:00	29	60	NULL	NULL	NULL	NULL	NULL	NULL	NULL	NULL	NULL	NULL	NULL	0	NULL	NULL	NULL	NULL	NULL	NULL	NULL	NULL	NULL	NULL	NULL	NULL	NULL	NULL	NULL	NULL	NULL	NULL	NULL	NULL	NULL
Nursing	Male	74	27.99	Lower GI	2020-02-05 14:26:16	2020-02-05 14:33:00	7	2020-02-05 14:23:56	10	2020-02-05 14:47:00	2020-02-05 14:51:56	4	2020-02-05 15:00:00	2020-02-05 15:30:00	25	30	0	0	0	0	0	1	0	0	0	0	0	1	NULL	NULL	NULL	NULL	NULL	NULL	NULL	NULL	NULL	NULL	NULL	NULL	NULL	NULL	NULL	NULL	NULL	NULL	NULL	NULL	NULL
Nursing	Male	61	34.44	Lower GI	2020-01-29 14:05:00	2020-01-29 14:21:00	16	2020-01-29 14:13:30	8	2020-01-29 14:41:00	2020-01-29 14:44:21	3	2020-01-29 14:45:00	2020-01-29 15:16:00	39	31	1	0	0	0	0	0	0	0	0	0	0	1	NULL	NULL	NULL	NULL	NULL	NULL	NULL	NULL	NULL	NULL	NULL	NULL	NULL	NULL	NULL	NULL	NULL	NULL	NULL	NULL	NULL
Nursing	Female	41	32.56	Upper GI	2020-01-07 07:38:00	2020-01-07 08:36:00	58	2020-01-07 08:31:00	5	2020-01-07 08:46:00	2020-01-07 08:50:10	4	2020-01-07 08:55:00	2020-01-07 09:41:00	72	46	1	0	0	0	0	0	0	0	0	0	0	1	NULL	NULL	NULL	NULL	NULL	NULL	NULL	NULL	NULL	NULL	NULL	NULL	NULL	NULL	NULL	NULL	NULL	NULL	NULL	NULL	NULL
Nursing	Female	68	20.03	Lower GI	2020-10-28 11:45:57	2020-10-28 12:10:00	25	2020-10-28 12:00:11	10	2020-10-28 12:32:00	2020-10-28 12:35:36	3	2020-10-28 12:17:00	2020-10-28 13:16:00	50	59	0	1	1	0	0	1	1	1	0	1	0	6	NULL	NULL	NULL	NULL	NULL	NULL	NULL	NULL	NULL	NULL	NULL	NULL	NULL	NULL	NULL	NULL	NULL	NULL	NULL	NULL	NULL
Nursing	Female	51	50.94	DUAL	2020-01-21 14:17:34	2020-01-21 15:12:00	55	2020-01-21 15:02:42	10	2020-01-21 15:36:00	2020-01-21 15:40:10	4	2020-01-21 15:46:00	2020-01-21 16:01:00	83	15	1	0	0	0	0	1	0	0	0	0	0	2	NULL	NULL	NULL	NULL	NULL	NULL	NULL	NULL	NULL	NULL	NULL	NULL	NULL	NULL	NULL	NULL	NULL	NULL	NULL	NULL	NULL
Nursing	Female	52	26.63	Lower GI	2020-02-27 10:24:14	2020-02-27 11:14:00	50	2020-02-27 11:04:18	10	2020-02-27 11:26:00	2020-02-27 11:28:47	2	2020-02-27 11:31:00	2020-02-27 11:51:00	64	20	0	1	0	0	0	0	0	0	0	0	0	1	NULL	NULL	NULL	NULL	NULL	NULL	NULL	NULL	NULL	NULL	NULL	NULL	NULL	NULL	NULL	NULL	NULL	NULL	NULL	NULL	NULL
Nursing	Female	22	21.95	Lower GI	2020-07-22 16:11:20	2020-07-22 16:27:00	16	2020-07-22 16:18:56	9	2020-07-22 16:43:00	2020-07-22 16:45:27	2	2020-07-22 16:48:00	2020-07-22 17:33:00	34	45	NULL	NULL	NULL	NULL	NULL	NULL	NULL	NULL	NULL	NULL	NULL	0	NULL	NULL	NULL	NULL	NULL	NULL	NULL	NULL	NULL	NULL	NULL	NULL	NULL	NULL	NULL	NULL	NULL	NULL	NULL	NULL	NULL
Nursing	Female	69	28.51	Lower GI	2020-02-10 07:59:39	2020-02-10 08:08:00	9	2020-02-10 08:02:44	6	2020-02-10 08:27:00	2020-02-10 08:29:50	2	2020-02-10 08:37:00	2020-02-10 09:15:00	30	38	1	0	0	0	0	0	0	0	0	0	0	1	NULL	NULL	NULL	NULL	NULL	NULL	NULL	NULL	NULL	NULL	NULL	NULL	NULL	NULL	NULL	NULL	NULL	NULL	NULL	NULL	NULL
Nursing	Female	61	37.03	Lower GI	2020-10-08 06:59:07	2020-10-08 07:10:00	11	2020-10-08 07:04:00	6	2020-10-08 07:34:00	2020-10-08 07:40:00	6	2020-10-08 07:44:00	2020-10-08 08:25:00	41	41	0	0	0	1	0	1	0	0	0	0	0	2	NULL	NULL	NULL	NULL	NULL	NULL	NULL	NULL	NULL	NULL	NULL	NULL	NULL	NULL	NULL	NULL	NULL	NULL	NULL	NULL	NULL
Nursing	Male	46	25.2	Lower GI	2021-06-16 10:46:01	2021-06-16 10:58:00	12	2021-06-16 10:49:00	9	2021-06-16 11:08:00	2021-06-16 11:19:15	11	2021-06-16 11:16:00	2021-06-16 12:10:00	33	54	0	0	0	1	0	0	0	0	0	0	0	1	NULL	NULL	NULL	NULL	NULL	NULL	NULL	NULL	NULL	NULL	NULL	NULL	NULL	NULL	NULL	NULL	NULL	NULL	NULL	NULL	NULL
Nursing	Male	73	27.02	Lower GI	2021-02-26 10:03:51	2021-02-26 10:36:00	33	2021-02-26 10:28:22	8	2021-02-26 11:00:00	2021-02-26 11:01:06	1	2021-02-26 11:07:00	2021-02-26 12:05:00	58	58	0	0	0	1	0	1	0	0	0	0	0	2	NULL	NULL	NULL	NULL	NULL	NULL	NULL	NULL	NULL	NULL	NULL	NULL	NULL	NULL	NULL	NULL	NULL	NULL	NULL	NULL	NULL
Anesthesia	Male	77	24.46	Lower GI	2021-09-27 11:07:03	2021-09-27 11:12:00	5	2021-09-27 11:07:00	5	2021-09-27 11:31:00	2021-09-27 11:35:11	4	2021-09-27 11:41:00	2021-09-27 12:05:00	28	24	0	0	0	0	0	1	0	0	0	0	0	1	NULL	NULL	NULL	NULL	NULL	NULL	NULL	NULL	NULL	NULL	NULL	NULL	NULL	NULL	NULL	NULL	NULL	NULL	NULL	NULL	NULL
Nursing	Female	69	26.16	Upper GI	2020-11-17 06:10:15	2020-11-17 07:24:00	74	2020-11-17 07:14:47	10	2020-11-17 07:31:00	2020-11-17 07:34:44	3	2020-11-17 07:43:00	2020-11-17 08:40:00	84	57	0	0	0	1	0	1	0	0	0	0	0	2	NULL	NULL	NULL	NULL	NULL	NULL	NULL	NULL	NULL	NULL	NULL	NULL	NULL	NULL	NULL	NULL	NULL	NULL	NULL	NULL	NULL
Nursing	Male	85	25.09	DUAL	2020-07-13 12:52:35	2020-07-13 13:14:00	22	2020-07-13 13:08:22	6	2020-07-13 13:37:00	2020-07-13 13:42:19	5	2020-07-13 13:47:00	2020-07-13 14:55:00	50	68	0	1	0	0	0	0	0	0	0	0	0	1	NULL	NULL	NULL	NULL	NULL	NULL	NULL	NULL	NULL	NULL	NULL	NULL	NULL	NULL	NULL	NULL	NULL	NULL	NULL	NULL	NULL
Nursing	Female	37	22.6	Lower GI	2020-01-27 06:56:53	2020-01-27 07:13:00	17	2020-01-27 07:06:28	7	2020-01-27 07:30:00	2020-03-19 10:26:48	75056	2020-01-27 07:40:00	2020-01-27 07:59:00	75090	19	NULL	NULL	NULL	NULL	NULL	NULL	NULL	NULL	NULL	NULL	NULL	0	NULL	NULL	NULL	NULL	NULL	NULL	NULL	NULL	NULL	NULL	NULL	NULL	NULL	NULL	NULL	NULL	NULL	NULL	NULL	NULL	NULL
Nursing	Male	51	30.57	Lower GI	2021-06-23 10:46:55	2021-06-23 11:24:00	38	2021-06-23 11:14:08	10	2021-06-23 11:46:00	2021-06-23 11:50:50	4	2021-06-23 11:54:00	2021-06-23 12:09:00	64	15	NULL	NULL	NULL	NULL	NULL	NULL	NULL	NULL	NULL	NULL	NULL	0	NULL	NULL	NULL	NULL	NULL	NULL	NULL	NULL	NULL	NULL	NULL	NULL	NULL	NULL	NULL	NULL	NULL	NULL	NULL	NULL	NULL
Nursing	Female	72	31.31	Upper GI	2020-12-01 07:01:28	2020-12-01 07:29:00	28	2020-12-01 07:18:52	11	2020-12-01 07:41:00	2020-12-01 07:48:48	7	2020-12-01 07:52:00	2020-12-01 08:37:00	47	45	0	0	0	1	0	1	0	0	0	0	0	2	NULL	NULL	NULL	NULL	NULL	NULL	NULL	NULL	NULL	NULL	NULL	NULL	NULL	NULL	NULL	NULL	NULL	NULL	NULL	NULL	NULL
Nursing	Female	53	22.67	Lower GI	2021-05-18 08:17:57	2021-05-18 08:38:00	21	2021-05-18 08:31:32	7	2021-05-18 08:53:00	2021-05-18 08:56:44	3	2021-05-18 09:01:00	2021-05-18 09:37:00	39	36	NULL	NULL	NULL	NULL	NULL	NULL	NULL	NULL	NULL	NULL	NULL	0	NULL	NULL	NULL	NULL	NULL	NULL	NULL	NULL	NULL	NULL	NULL	NULL	NULL	NULL	NULL	NULL	NULL	NULL	NULL	NULL	NULL
Nursing	Male	65	25.85	Lower GI	2021-02-15 10:36:57	2021-02-15 11:02:00	26	2021-02-15 10:50:31	12	2021-02-15 11:46:00	2021-02-15 11:48:14	2	2021-02-15 11:58:00	2021-02-15 12:54:00	72	56	1	0	1	1	0	0	1	0	0	1	0	5	NULL	NULL	NULL	NULL	NULL	NULL	NULL	NULL	NULL	NULL	NULL	NULL	NULL	NULL	NULL	NULL	NULL	NULL	NULL	NULL	NULL
Nursing	Female	51	32.78	Lower GI	2021-03-23 10:49:00	2021-03-23 11:17:00	28	2021-03-23 11:11:00	6	2021-03-23 11:37:00	2021-03-23 11:42:11	5	2021-03-23 11:45:00	2021-03-23 12:35:00	53	50	0	0	0	1	0	0	0	0	0	0	0	1	NULL	NULL	NULL	NULL	NULL	NULL	NULL	NULL	NULL	NULL	NULL	NULL	NULL	NULL	NULL	NULL	NULL	NULL	NULL	NULL	NULL
Nursing	Male	57	23.96	Lower GI	2020-03-04 08:09:50	2020-03-04 08:30:00	21	2020-03-04 08:25:52	5	2020-03-04 08:44:00	2020-03-04 08:45:51	1	2020-03-04 08:52:00	2020-03-04 09:41:00	36	49	0	0	0	0	0	1	0	0	0	0	0	1	NULL	NULL	NULL	NULL	NULL	NULL	NULL	NULL	NULL	NULL	NULL	NULL	NULL	NULL	NULL	NULL	NULL	NULL	NULL	NULL	NULL
Nursing	Female	44	30.13	Upper GI	2021-02-10 15:22:56	2021-02-10 16:11:00	49	2021-02-10 16:01:00	10	2021-02-10 16:18:00	2021-02-10 16:20:59	2	2021-02-10 16:25:00	2021-02-10 17:01:00	58	36	NULL	NULL	NULL	NULL	NULL	NULL	NULL	NULL	NULL	NULL	NULL	0	NULL	NULL	NULL	NULL	NULL	NULL	NULL	NULL	NULL	NULL	NULL	NULL	NULL	NULL	NULL	NULL	NULL	NULL	NULL	NULL	NULL
Nursing	Female	55	18.9	Lower GI	2020-01-30 12:44:37	2020-01-30 13:28:00	44	2020-01-30 13:18:00	10	2020-01-30 13:55:00	2020-01-30 14:00:00	5	2020-01-30 14:11:00	2020-01-30 14:54:00	76	43	NULL	NULL	NULL	NULL	NULL	NULL	NULL	NULL	NULL	NULL	NULL	0	NULL	NULL	NULL	NULL	NULL	NULL	NULL	NULL	NULL	NULL	NULL	NULL	NULL	NULL	NULL	NULL	NULL	NULL	NULL	NULL	NULL
Nursing	Male	70	32.23	Lower GI	2020-02-04 10:13:52	2020-02-04 10:54:00	41	2020-02-04 10:44:00	10	2020-02-04 11:27:00	2020-02-04 11:32:51	5	2020-02-04 11:38:00	2020-02-04 12:37:00	79	59	0	1	0	1	0	1	1	0	0	1	0	5	NULL	NULL	NULL	NULL	NULL	NULL	NULL	NULL	NULL	NULL	NULL	NULL	NULL	NULL	NULL	NULL	NULL	NULL	NULL	NULL	NULL
Nursing	Female	69	29.12	Upper GI	2021-03-24 08:15:00	2021-03-24 08:47:00	32	2021-03-24 08:40:00	7	2021-03-24 08:50:00	2021-03-24 08:53:00	3	2021-03-24 08:58:00	2021-03-24 09:28:00	38	30	1	0	0	1	0	0	0	1	0	0	0	3	NULL	NULL	NULL	NULL	NULL	NULL	NULL	NULL	NULL	NULL	NULL	NULL	NULL	NULL	NULL	NULL	NULL	NULL	NULL	NULL	NULL
Nursing	Female	75	24.48	Lower GI	2021-05-13 07:24:06	2021-05-13 07:47:00	23	2021-05-13 07:32:23	15	2021-05-13 08:10:00	2021-05-13 08:16:43	6	2021-05-13 08:30:00	2021-05-13 08:59:00	52	29	0	0	0	0	0	1	0	0	0	0	0	1	NULL	NULL	NULL	NULL	NULL	NULL	NULL	NULL	NULL	NULL	NULL	NULL	NULL	NULL	NULL	NULL	NULL	NULL	NULL	NULL	NULL
Nursing	Male	21	32.55	Upper GI	2020-08-27 15:51:10	2020-08-27 16:06:00	15	2020-08-27 15:44:00	22	2020-08-27 16:12:00	2020-08-27 16:16:38	4	2020-08-27 16:20:00	2020-08-27 17:10:00	25	50	NULL	NULL	NULL	NULL	NULL	NULL	NULL	NULL	NULL	NULL	NULL	0	NULL	NULL	NULL	NULL	NULL	NULL	NULL	NULL	NULL	NULL	NULL	NULL	NULL	NULL	NULL	NULL	NULL	NULL	NULL	NULL	NULL
Nursing	Male	80	24.53	Lower GI	2020-11-19 13:26:56	2020-11-19 13:56:00	30	2020-11-19 13:45:18	11	2020-11-19 14:19:00	2020-11-19 14:21:10	2	2020-11-19 14:29:00	2020-11-19 16:02:00	55	93	0	0	1	0	0	1	1	0	0	1	0	4	NULL	NULL	NULL	NULL	NULL	NULL	NULL	NULL	NULL	NULL	NULL	NULL	NULL	NULL	NULL	NULL	NULL	NULL	NULL	NULL	NULL
Nursing	Female	34	25.06	DUAL	2021-01-14 08:14:15	2021-01-14 08:44:00	30	2021-01-14 08:34:30	10	2021-01-14 09:32:00	2021-01-14 09:36:30	4	2021-01-14 09:41:00	2021-01-14 10:45:00	82	64	0	1	0	1	0	0	0	1	0	0	0	3	NULL	NULL	NULL	NULL	NULL	NULL	NULL	NULL	NULL	NULL	NULL	NULL	NULL	NULL	NULL	NULL	NULL	NULL	NULL	NULL	NULL
Nursing	Female	22	28.34	DUAL	2021-03-22 09:10:53	2021-03-22 09:34:00	24	2021-03-22 09:22:40	12	2021-03-22 09:56:00	2021-03-22 10:01:20	5	2021-03-22 10:05:00	2021-03-22 10:40:00	51	35	0	0	0	1	0	0	0	0	0	0	0	1	NULL	NULL	NULL	NULL	NULL	NULL	NULL	NULL	NULL	NULL	NULL	NULL	NULL	NULL	NULL	NULL	NULL	NULL	NULL	NULL	NULL
Nursing	Female	72	33.47	Upper GI	2021-06-22 09:24:18	2021-06-22 09:34:00	10	2021-06-22 09:30:42	4	2021-06-22 09:40:00	2021-06-22 09:52:26	12	2021-06-22 09:48:00	2021-06-22 10:14:00	28	26	1	0	0	1	0	1	0	1	0	0	0	4	NULL	NULL	NULL	NULL	NULL	NULL	NULL	NULL	NULL	NULL	NULL	NULL	NULL	NULL	NULL	NULL	NULL	NULL	NULL	NULL	NULL
Nursing	Female	71	33.3	Upper GI	2020-06-18 09:53:39	2020-06-18 10:15:00	22	2020-06-18 10:06:16	9	2020-06-18 10:19:00	2020-06-18 10:22:40	3	2020-06-18 10:26:00	2020-06-18 10:41:00	29	15	1	0	0	1	0	1	0	1	0	0	0	4	NULL	NULL	NULL	NULL	NULL	NULL	NULL	NULL	NULL	NULL	NULL	NULL	NULL	NULL	NULL	NULL	NULL	NULL	NULL	NULL	NULL
Nursing	Female	64	24.24	Upper GI	2020-08-11 10:14:08	2020-08-11 10:49:00	35	2020-08-11 10:42:28	7	2020-08-11 10:53:00	2020-08-11 10:56:01	3	2020-08-11 10:59:00	2020-08-11 12:17:00	42	78	0	0	0	1	0	0	0	1	0	0	0	2	NULL	NULL	NULL	NULL	NULL	NULL	NULL	NULL	NULL	NULL	NULL	NULL	NULL	NULL	NULL	NULL	NULL	NULL	NULL	NULL	NULL
Nursing	Male	73	26.39	Lower GI	2020-06-05 11:00:22	2020-06-05 11:25:00	25	2020-06-05 11:14:48	11	2020-06-05 11:56:00	2020-06-05 11:57:18	1	2020-06-05 12:04:00	2020-06-05 13:00:00	57	56	0	0	0	0	0	1	0	0	0	0	0	1	NULL	NULL	NULL	NULL	NULL	NULL	NULL	NULL	NULL	NULL	NULL	NULL	NULL	NULL	NULL	NULL	NULL	NULL	NULL	NULL	NULL
Nursing	Male	50	34.33	Lower GI	2020-08-26 15:28:25	2020-08-26 16:04:00	36	2020-08-26 15:53:43	11	2020-08-26 16:24:00	2020-08-26 16:28:51	4	2020-08-26 16:30:00	2020-08-26 17:22:00	60	52	0	1	0	0	0	0	0	0	0	0	0	1	NULL	NULL	NULL	NULL	NULL	NULL	NULL	NULL	NULL	NULL	NULL	NULL	NULL	NULL	NULL	NULL	NULL	NULL	NULL	NULL	NULL
Nursing	Female	66	33.89	Lower GI	2020-03-10 16:59:51	2020-03-10 17:28:00	29	2020-03-10 17:23:55	5	2020-03-10 17:48:00	2020-03-10 17:53:39	5	2020-03-10 18:00:00	2020-03-10 18:18:00	54	18	1	0	0	0	0	1	0	1	0	0	0	3	NULL	NULL	NULL	NULL	NULL	NULL	NULL	NULL	NULL	NULL	NULL	NULL	NULL	NULL	NULL	NULL	NULL	NULL	NULL	NULL	NULL
Nursing	Female	48	31.01	Lower GI	2020-08-05 08:59:35	2020-08-05 09:49:00	50	2020-08-05 09:42:45	7	2020-08-05 09:59:00	2020-08-05 10:00:52	1	2020-08-05 10:05:00	2020-08-05 11:00:00	61	55	0	0	0	0	0	1	0	0	0	0	1	2	NULL	NULL	NULL	NULL	NULL	NULL	NULL	NULL	NULL	NULL	NULL	NULL	NULL	NULL	NULL	NULL	NULL	NULL	NULL	NULL	NULL
Nursing	Male	55	27.12	Lower GI	2021-05-20 12:49:17	2021-05-20 13:54:00	65	2021-05-20 13:45:58	9	2021-05-20 14:17:00	2021-05-20 14:20:06	3	2021-05-20 14:24:00	2021-05-20 16:15:00	91	111	0	0	0	0	0	0	0	0	0	0	0	0	NULL	NULL	NULL	NULL	NULL	NULL	NULL	NULL	NULL	NULL	NULL	NULL	NULL	NULL	NULL	NULL	NULL	NULL	NULL	NULL	NULL
Nursing	Male	50	24.5	Lower GI	2020-07-21 11:19:27	2020-07-21 12:00:00	41	2020-07-21 11:51:57	9	2020-07-21 12:30:00	2020-07-21 12:31:11	1	2020-07-21 12:38:00	2020-07-21 13:15:00	72	37	0	0	0	0	0	1	0	0	0	0	0	1	NULL	NULL	NULL	NULL	NULL	NULL	NULL	NULL	NULL	NULL	NULL	NULL	NULL	NULL	NULL	NULL	NULL	NULL	NULL	NULL	NULL
Nursing	Female	46	23.91	Lower GI	2020-09-08 15:09:43	2020-09-08 15:23:00	14	2020-09-08 15:15:41	8	2020-09-08 15:53:00	2020-09-08 15:54:14	1	2020-09-08 16:01:00	2020-09-08 16:35:00	45	34	0	0	0	0	0	0	1	0	0	1	0	2	NULL	NULL	NULL	NULL	NULL	NULL	NULL	NULL	NULL	NULL	NULL	NULL	NULL	NULL	NULL	NULL	NULL	NULL	NULL	NULL	NULL
Anesthesia	Female	44	24.13	Lower GI	2021-10-21 13:07:54	2021-10-21 13:13:00	6	2021-10-21 13:05:00	8	2021-10-21 13:33:00	2021-10-21 13:35:15	2	2021-10-21 13:37:00	2021-10-21 14:04:00	28	27	NULL	NULL	NULL	NULL	NULL	NULL	NULL	NULL	NULL	NULL	NULL	0	NULL	NULL	NULL	NULL	NULL	NULL	NULL	NULL	NULL	NULL	NULL	NULL	NULL	NULL	NULL	NULL	NULL	NULL	NULL	NULL	NULL
Nursing	Female	82	26.66	DUAL	2021-03-10 10:02:23	2021-03-10 11:00:00	58	2021-03-10 10:45:00	15	2021-03-10 11:21:00	2021-03-10 11:37:14	16	2021-03-10 11:37:00	2021-03-10 12:15:00	95	38	0	0	0	1	0	1	1	0	0	1	0	4	NULL	NULL	NULL	NULL	NULL	NULL	NULL	NULL	NULL	NULL	NULL	NULL	NULL	NULL	NULL	NULL	NULL	NULL	NULL	NULL	NULL
Nursing	Male	51	25.83	Lower GI	2021-05-03 11:27:51	2021-05-03 11:53:00	26	2021-05-03 11:43:49	10	2021-05-03 12:06:00	2021-05-03 12:11:14	5	2021-05-03 12:14:00	2021-05-03 12:51:00	44	37	NULL	NULL	NULL	NULL	NULL	NULL	NULL	NULL	NULL	NULL	NULL	0	NULL	NULL	NULL	NULL	NULL	NULL	NULL	NULL	NULL	NULL	NULL	NULL	NULL	NULL	NULL	NULL	NULL	NULL	NULL	NULL	NULL
Nursing	Male	51	25.83	Lower GI	2021-02-01 14:03:20	2021-02-01 14:28:00	25	2021-02-01 14:17:00	11	2021-02-01 14:41:00	2021-02-01 14:42:22	1	2021-02-01 14:53:00	2021-02-01 15:27:00	39	34	NULL	NULL	NULL	NULL	NULL	NULL	NULL	NULL	NULL	NULL	NULL	0	NULL	NULL	NULL	NULL	NULL	NULL	NULL	NULL	NULL	NULL	NULL	NULL	NULL	NULL	NULL	NULL	NULL	NULL	NULL	NULL	NULL
Nursing	Male	54	27.2	Lower GI	2020-06-23 12:53:58	2020-06-23 13:29:00	36	2020-06-23 13:14:24	15	2020-06-23 13:39:00	2020-06-23 13:42:28	3	2020-06-23 13:45:00	2020-06-23 14:20:00	49	35	NULL	NULL	NULL	NULL	NULL	NULL	NULL	NULL	NULL	NULL	NULL	0	NULL	NULL	NULL	NULL	NULL	NULL	NULL	NULL	NULL	NULL	NULL	NULL	NULL	NULL	NULL	NULL	NULL	NULL	NULL	NULL	NULL
Nursing	Male	62	22.81	Lower GI	2020-02-12 06:36:17	2020-02-12 07:15:00	39	2020-02-12 07:07:00	8	2020-02-12 07:33:00	2020-02-12 07:36:18	3	2020-02-12 07:39:00	2020-02-12 08:11:00	60	32	1	1	0	1	0	0	0	0	0	0	0	3	NULL	NULL	NULL	NULL	NULL	NULL	NULL	NULL	NULL	NULL	NULL	NULL	NULL	NULL	NULL	NULL	NULL	NULL	NULL	NULL	NULL
Nursing	Male	62	26.69	Lower GI	2021-02-04 10:19:30	2021-02-04 11:05:00	46	2021-02-04 10:58:00	7	2021-02-04 11:19:00	2021-02-04 11:21:48	2	2021-02-04 11:26:00	2021-02-04 12:00:00	62	34	0	0	0	0	0	0	0	0	0	0	0	0	NULL	NULL	NULL	NULL	NULL	NULL	NULL	NULL	NULL	NULL	NULL	NULL	NULL	NULL	NULL	NULL	NULL	NULL	NULL	NULL	NULL
Nursing	Female	72	31.41	Lower GI	2020-02-05 12:46:36	2020-02-05 13:24:00	38	2020-02-05 13:10:03	14	2020-02-05 13:44:00	2020-02-05 13:47:11	3	2020-02-05 13:51:00	2020-02-05 14:34:00	61	43	0	0	1	0	0	1	1	0	0	1	0	4	NULL	NULL	NULL	NULL	NULL	NULL	NULL	NULL	NULL	NULL	NULL	NULL	NULL	NULL	NULL	NULL	NULL	NULL	NULL	NULL	NULL
Nursing	Female	72	32.44	Upper GI	2020-06-09 15:37:00	2020-06-09 16:16:00	39	2020-06-09 16:09:00	7	2020-06-09 16:29:00	2020-06-09 16:38:40	9	2020-06-09 16:39:00	2020-06-09 17:16:00	61	37	0	0	1	0	0	1	1	0	0	1	0	4	NULL	NULL	NULL	NULL	NULL	NULL	NULL	NULL	NULL	NULL	NULL	NULL	NULL	NULL	NULL	NULL	NULL	NULL	NULL	NULL	NULL
Anesthesia	Female	57	19.46	Lower GI	2021-08-06 08:10:00	2021-08-06 08:17:00	7	2021-08-06 08:09:00	8	2021-08-06 08:37:00	2021-08-06 08:40:42	3	2021-08-06 08:45:00	2021-08-06 09:05:00	30	20	0	0	0	0	0	0	0	1	0	0	0	1	NULL	NULL	NULL	NULL	NULL	NULL	NULL	NULL	NULL	NULL	NULL	NULL	NULL	NULL	NULL	NULL	NULL	NULL	NULL	NULL	NULL
Anesthesia	Female	51	32.01	Lower GI	2021-09-13 13:29:03	2021-09-13 13:42:00	13	2021-09-13 13:37:00	5	2021-09-13 14:02:00	2021-09-13 14:07:14	5	2021-09-13 14:08:00	2021-09-13 14:30:00	38	22	0	0	0	1	0	0	0	0	0	0	0	1	NULL	NULL	NULL	NULL	NULL	NULL	NULL	NULL	NULL	NULL	NULL	NULL	NULL	NULL	NULL	NULL	NULL	NULL	NULL	NULL	NULL
Anesthesia	Female	60	42.41	Lower GI	2021-09-16 07:58:21	2021-09-16 08:24:00	26	2021-09-16 08:18:00	6	2021-09-16 09:07:00	2021-09-16 09:15:37	8	2021-09-16 09:16:00	2021-09-16 09:30:00	77	14	0	0	1	1	0	1	0	0	0	0	0	3	NULL	NULL	NULL	NULL	NULL	NULL	NULL	NULL	NULL	NULL	NULL	NULL	NULL	NULL	NULL	NULL	NULL	NULL	NULL	NULL	NULL
Nursing	Male	70	19.64	DUAL	2020-11-02 13:56:31	2020-11-02 14:28:00	32	2020-11-02 14:21:00	7	2020-11-02 14:57:00	2020-11-02 15:01:15	4	2020-11-02 15:00:00	2020-11-02 16:05:00	65	65	0	1	1	1	0	1	0	0	0	0	0	4	NULL	NULL	NULL	NULL	NULL	NULL	NULL	NULL	NULL	NULL	NULL	NULL	NULL	NULL	NULL	NULL	NULL	NULL	NULL	NULL	NULL
Nursing	Female	50	23.13	Lower GI	2021-03-12 10:50:49	2021-03-12 11:21:00	31	2021-03-12 11:13:11	8	2021-03-12 11:33:00	2021-03-12 11:35:03	2	2021-03-12 11:42:00	2021-03-12 12:21:00	45	39	NULL	NULL	NULL	NULL	NULL	NULL	NULL	NULL	NULL	NULL	NULL	0	NULL	NULL	NULL	NULL	NULL	NULL	NULL	NULL	NULL	NULL	NULL	NULL	NULL	NULL	NULL	NULL	NULL	NULL	NULL	NULL	NULL
Nursing	Male	79	34.46	Lower GI	2020-01-07 10:54:56	2020-01-07 11:27:00	33	2020-01-07 11:21:00	6	2020-01-07 12:04:00	2020-01-07 12:07:00	3	2020-01-07 12:13:00	2020-01-07 12:48:00	73	35	1	0	1	1	0	1	0	0	0	0	0	4	NULL	NULL	NULL	NULL	NULL	NULL	NULL	NULL	NULL	NULL	NULL	NULL	NULL	NULL	NULL	NULL	NULL	NULL	NULL	NULL	NULL
Nursing	Female	61	32.61	Upper GI	2020-01-16 09:34:56	2020-01-16 10:09:00	35	2020-01-16 09:57:50	12	2020-01-16 10:20:00	2020-01-16 10:26:10	6	2020-01-16 10:31:00	2020-01-16 11:35:00	52	64	NULL	NULL	NULL	NULL	NULL	NULL	NULL	NULL	NULL	NULL	NULL	0	NULL	NULL	NULL	NULL	NULL	NULL	NULL	NULL	NULL	NULL	NULL	NULL	NULL	NULL	NULL	NULL	NULL	NULL	NULL	NULL	NULL
Nursing	Female	61	32.45	Upper GI	2020-03-19 07:48:47	2020-03-19 08:19:00	31	2020-03-19 08:08:00	11	2020-03-19 08:27:00	2020-03-19 08:32:39	5	2020-03-19 08:36:00	2020-03-19 09:40:00	44	64	NULL	NULL	NULL	NULL	NULL	NULL	NULL	NULL	NULL	NULL	NULL	0	NULL	NULL	NULL	NULL	NULL	NULL	NULL	NULL	NULL	NULL	NULL	NULL	NULL	NULL	NULL	NULL	NULL	NULL	NULL	NULL	NULL
Nursing	Male	59	31.57	Lower GI	2021-02-15 13:21:29	2021-02-15 13:50:00	29	2021-02-15 13:43:46	7	2021-02-15 14:06:00	2021-02-15 14:10:40	4	2021-02-15 14:16:00	2021-02-15 15:05:00	49	49	0	0	0	0	0	0	0	0	0	0	0	0	NULL	NULL	NULL	NULL	NULL	NULL	NULL	NULL	NULL	NULL	NULL	NULL	NULL	NULL	NULL	NULL	NULL	NULL	NULL	NULL	NULL
Nursing	Female	65	20.78	Lower GI	2021-04-02 11:03:56	2021-04-02 11:19:00	16	2021-04-02 11:08:20	11	2021-04-02 11:39:00	2021-04-02 11:43:27	4	2021-04-02 11:46:00	2021-04-02 12:30:00	40	44	NULL	NULL	NULL	NULL	NULL	NULL	NULL	NULL	NULL	NULL	NULL	0	NULL	NULL	NULL	NULL	NULL	NULL	NULL	NULL	NULL	NULL	NULL	NULL	NULL	NULL	NULL	NULL	NULL	NULL	NULL	NULL	NULL
Anesthesia	Female	36	34.33	Lower GI	2021-10-08 12:45:26	2021-10-08 13:07:00	22	2021-10-08 12:59:00	8	2021-10-08 13:20:00	2021-10-08 13:21:25	1	2021-10-08 13:28:00	2021-10-08 14:30:00	36	62	1	0	0	0	0	0	0	0	0	0	0	1	NULL	NULL	NULL	NULL	NULL	NULL	NULL	NULL	NULL	NULL	NULL	NULL	NULL	NULL	NULL	NULL	NULL	NULL	NULL	NULL	NULL
Nursing	Male	64	27.8	Lower GI	2020-04-30 10:06:01	2020-04-30 10:23:00	17	2020-04-30 10:09:00	14	2020-04-30 10:40:00	2020-04-30 10:45:51	5	2020-04-30 10:49:00	2020-04-30 11:12:00	39	23	0	0	0	1	0	0	0	0	0	0	0	1	NULL	NULL	NULL	NULL	NULL	NULL	NULL	NULL	NULL	NULL	NULL	NULL	NULL	NULL	NULL	NULL	NULL	NULL	NULL	NULL	NULL
Nursing	Female	60	36.33	Lower GI	2021-04-06 10:21:46	2021-04-06 10:55:00	34	2021-04-06 10:47:00	8	2021-04-06 11:10:00	2021-04-06 11:11:00	1	2021-04-06 11:20:00	2021-04-06 11:53:00	50	33	0	1	0	0	0	1	0	0	0	0	0	2	NULL	NULL	NULL	NULL	NULL	NULL	NULL	NULL	NULL	NULL	NULL	NULL	NULL	NULL	NULL	NULL	NULL	NULL	NULL	NULL	NULL
Nursing	Male	44	43.76	Lower GI	2020-12-16 09:08:18	2020-12-16 09:24:00	16	2020-12-16 09:11:00	13	2020-12-16 09:33:00	2020-12-16 09:36:44	3	2020-12-16 09:40:00	2020-12-16 09:55:00	28	15	0	0	0	0	0	1	0	1	0	0	0	2	NULL	NULL	NULL	NULL	NULL	NULL	NULL	NULL	NULL	NULL	NULL	NULL	NULL	NULL	NULL	NULL	NULL	NULL	NULL	NULL	NULL
Nursing	Female	43	23.63	Lower GI	2020-01-23 09:38:41	2020-01-23 10:31:00	53	2020-01-23 10:24:00	7	2020-01-23 10:50:00	2020-01-23 10:52:36	2	2020-01-23 11:00:00	2020-01-23 11:43:00	74	43	NULL	NULL	NULL	NULL	NULL	NULL	NULL	NULL	NULL	NULL	NULL	0	NULL	NULL	NULL	NULL	NULL	NULL	NULL	NULL	NULL	NULL	NULL	NULL	NULL	NULL	NULL	NULL	NULL	NULL	NULL	NULL	NULL
Nursing	Male	62	23.48	Lower GI	2020-07-15 09:06:48	2020-07-15 09:33:00	27	2020-07-15 09:22:58	11	2020-07-15 09:44:00	2020-07-15 09:49:35	5	2020-07-15 09:54:00	2020-07-15 10:45:00	43	51	0	0	0	0	0	0	1	0	0	1	0	2	NULL	NULL	NULL	NULL	NULL	NULL	NULL	NULL	NULL	NULL	NULL	NULL	NULL	NULL	NULL	NULL	NULL	NULL	NULL	NULL	NULL
Nursing	Male	62	30.13	Lower GI	2021-04-02 09:36:50	2021-04-02 09:52:00	16	2021-04-02 09:42:00	10	2021-04-02 10:09:00	2021-04-02 10:13:56	4	2021-04-02 10:18:00	2021-04-02 10:36:00	37	18	0	1	0	0	0	1	1	0	0	1	0	4	NULL	NULL	NULL	NULL	NULL	NULL	NULL	NULL	NULL	NULL	NULL	NULL	NULL	NULL	NULL	NULL	NULL	NULL	NULL	NULL	NULL
Anesthesia	Female	50	25.5	Lower GI	2021-09-01 14:34:26	2021-09-01 14:38:00	4	2021-09-01 14:32:00	6	2021-09-01 15:05:00	2021-09-01 15:06:15	1	2021-09-01 15:09:00	2021-09-01 15:57:00	32	48	0	0	0	1	0	0	0	0	0	0	0	1	NULL	NULL	NULL	NULL	NULL	NULL	NULL	NULL	NULL	NULL	NULL	NULL	NULL	NULL	NULL	NULL	NULL	NULL	NULL	NULL	NULL
Nursing	Female	61	30.67	Lower GI	2020-02-12 07:08:37	2020-02-12 07:51:00	43	2020-02-12 07:43:24	8	2020-02-12 08:31:00	2020-02-12 08:32:55	1	2020-02-12 08:35:00	2020-02-12 10:00:00	84	85	0	0	0	1	0	0	0	0	0	0	0	1	NULL	NULL	NULL	NULL	NULL	NULL	NULL	NULL	NULL	NULL	NULL	NULL	NULL	NULL	NULL	NULL	NULL	NULL	NULL	NULL	NULL
Nursing	Male	53	32.42	DUAL	2021-01-12 14:54:03	2021-01-12 15:15:00	21	2021-01-12 15:06:34	9	2021-01-12 15:43:00	2021-01-12 15:44:35	1	2021-01-12 15:50:00	2021-01-12 16:34:00	50	44	0	1	0	1	0	1	1	0	0	1	0	5	NULL	NULL	NULL	NULL	NULL	NULL	NULL	NULL	NULL	NULL	NULL	NULL	NULL	NULL	NULL	NULL	NULL	NULL	NULL	NULL	NULL
Nursing	Female	64	25.75	Lower GI	2021-04-26 14:43:20	2021-04-26 14:51:00	8	2021-04-26 14:44:40	7	2021-04-26 15:10:00	2021-04-26 15:13:54	3	2021-04-26 15:18:00	2021-04-26 15:29:00	30	11	1	0	0	1	0	0	0	0	0	0	0	2	NULL	NULL	NULL	NULL	NULL	NULL	NULL	NULL	NULL	NULL	NULL	NULL	NULL	NULL	NULL	NULL	NULL	NULL	NULL	NULL	NULL
Nursing	Female	51	26.43	Lower GI	2020-11-23 06:56:25	2020-11-23 07:11:00	15	2020-11-23 07:03:16	8	2020-11-23 07:31:00	2020-11-23 07:36:14	5	2020-11-23 07:40:00	2020-11-23 08:20:00	40	40	0	0	0	0	0	1	0	1	0	0	0	2	NULL	NULL	NULL	NULL	NULL	NULL	NULL	NULL	NULL	NULL	NULL	NULL	NULL	NULL	NULL	NULL	NULL	NULL	NULL	NULL	NULL
Anesthesia	Female	61	18.02	Upper GI	2021-08-31 08:45:24	2021-08-31 09:01:00	16	2021-08-31 08:55:00	6	2021-08-31 09:16:00	2021-08-31 09:19:20	3	2021-08-31 09:22:00	2021-08-31 10:14:00	34	52	0	0	0	1	0	0	0	1	0	0	0	2	NULL	NULL	NULL	NULL	NULL	NULL	NULL	NULL	NULL	NULL	NULL	NULL	NULL	NULL	NULL	NULL	NULL	NULL	NULL	NULL	NULL
Nursing	Male	62	19.94	Upper GI	2021-02-09 14:54:49	2021-02-09 15:50:00	56	2021-02-09 15:40:00	10	2021-02-09 15:53:00	2021-02-09 15:56:41	3	2021-02-09 16:02:00	2021-02-09 16:16:00	62	14	0	0	0	0	0	1	0	1	0	0	0	2	NULL	NULL	NULL	NULL	NULL	NULL	NULL	NULL	NULL	NULL	NULL	NULL	NULL	NULL	NULL	NULL	NULL	NULL	NULL	NULL	NULL
Nursing	Male	72	28.66	Lower GI	2021-04-08 14:39:24	2021-04-08 15:08:00	29	2021-04-08 15:02:00	6	2021-04-08 15:28:00	2021-04-08 15:31:24	3	2021-04-08 15:35:00	2021-04-08 16:00:00	52	25	NULL	NULL	NULL	NULL	NULL	NULL	NULL	NULL	NULL	NULL	NULL	0	NULL	NULL	NULL	NULL	NULL	NULL	NULL	NULL	NULL	NULL	NULL	NULL	NULL	NULL	NULL	NULL	NULL	NULL	NULL	NULL	NULL
Nursing	Female	45	30.67	Lower GI	2021-04-29 14:19:20	2021-04-29 15:01:00	42	2021-04-29 14:51:48	10	2021-04-29 15:17:00	2021-04-29 15:21:48	4	2021-04-29 15:27:00	2021-04-29 16:09:00	62	42	NULL	NULL	NULL	NULL	NULL	NULL	NULL	NULL	NULL	NULL	NULL	0	NULL	NULL	NULL	NULL	NULL	NULL	NULL	NULL	NULL	NULL	NULL	NULL	NULL	NULL	NULL	NULL	NULL	NULL	NULL	NULL	NULL
Nursing	Male	54	22.71	Lower GI	2020-05-28 08:32:53	2020-05-28 09:12:00	40	2020-05-28 09:01:32	11	2020-05-28 09:24:00	2020-05-28 09:26:15	2	2020-05-28 09:30:00	2020-05-28 09:59:00	54	29	NULL	NULL	NULL	NULL	NULL	NULL	NULL	NULL	NULL	NULL	NULL	0	NULL	NULL	NULL	NULL	NULL	NULL	NULL	NULL	NULL	NULL	NULL	NULL	NULL	NULL	NULL	NULL	NULL	NULL	NULL	NULL	NULL
Nursing	Male	58	24.21	Upper GI	2021-05-18 09:59:20	2021-05-18 10:23:00	24	2021-05-18 10:13:45	10	2021-05-18 10:25:00	2021-05-18 10:27:21	2	2021-05-18 10:32:00	2021-05-18 12:00:00	28	88	0	0	0	1	0	0	1	1	0	1	0	4	NULL	NULL	NULL	NULL	NULL	NULL	NULL	NULL	NULL	NULL	NULL	NULL	NULL	NULL	NULL	NULL	NULL	NULL	NULL	NULL	NULL
Nursing	Male	58	23.24	Upper GI	2021-03-25 09:48:50	2021-03-25 10:45:00	57	2021-03-25 10:34:41	11	2021-03-25 10:55:00	2021-03-25 10:58:15	3	2021-03-25 11:00:00	2021-03-25 11:40:00	70	40	0	0	0	1	0	0	1	1	0	1	0	4	NULL	NULL	NULL	NULL	NULL	NULL	NULL	NULL	NULL	NULL	NULL	NULL	NULL	NULL	NULL	NULL	NULL	NULL	NULL	NULL	NULL
Nursing	Female	51	23.3	Lower GI	2021-05-28 10:48:30	2021-05-28 11:35:00	47	2021-05-28 11:24:40	11	2021-05-28 11:54:00	2021-05-28 11:55:45	1	2021-05-28 12:04:00	2021-05-28 12:39:00	67	35	0	0	0	1	0	0	0	0	0	0	0	1	NULL	NULL	NULL	NULL	NULL	NULL	NULL	NULL	NULL	NULL	NULL	NULL	NULL	NULL	NULL	NULL	NULL	NULL	NULL	NULL	NULL
Nursing	Female	70	28.28	Upper GI	2020-07-22 08:54:02	2020-07-22 09:19:00	25	2020-07-22 09:11:28	8	2020-07-22 09:29:00	2020-07-22 09:34:45	5	2020-07-22 09:40:00	2020-07-22 10:45:00	40	65	1	1	0	1	0	0	0	0	0	0	0	3	NULL	NULL	NULL	NULL	NULL	NULL	NULL	NULL	NULL	NULL	NULL	NULL	NULL	NULL	NULL	NULL	NULL	NULL	NULL	NULL	NULL
Nursing	Female	56	22.83	Upper GI	2021-02-03 08:00:00	2021-02-03 08:26:00	26	2021-02-03 08:15:00	11	2021-02-03 08:29:00	2021-02-03 08:35:00	6	2021-02-03 08:40:00	2021-02-03 09:13:00	35	33	0	1	0	0	0	1	0	1	0	0	0	3	NULL	NULL	NULL	NULL	NULL	NULL	NULL	NULL	NULL	NULL	NULL	NULL	NULL	NULL	NULL	NULL	NULL	NULL	NULL	NULL	NULL
Nursing	Female	45	20.08	Upper GI	2021-01-20 15:33:01	2021-01-20 15:51:00	18	2021-01-20 15:39:43	12	2021-01-20 15:59:00	2021-01-20 16:01:17	2	2021-01-20 16:08:00	2021-01-20 16:33:00	28	25	0	0	0	0	0	0	0	1	0	0	0	1	NULL	NULL	NULL	NULL	NULL	NULL	NULL	NULL	NULL	NULL	NULL	NULL	NULL	NULL	NULL	NULL	NULL	NULL	NULL	NULL	NULL
Nursing	Female	69	25.61	Lower GI	2020-09-18 09:55:25	2020-09-18 10:54:00	59	2020-09-18 10:40:50	14	2020-09-18 11:22:00	2020-09-18 11:26:00	4	2020-09-18 11:32:00	2020-09-18 12:00:00	91	28	0	0	0	1	0	1	0	0	0	0	0	2	NULL	NULL	NULL	NULL	NULL	NULL	NULL	NULL	NULL	NULL	NULL	NULL	NULL	NULL	NULL	NULL	NULL	NULL	NULL	NULL	NULL
Nursing	Female	42	NULL	Lower GI	2021-04-28 08:20:36	2021-04-28 08:39:00	19	2021-04-28 08:30:00	9	2021-04-28 08:54:00	2021-04-28 08:55:57	1	2021-04-28 09:00:00	2021-04-28 09:34:00	35	34	0	0	0	0	0	1	0	0	0	0	0	1	NULL	NULL	NULL	NULL	NULL	NULL	NULL	NULL	NULL	NULL	NULL	NULL	NULL	NULL	NULL	NULL	NULL	NULL	NULL	NULL	NULL
Nursing	Female	71	29.18	Lower GI	2021-05-27 08:48:14	2021-05-27 09:05:00	17	2021-05-27 08:55:08	10	2021-05-27 09:33:00	2021-05-27 09:37:50	4	2021-05-27 09:42:00	2021-05-27 10:13:00	49	31	0	0	0	0	0	1	0	1	0	0	0	2	NULL	NULL	NULL	NULL	NULL	NULL	NULL	NULL	NULL	NULL	NULL	NULL	NULL	NULL	NULL	NULL	NULL	NULL	NULL	NULL	NULL
Nursing	Male	64	23.24	Lower GI	2020-03-10 08:39:09	2020-03-10 09:19:00	40	2020-03-10 09:11:39	8	2020-03-10 09:50:00	2020-03-10 09:53:41	3	2020-03-10 10:00:00	2020-03-10 10:45:00	74	45	0	0	0	0	0	1	1	0	0	1	1	4	NULL	NULL	NULL	NULL	NULL	NULL	NULL	NULL	NULL	NULL	NULL	NULL	NULL	NULL	NULL	NULL	NULL	NULL	NULL	NULL	NULL
Nursing	Male	64	27.37	Lower GI	2021-05-27 12:51:08	2021-05-27 13:01:00	10	2021-05-27 12:54:00	7	2021-05-27 13:19:00	2021-05-27 13:29:28	10	2021-05-27 13:28:00	2021-05-27 14:15:00	38	47	0	0	0	1	0	0	0	0	0	0	0	1	NULL	NULL	NULL	NULL	NULL	NULL	NULL	NULL	NULL	NULL	NULL	NULL	NULL	NULL	NULL	NULL	NULL	NULL	NULL	NULL	NULL
Nursing	Male	69	26.37	Lower GI	2020-02-07 11:20:00	2020-02-07 11:34:00	14	2020-02-07 11:27:00	7	2020-02-07 11:59:00	2020-02-07 12:02:34	3	2020-02-07 12:08:00	2020-02-07 12:47:00	42	39	1	0	0	0	0	1	1	0	0	1	0	4	NULL	NULL	NULL	NULL	NULL	NULL	NULL	NULL	NULL	NULL	NULL	NULL	NULL	NULL	NULL	NULL	NULL	NULL	NULL	NULL	NULL
Nursing	Female	52	36.61	Upper GI	2020-06-23 13:03:48	2020-06-23 13:32:00	29	2020-06-23 13:20:53	12	2020-06-23 13:49:00	2020-06-23 14:00:00	11	2020-06-23 14:04:00	2020-06-23 14:26:00	57	22	NULL	NULL	NULL	NULL	NULL	NULL	NULL	NULL	NULL	NULL	NULL	0	NULL	NULL	NULL	NULL	NULL	NULL	NULL	NULL	NULL	NULL	NULL	NULL	NULL	NULL	NULL	NULL	NULL	NULL	NULL	NULL	NULL
Anesthesia	Male	59	28.06	Lower GI	2021-08-27 08:58:00	2021-08-27 09:05:00	7	2021-08-27 08:59:00	6	2021-08-27 09:22:00	2021-08-27 09:26:00	4	2021-08-27 09:30:00	2021-08-27 10:14:00	28	44	0	0	0	0	0	1	1	0	0	1	1	4	NULL	NULL	NULL	NULL	NULL	NULL	NULL	NULL	NULL	NULL	NULL	NULL	NULL	NULL	NULL	NULL	NULL	NULL	NULL	NULL	NULL
Nursing	Male	78	18.37	DUAL	2020-01-02 10:42:55	2020-01-02 11:22:00	40	2020-01-02 11:14:16	8	2020-01-02 12:15:00	2020-01-02 12:21:52	6	2020-01-02 12:26:00	2020-01-02 12:52:00	99	26	0	0	0	0	0	1	0	0	0	0	0	1	NULL	NULL	NULL	NULL	NULL	NULL	NULL	NULL	NULL	NULL	NULL	NULL	NULL	NULL	NULL	NULL	NULL	NULL	NULL	NULL	NULL
Nursing	Female	69	21.97	Lower GI	2021-04-07 09:51:40	2021-04-07 10:15:00	24	2021-04-07 10:09:59	6	2021-04-07 10:36:00	2021-04-07 10:37:13	1	2021-04-07 10:45:00	2021-04-07 11:26:00	46	41	NULL	NULL	NULL	NULL	NULL	NULL	NULL	NULL	NULL	NULL	NULL	0	NULL	NULL	NULL	NULL	NULL	NULL	NULL	NULL	NULL	NULL	NULL	NULL	NULL	NULL	NULL	NULL	NULL	NULL	NULL	NULL	NULL
Nursing	Female	50	25.75	Lower GI	2020-08-03 10:22:24	2020-08-03 10:56:00	34	2020-08-03 10:45:18	11	2020-08-03 11:17:00	2020-08-03 11:18:33	1	2020-08-03 11:23:00	2020-08-03 11:31:00	56	8	0	0	0	0	0	1	0	0	0	0	0	1	NULL	NULL	NULL	NULL	NULL	NULL	NULL	NULL	NULL	NULL	NULL	NULL	NULL	NULL	NULL	NULL	NULL	NULL	NULL	NULL	NULL
Anesthesia	Female	80	27.29	Lower GI	2021-09-14 11:59:42	2021-09-14 12:10:00	11	2021-09-14 12:00:00	10	2021-09-14 12:27:00	2021-09-14 12:30:33	3	2021-09-14 12:36:00	2021-09-14 13:13:00	31	37	1	0	0	1	0	1	1	1	0	1	0	6	NULL	NULL	NULL	NULL	NULL	NULL	NULL	NULL	NULL	NULL	NULL	NULL	NULL	NULL	NULL	NULL	NULL	NULL	NULL	NULL	NULL
Nursing	Female	52	25.69	Lower GI	2021-02-19 08:29:57	2021-02-19 09:14:00	45	2021-02-19 09:10:43	4	2021-02-19 09:33:00	2021-02-19 09:39:30	6	2021-02-19 09:40:00	2021-02-19 10:05:00	70	25	0	0	0	1	0	0	0	1	0	0	0	2	NULL	NULL	NULL	NULL	NULL	NULL	NULL	NULL	NULL	NULL	NULL	NULL	NULL	NULL	NULL	NULL	NULL	NULL	NULL	NULL	NULL
Nursing	Female	42	35.78	Lower GI	2021-04-16 10:22:02	2021-04-16 10:36:00	14	2021-04-16 10:25:49	11	2021-04-16 10:56:00	2021-04-16 11:01:46	5	2021-04-16 11:07:00	2021-04-16 12:00:00	39	53	0	0	0	1	0	0	0	0	0	0	0	1	NULL	NULL	NULL	NULL	NULL	NULL	NULL	NULL	NULL	NULL	NULL	NULL	NULL	NULL	NULL	NULL	NULL	NULL	NULL	NULL	NULL
Nursing	Male	61	39.13	Lower GI	2020-09-30 06:56:11	2020-09-30 07:14:00	18	2020-09-30 07:10:26	4	2020-09-30 07:36:00	2020-09-30 07:41:40	5	2020-09-30 07:38:00	2020-09-30 08:00:00	45	22	0	1	0	1	0	1	1	0	0	1	0	5	NULL	NULL	NULL	NULL	NULL	NULL	NULL	NULL	NULL	NULL	NULL	NULL	NULL	NULL	NULL	NULL	NULL	NULL	NULL	NULL	NULL
Anesthesia	Male	72	35.67	Lower GI	2021-09-01 14:12:00	2021-09-01 14:18:00	6	2021-09-01 14:12:00	6	2021-09-01 14:45:00	2021-09-01 14:48:00	3	2021-09-01 14:45:00	2021-09-01 15:30:00	36	45	1	0	0	1	0	1	0	0	0	0	0	3	NULL	NULL	NULL	NULL	NULL	NULL	NULL	NULL	NULL	NULL	NULL	NULL	NULL	NULL	NULL	NULL	NULL	NULL	NULL	NULL	NULL
Anesthesia	Female	52	21.87	DUAL	2021-10-26 14:09:01	2021-10-26 14:26:00	17	2021-10-26 14:18:00	8	2021-10-26 15:03:00	2021-10-26 15:04:09	1	2021-10-26 15:10:00	2021-10-26 15:54:00	55	44	0	0	0	0	0	0	0	1	0	0	0	1	NULL	NULL	NULL	NULL	NULL	NULL	NULL	NULL	NULL	NULL	NULL	NULL	NULL	NULL	NULL	NULL	NULL	NULL	NULL	NULL	NULL
Nursing	Female	63	24.3	Lower GI	2021-02-05 09:11:22	2021-02-05 10:08:00	57	2021-02-05 09:57:38	11	2021-02-05 10:25:00	2021-02-05 10:27:24	2	2021-02-05 10:32:00	2021-02-05 11:10:00	76	38	NULL	NULL	NULL	NULL	NULL	NULL	NULL	NULL	NULL	NULL	NULL	0	NULL	NULL	NULL	NULL	NULL	NULL	NULL	NULL	NULL	NULL	NULL	NULL	NULL	NULL	NULL	NULL	NULL	NULL	NULL	NULL	NULL
Nursing	Male	58	22.76	Upper GI	2021-01-25 10:49:29	2021-01-25 11:21:00	32	2021-01-25 11:11:26	10	2021-01-25 11:34:00	2021-01-25 11:37:40	3	2021-01-25 11:41:00	2021-01-25 11:58:00	48	17	0	0	0	1	0	1	1	0	0	1	0	4	NULL	NULL	NULL	NULL	NULL	NULL	NULL	NULL	NULL	NULL	NULL	NULL	NULL	NULL	NULL	NULL	NULL	NULL	NULL	NULL	NULL
Nursing	Male	64	35.15	Lower GI	2020-08-18 12:51:36	2020-08-18 13:08:00	17	2020-08-18 12:58:00	10	2020-08-18 13:29:00	2020-08-18 13:30:55	1	2020-08-18 13:37:00	2020-08-18 14:22:00	39	45	1	1	0	0	0	1	0	0	0	0	0	3	NULL	NULL	NULL	NULL	NULL	NULL	NULL	NULL	NULL	NULL	NULL	NULL	NULL	NULL	NULL	NULL	NULL	NULL	NULL	NULL	NULL
Nursing	Male	65	29.69	Lower GI	2021-03-03 09:09:40	2021-03-03 09:47:00	38	2021-03-03 09:37:16	10	2021-03-03 10:10:00	2021-03-03 10:13:10	3	2021-03-03 10:19:00	2021-03-03 10:54:00	64	35	0	0	0	0	0	1	0	0	0	0	0	1	NULL	NULL	NULL	NULL	NULL	NULL	NULL	NULL	NULL	NULL	NULL	NULL	NULL	NULL	NULL	NULL	NULL	NULL	NULL	NULL	NULL
Nursing	Male	61	35.24	Lower GI	2021-01-26 06:59:54	2021-01-26 07:20:00	21	2021-01-26 07:14:00	6	2021-01-26 07:34:00	2021-01-26 07:37:00	3	2021-01-26 07:43:00	2021-01-26 08:10:00	38	27	0	0	0	0	0	1	0	1	0	0	0	2	NULL	NULL	NULL	NULL	NULL	NULL	NULL	NULL	NULL	NULL	NULL	NULL	NULL	NULL	NULL	NULL	NULL	NULL	NULL	NULL	NULL
Nursing	Female	57	24.91	Lower GI	2020-02-25 06:43:28	2020-02-25 07:25:00	42	2020-02-25 07:14:40	11	2020-02-25 07:43:00	2020-02-25 07:49:58	6	2020-02-25 07:55:00	2020-02-25 08:57:00	66	62	NULL	NULL	NULL	NULL	NULL	NULL	NULL	NULL	NULL	NULL	NULL	0	NULL	NULL	NULL	NULL	NULL	NULL	NULL	NULL	NULL	NULL	NULL	NULL	NULL	NULL	NULL	NULL	NULL	NULL	NULL	NULL	NULL
Anesthesia	Female	72	32.27	Lower GI	2021-09-02 13:00:00	2021-09-02 13:08:00	8	2021-09-02 13:00:00	8	2021-09-02 13:24:00	2021-09-02 13:26:34	2	2021-09-02 13:33:00	2021-09-02 14:00:00	26	27	0	0	0	0	0	1	0	0	0	0	0	1	NULL	NULL	NULL	NULL	NULL	NULL	NULL	NULL	NULL	NULL	NULL	NULL	NULL	NULL	NULL	NULL	NULL	NULL	NULL	NULL	NULL
Anesthesia	Female	74	36	Lower GI	2021-09-30 10:41:41	2021-09-30 11:05:00	24	2021-09-30 10:42:00	23	2021-09-30 11:32:00	2021-09-30 11:38:34	6	2021-09-30 11:42:00	2021-09-30 12:01:00	57	19	0	0	0	1	0	1	0	0	0	0	0	2	NULL	NULL	NULL	NULL	NULL	NULL	NULL	NULL	NULL	NULL	NULL	NULL	NULL	NULL	NULL	NULL	NULL	NULL	NULL	NULL	NULL
Nursing	Female	73	30.67	Lower GI	2021-06-07 10:19:52	2021-06-07 10:37:00	18	2021-06-07 10:27:00	10	2021-06-07 10:50:00	2021-06-07 10:56:14	6	2021-06-07 11:00:00	2021-06-07 11:44:00	37	44	0	0	0	0	0	1	0	0	0	0	0	1	NULL	NULL	NULL	NULL	NULL	NULL	NULL	NULL	NULL	NULL	NULL	NULL	NULL	NULL	NULL	NULL	NULL	NULL	NULL	NULL	NULL
Nursing	Female	37	24.37	Upper GI	2020-10-29 14:19:35	2020-10-29 15:07:00	48	2020-10-29 15:00:56	7	2020-10-29 15:12:00	2020-10-29 15:16:09	4	2020-10-29 15:21:00	2020-10-29 15:59:00	57	38	1	1	0	1	0	0	1	0	0	1	0	5	NULL	NULL	NULL	NULL	NULL	NULL	NULL	NULL	NULL	NULL	NULL	NULL	NULL	NULL	NULL	NULL	NULL	NULL	NULL	NULL	NULL
Nursing	Male	69	23.68	Upper GI	2020-06-18 10:19:53	2020-06-18 10:34:00	15	2020-06-18 10:28:00	6	2020-06-18 10:38:00	2020-06-18 10:43:10	5	2020-06-18 10:46:00	2020-06-18 11:10:00	24	24	1	0	1	0	0	0	0	0	0	0	0	2	NULL	NULL	NULL	NULL	NULL	NULL	NULL	NULL	NULL	NULL	NULL	NULL	NULL	NULL	NULL	NULL	NULL	NULL	NULL	NULL	NULL
Nursing	Female	51	41.44	Lower GI	2020-01-24 10:31:59	2020-01-24 11:15:00	44	2020-01-24 11:07:00	8	2020-01-24 11:29:00	2020-01-24 11:33:40	4	2020-01-24 11:40:00	2020-01-24 12:18:00	62	38	1	1	0	0	0	1	0	0	0	0	0	3	NULL	NULL	NULL	NULL	NULL	NULL	NULL	NULL	NULL	NULL	NULL	NULL	NULL	NULL	NULL	NULL	NULL	NULL	NULL	NULL	NULL
Nursing	Female	51	31.31	Lower GI	2020-01-13 08:48:49	2020-01-13 09:35:00	47	2020-01-13 09:27:14	8	2020-01-13 09:51:00	2020-01-13 09:55:25	4	2020-01-13 10:00:00	2020-01-13 11:00:00	67	60	0	0	0	0	0	0	0	1	0	0	0	1	NULL	NULL	NULL	NULL	NULL	NULL	NULL	NULL	NULL	NULL	NULL	NULL	NULL	NULL	NULL	NULL	NULL	NULL	NULL	NULL	NULL
Nursing	Male	63	26.93	Lower GI	2020-10-30 13:38:02	2020-10-30 14:05:00	27	2020-10-30 13:47:57	18	2020-10-30 14:24:00	2020-10-30 14:28:49	4	2020-10-30 14:37:00	2020-10-30 14:46:00	50	9	0	1	0	1	0	1	0	0	0	0	0	3	NULL	NULL	NULL	NULL	NULL	NULL	NULL	NULL	NULL	NULL	NULL	NULL	NULL	NULL	NULL	NULL	NULL	NULL	NULL	NULL	NULL
Anesthesia	Male	77	27.98	Upper GI	2021-09-10 12:05:37	2021-09-10 12:10:00	5	2021-09-10 12:03:00	7	2021-09-10 12:17:00	2021-09-10 12:27:20	10	2021-09-10 12:30:00	2021-09-10 12:58:00	22	28	0	0	0	0	0	1	1	0	0	1	0	3	NULL	NULL	NULL	NULL	NULL	NULL	NULL	NULL	NULL	NULL	NULL	NULL	NULL	NULL	NULL	NULL	NULL	NULL	NULL	NULL	NULL
Nursing	Male	60	30.54	Lower GI	2020-10-30 10:20:00	2020-10-30 10:38:00	18	2020-10-30 10:28:00	10	2020-10-30 10:53:00	2020-10-30 10:58:00	5	2020-10-30 11:00:00	2020-10-30 11:32:00	38	32	NULL	NULL	NULL	NULL	NULL	NULL	NULL	NULL	NULL	NULL	NULL	0	NULL	NULL	NULL	NULL	NULL	NULL	NULL	NULL	NULL	NULL	NULL	NULL	NULL	NULL	NULL	NULL	NULL	NULL	NULL	NULL	NULL
Nursing	Male	51	24.91	Lower GI	2020-07-06 08:20:07	2020-07-06 08:41:00	21	2020-07-06 08:34:04	7	2020-07-06 08:45:00	2020-07-06 08:49:05	4	2020-07-06 08:53:00	2020-07-06 09:56:00	29	63	1	0	0	1	0	1	0	0	0	0	0	3	NULL	NULL	NULL	NULL	NULL	NULL	NULL	NULL	NULL	NULL	NULL	NULL	NULL	NULL	NULL	NULL	NULL	NULL	NULL	NULL	NULL
Nursing	Female	76	24.24	Lower GI	2020-02-03 08:57:31	2020-02-03 09:20:00	23	2020-02-03 09:11:54	9	2020-02-03 09:35:00	2020-02-03 09:38:46	3	2020-02-03 09:45:00	2020-02-03 11:12:00	41	87	0	0	0	0	0	1	0	0	0	0	0	1	4	mg	NULL	NULL	NULL	NULL	NULL	NULL	NULL	NULL	NULL	NULL	NULL	NULL	NULL	NULL	NULL	NULL	NULL	NULL	NULL
Nursing	Female	69	25.79	Lower GI	2020-11-17 07:28:36	2020-11-17 07:47:00	19	2020-11-17 07:38:16	9	2020-11-17 08:06:00	2020-11-17 08:10:59	4	2020-11-17 08:15:00	2020-11-17 08:47:00	42	32	0	0	0	1	0	1	0	0	0	0	0	2	NULL	NULL	NULL	NULL	NULL	NULL	NULL	NULL	NULL	NULL	NULL	NULL	NULL	NULL	NULL	NULL	NULL	NULL	NULL	NULL	NULL
Nursing	Female	61	28.73	Lower GI	2020-08-04 08:17:19	2020-08-04 08:35:00	18	2020-08-04 08:27:07	8	2020-08-04 08:54:00	2020-08-04 08:56:32	2	2020-08-04 09:00:00	2020-08-04 09:44:00	39	44	0	0	0	0	0	1	0	1	0	0	0	2	NULL	NULL	NULL	NULL	NULL	NULL	NULL	NULL	NULL	NULL	NULL	NULL	NULL	NULL	NULL	NULL	NULL	NULL	NULL	NULL	NULL
Nursing	Female	62	25.82	Lower GI	2021-02-01 10:31:04	2021-02-01 10:43:00	12	2021-02-01 10:36:00	7	2021-02-01 11:02:00	2021-02-01 11:04:22	2	2021-02-01 11:10:00	2021-02-01 11:39:00	33	29	0	0	0	0	0	1	0	0	0	0	0	1	NULL	NULL	NULL	NULL	NULL	NULL	NULL	NULL	NULL	NULL	NULL	NULL	NULL	NULL	NULL	NULL	NULL	NULL	NULL	NULL	NULL
Nursing	Female	53	32.42	Upper GI	2020-02-24 15:51:19	2020-02-24 16:09:00	18	2020-02-24 15:58:23	11	2020-02-24 16:15:00	2020-02-24 16:16:47	1	2020-02-24 16:25:00	2020-02-24 17:21:00	25	56	NULL	NULL	NULL	NULL	NULL	NULL	NULL	NULL	NULL	NULL	NULL	0	NULL	NULL	NULL	NULL	NULL	NULL	NULL	NULL	NULL	NULL	NULL	NULL	NULL	NULL	NULL	NULL	NULL	NULL	NULL	NULL	NULL
Nursing	Female	41	31.24	Upper GI	2020-06-16 06:48:10	2020-06-16 07:35:00	47	2020-06-16 07:14:17	21	2020-06-16 07:38:00	2020-06-16 07:39:35	1	2020-06-16 07:47:00	2020-06-16 08:41:00	51	54	0	0	0	0	0	0	0	1	0	0	0	1	NULL	NULL	NULL	NULL	NULL	NULL	NULL	NULL	NULL	NULL	NULL	NULL	NULL	NULL	NULL	NULL	NULL	NULL	NULL	NULL	NULL
Nursing	Male	71	33.87	Lower GI	2021-02-03 06:43:11	2021-02-03 07:12:00	29	2021-02-03 07:07:00	5	2021-02-03 07:34:00	2021-02-03 07:35:03	1	2021-02-03 07:44:00	2021-02-03 08:14:00	52	30	0	0	0	0	0	1	0	0	0	0	0	1	NULL	NULL	NULL	NULL	NULL	NULL	NULL	NULL	NULL	NULL	NULL	NULL	NULL	NULL	NULL	NULL	NULL	NULL	NULL	NULL	NULL
[truncated: 4,783 more rows]
[truncated: 15 more columns]

## Sheet: Case Counts
AMC Case Count By Room 1.1.23-8.31.23
1.1.23-9.18.23	January	February	March	April			May	June	July	August	September	October	November	December
AIP 1	236	256	288	257			259	276	251	295
AIP 2	233	237	298	252			256	277	209	268
[truncated: 4 more rows]
